# Supplementary material for: The ER membrane protein complex interacts cotranslationally to enable biogenesis of multipass membrane proteins
Source: eLife journal article supplement (doi:10.7554/elife.37018), 2018-05-29

# FKS1

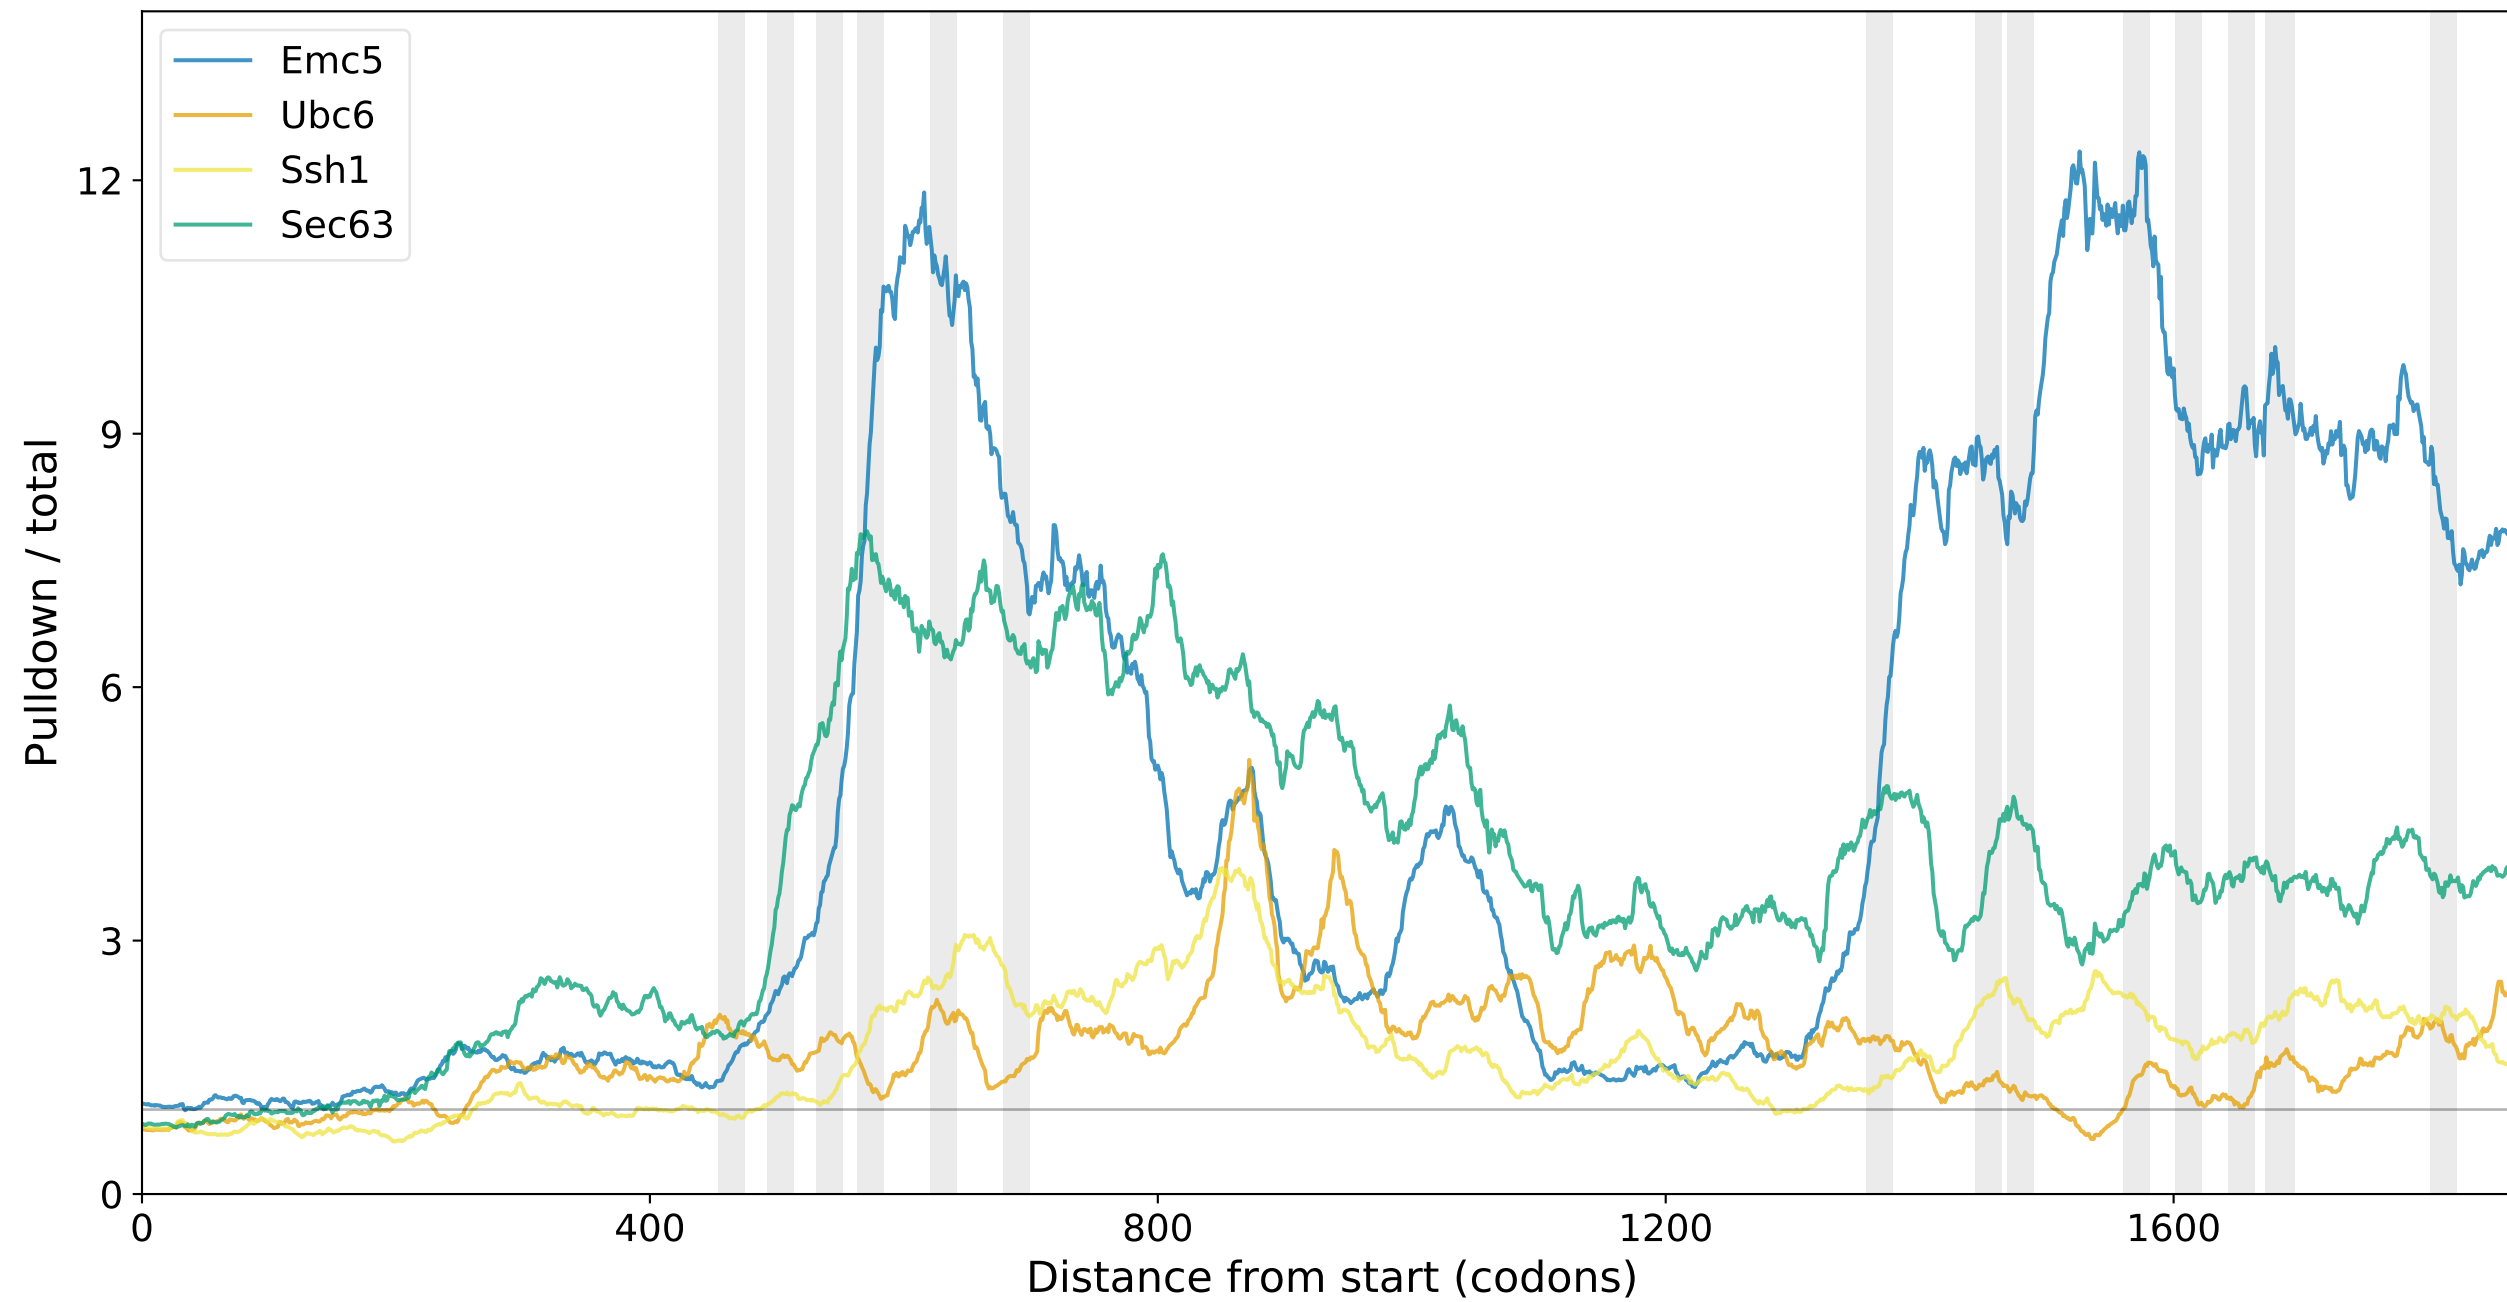

## GSC2

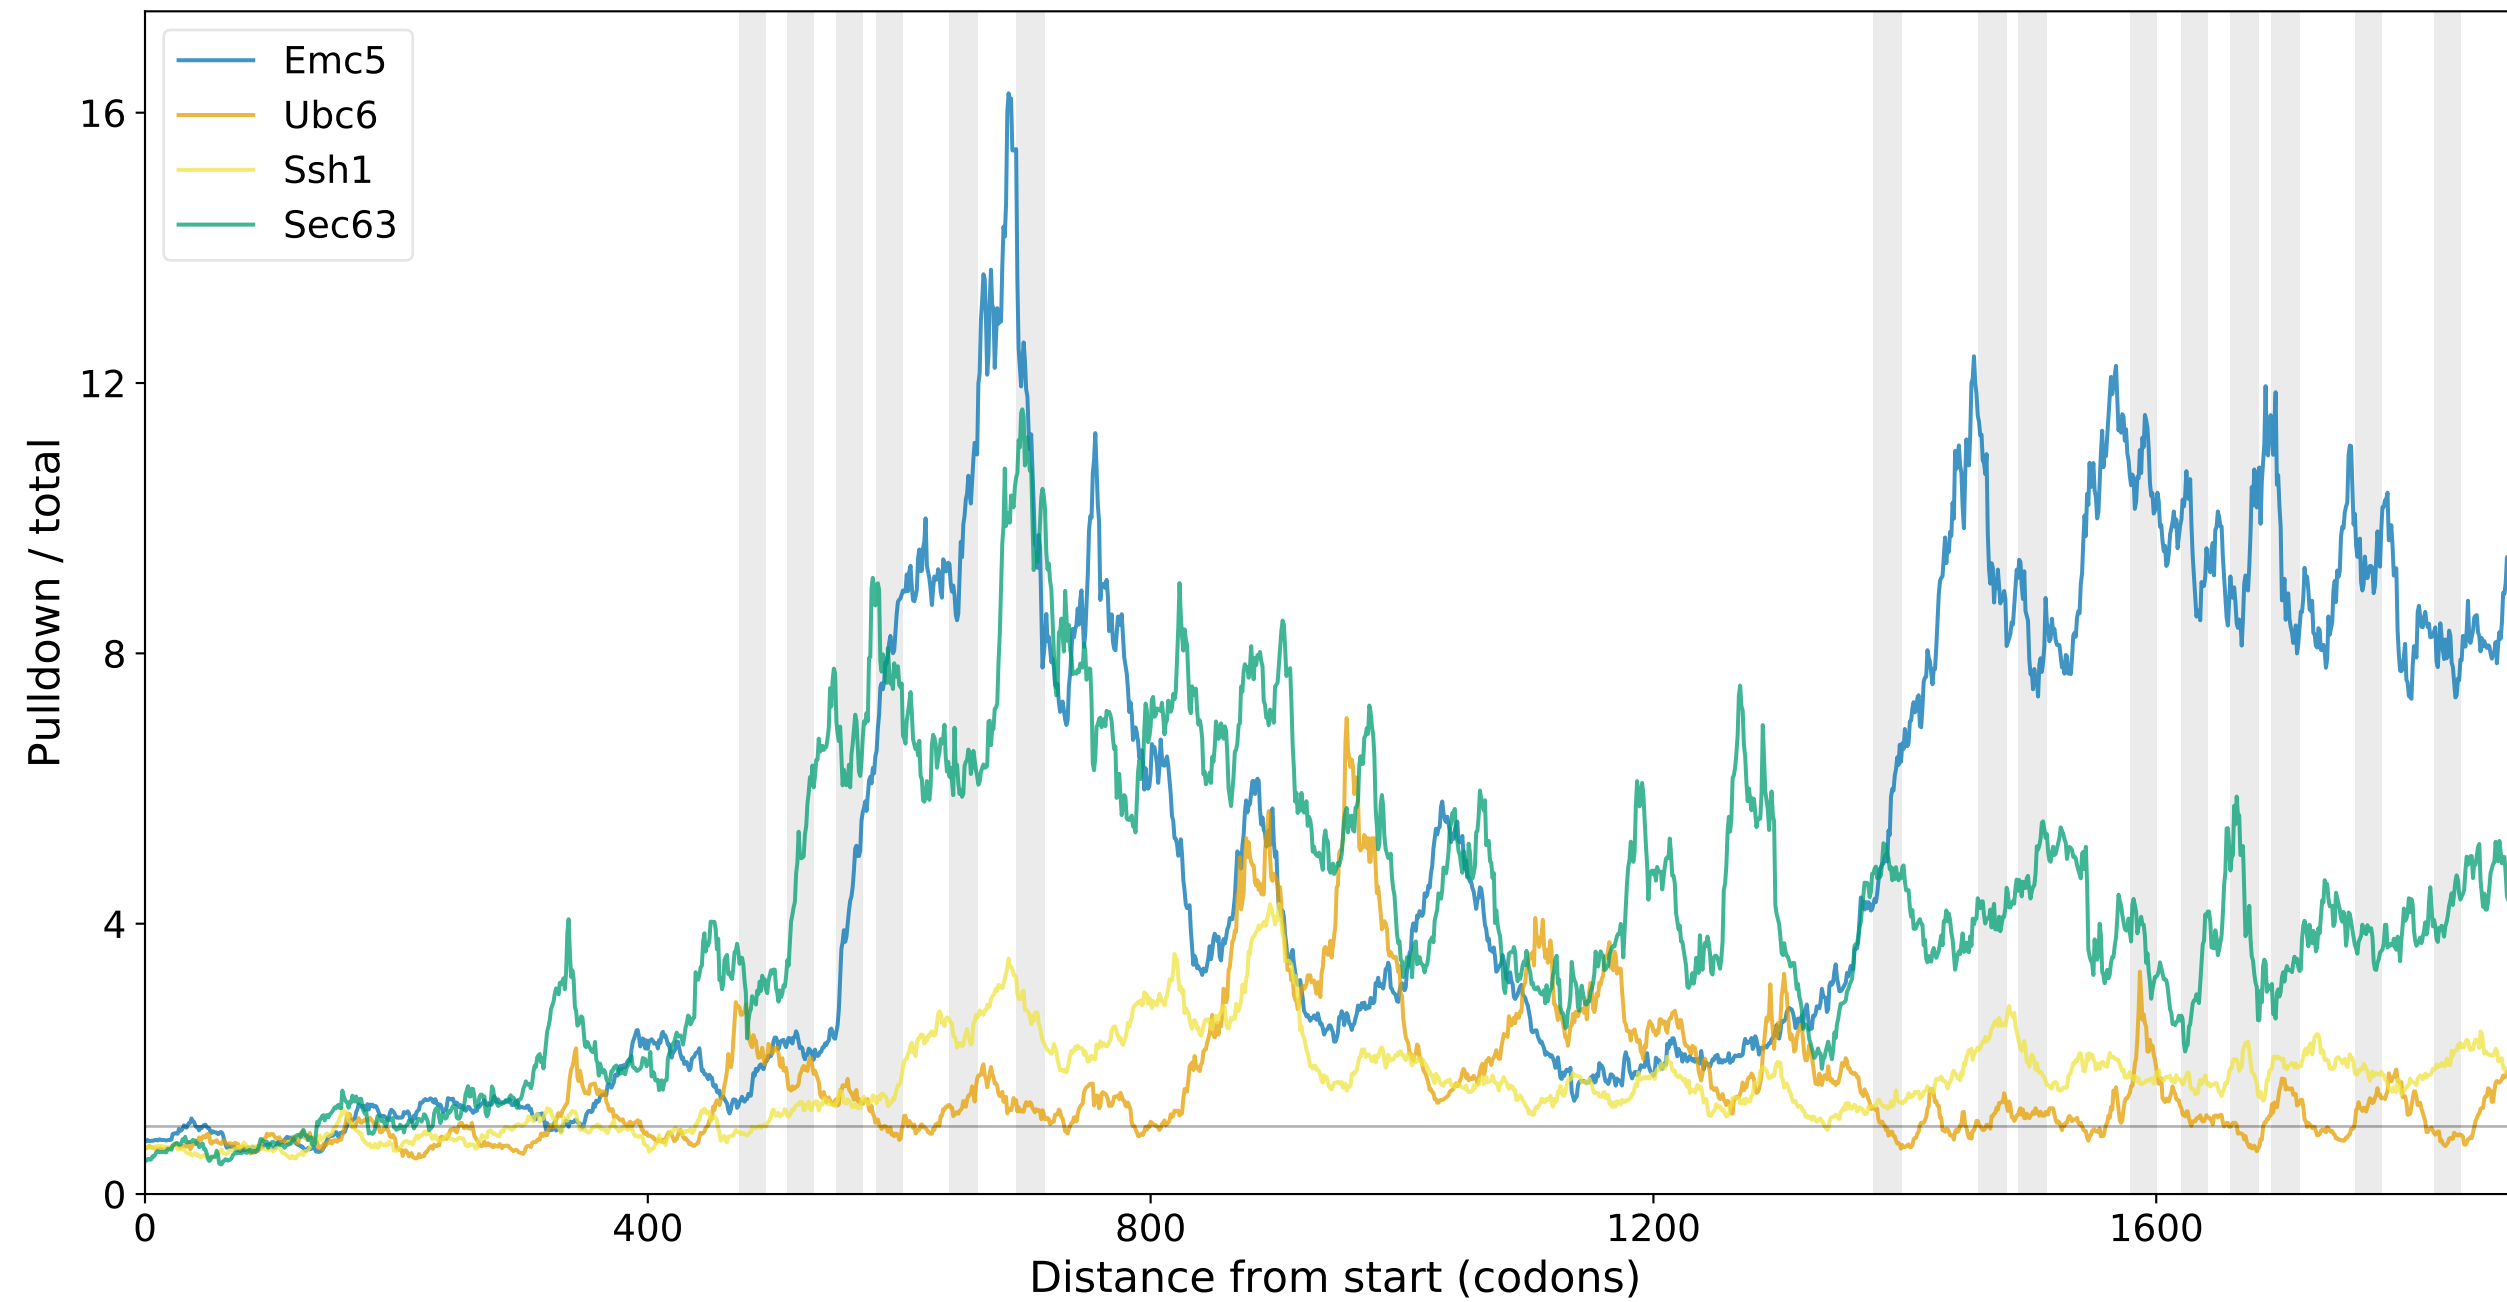

# IZH3

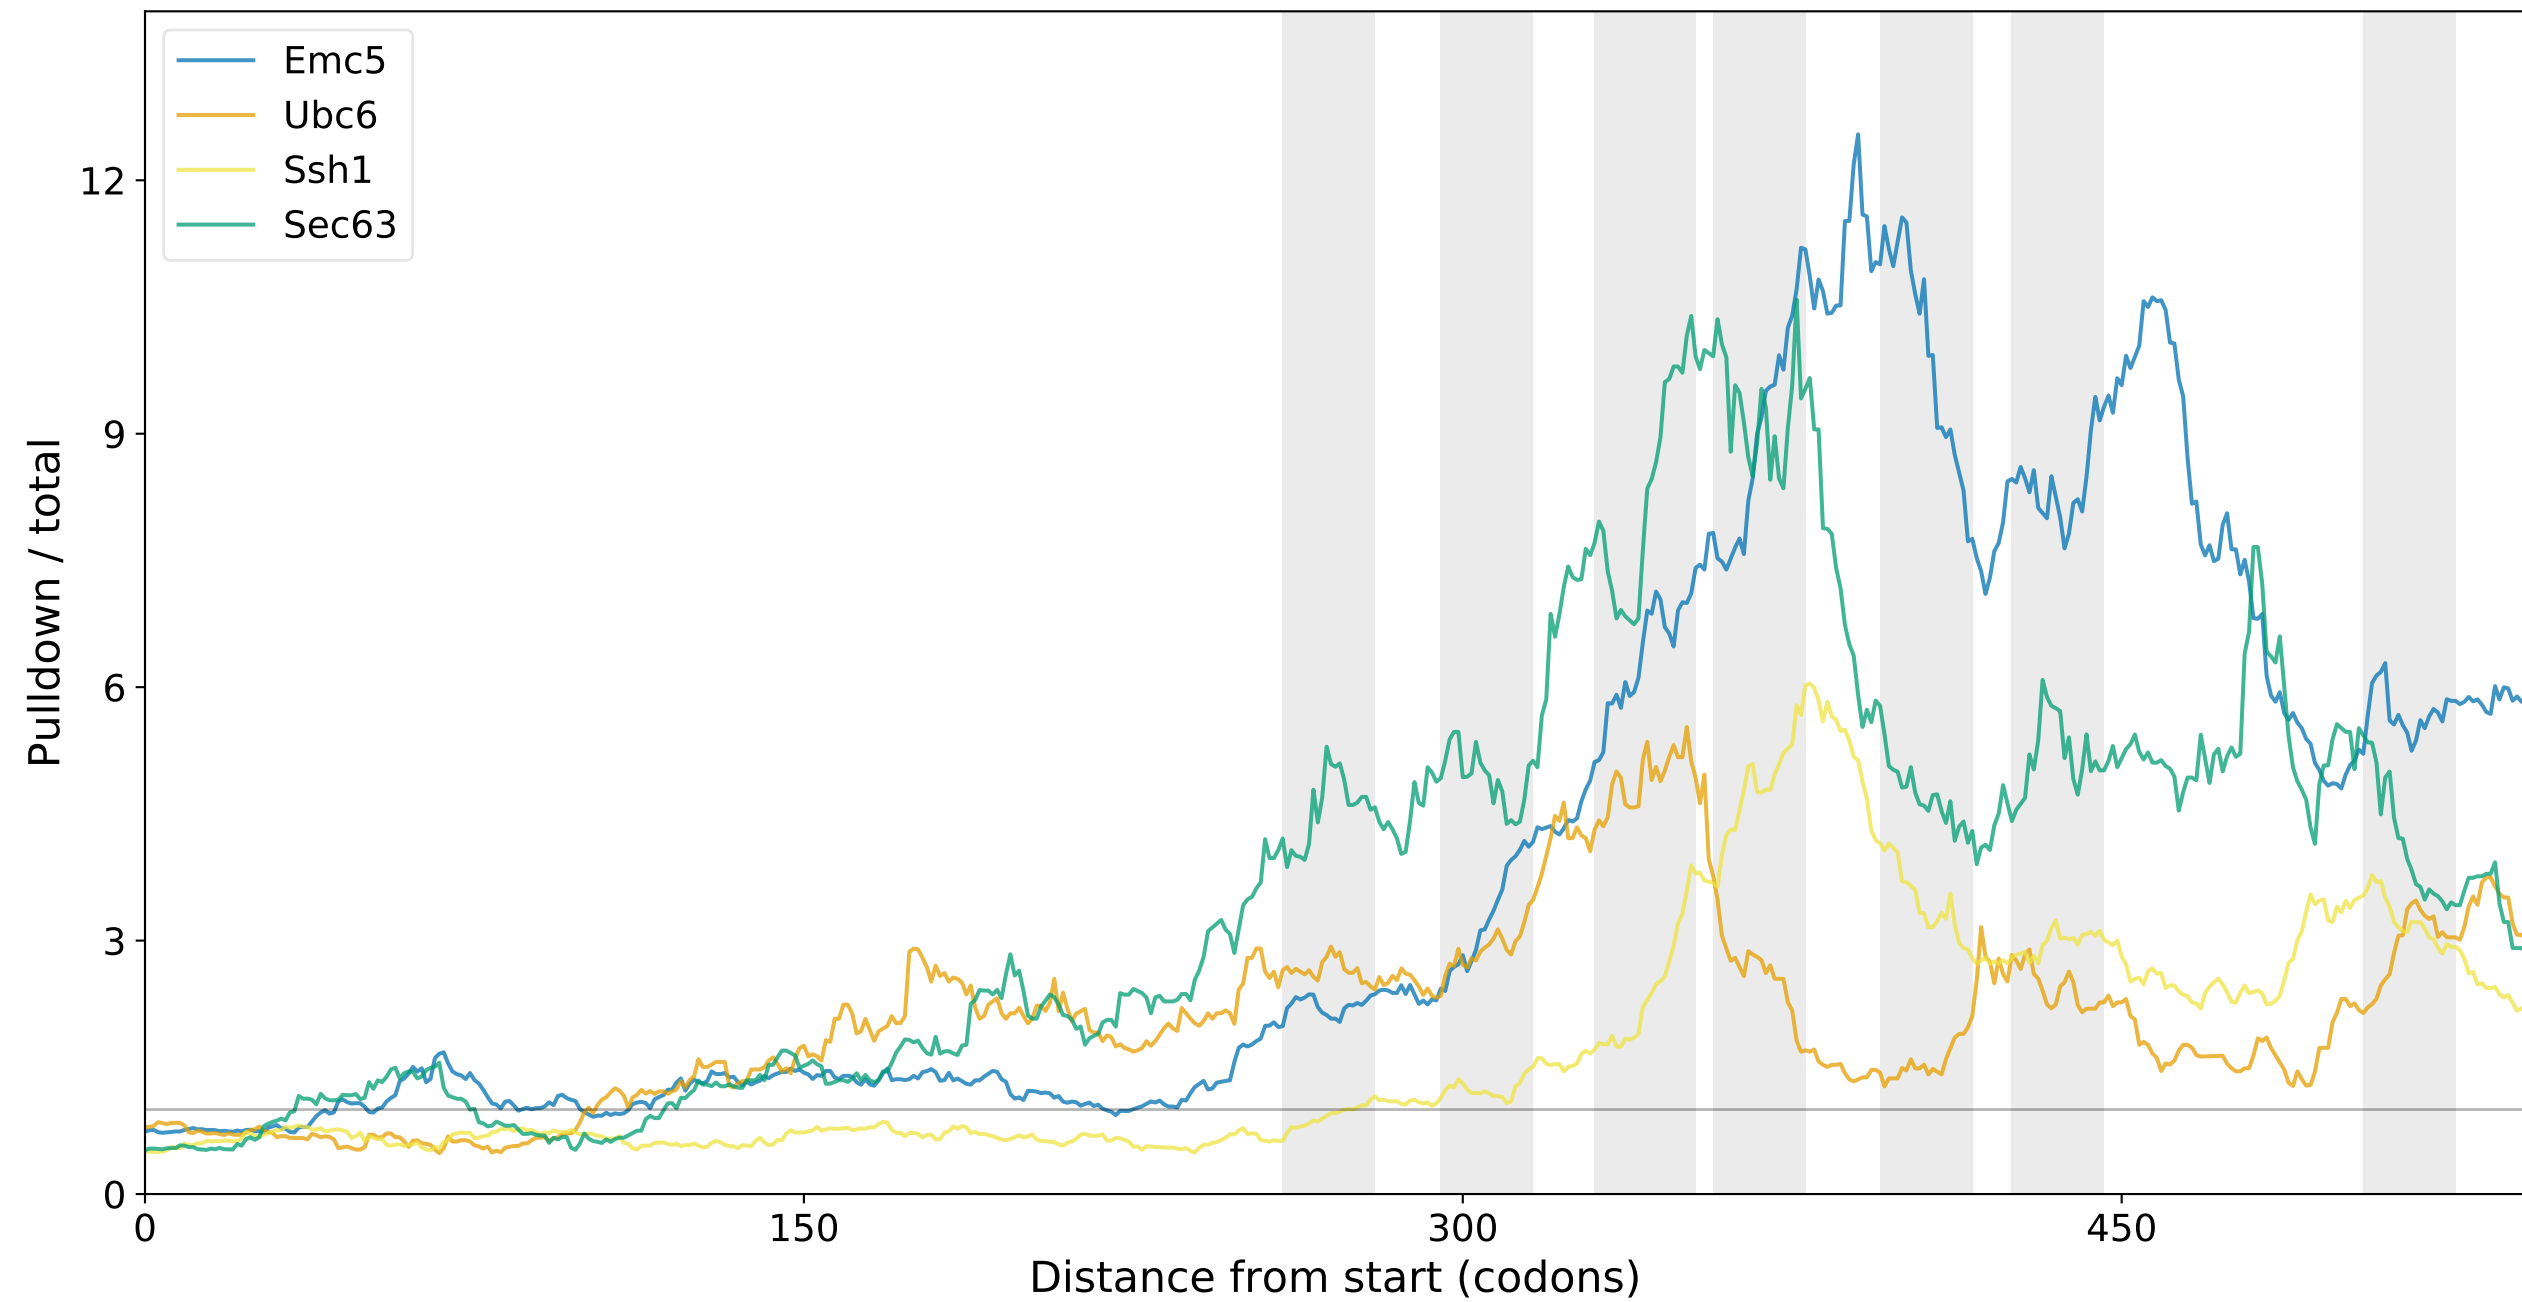

# GPT2

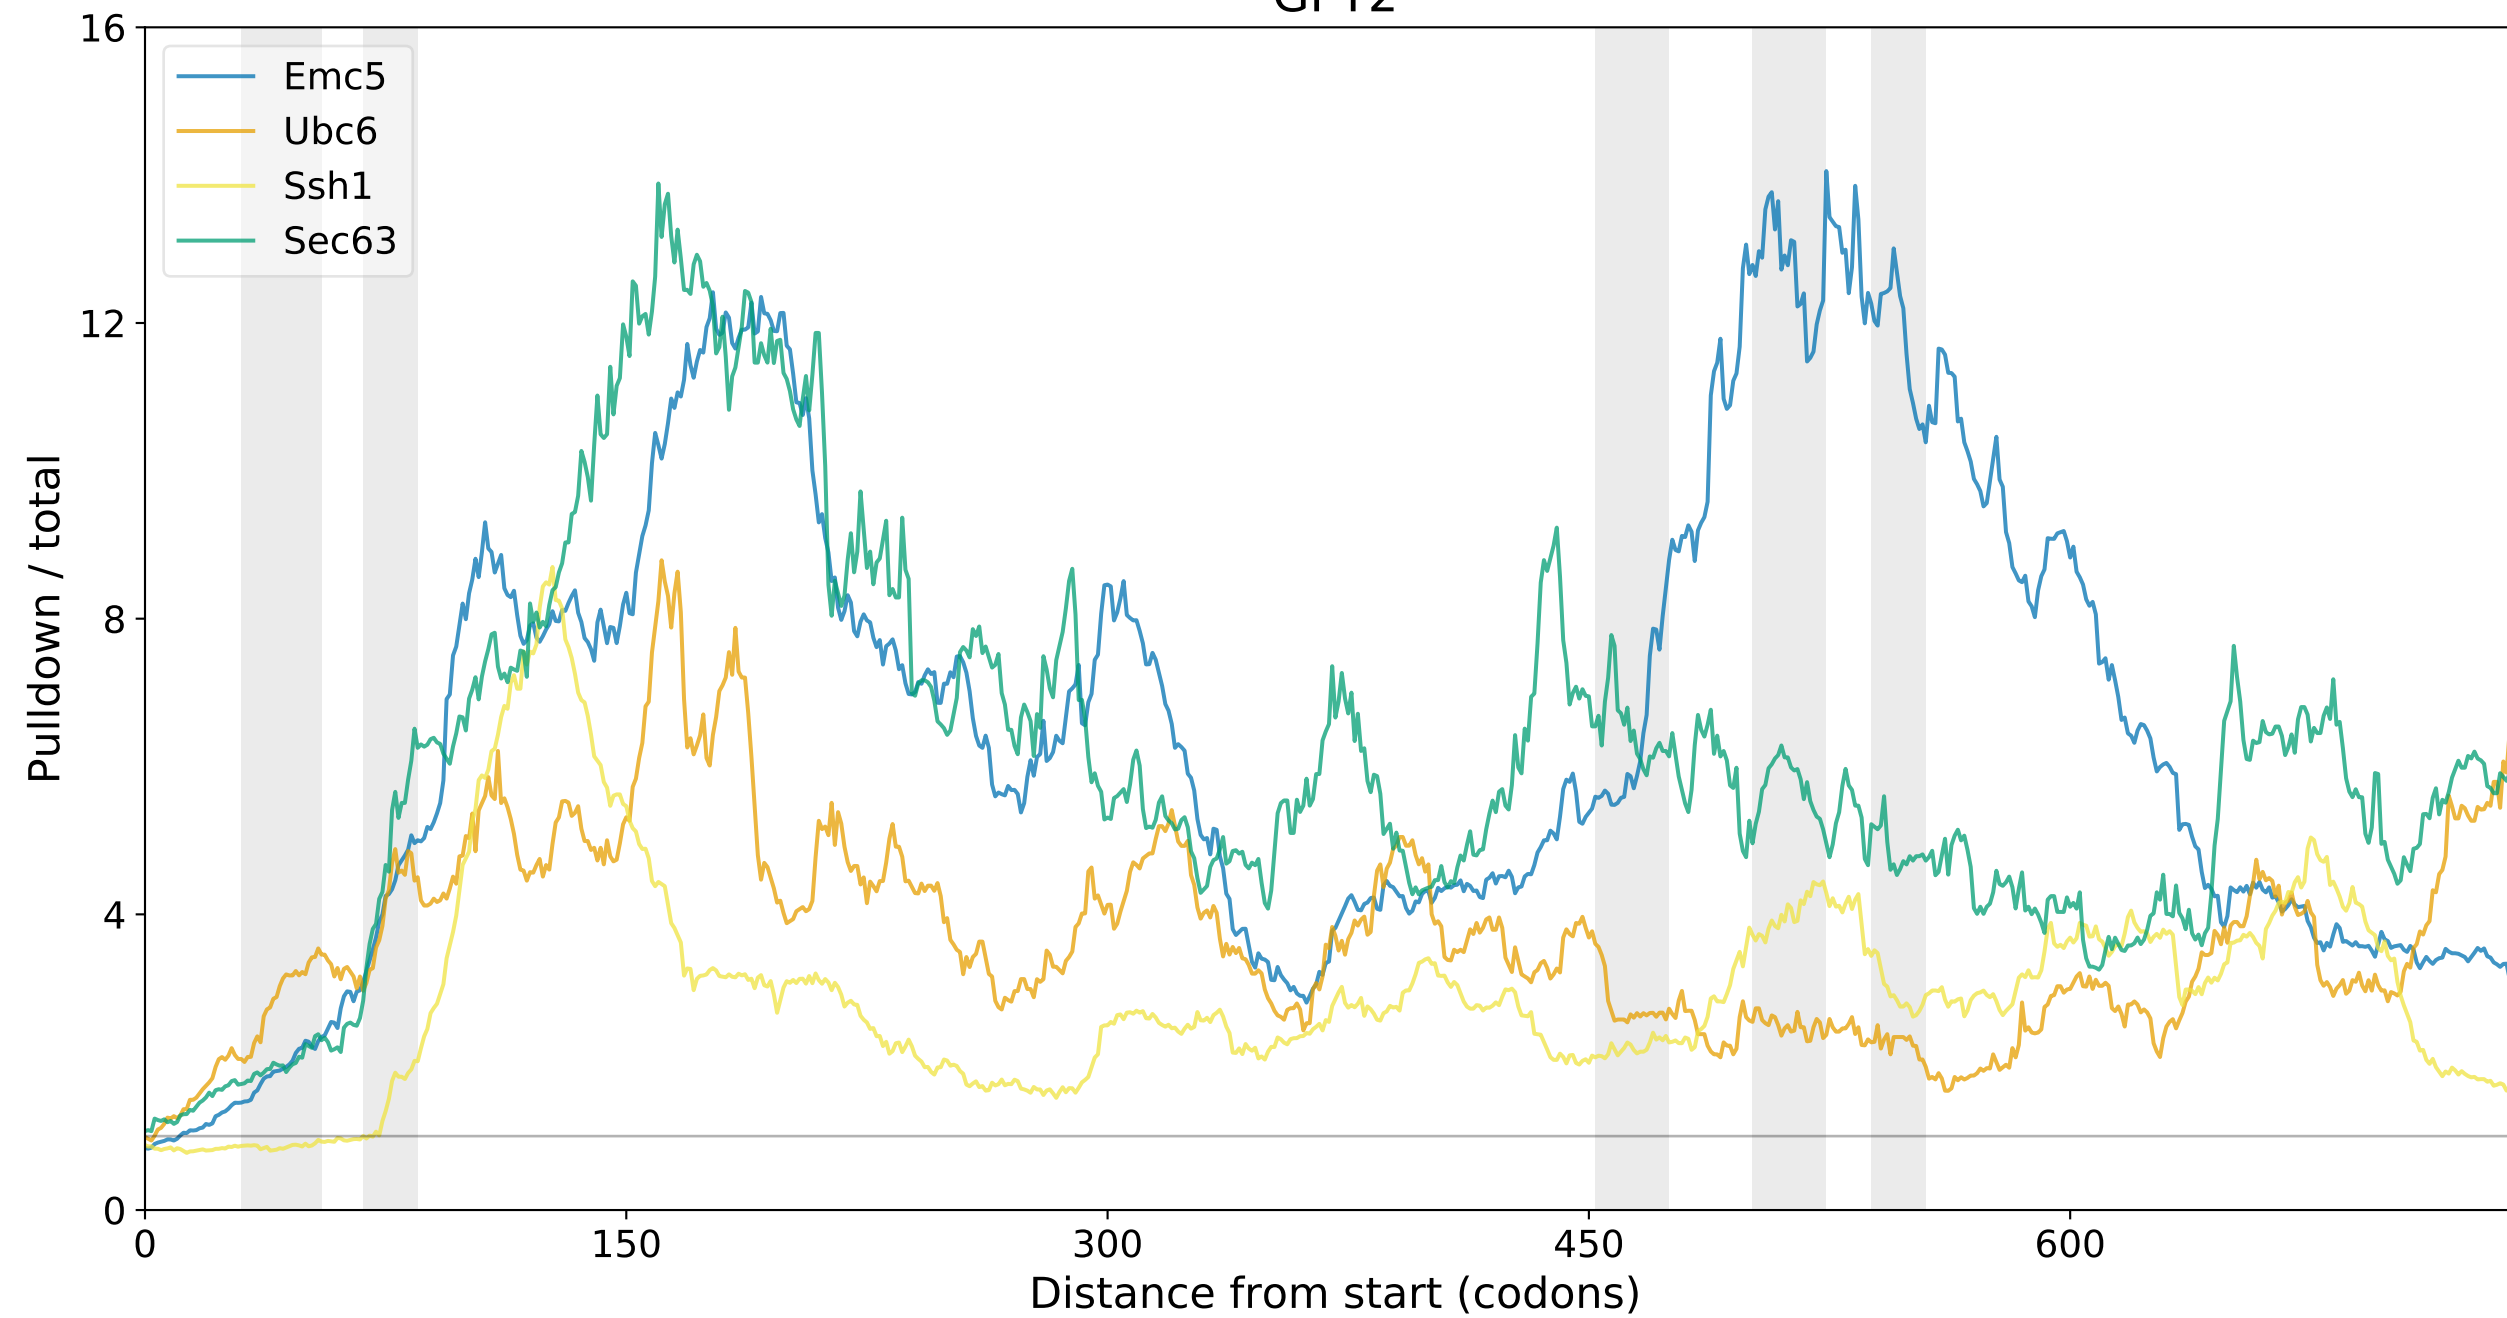

# EMP65

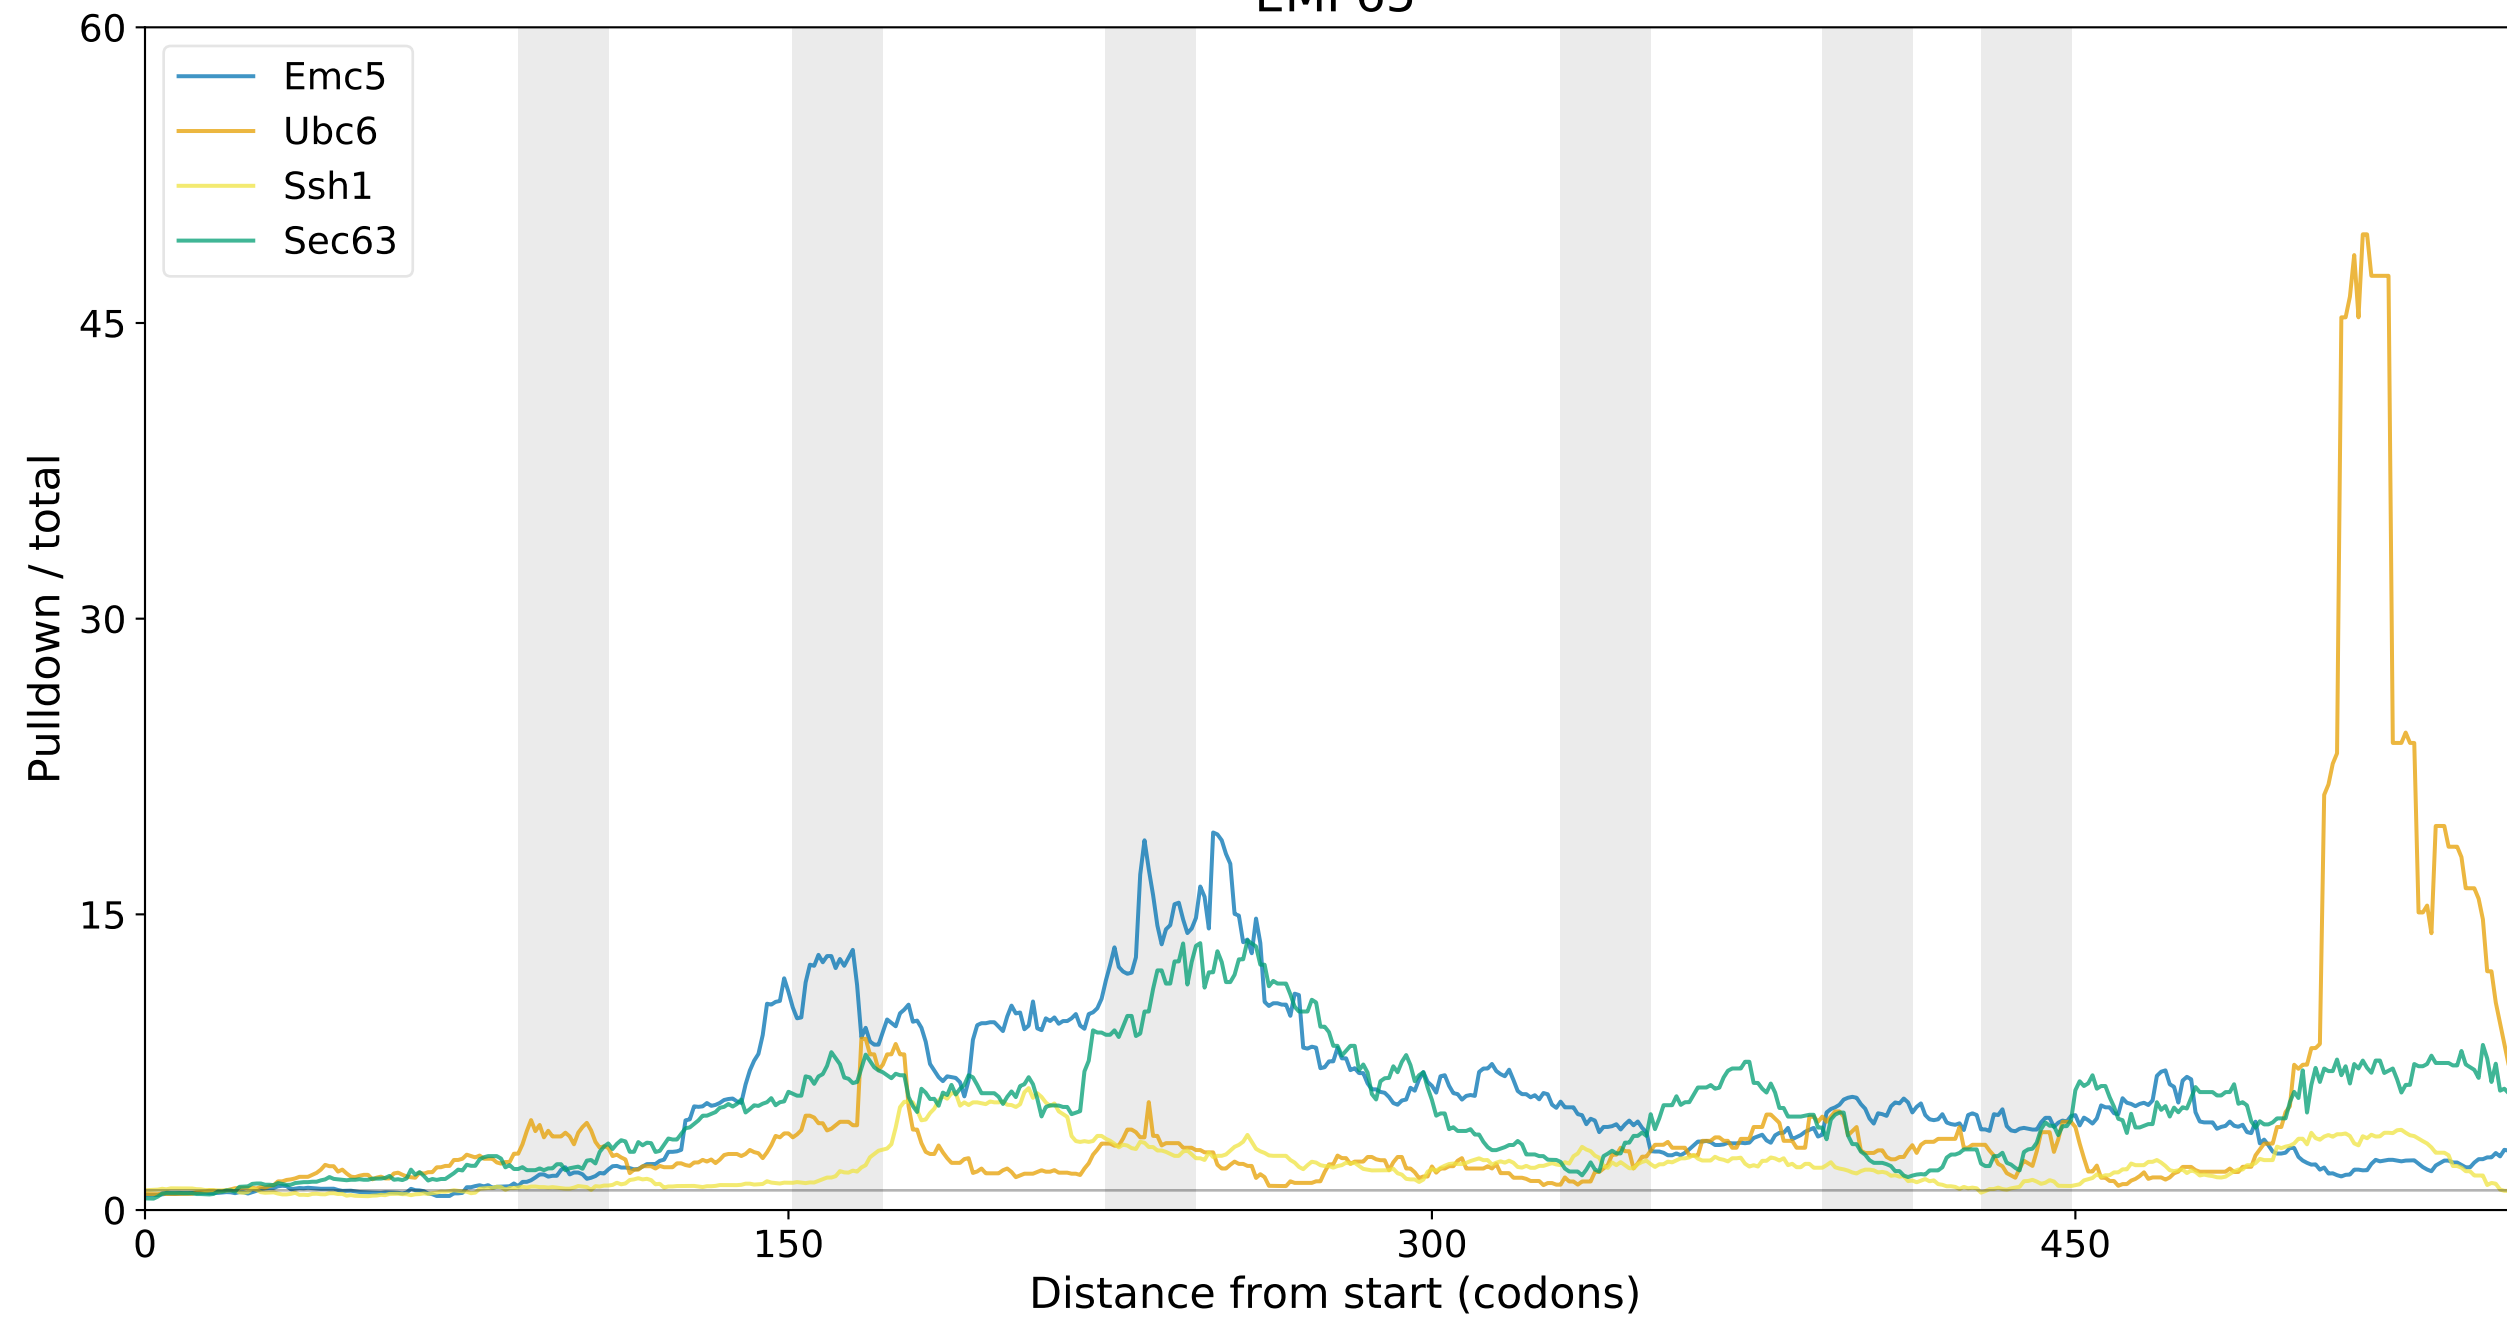

# PDR12

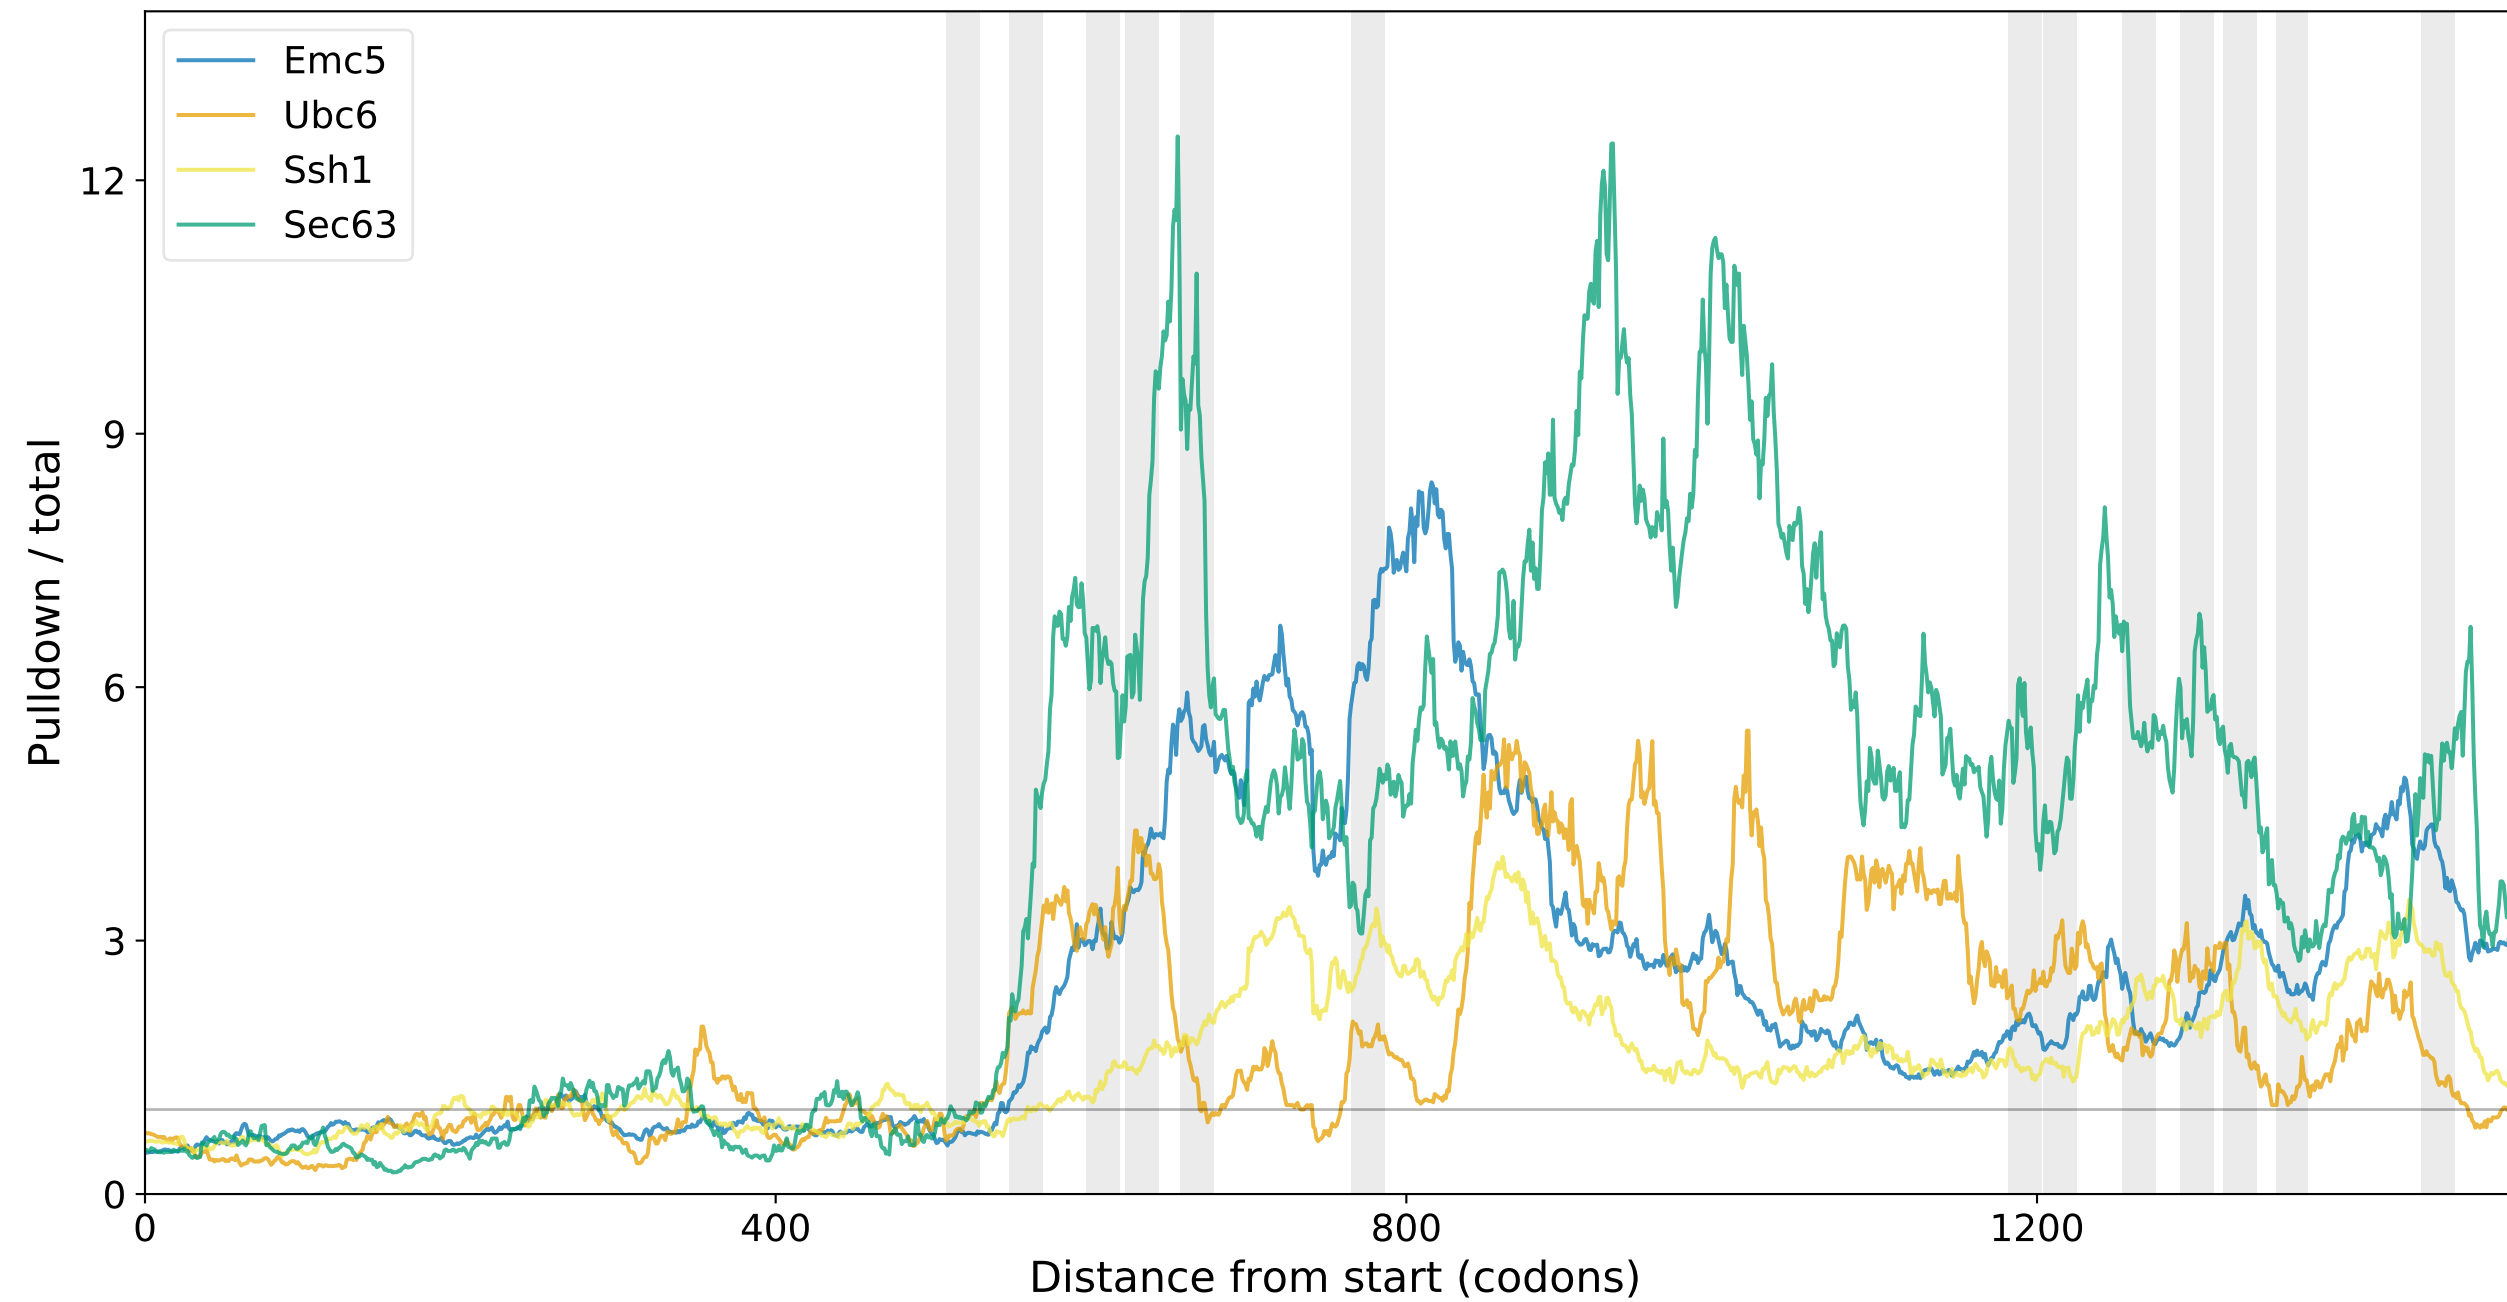

# NUR1

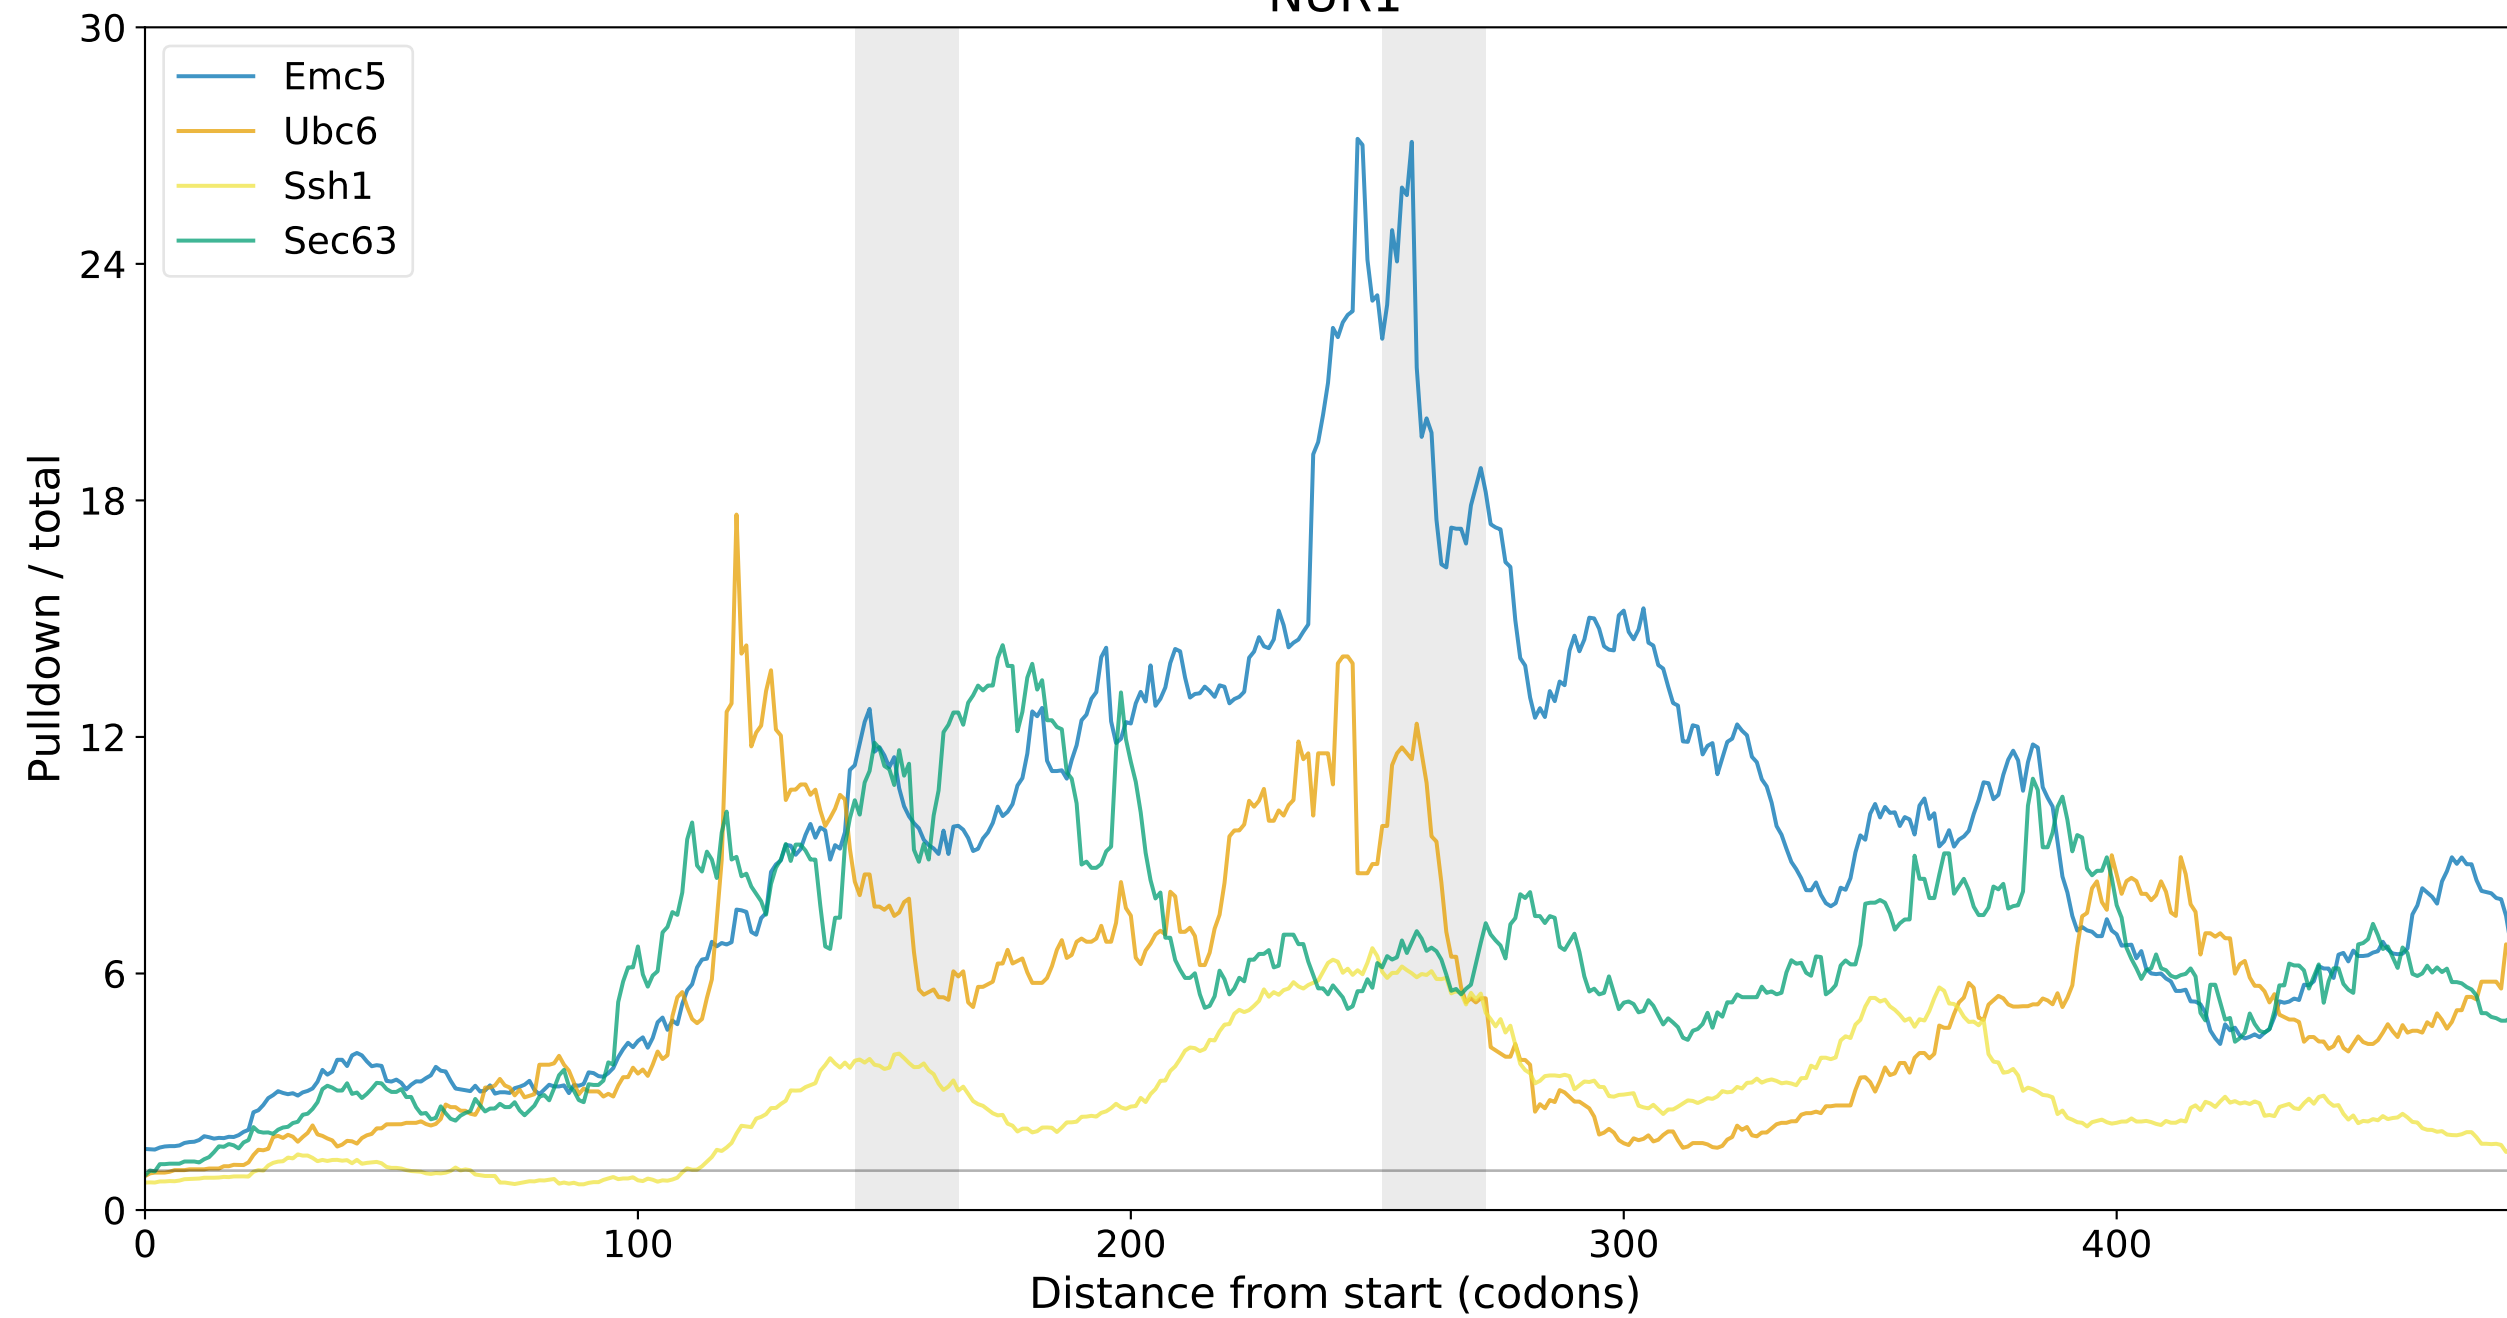

# CHS2

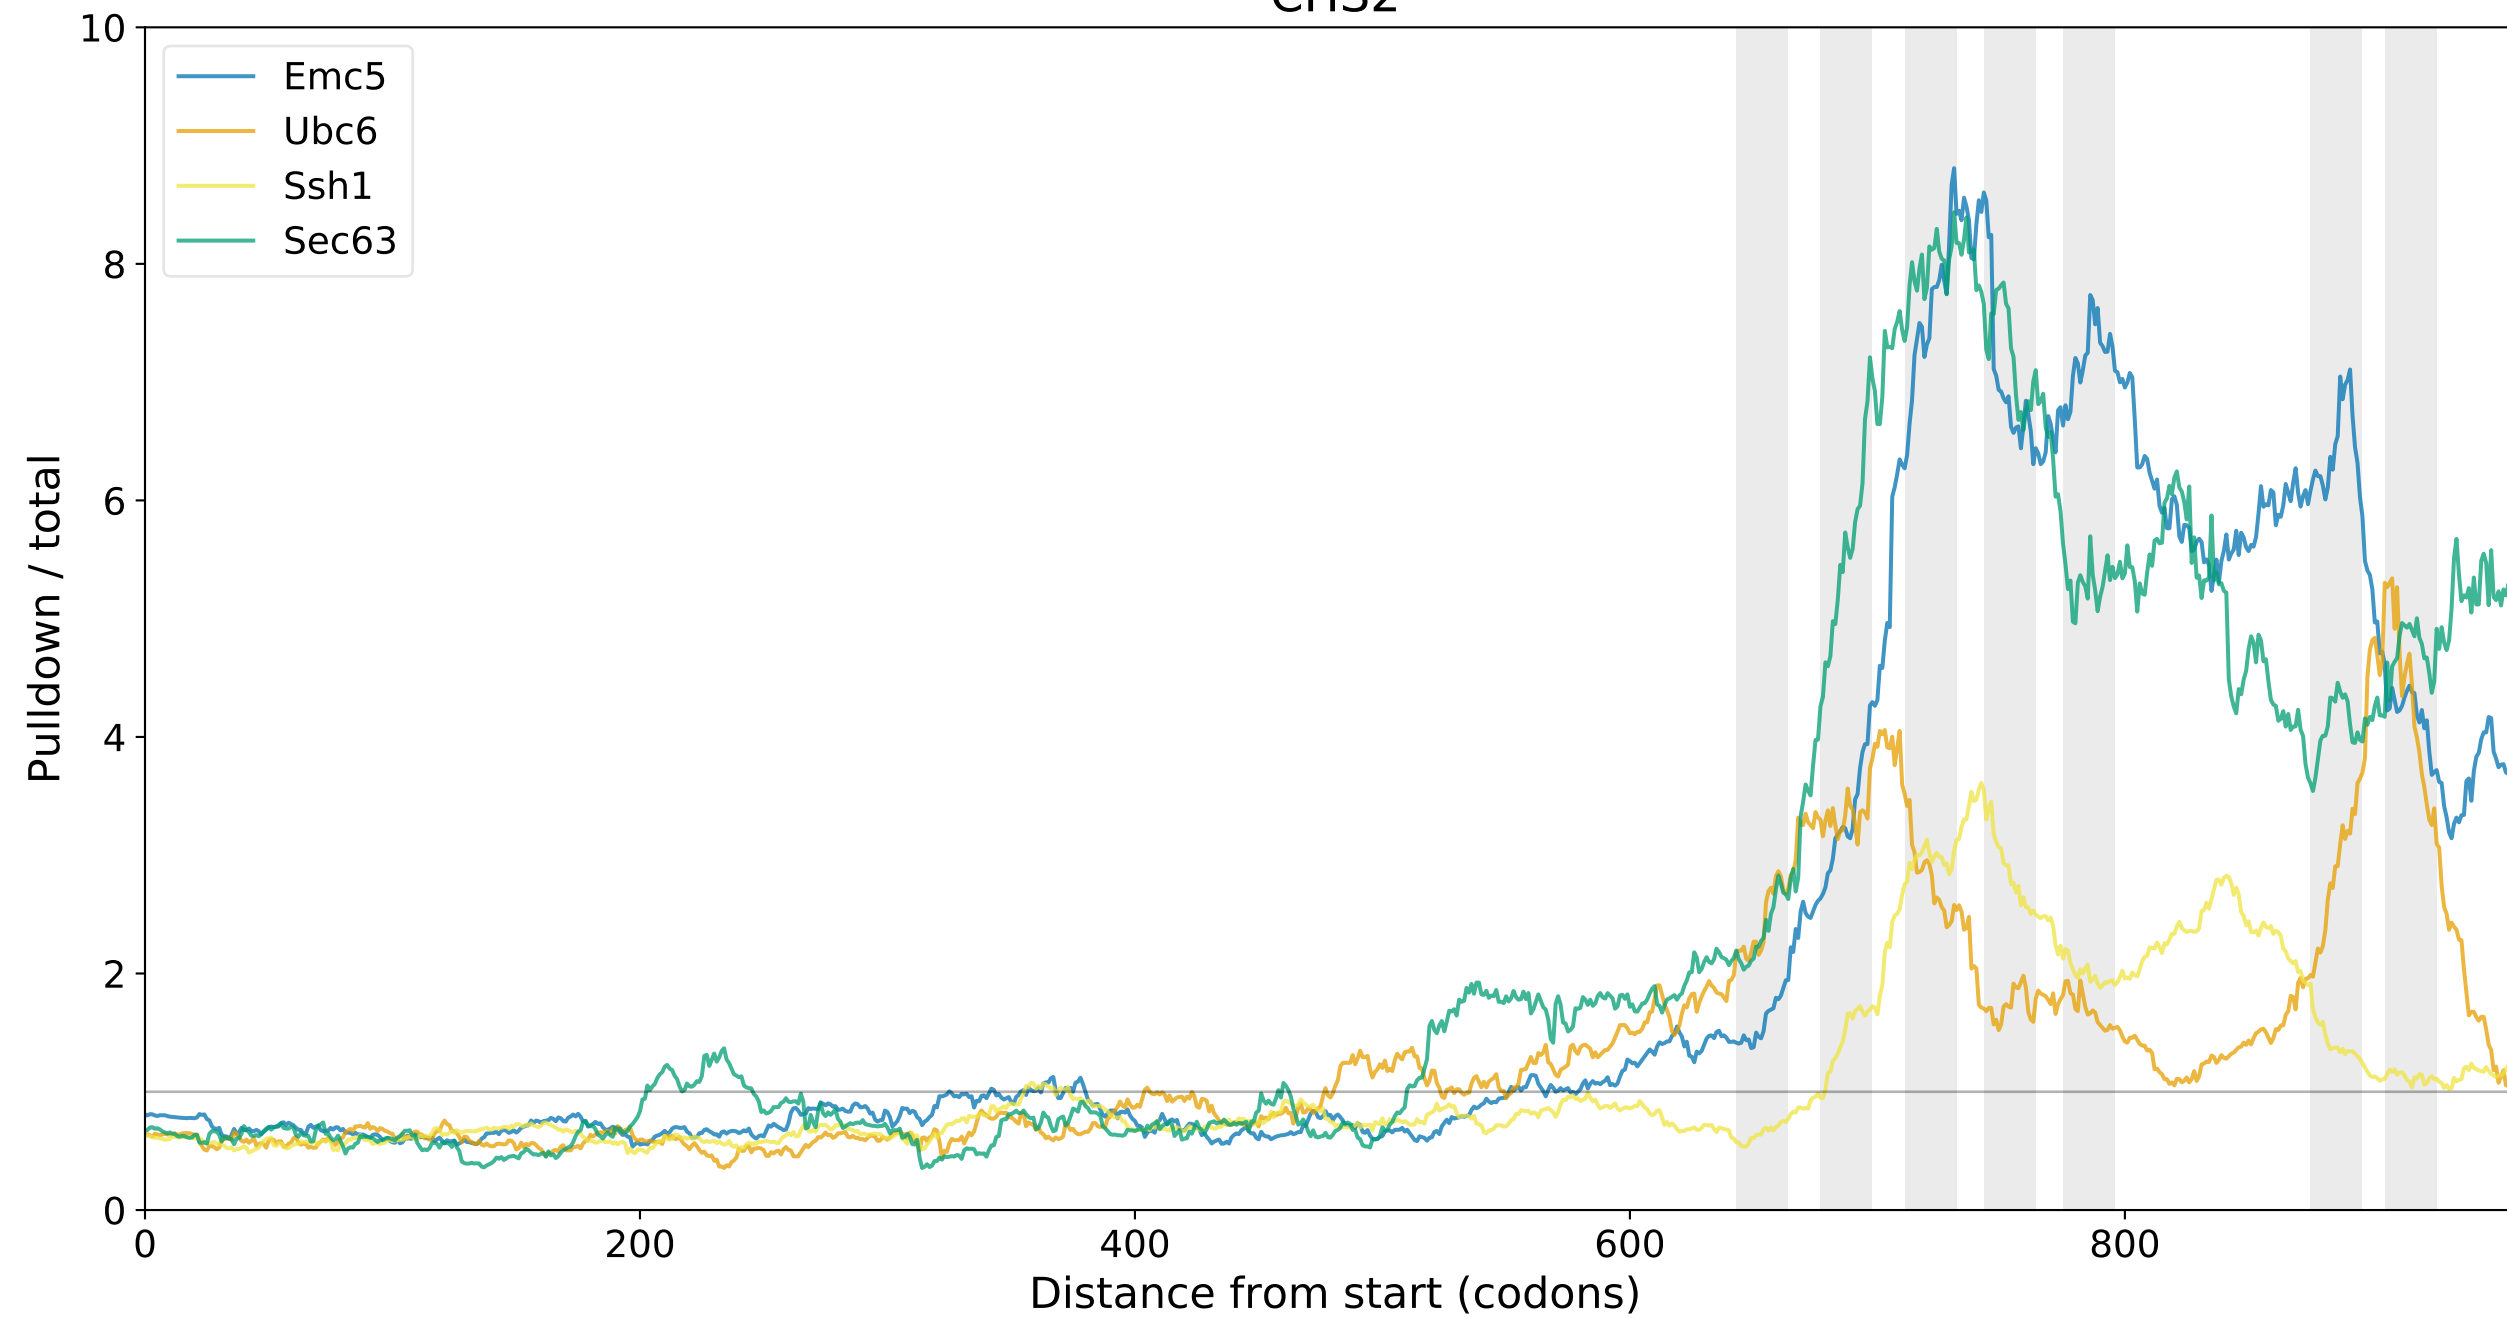



# PEX30

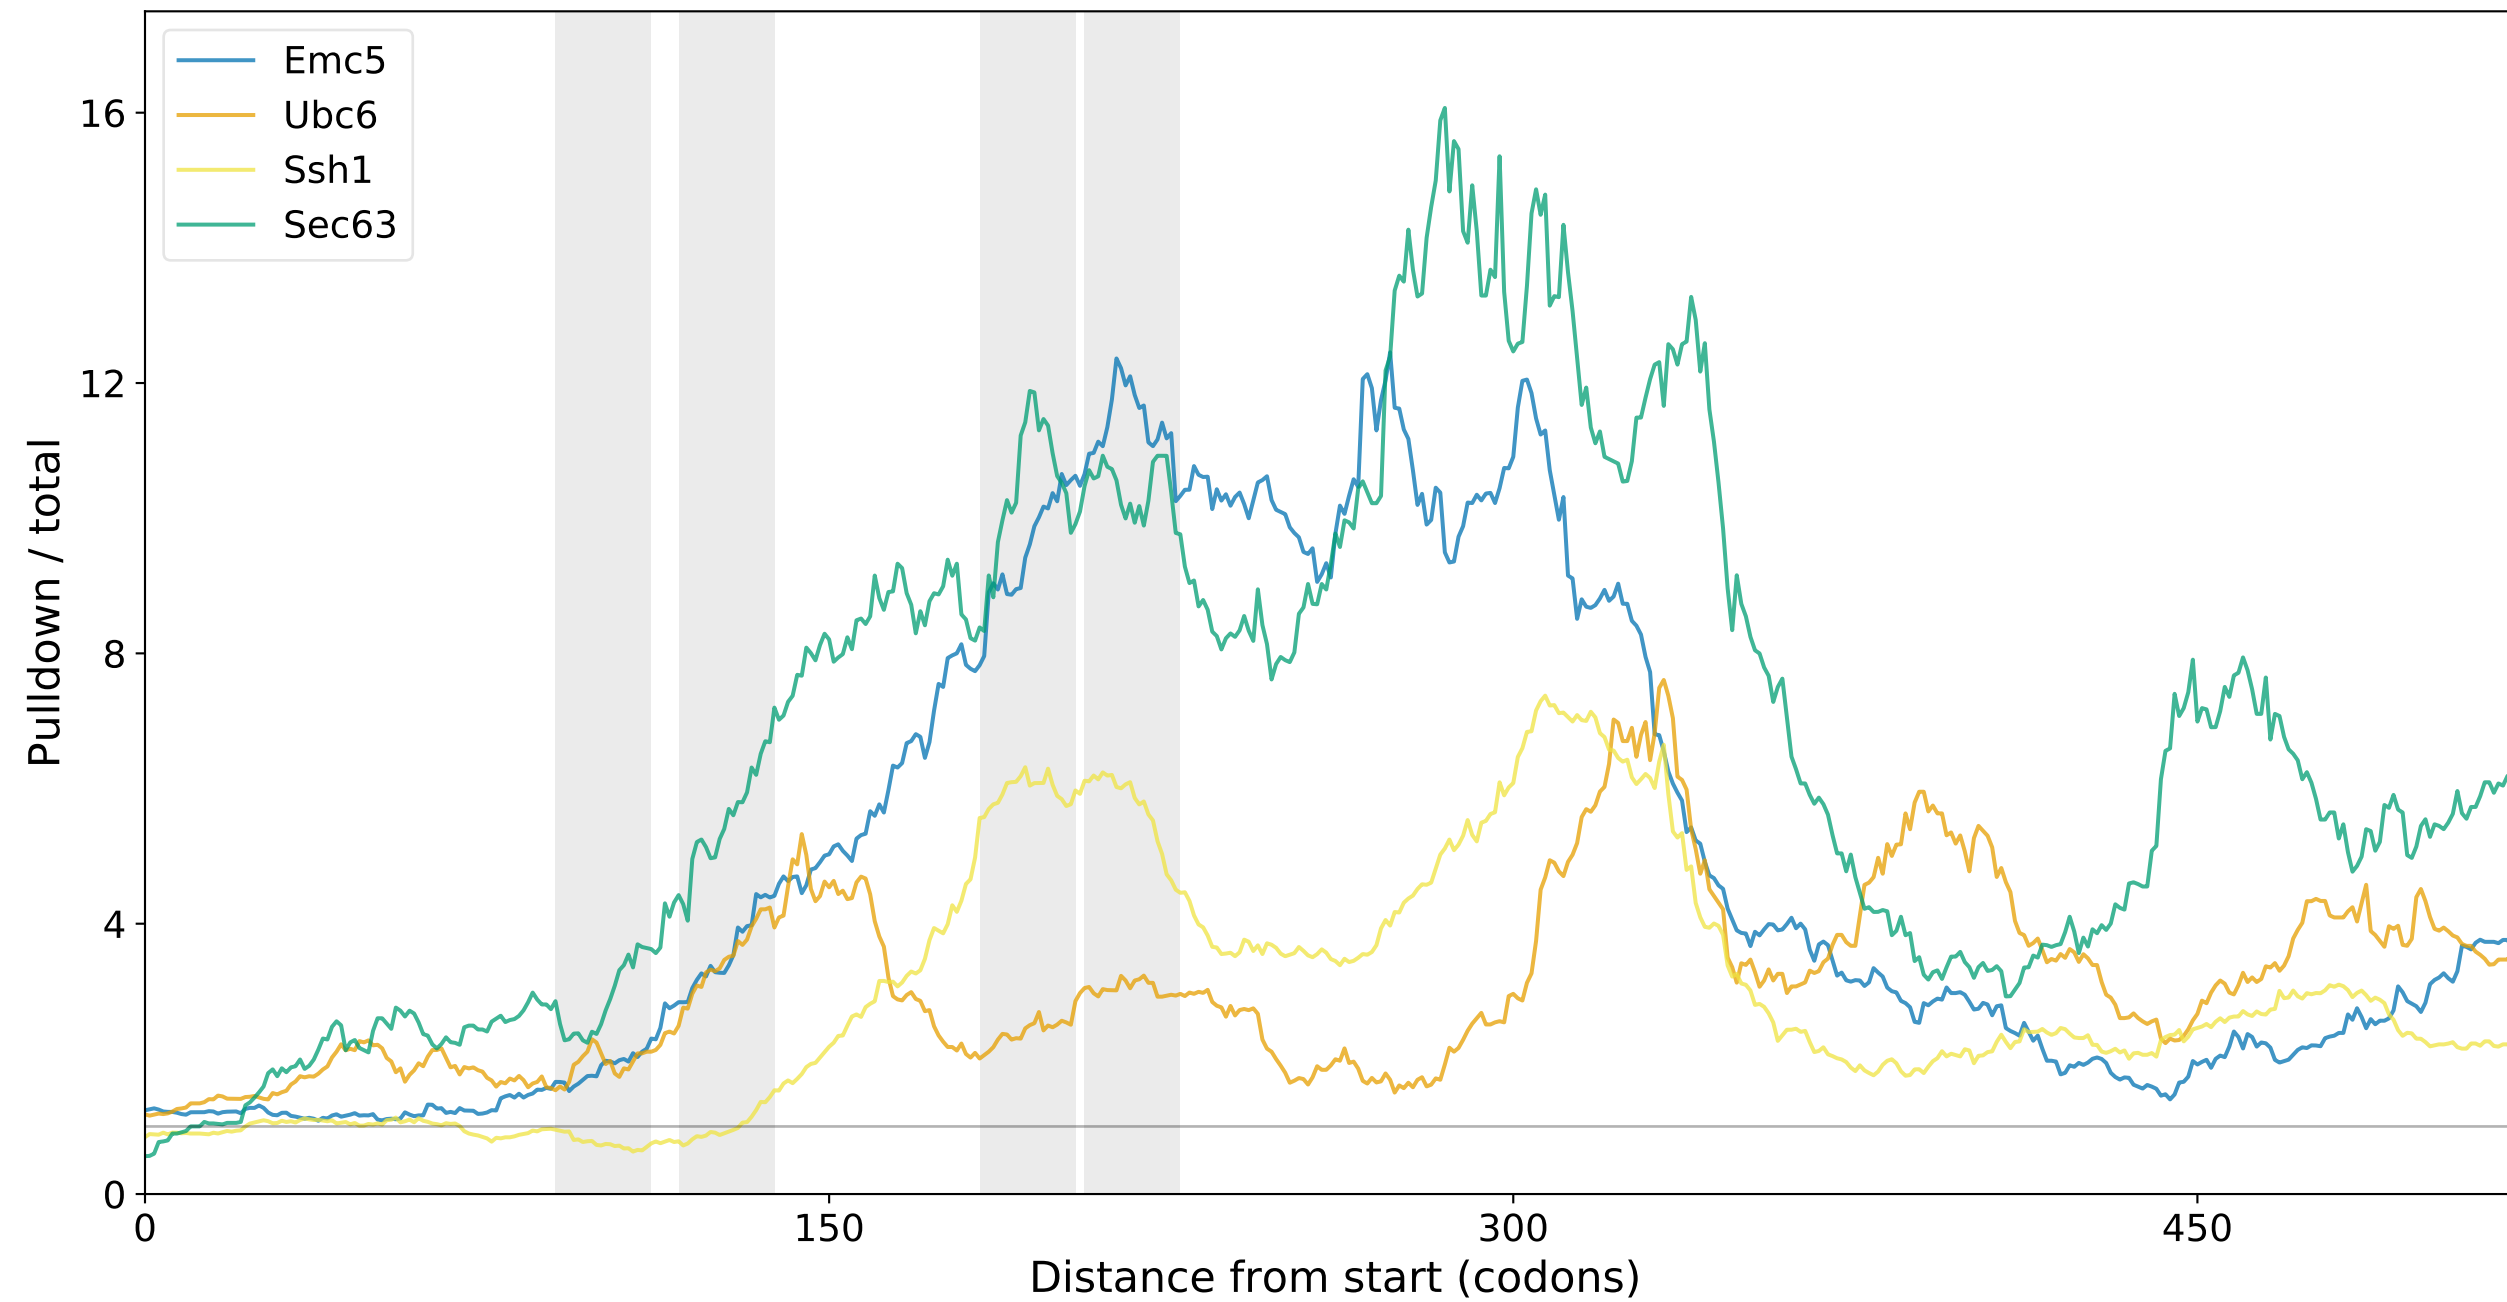

# GPI1

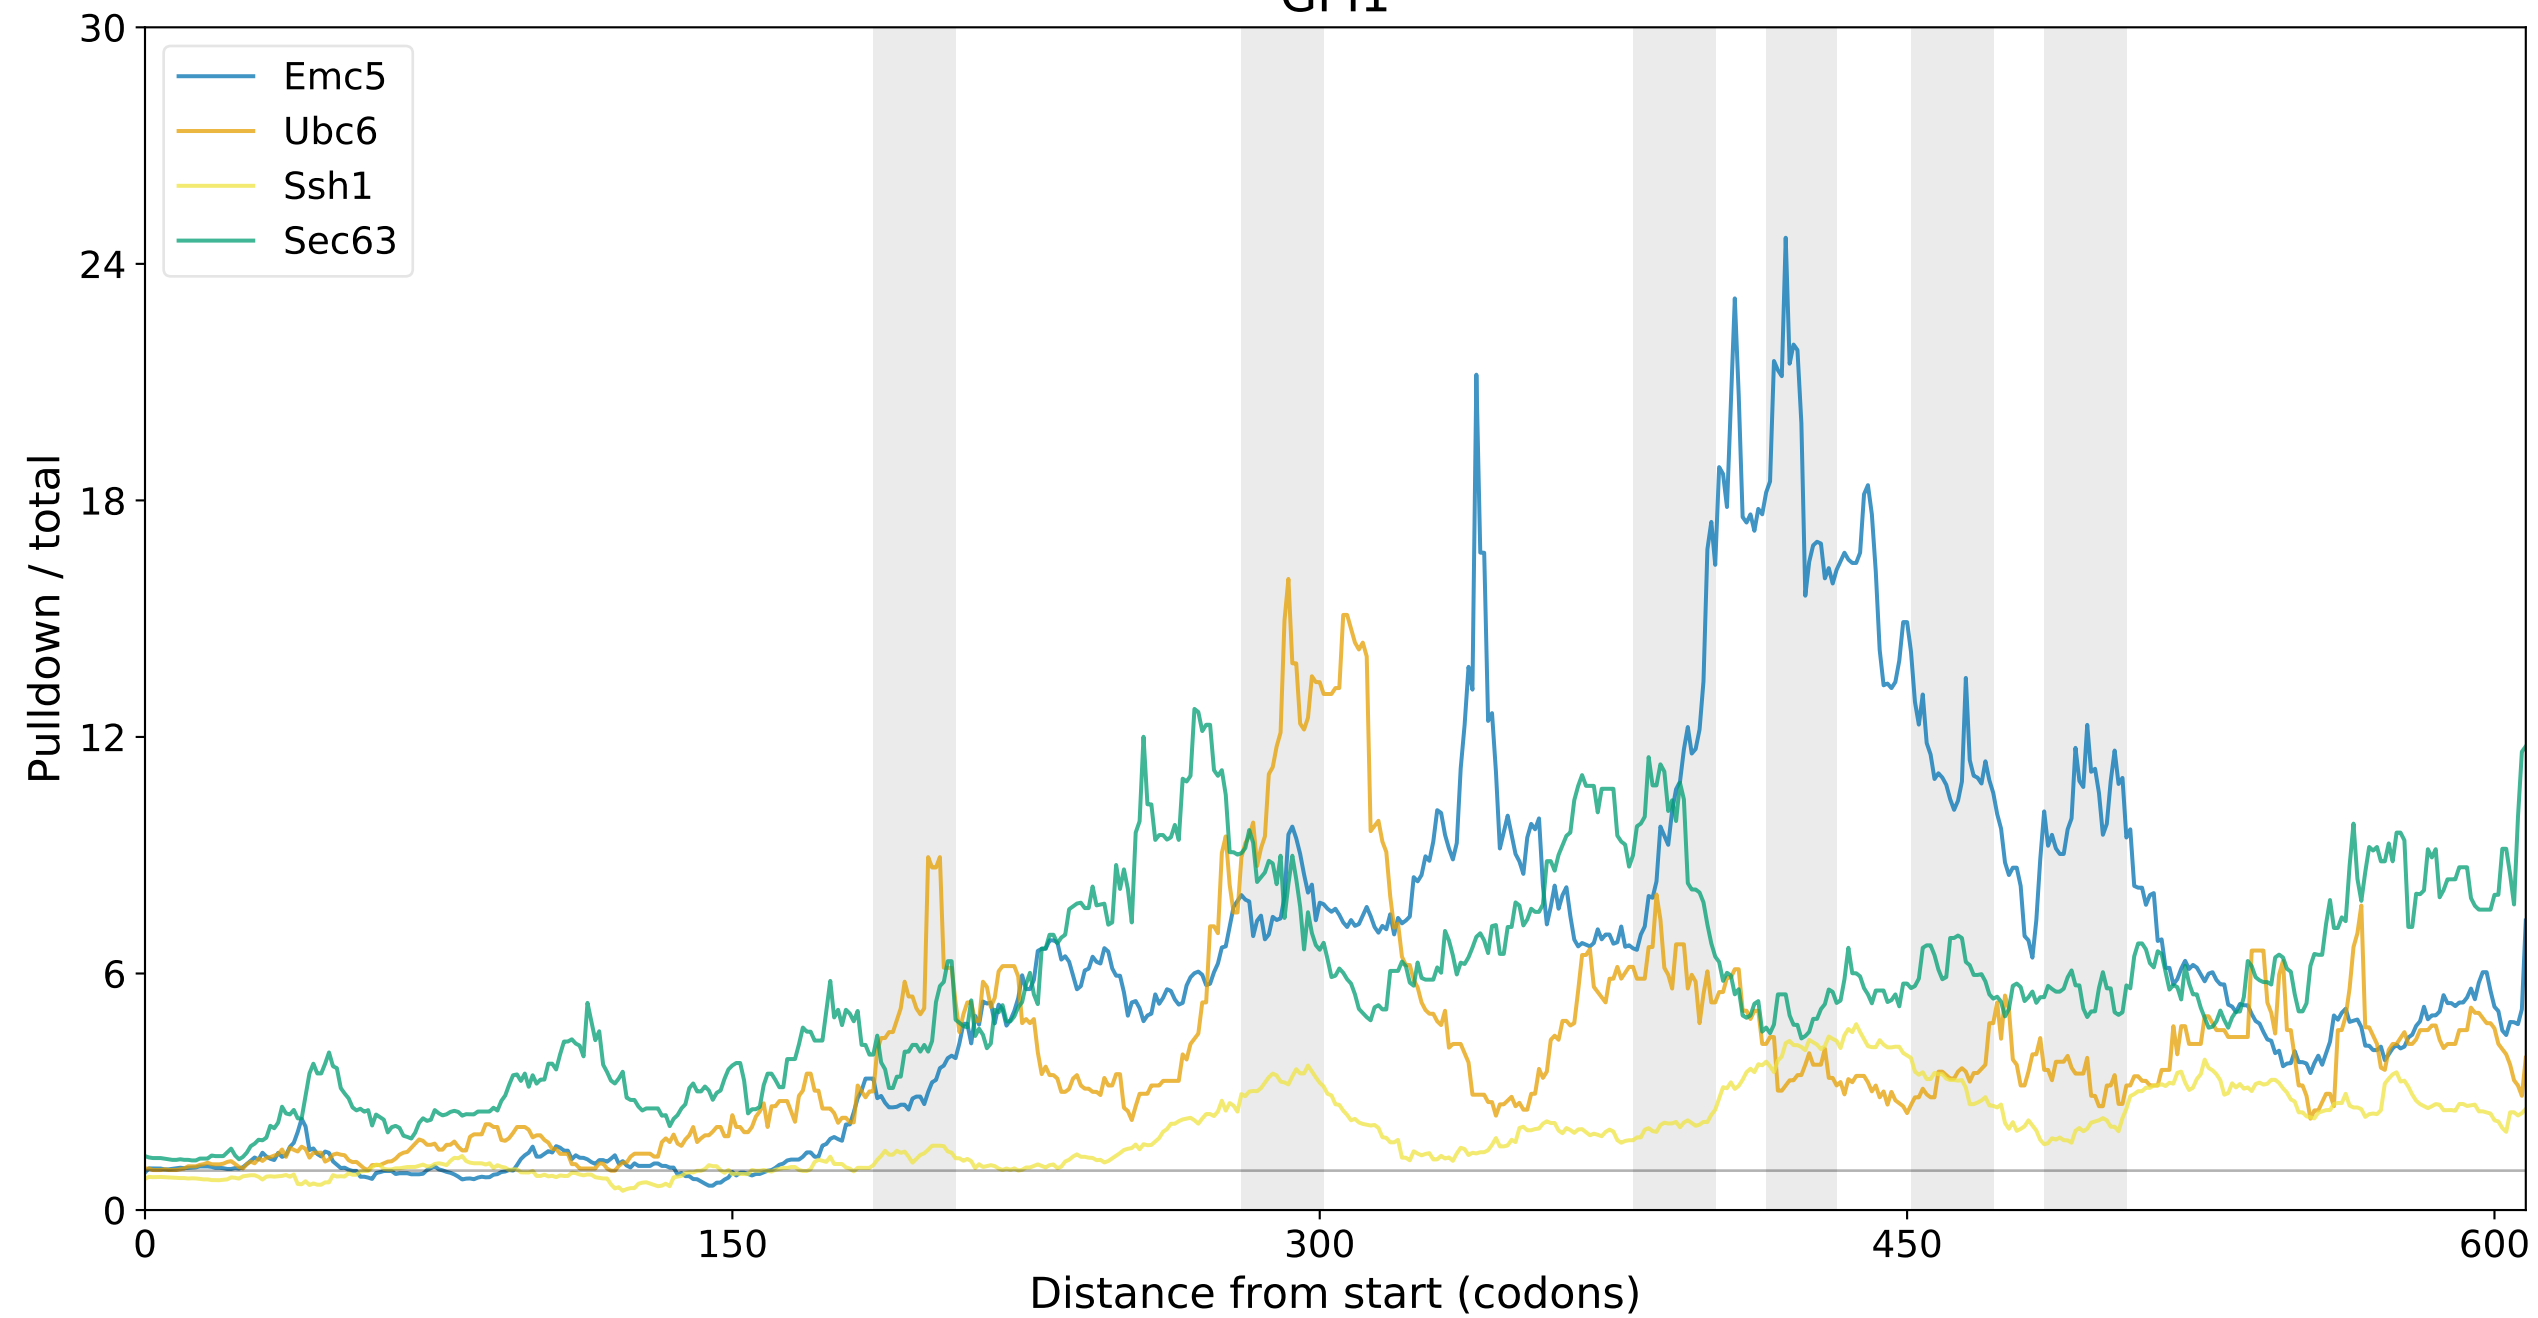

# YGL114W

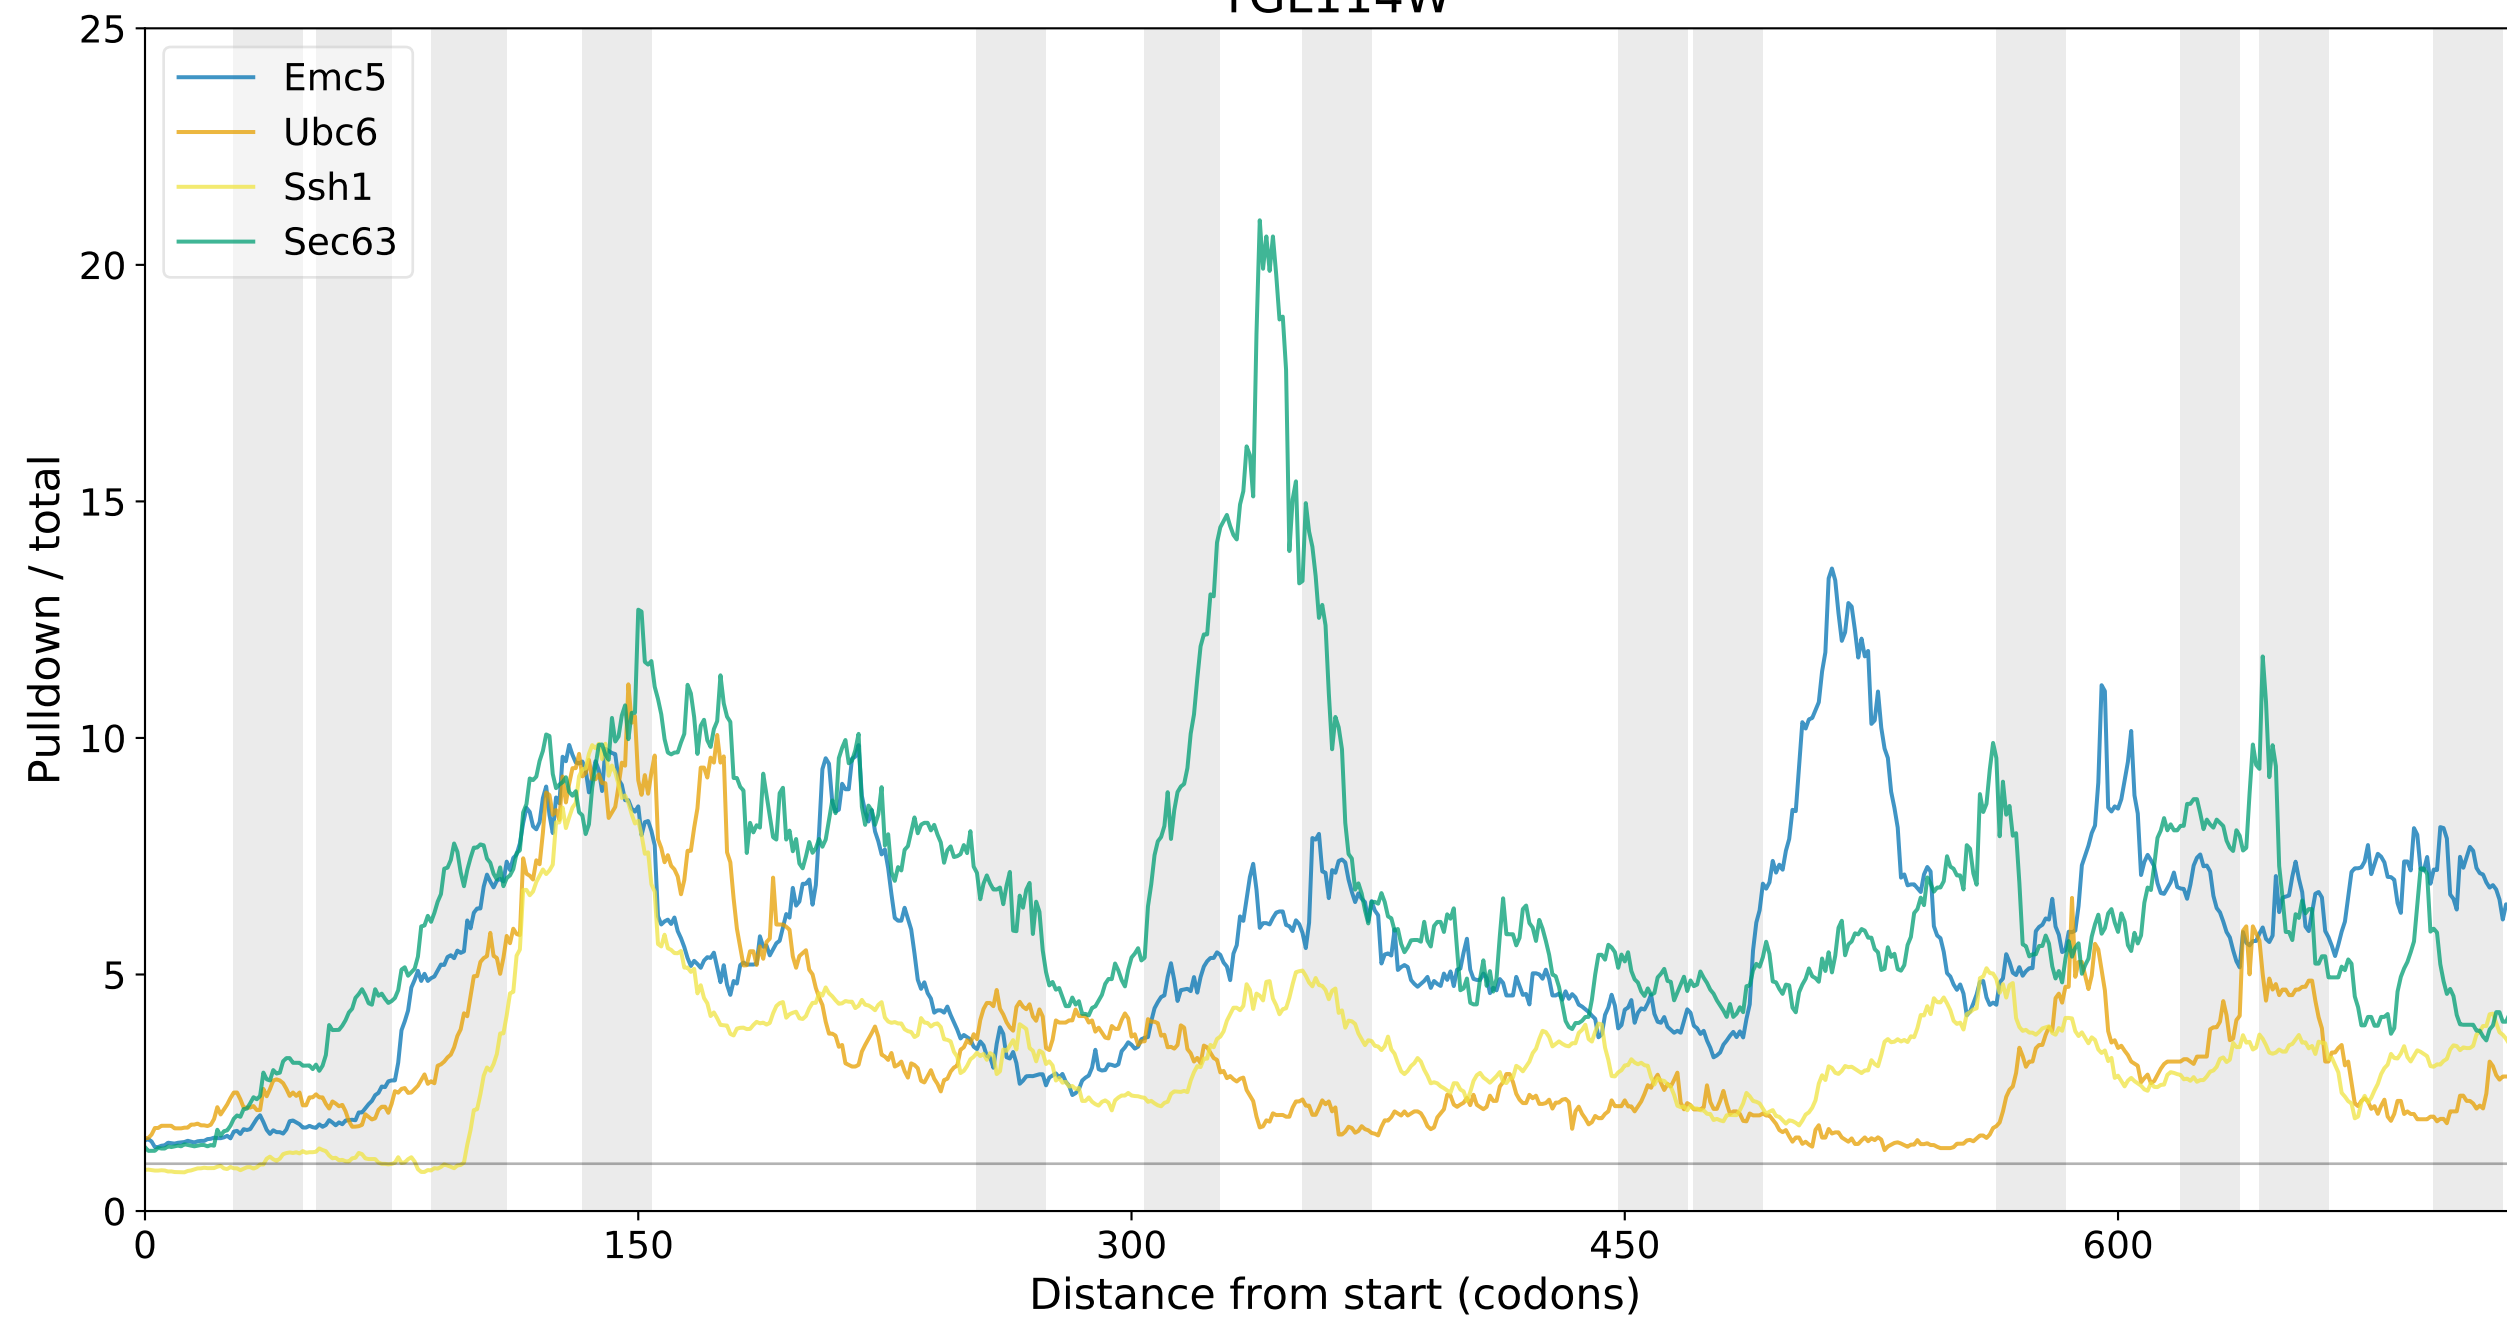

# BPT1

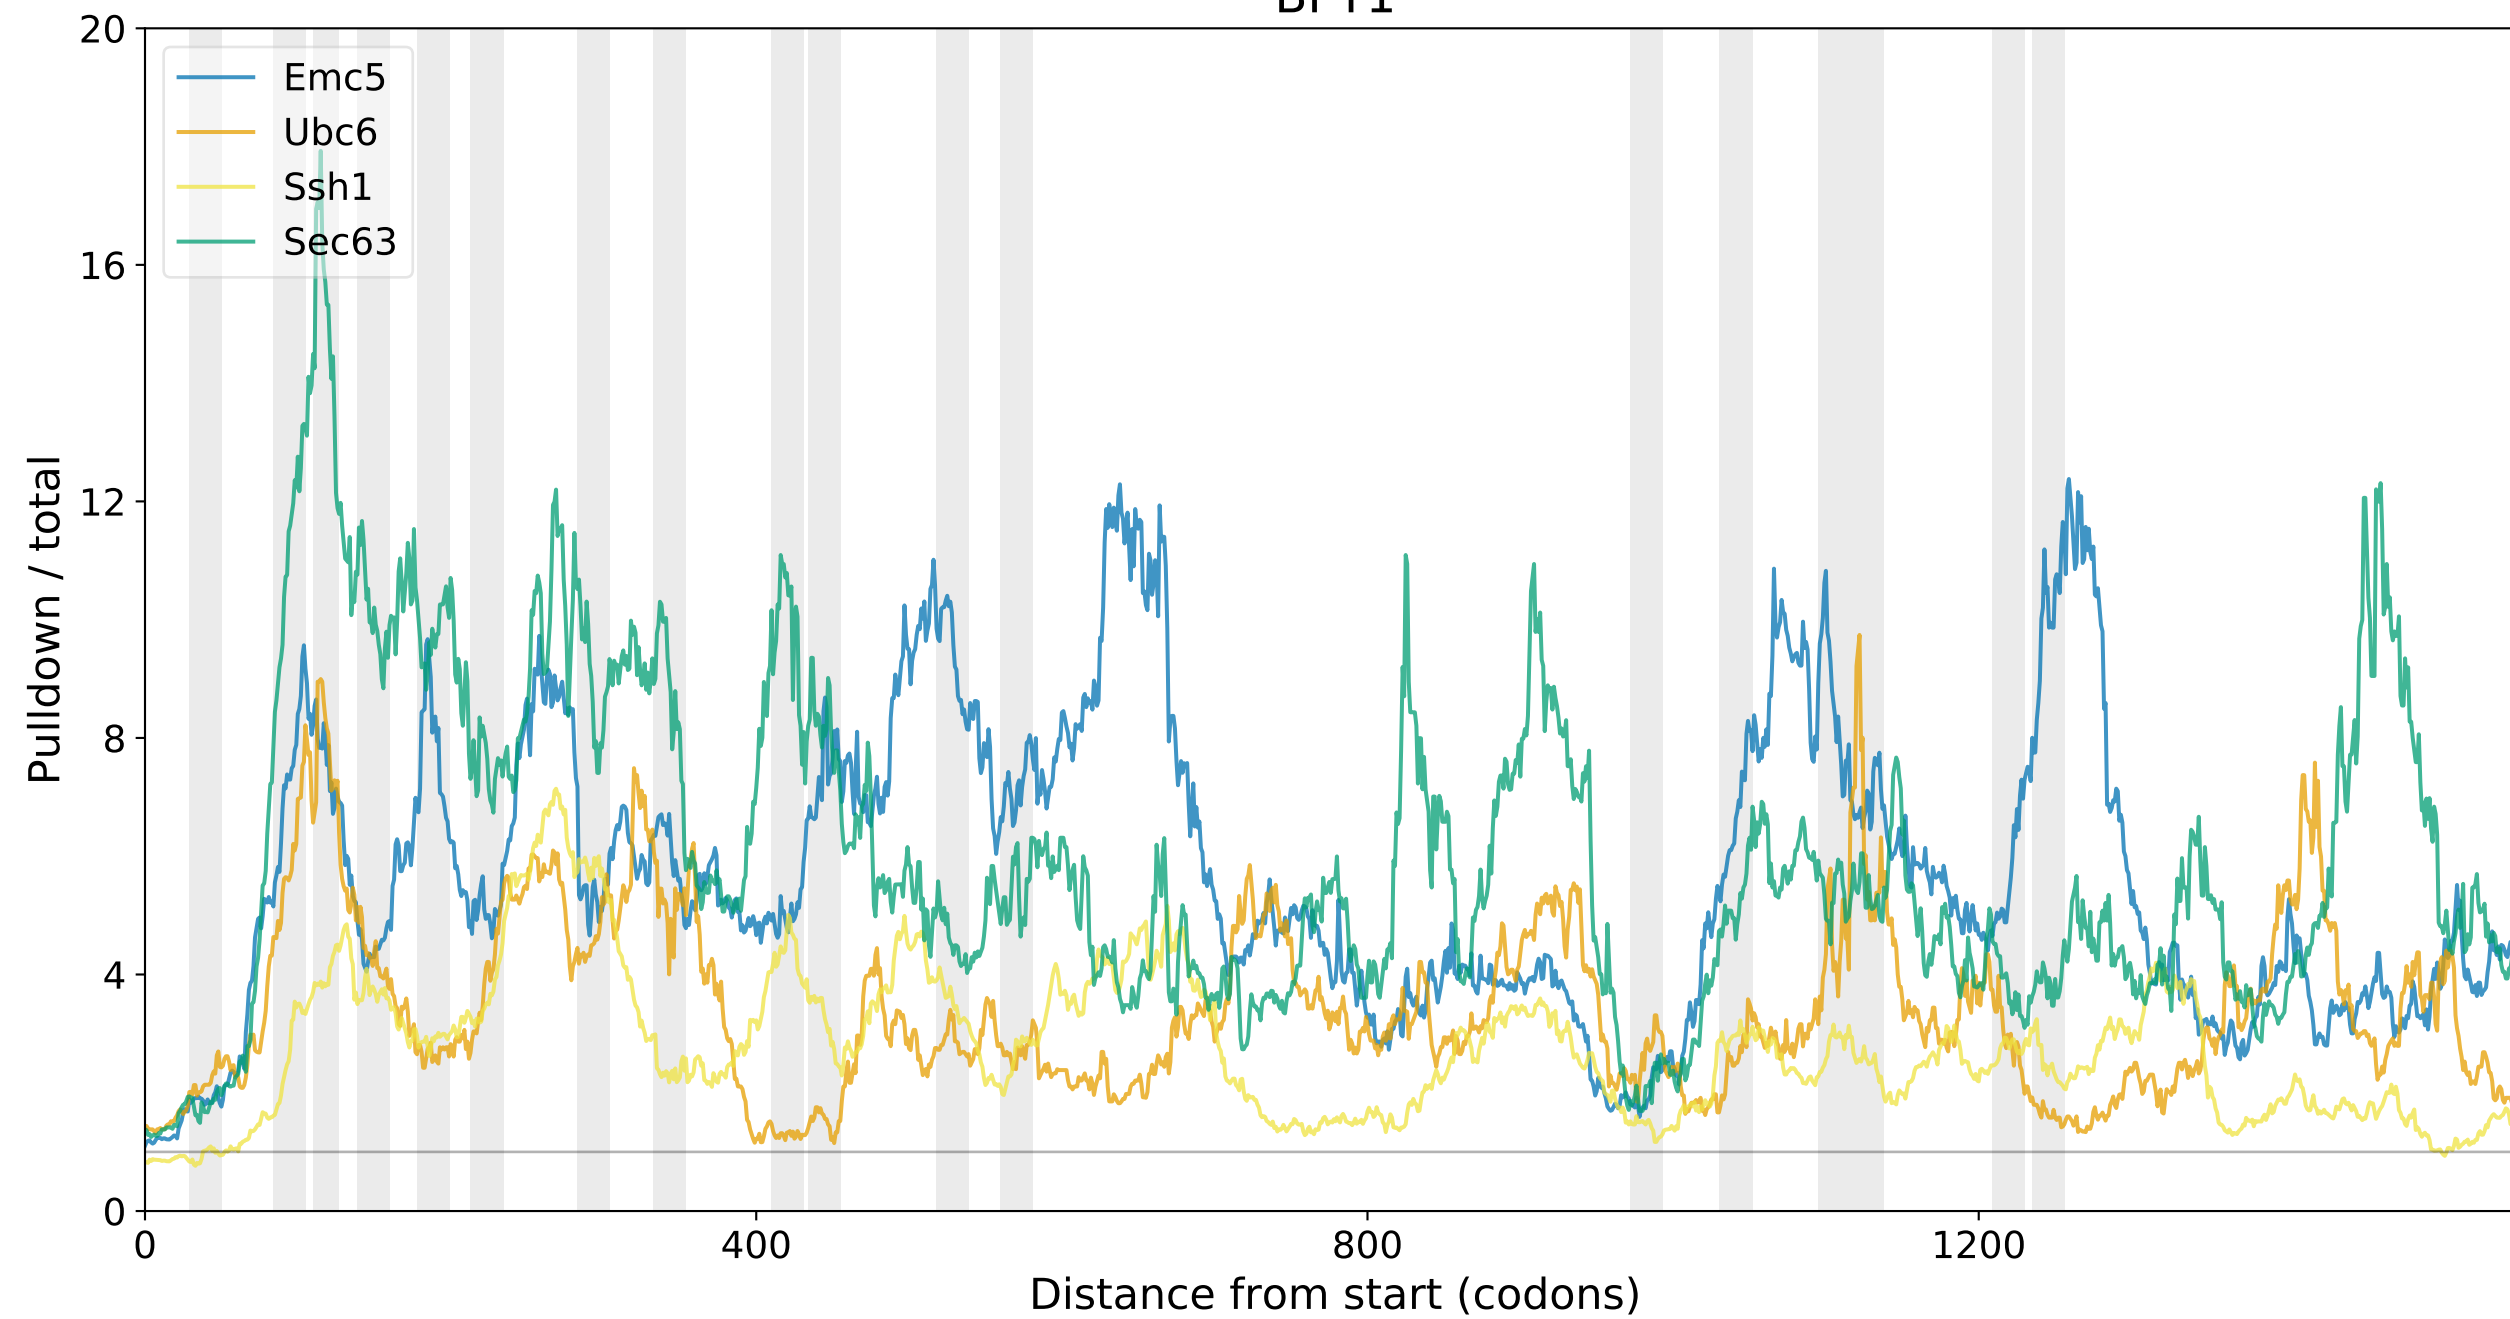

# PMT6

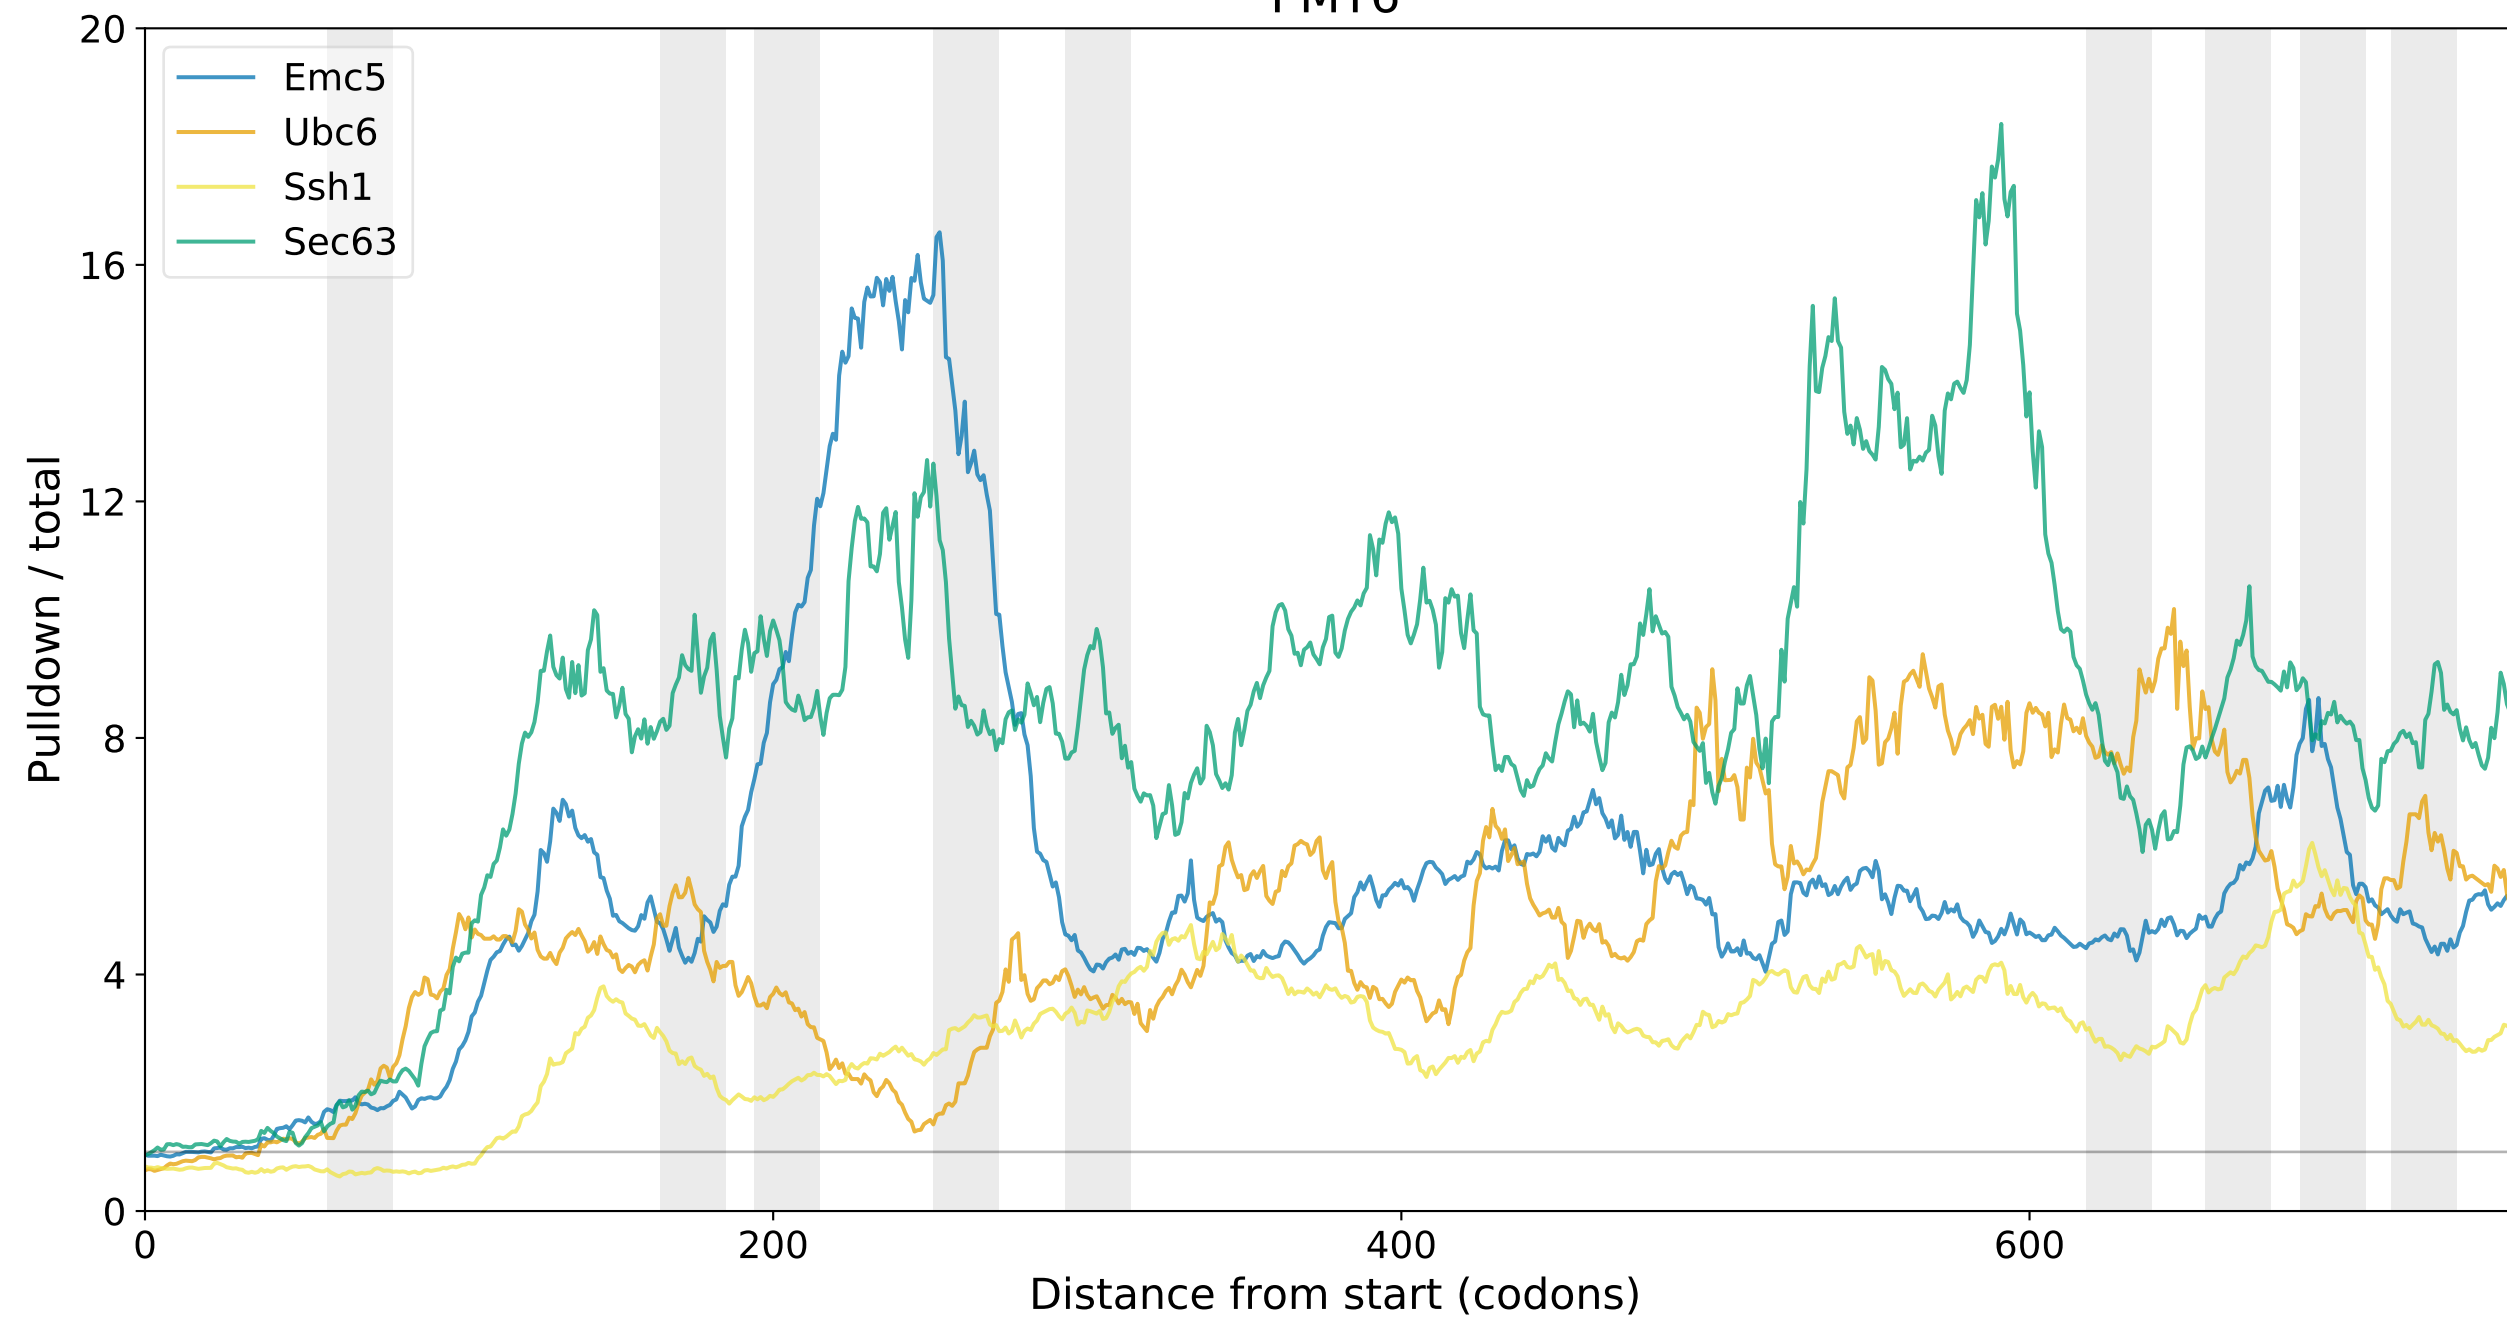

# SNQ2

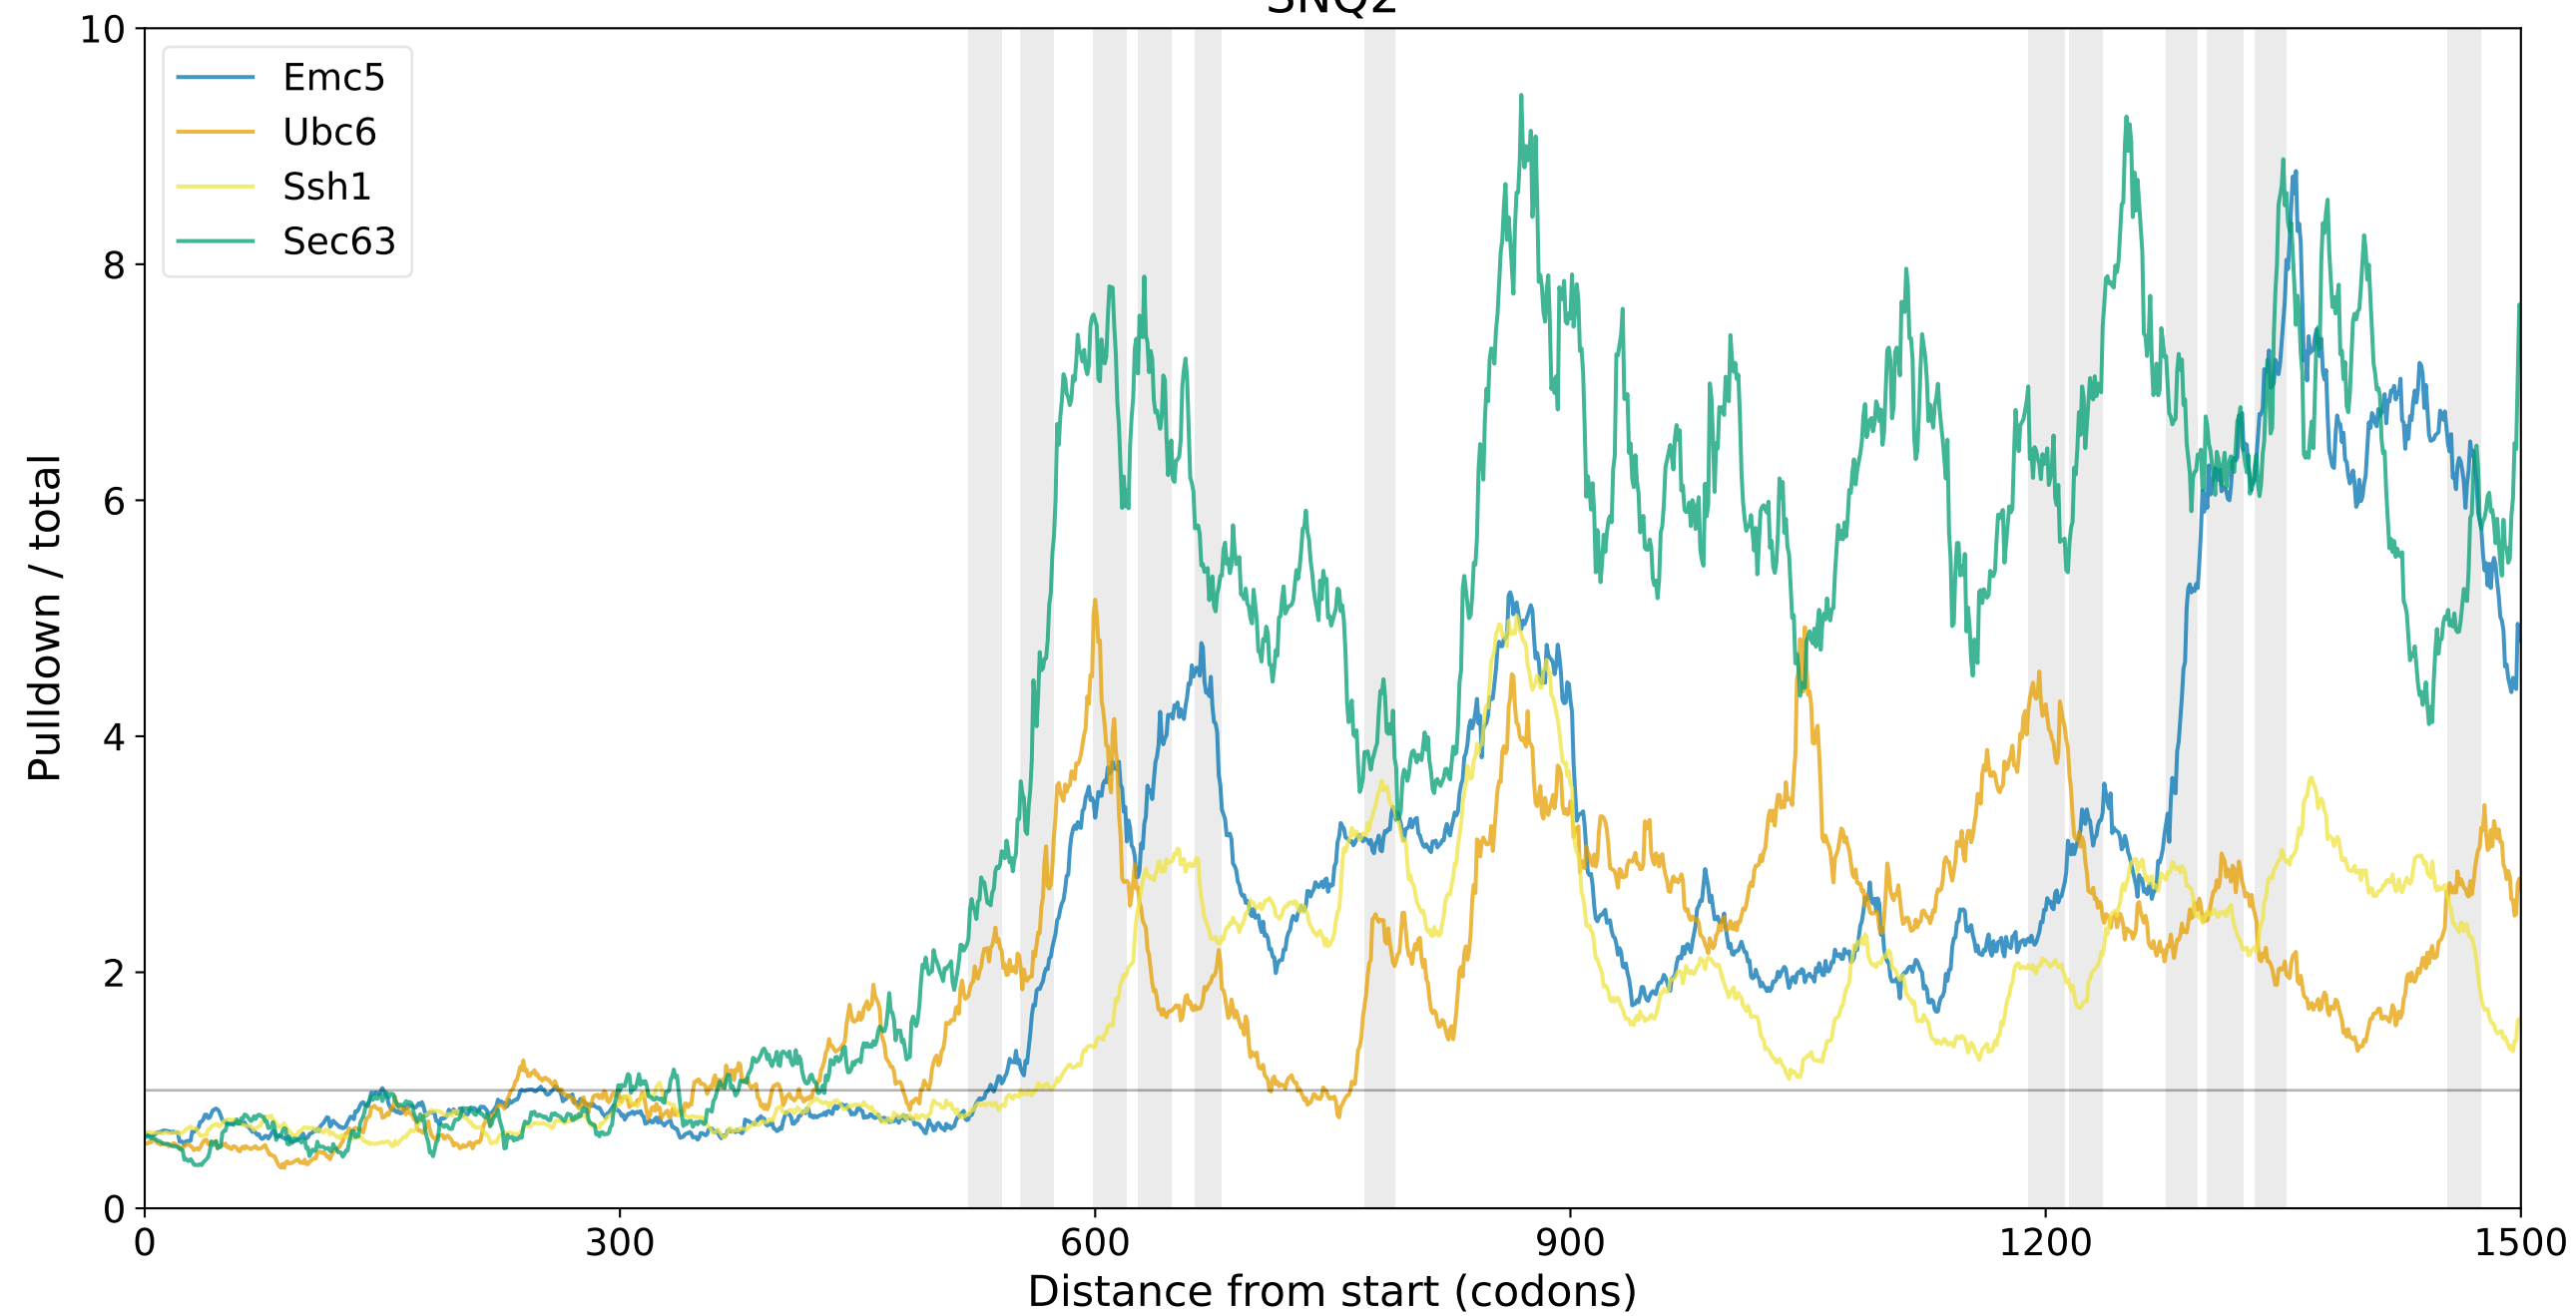

## DRS2

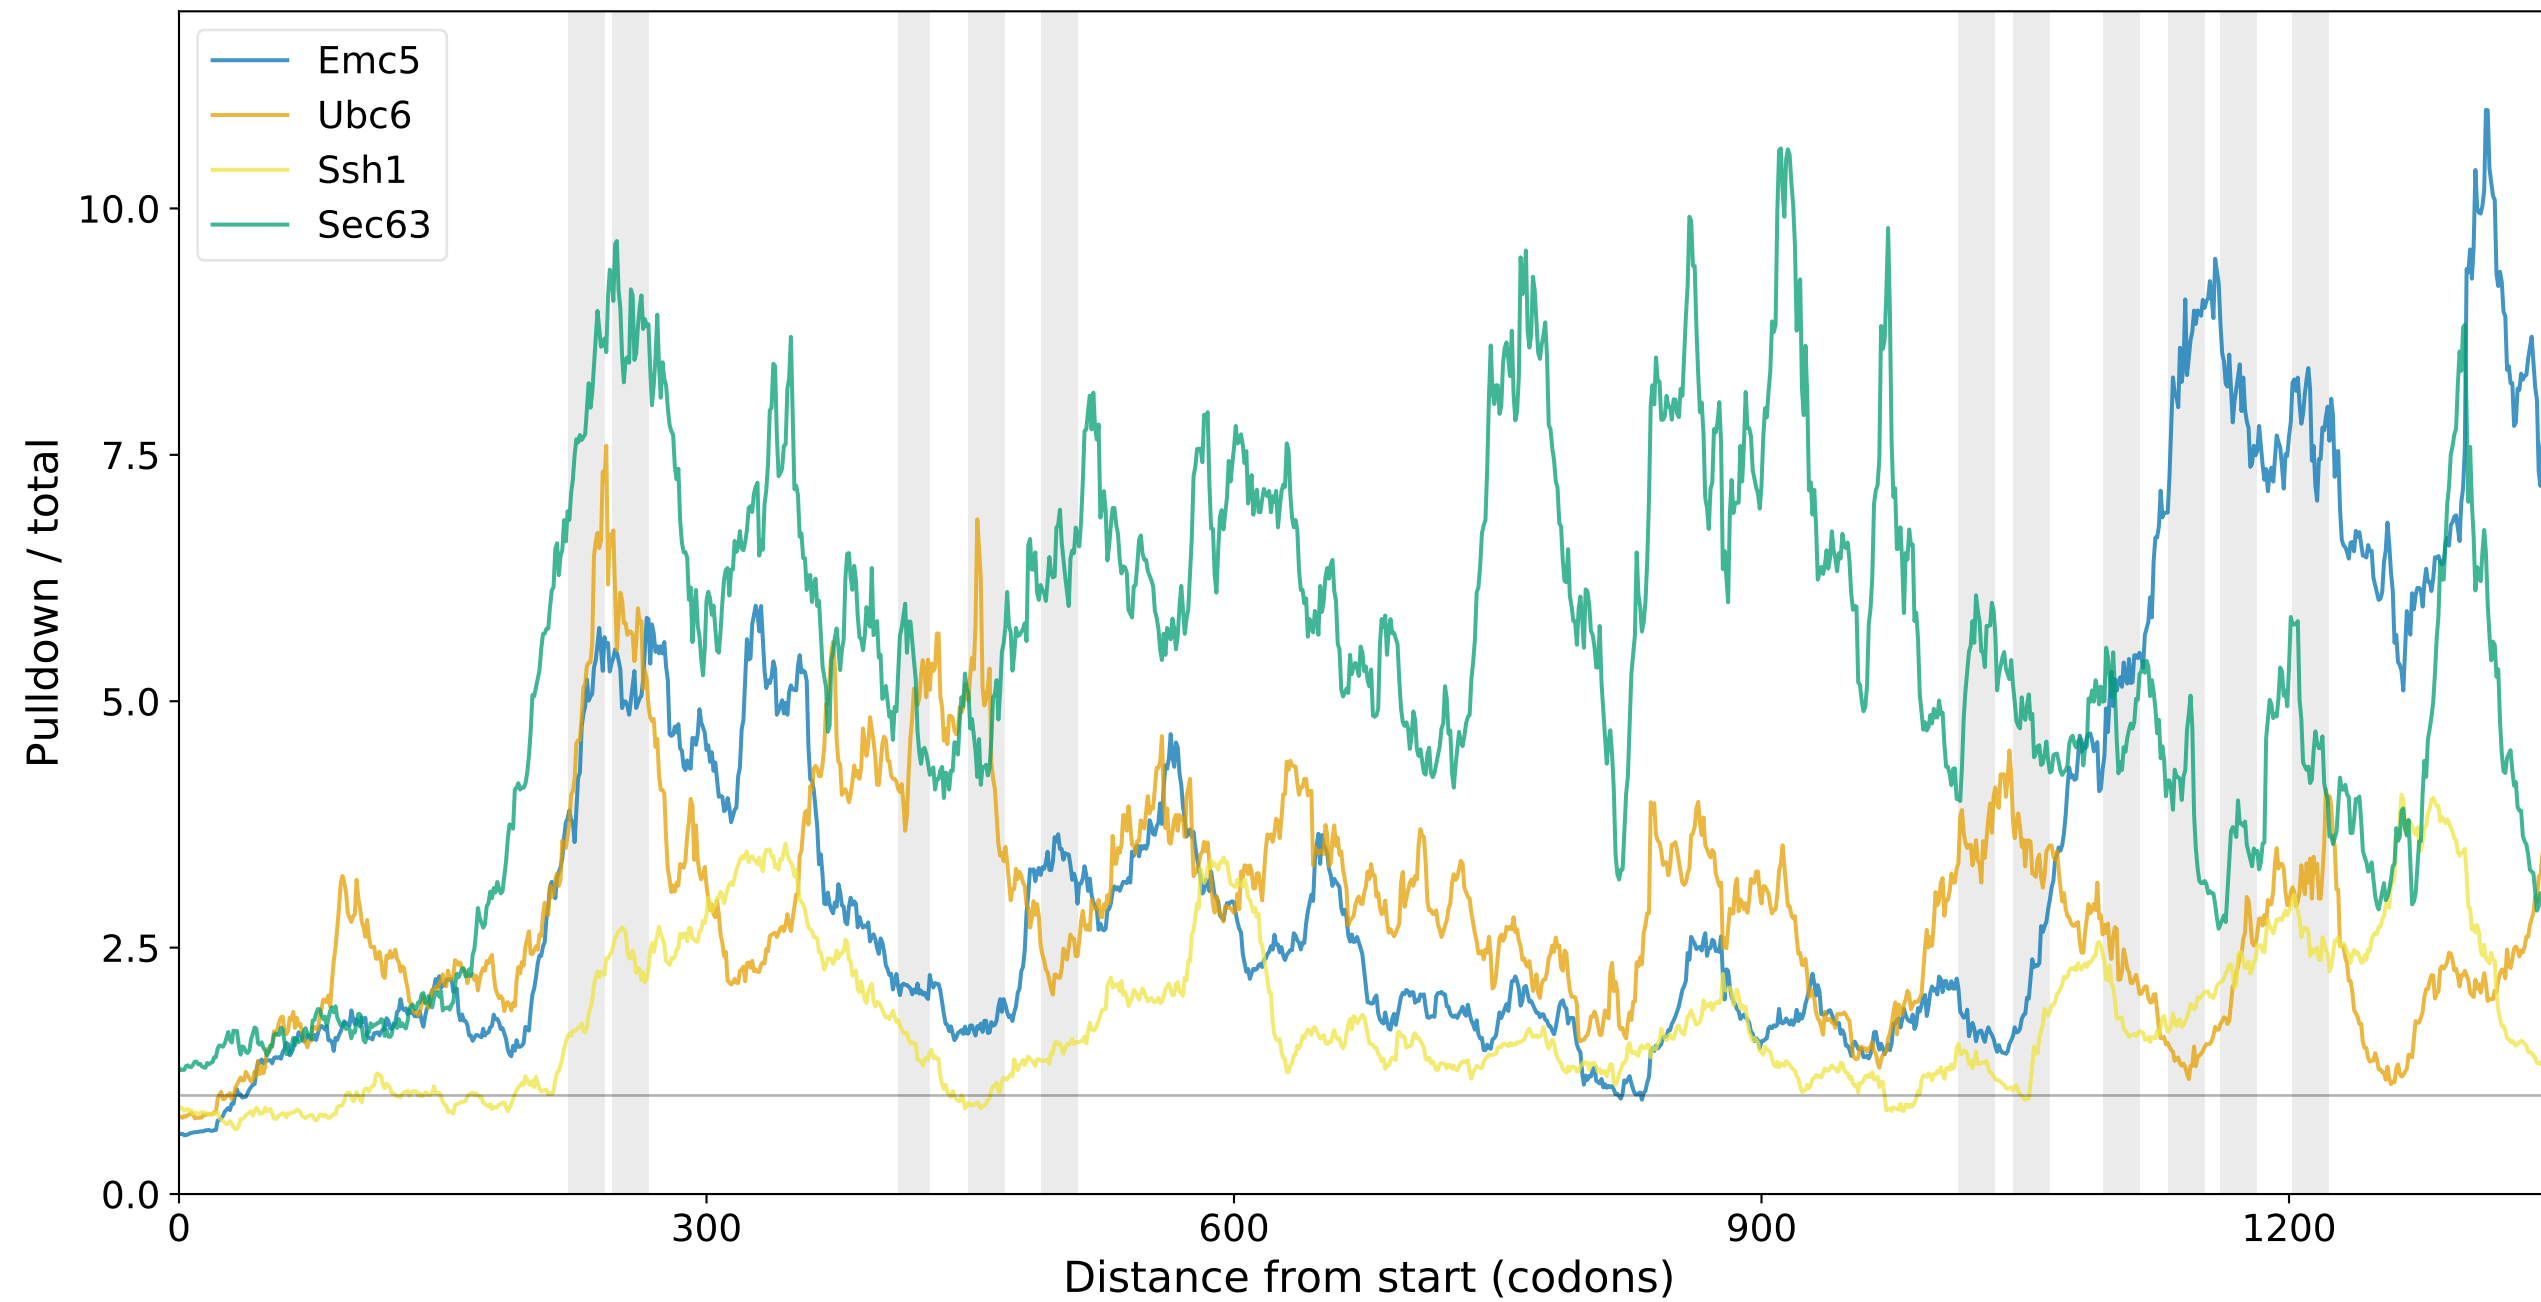

# LCB3

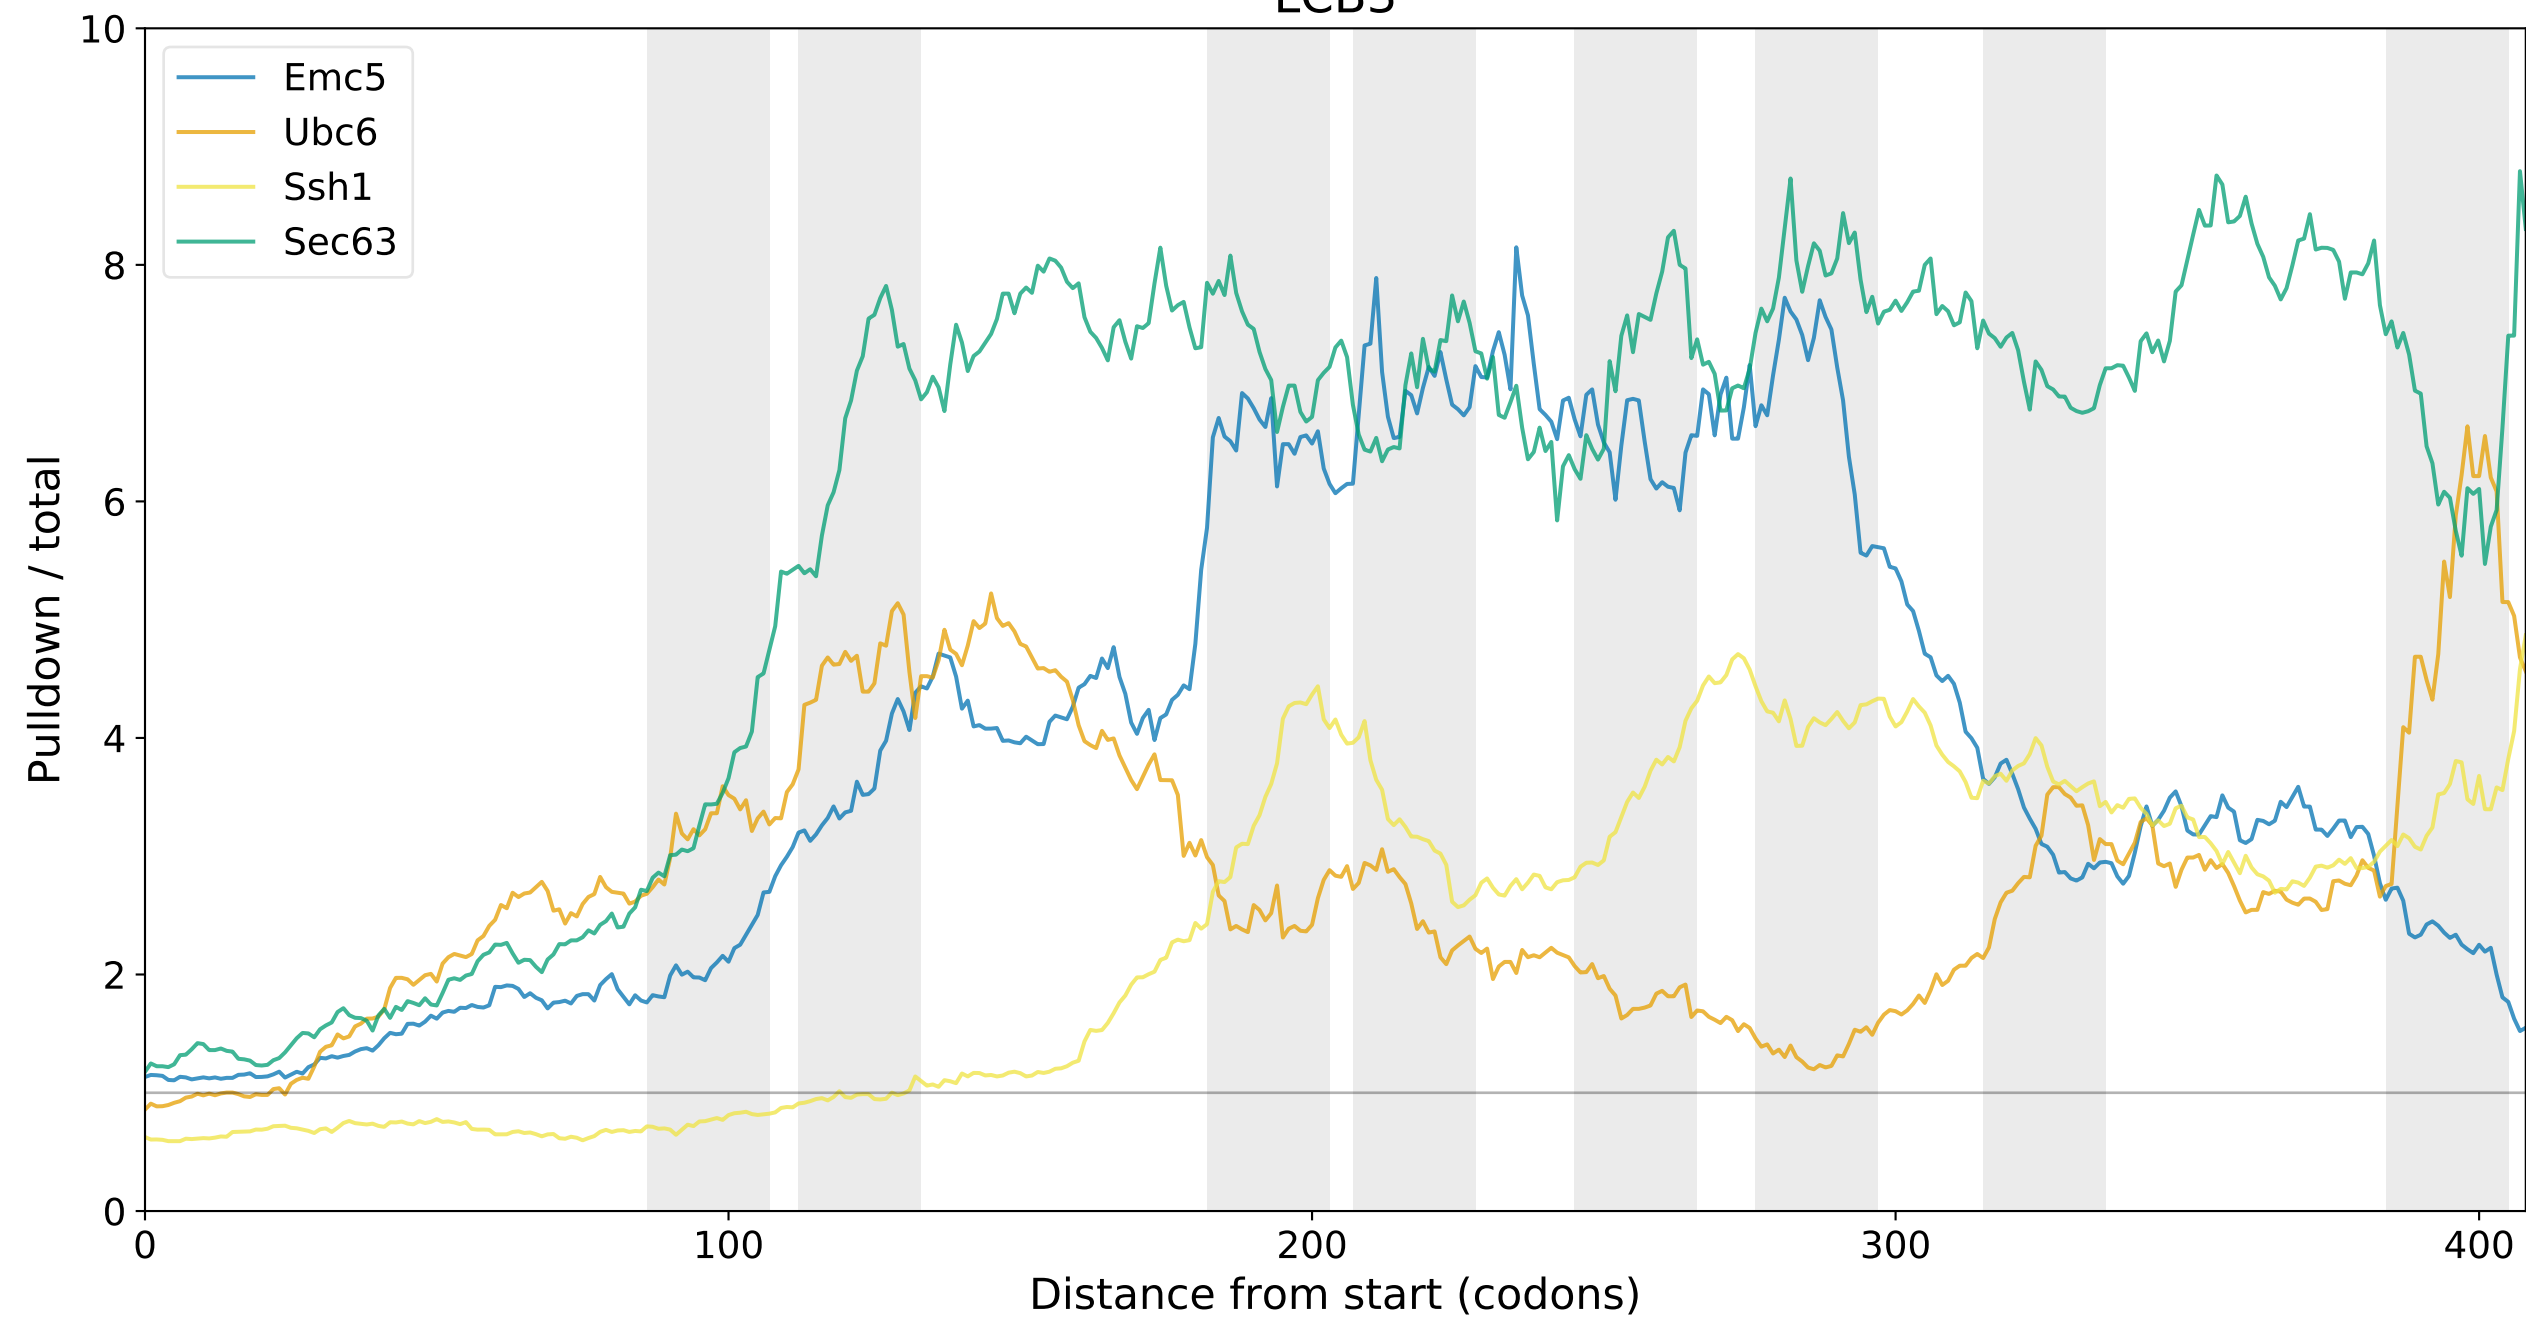



# YOR1

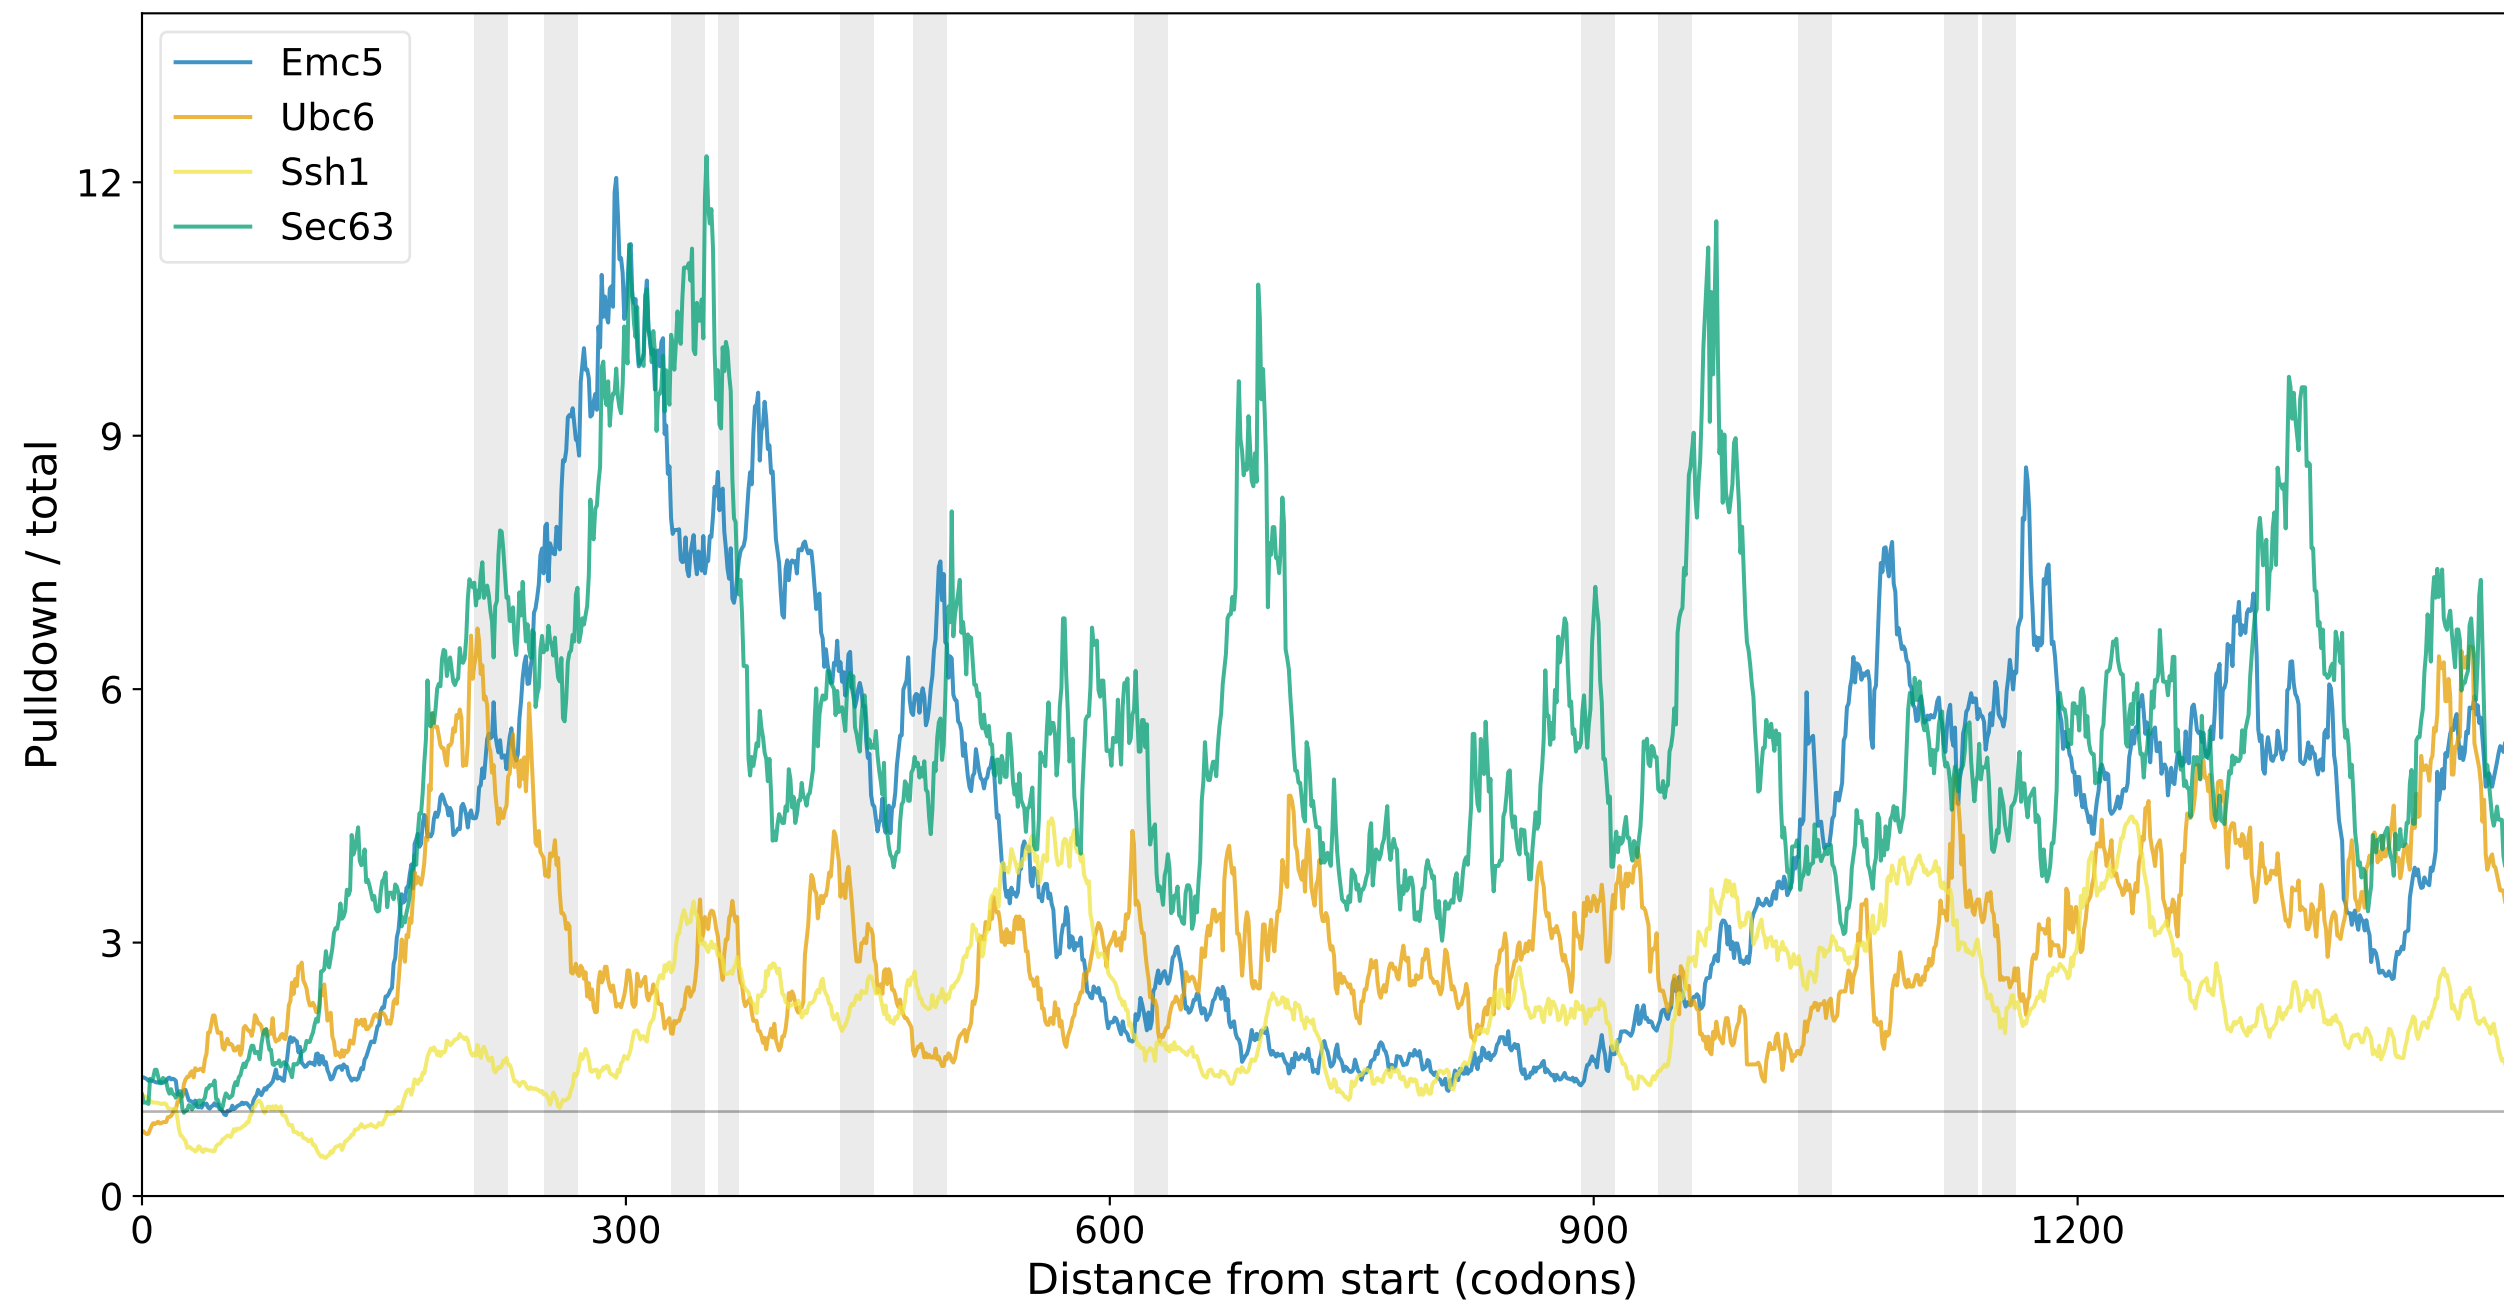

# SUL2

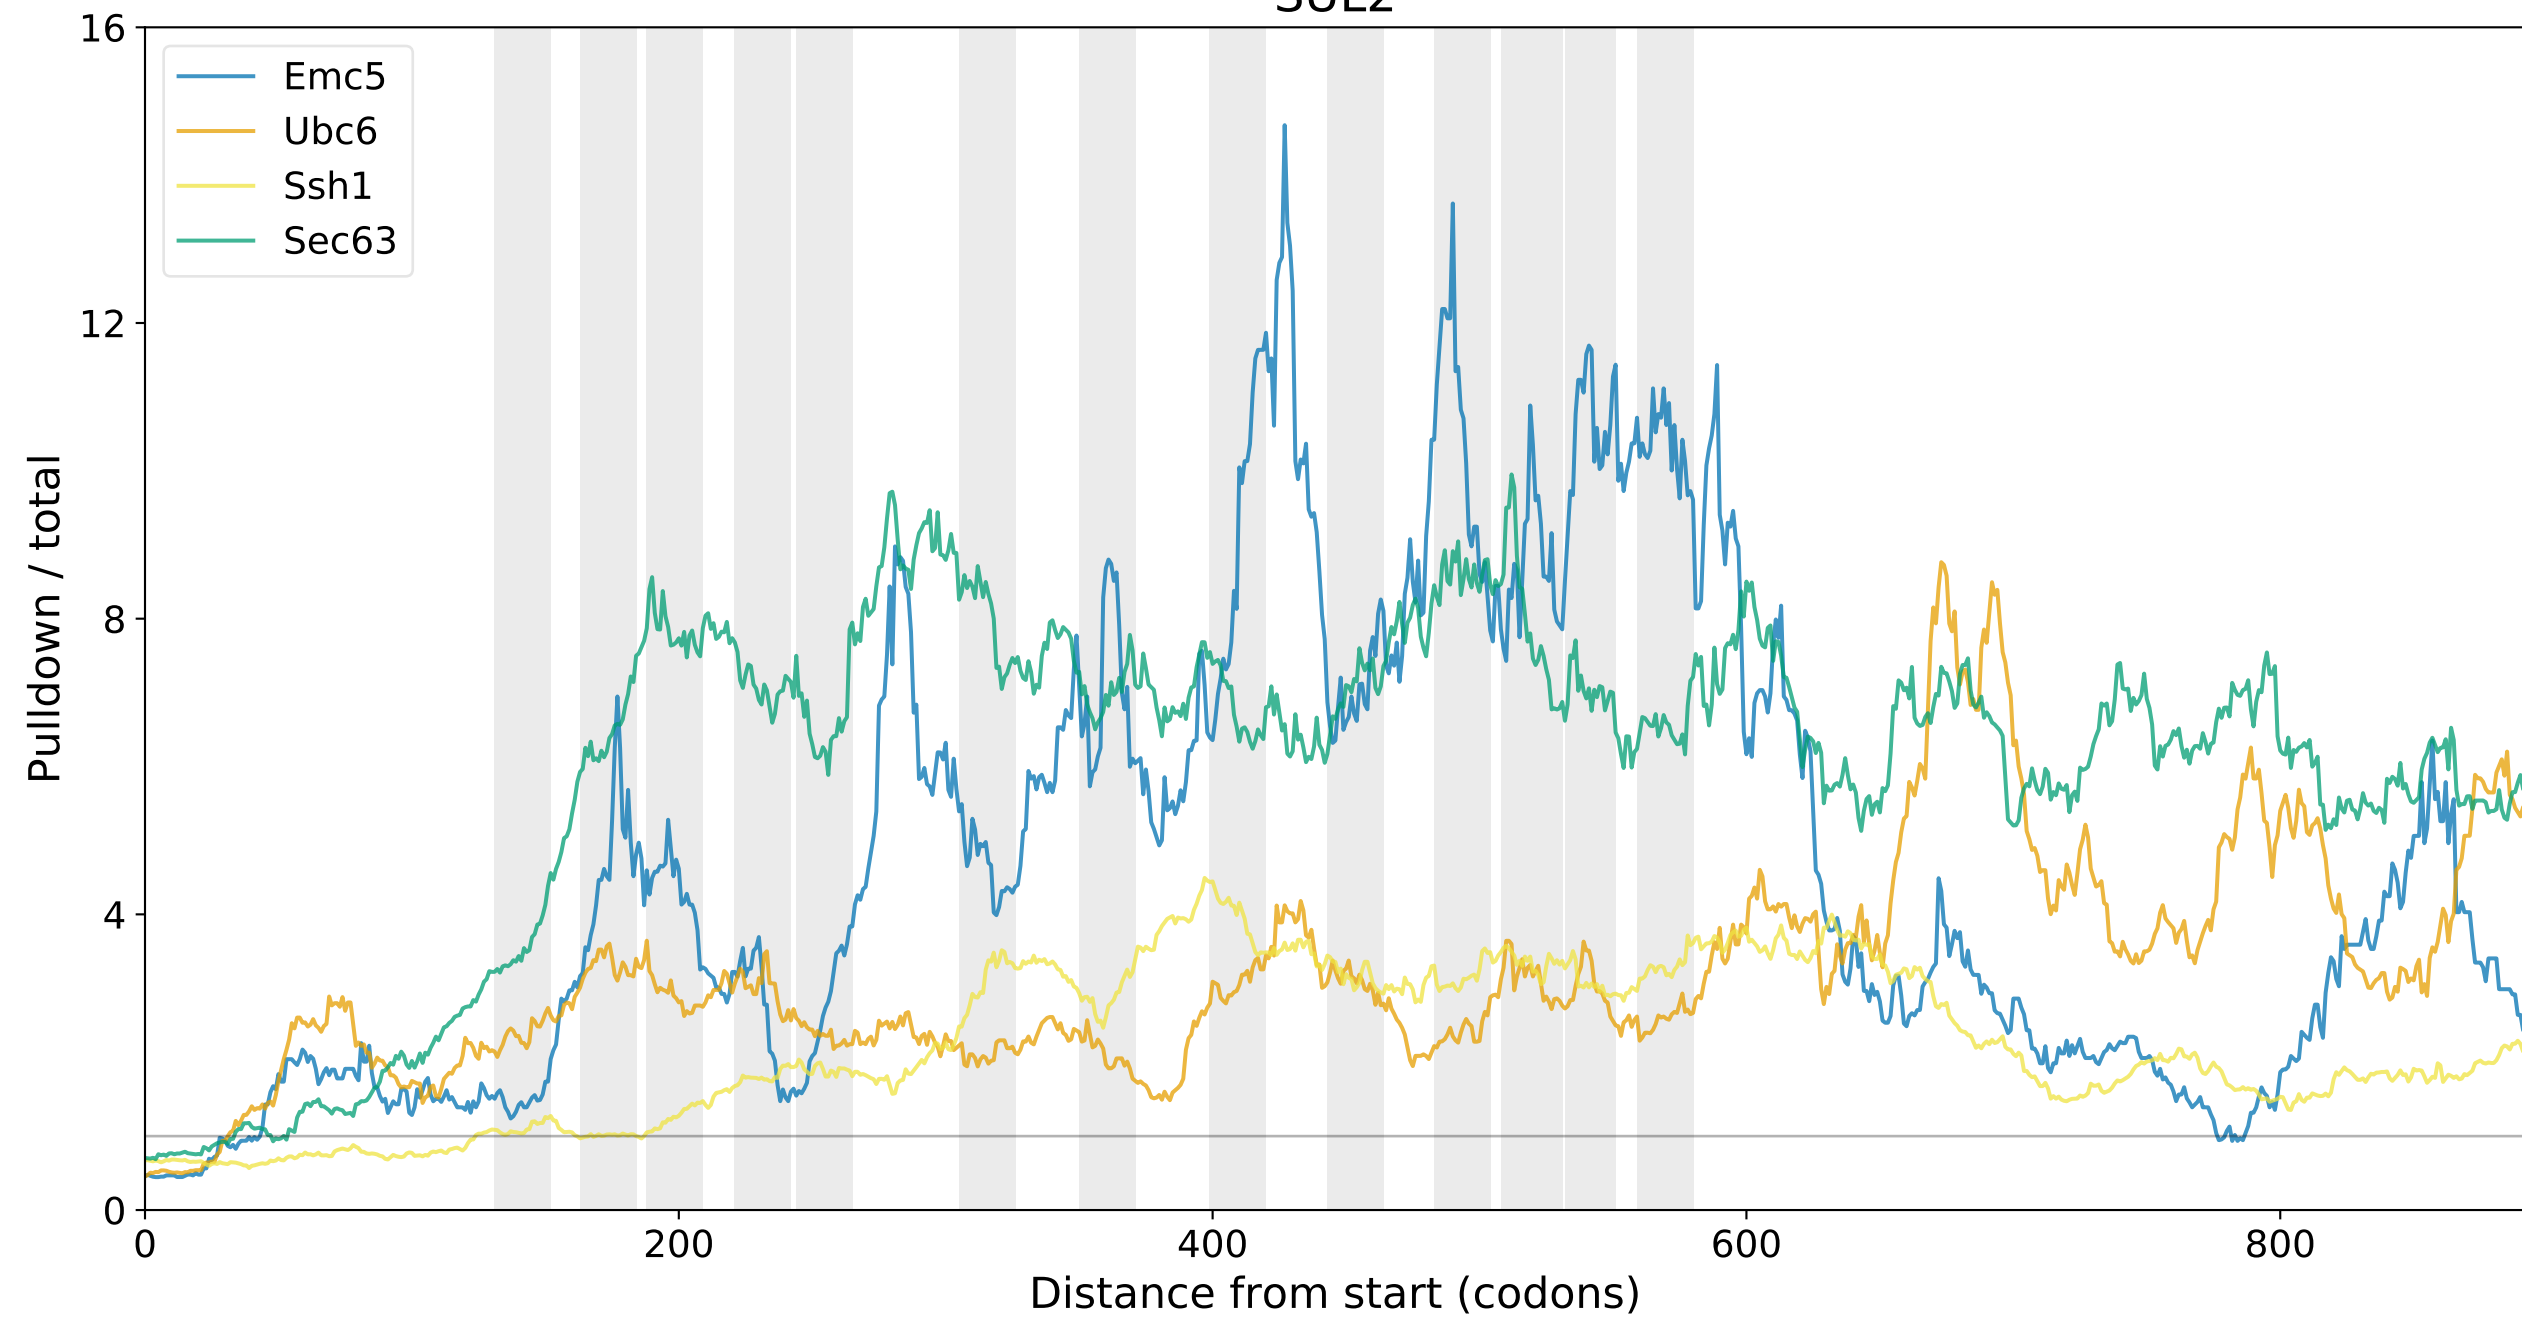

# YGL140C

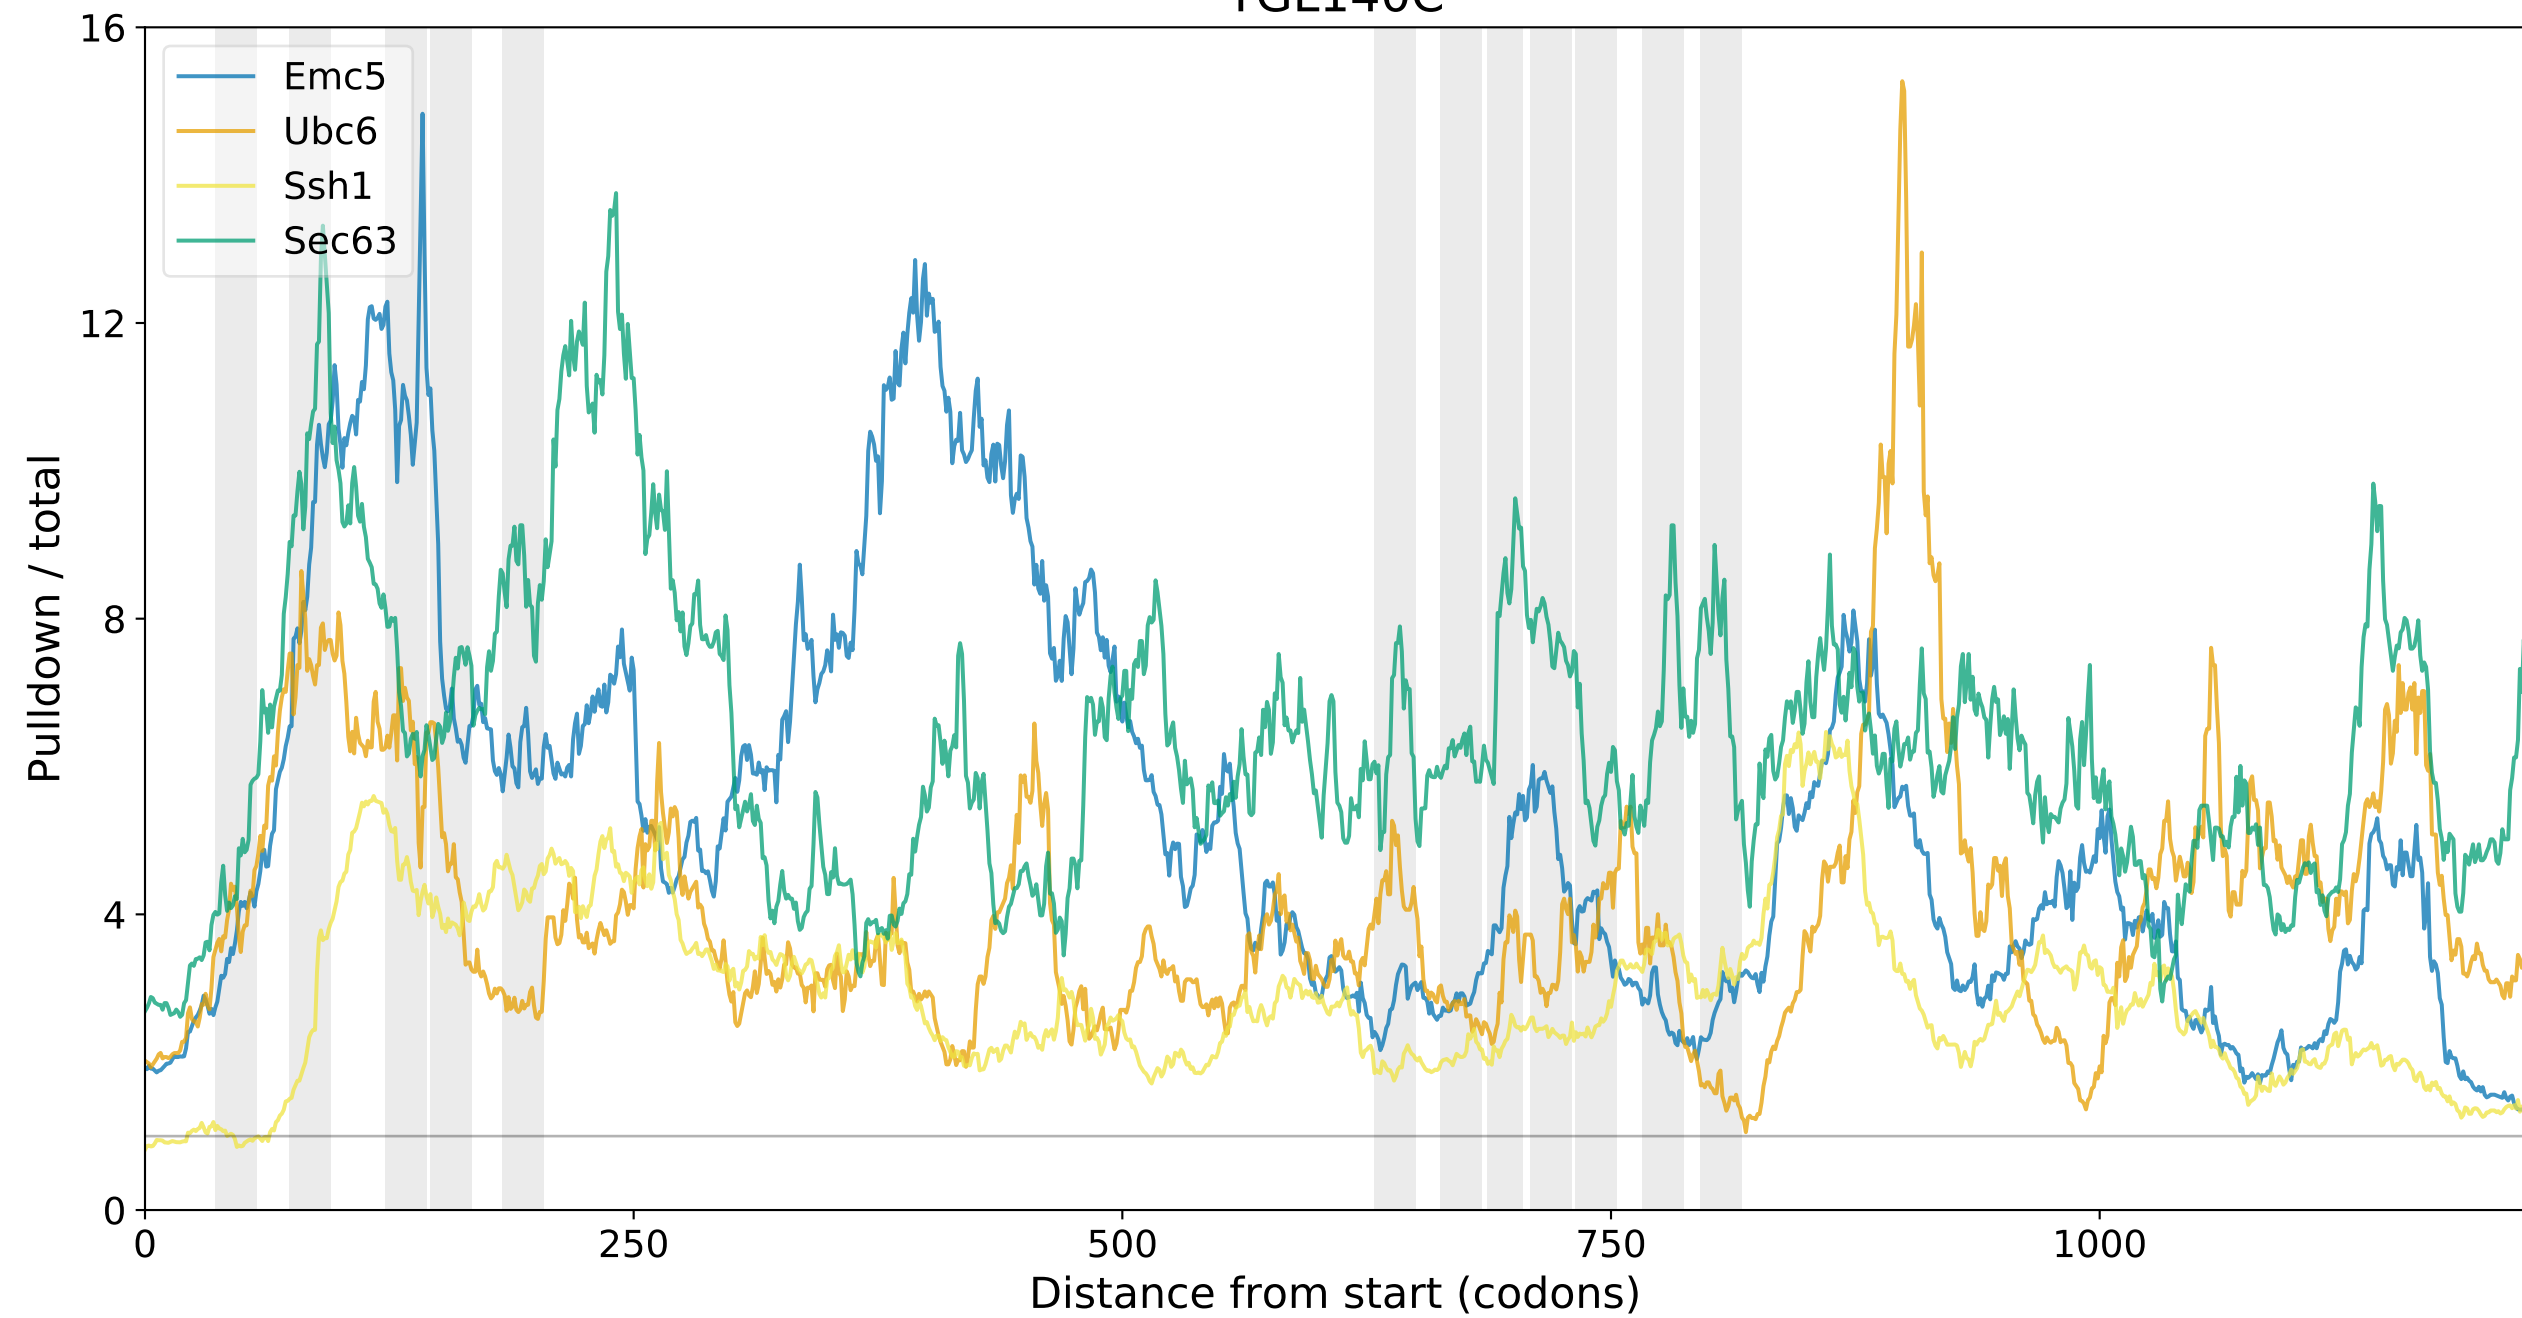

# YPL162C

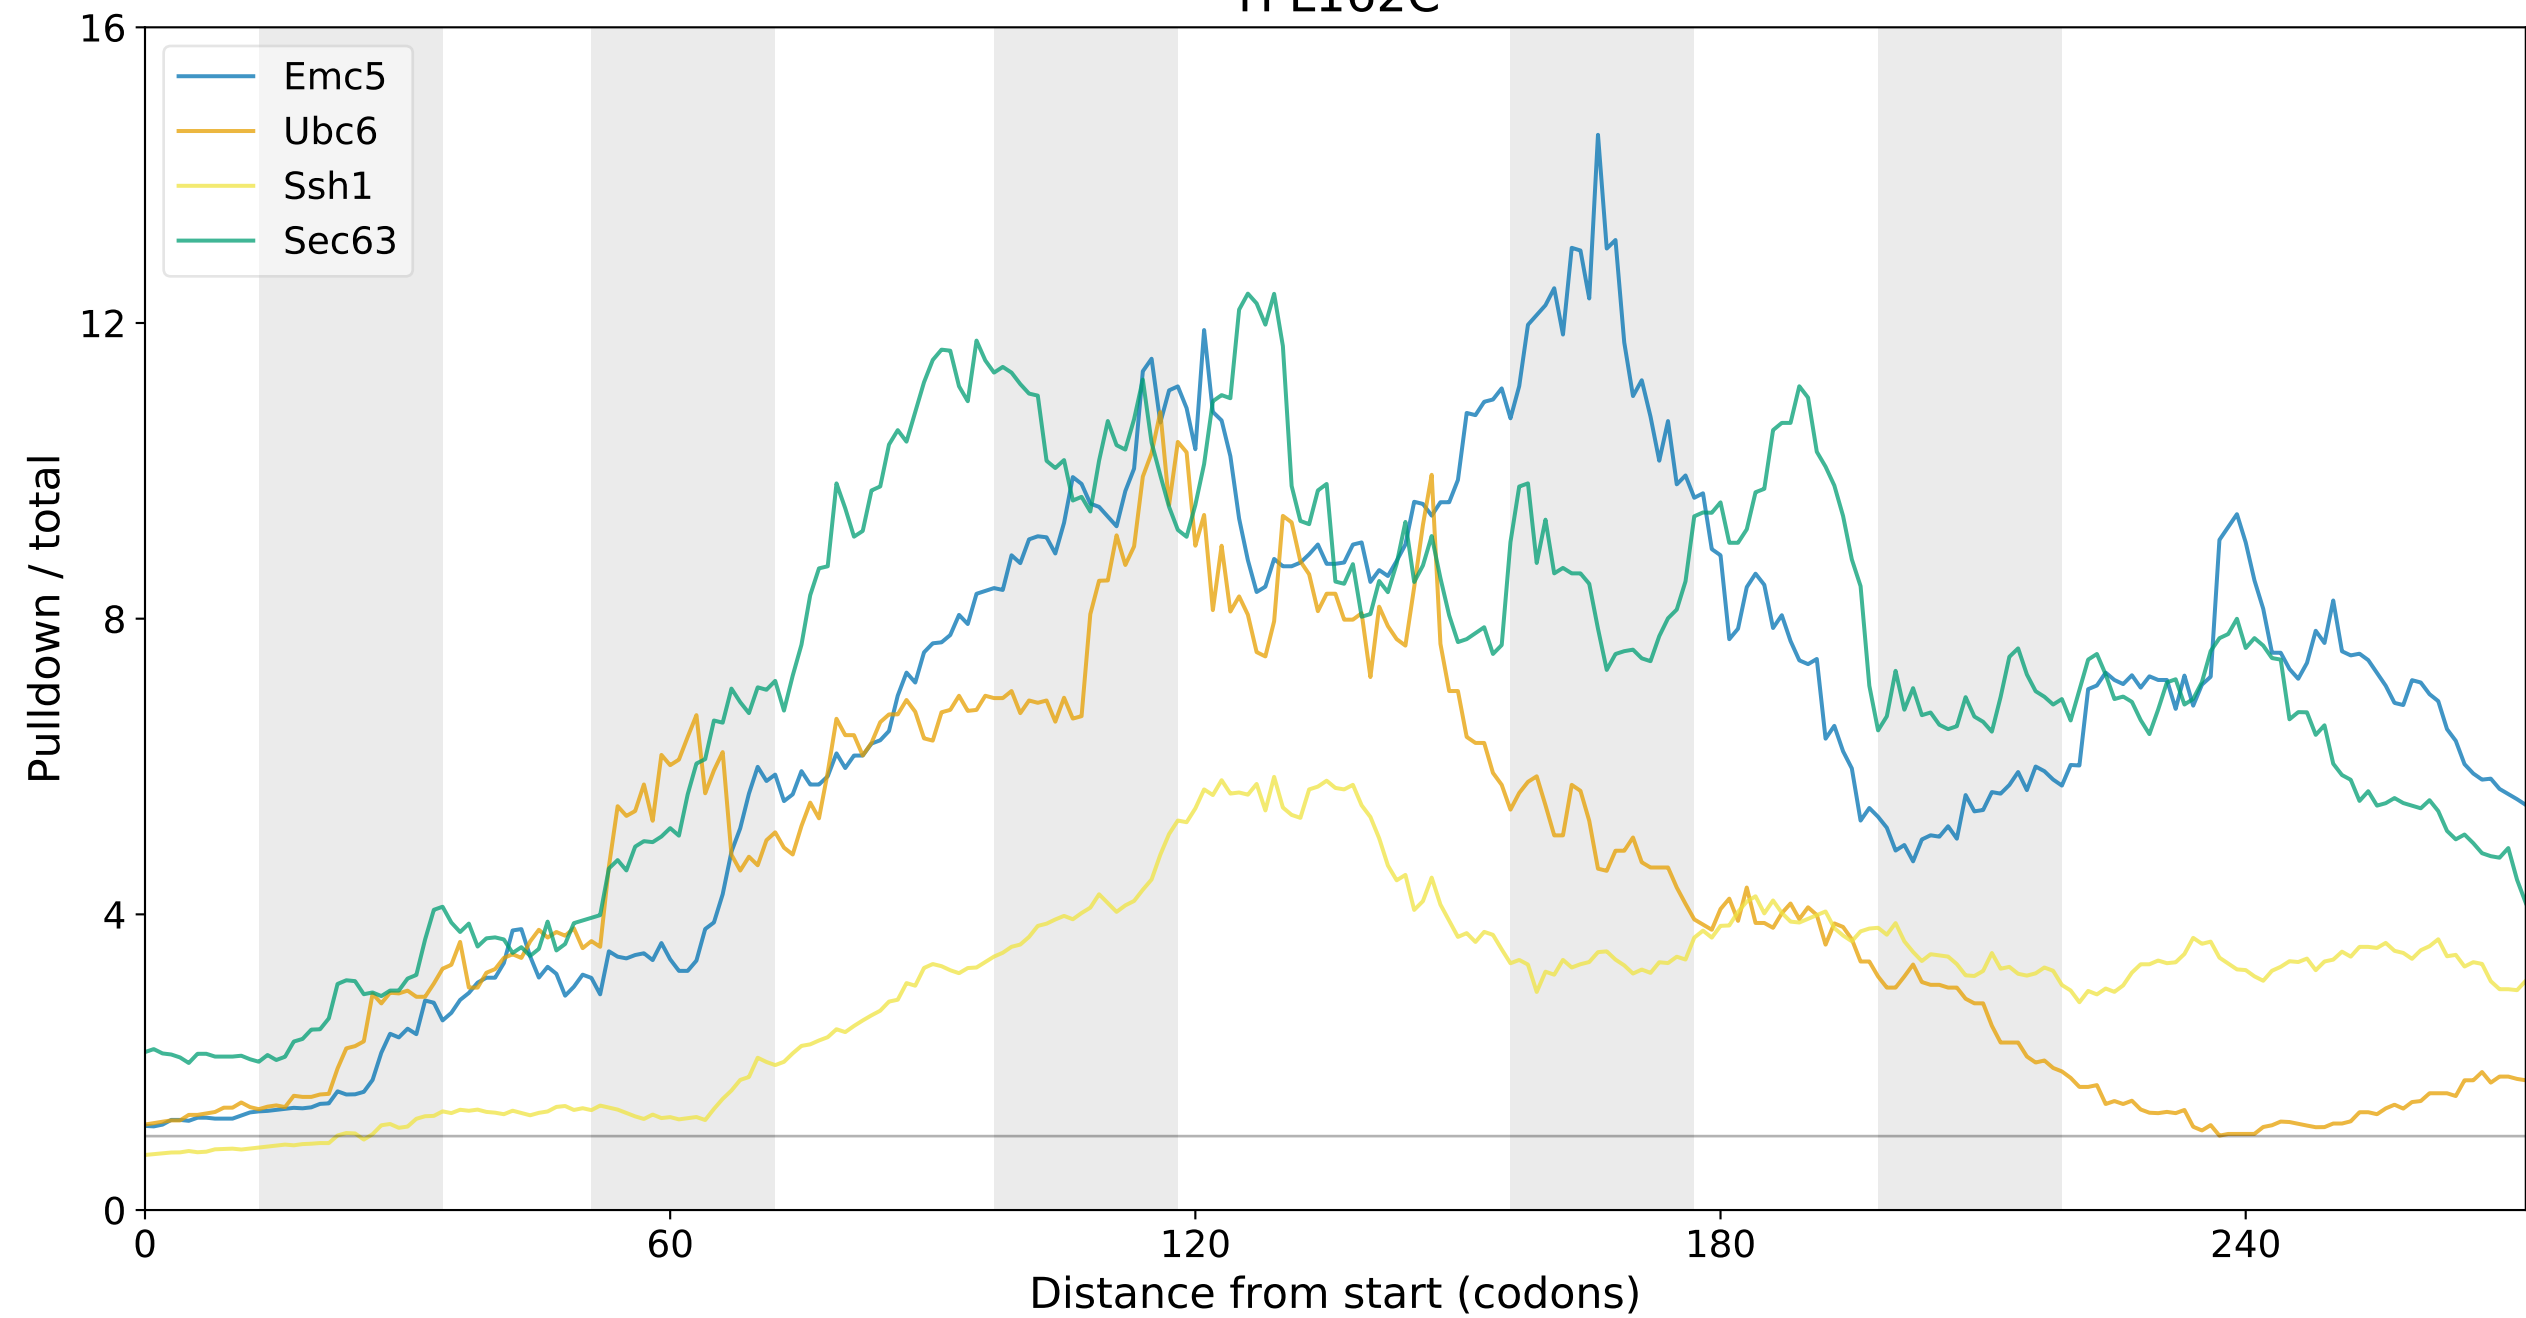

# GYP7

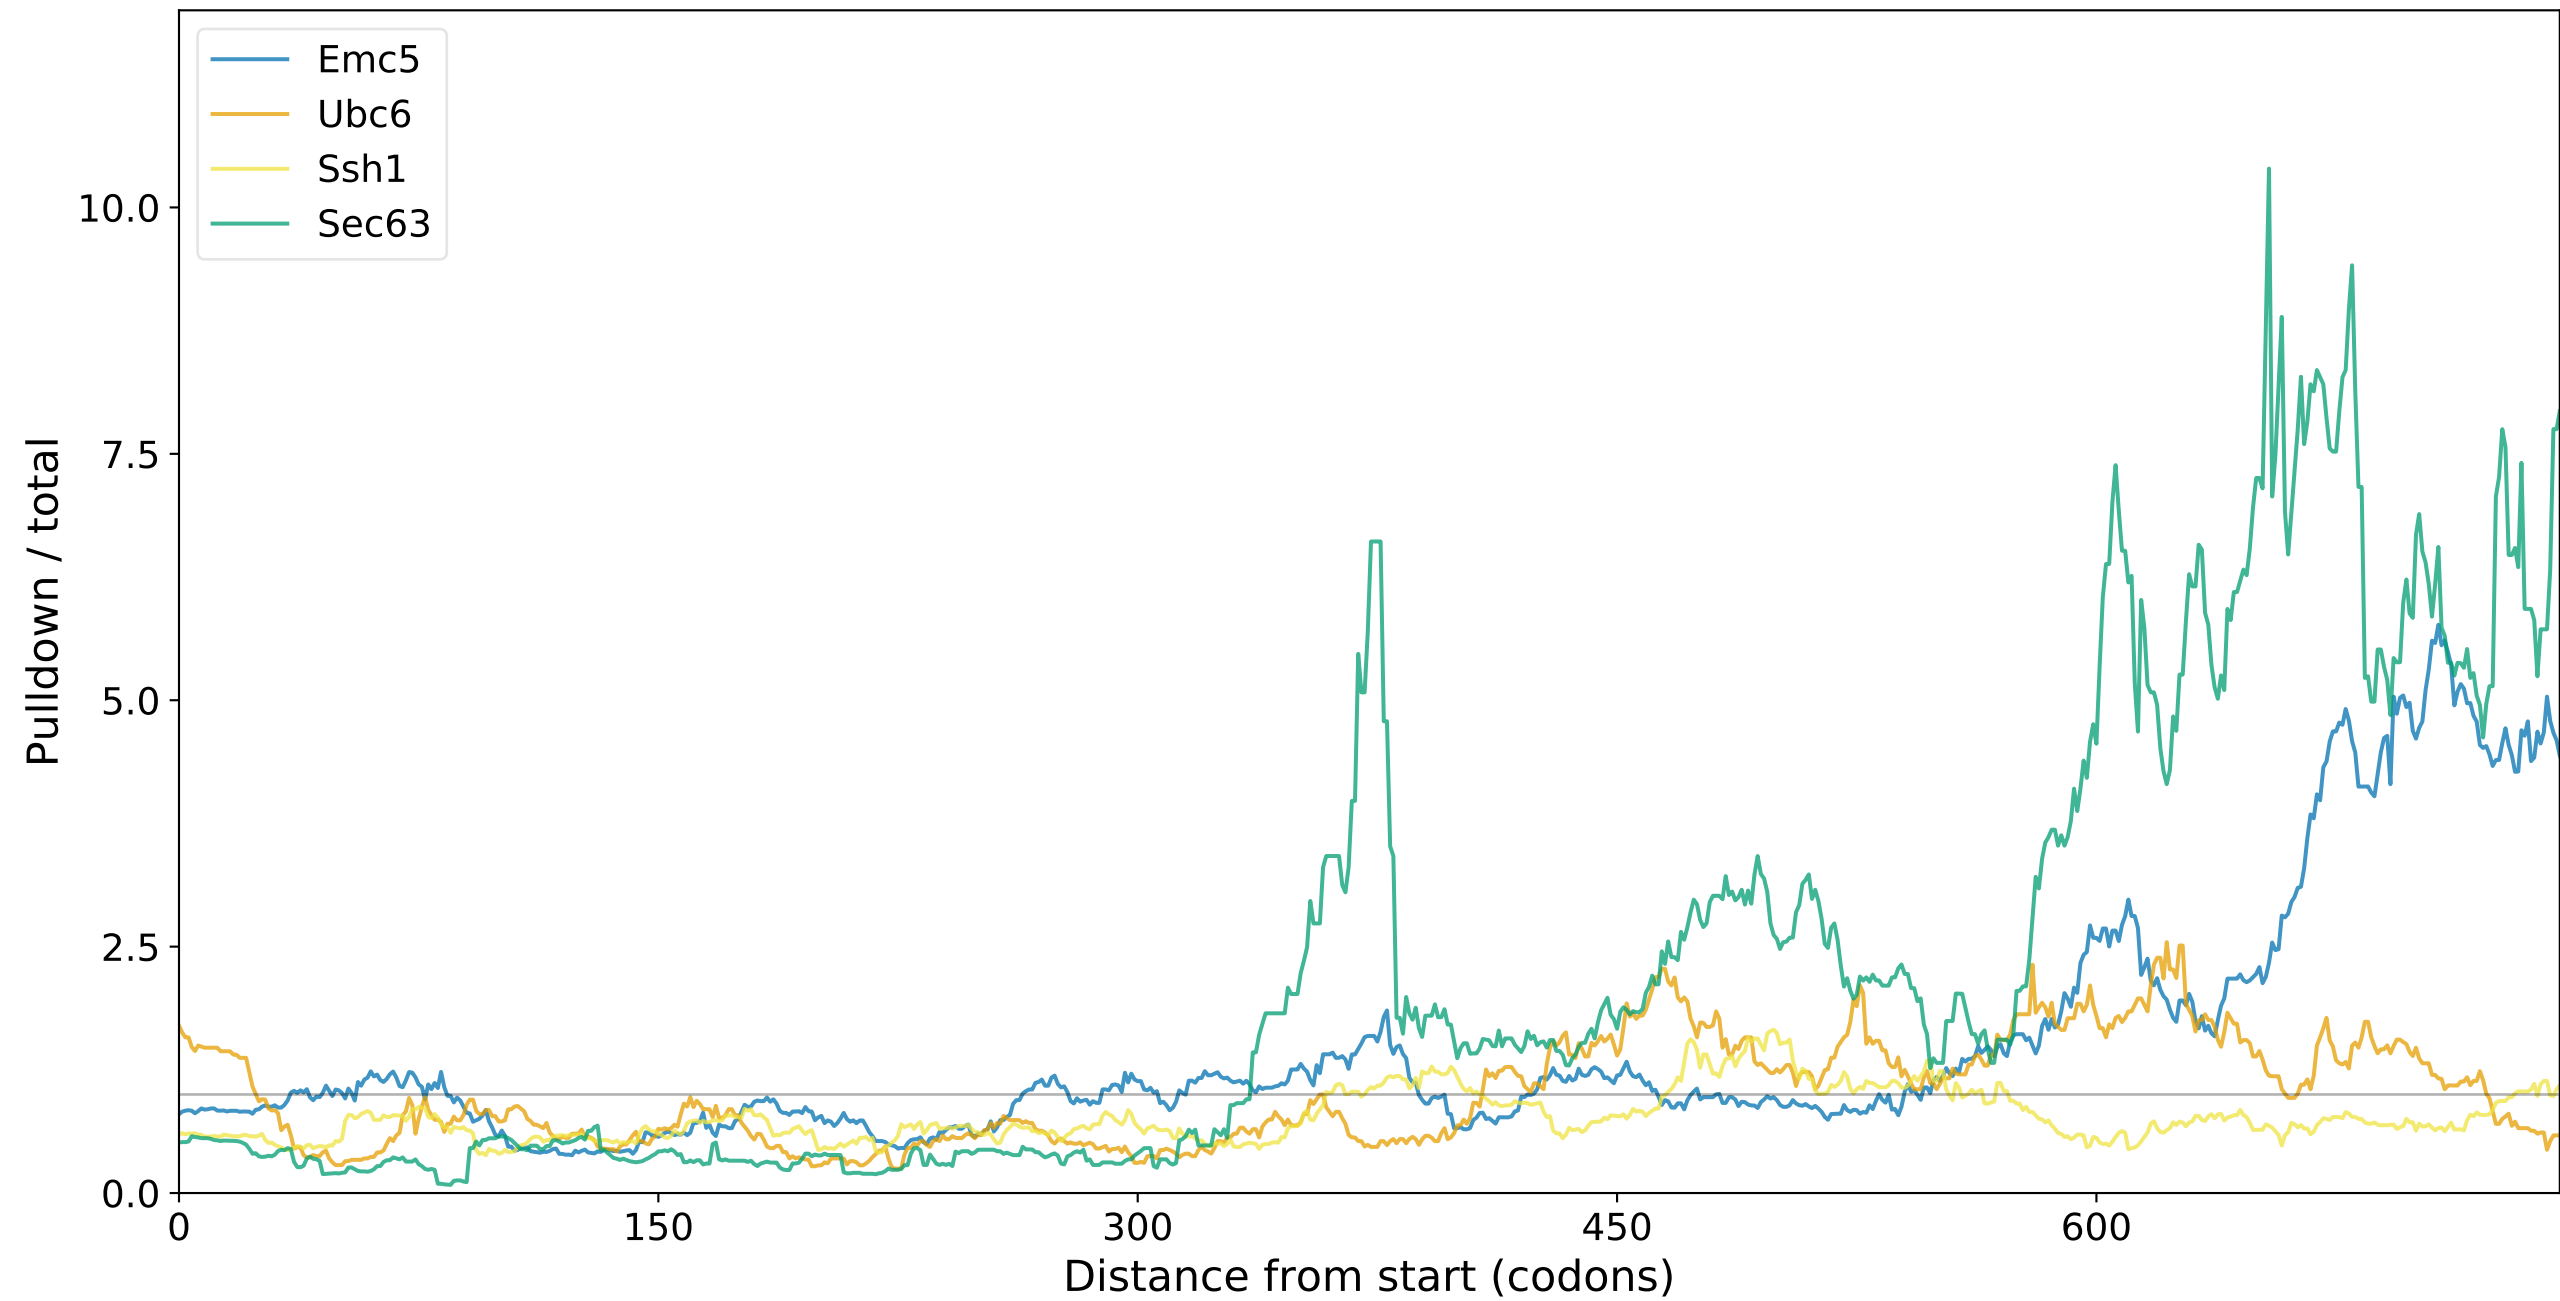

# PTR2

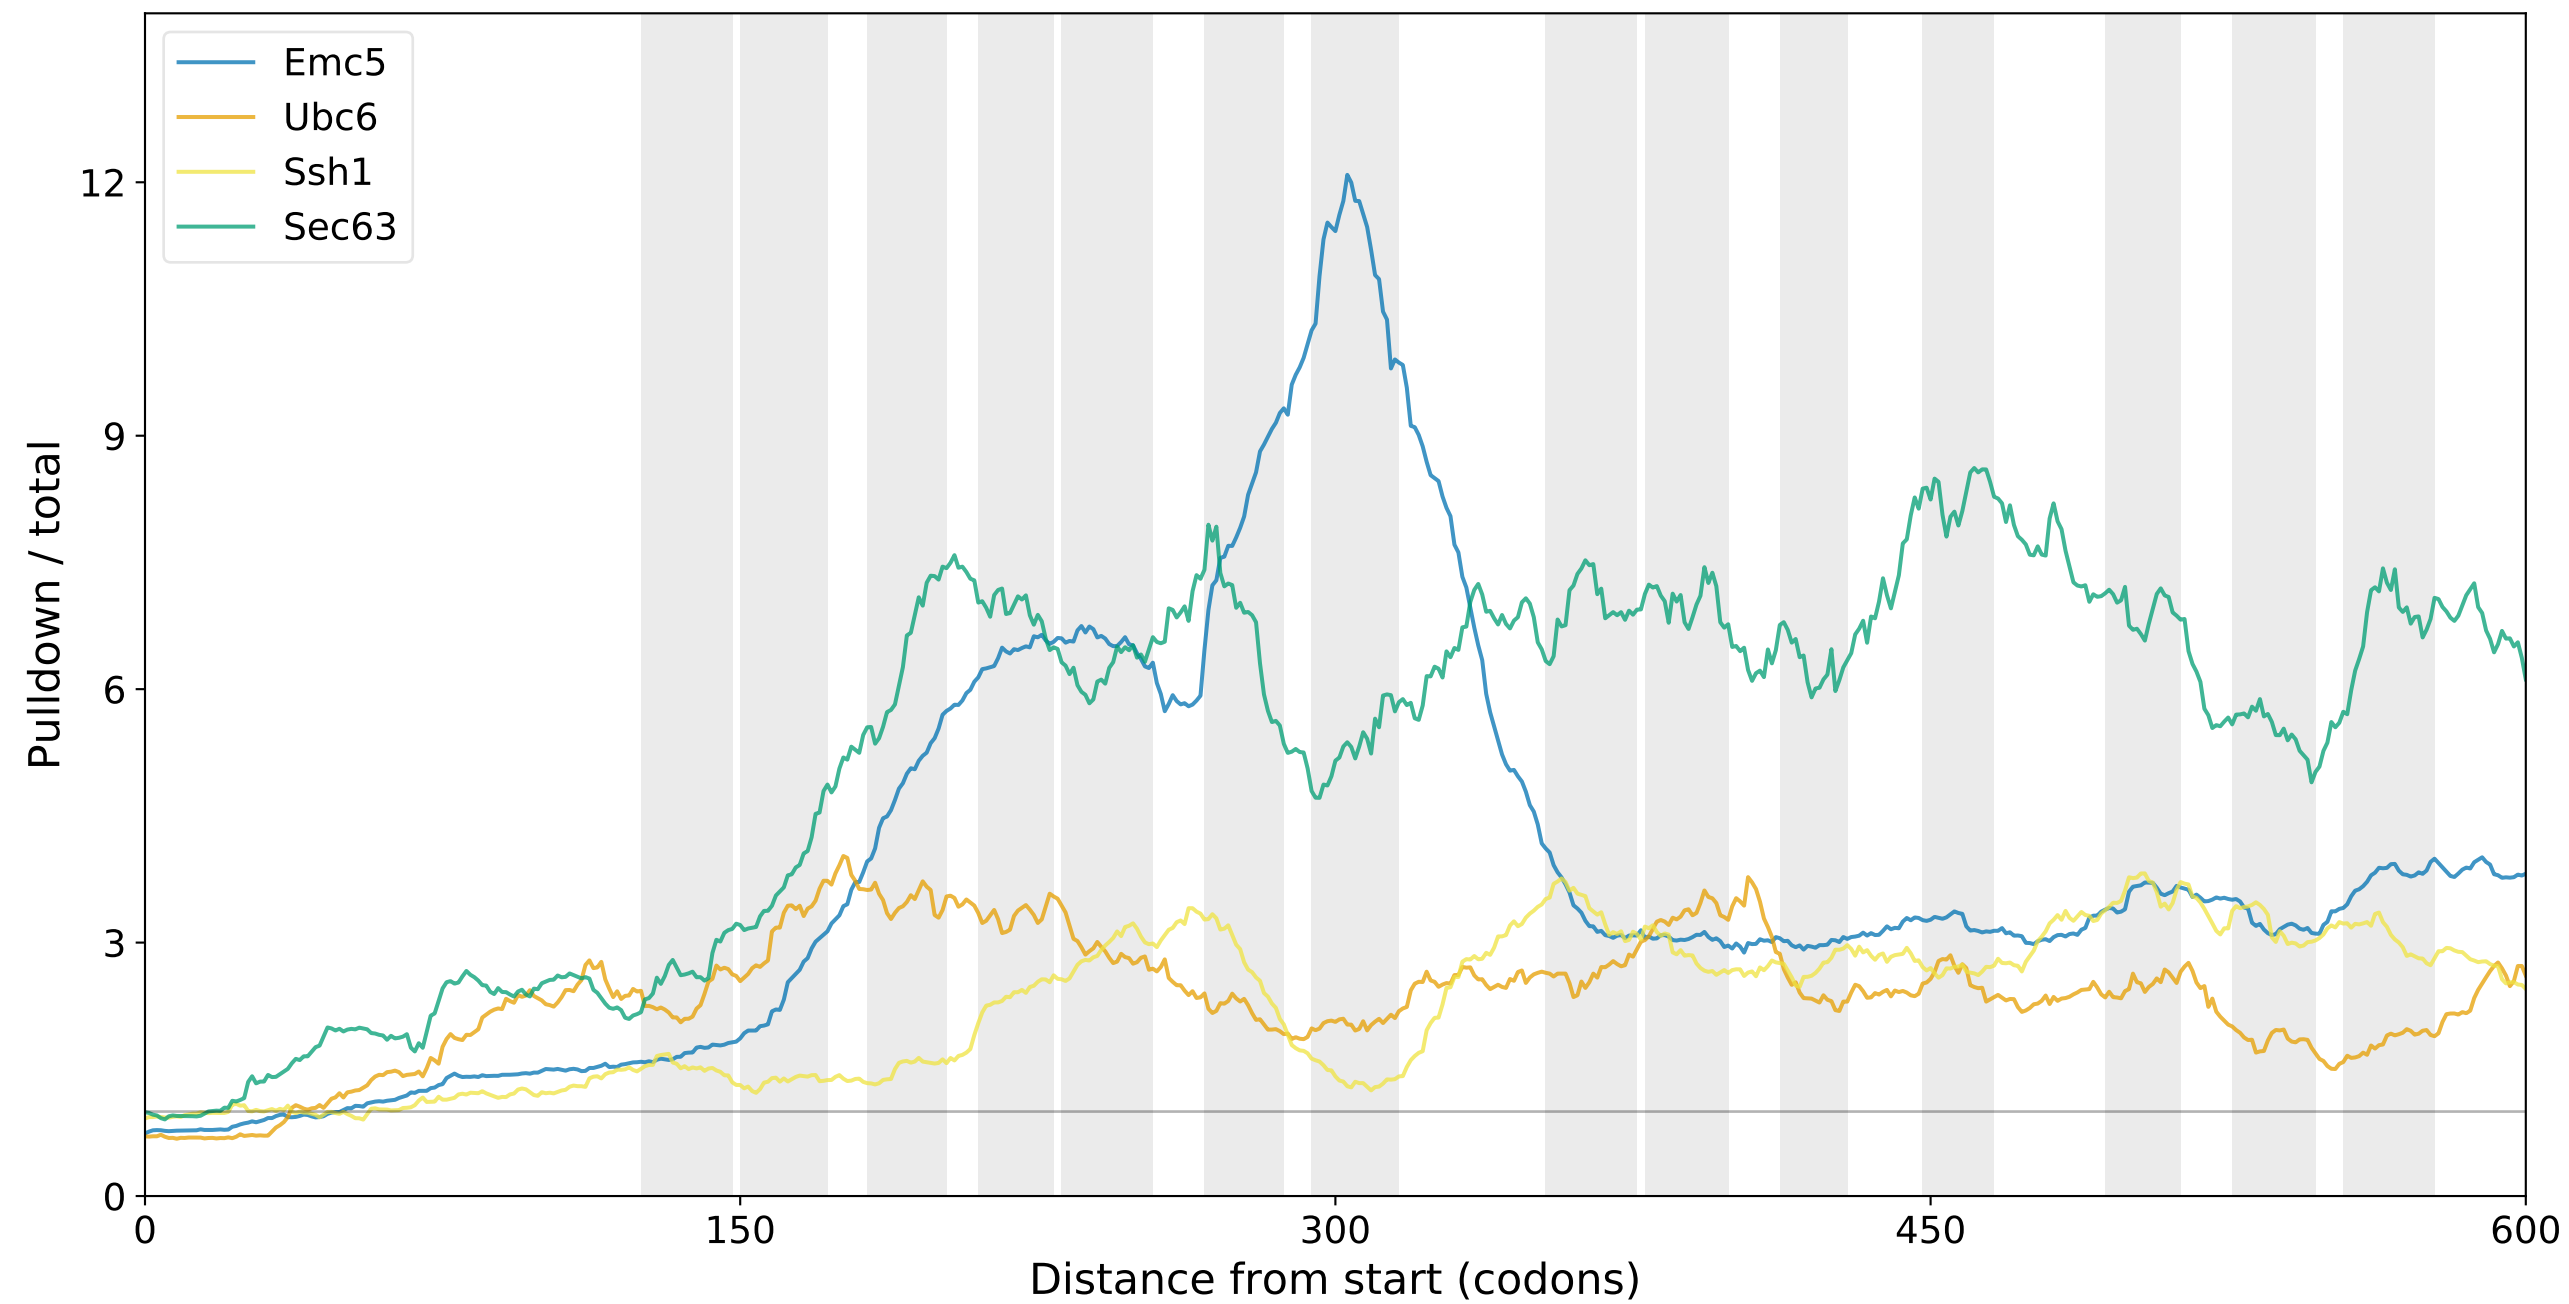

## YPR003C

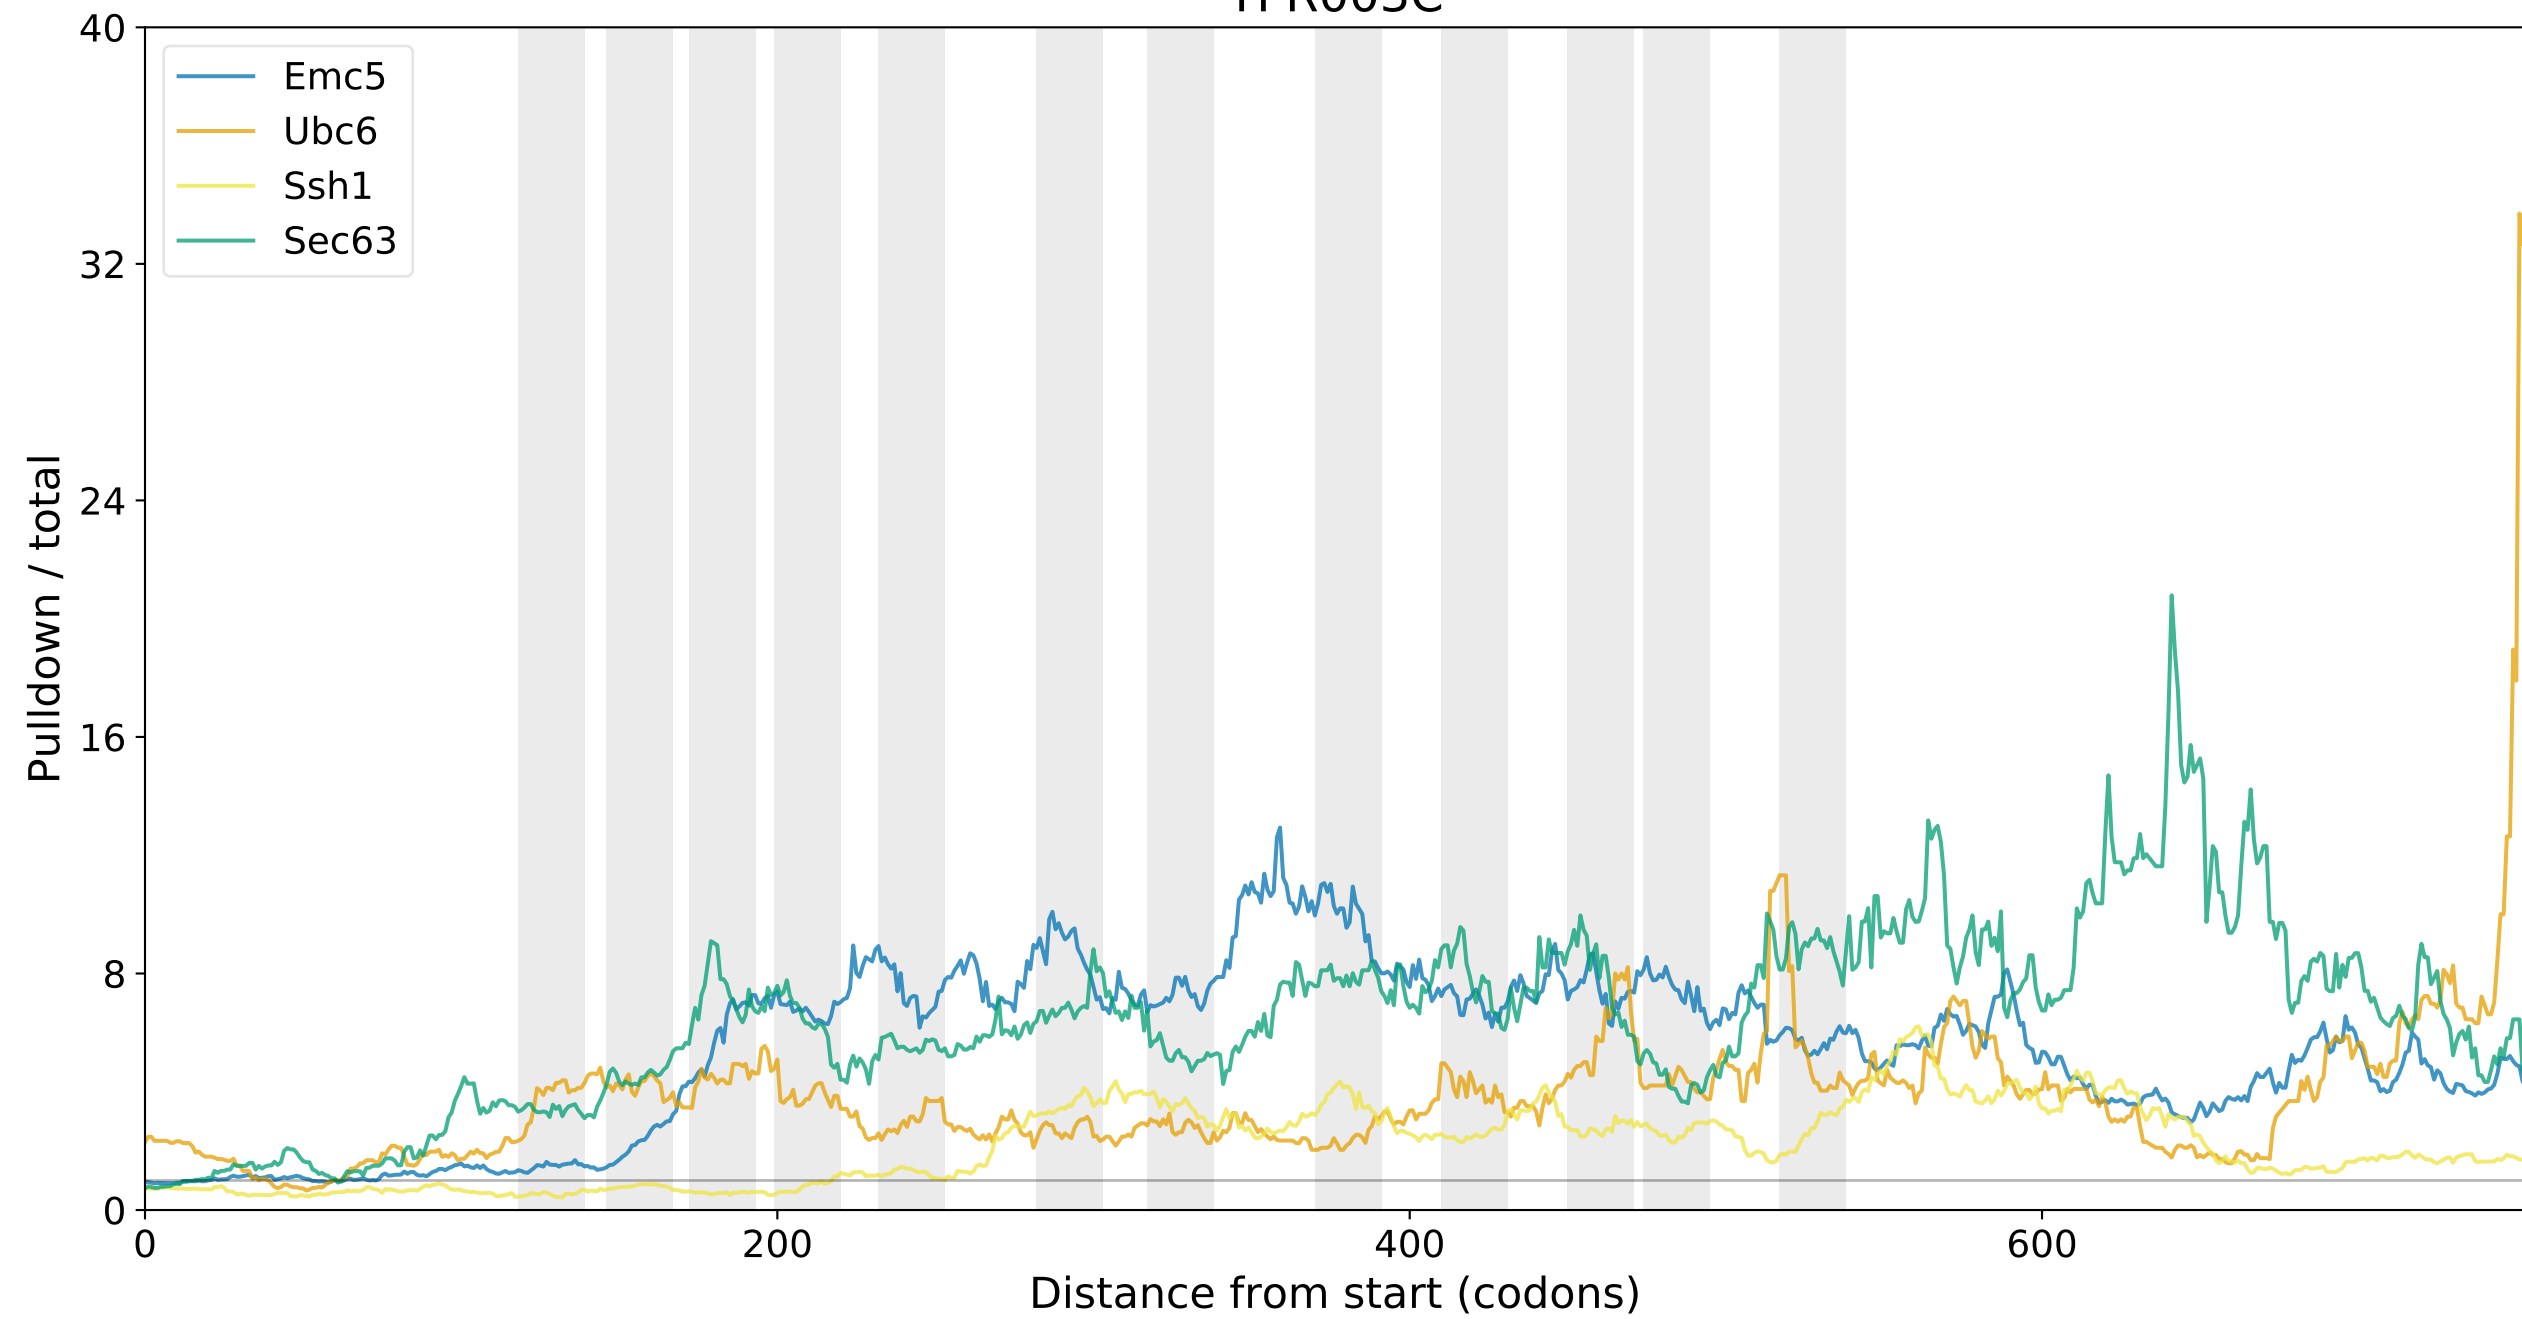

# ENB1

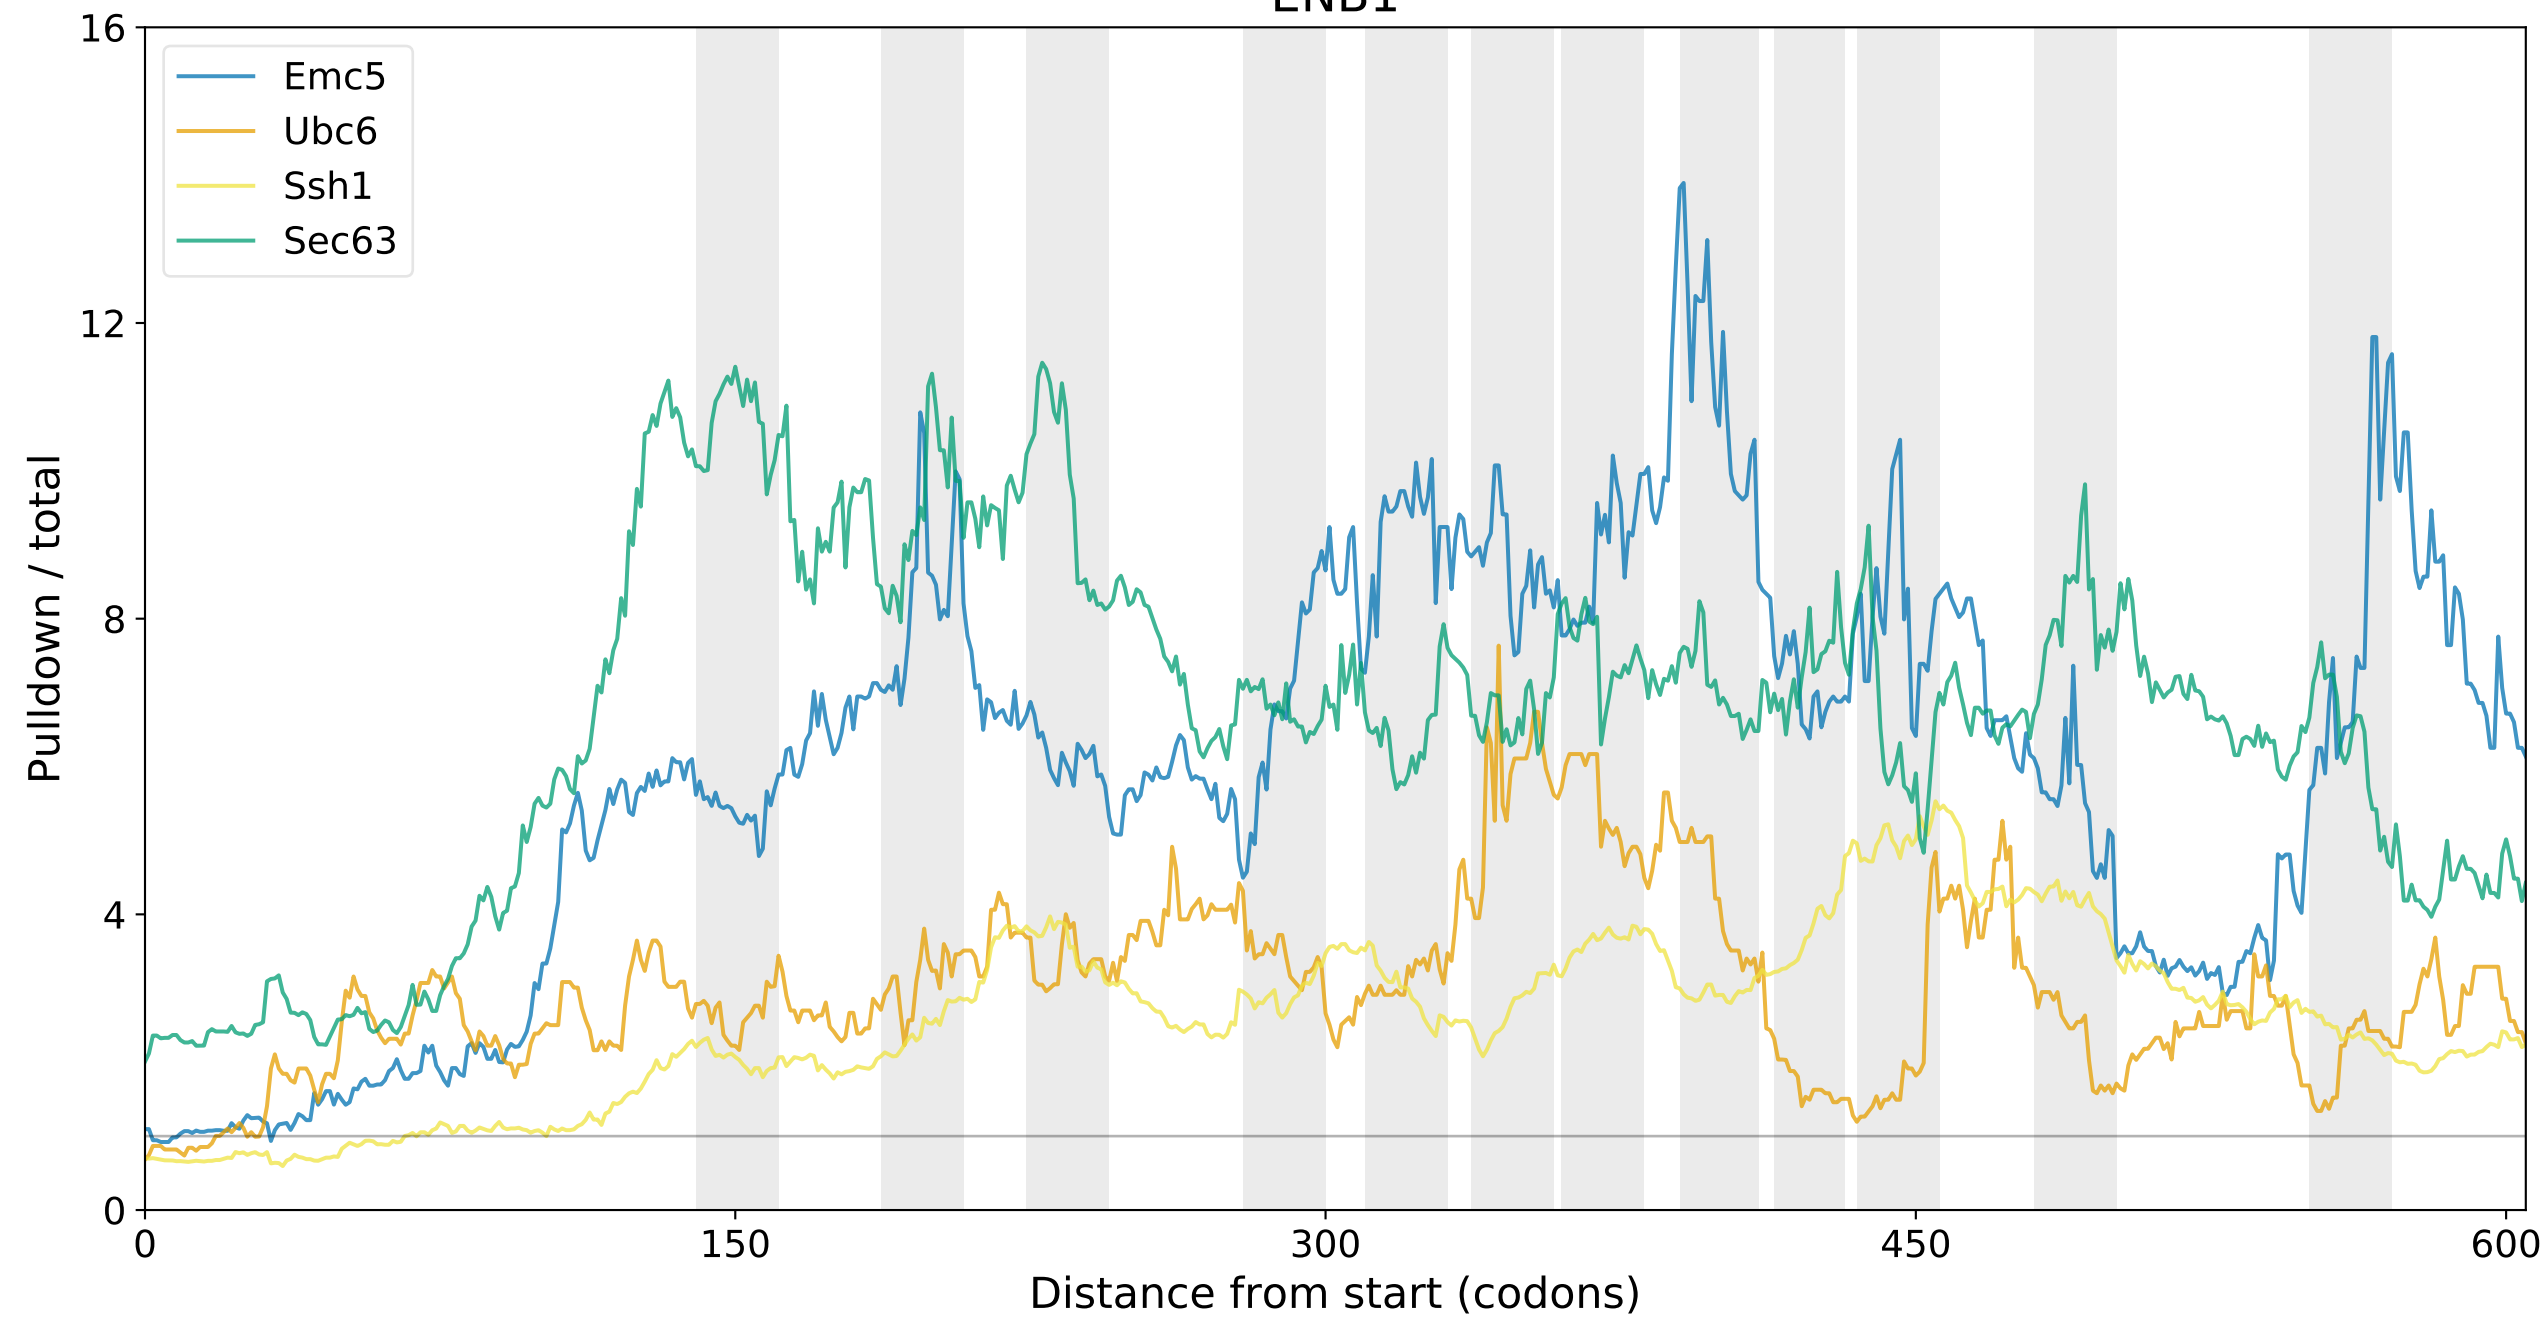



# VPH1

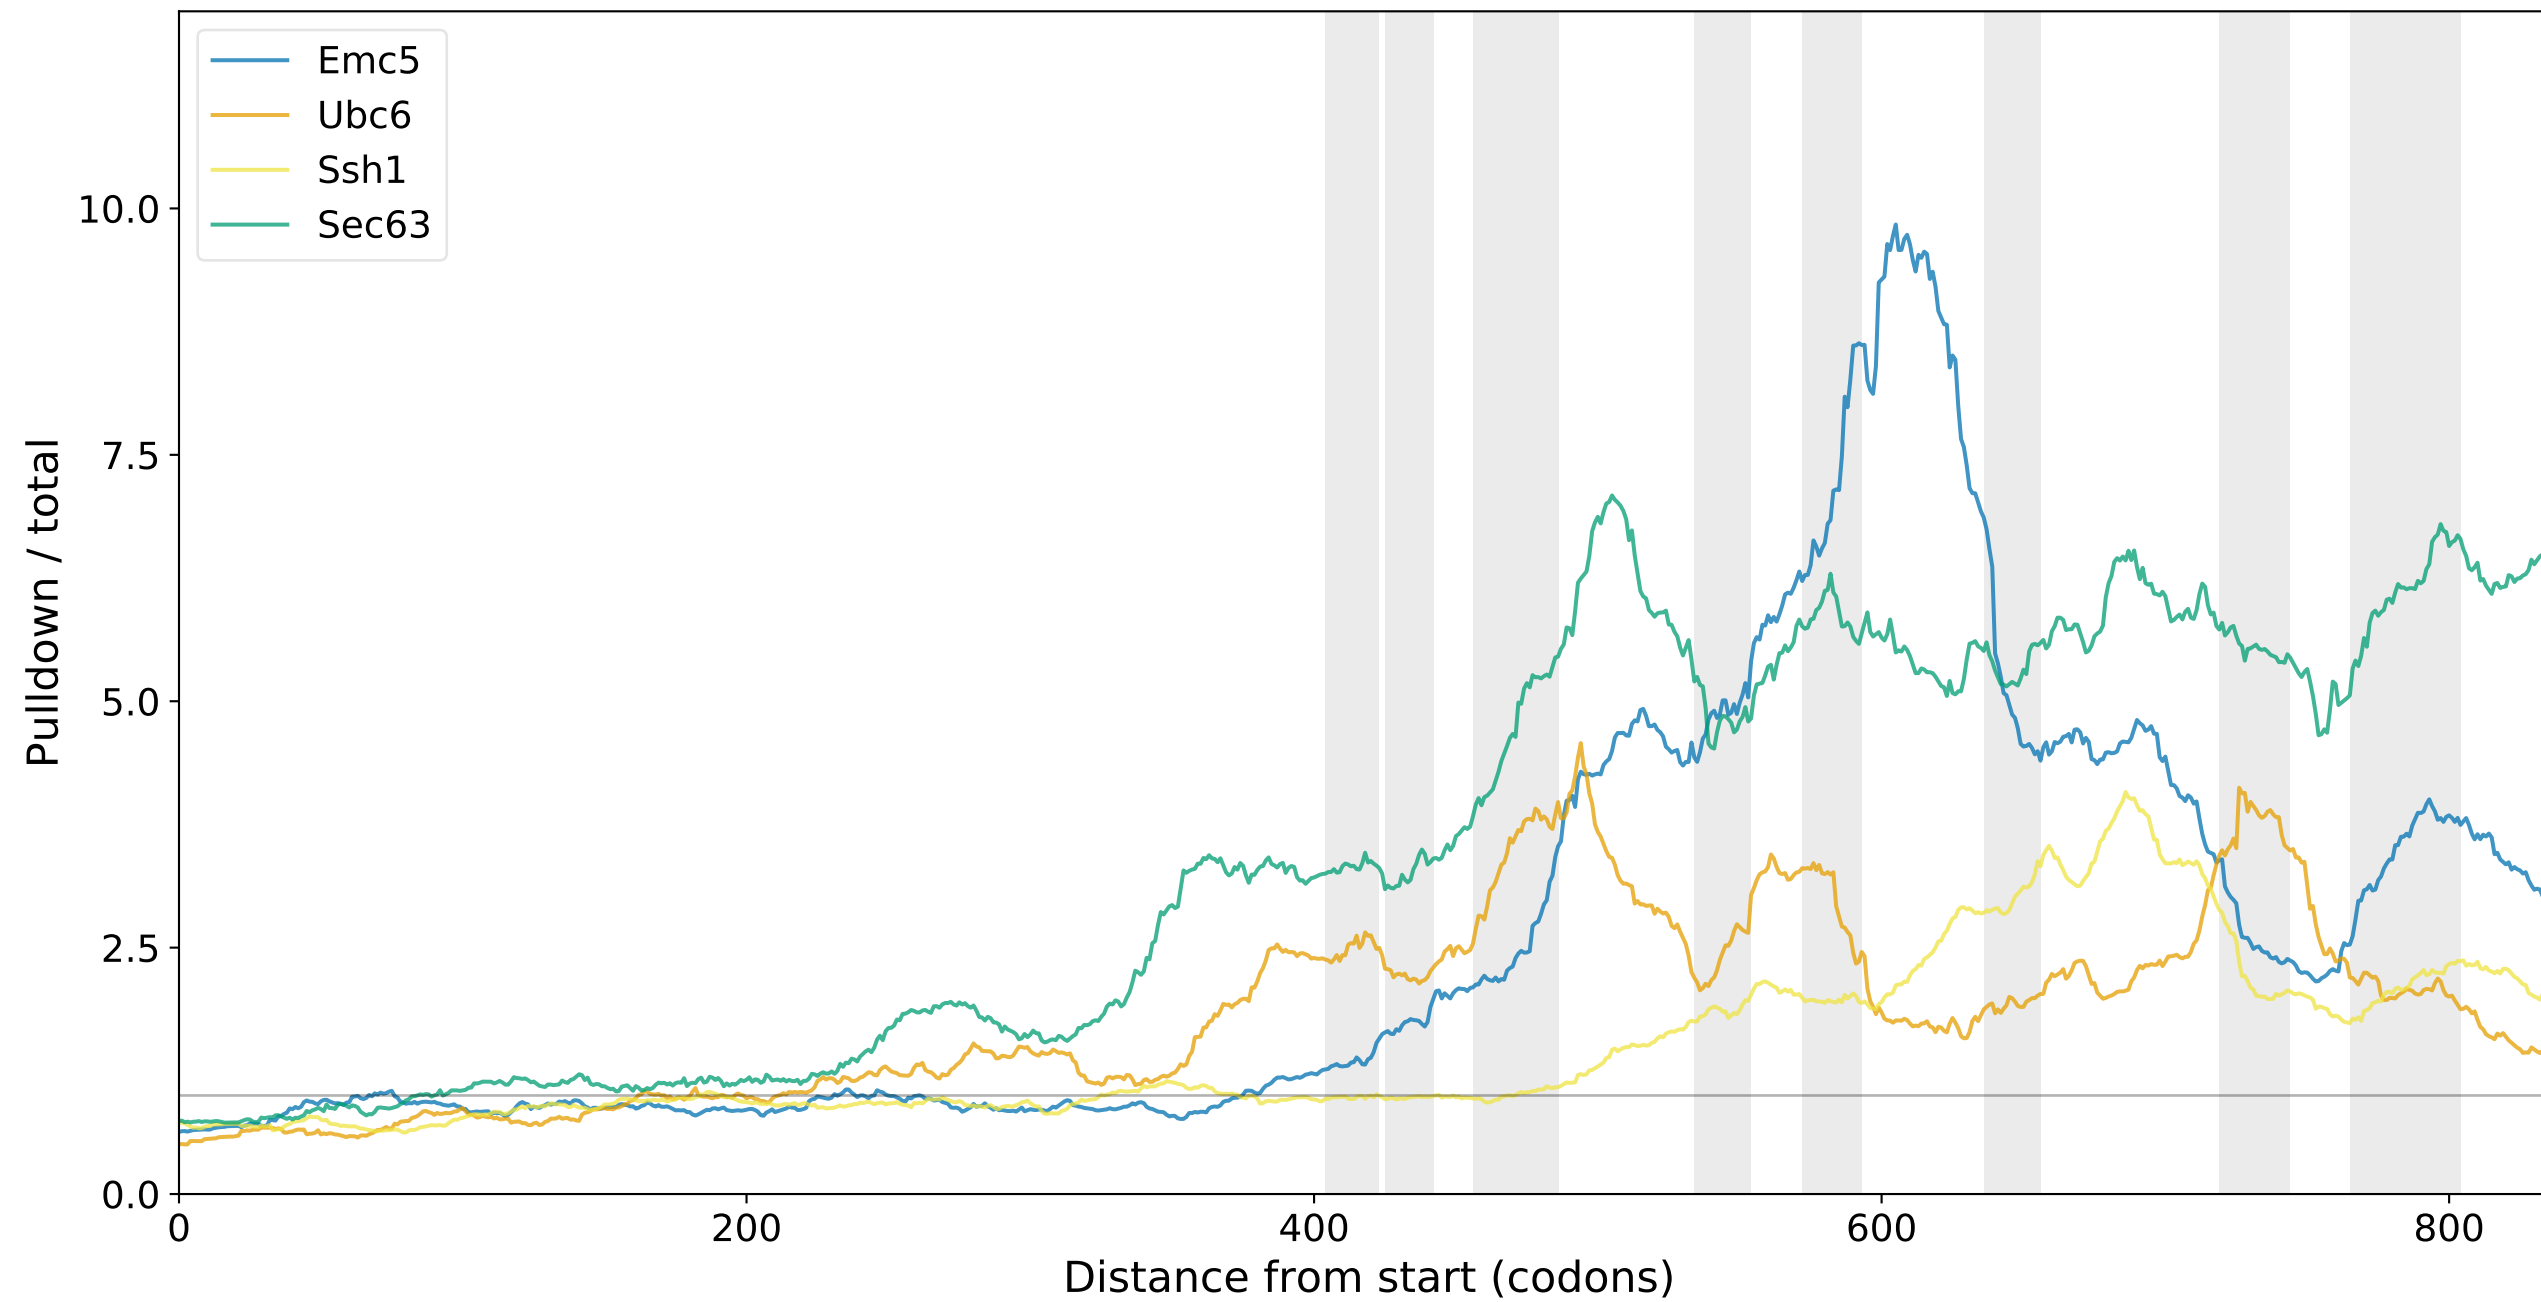

# DGA1

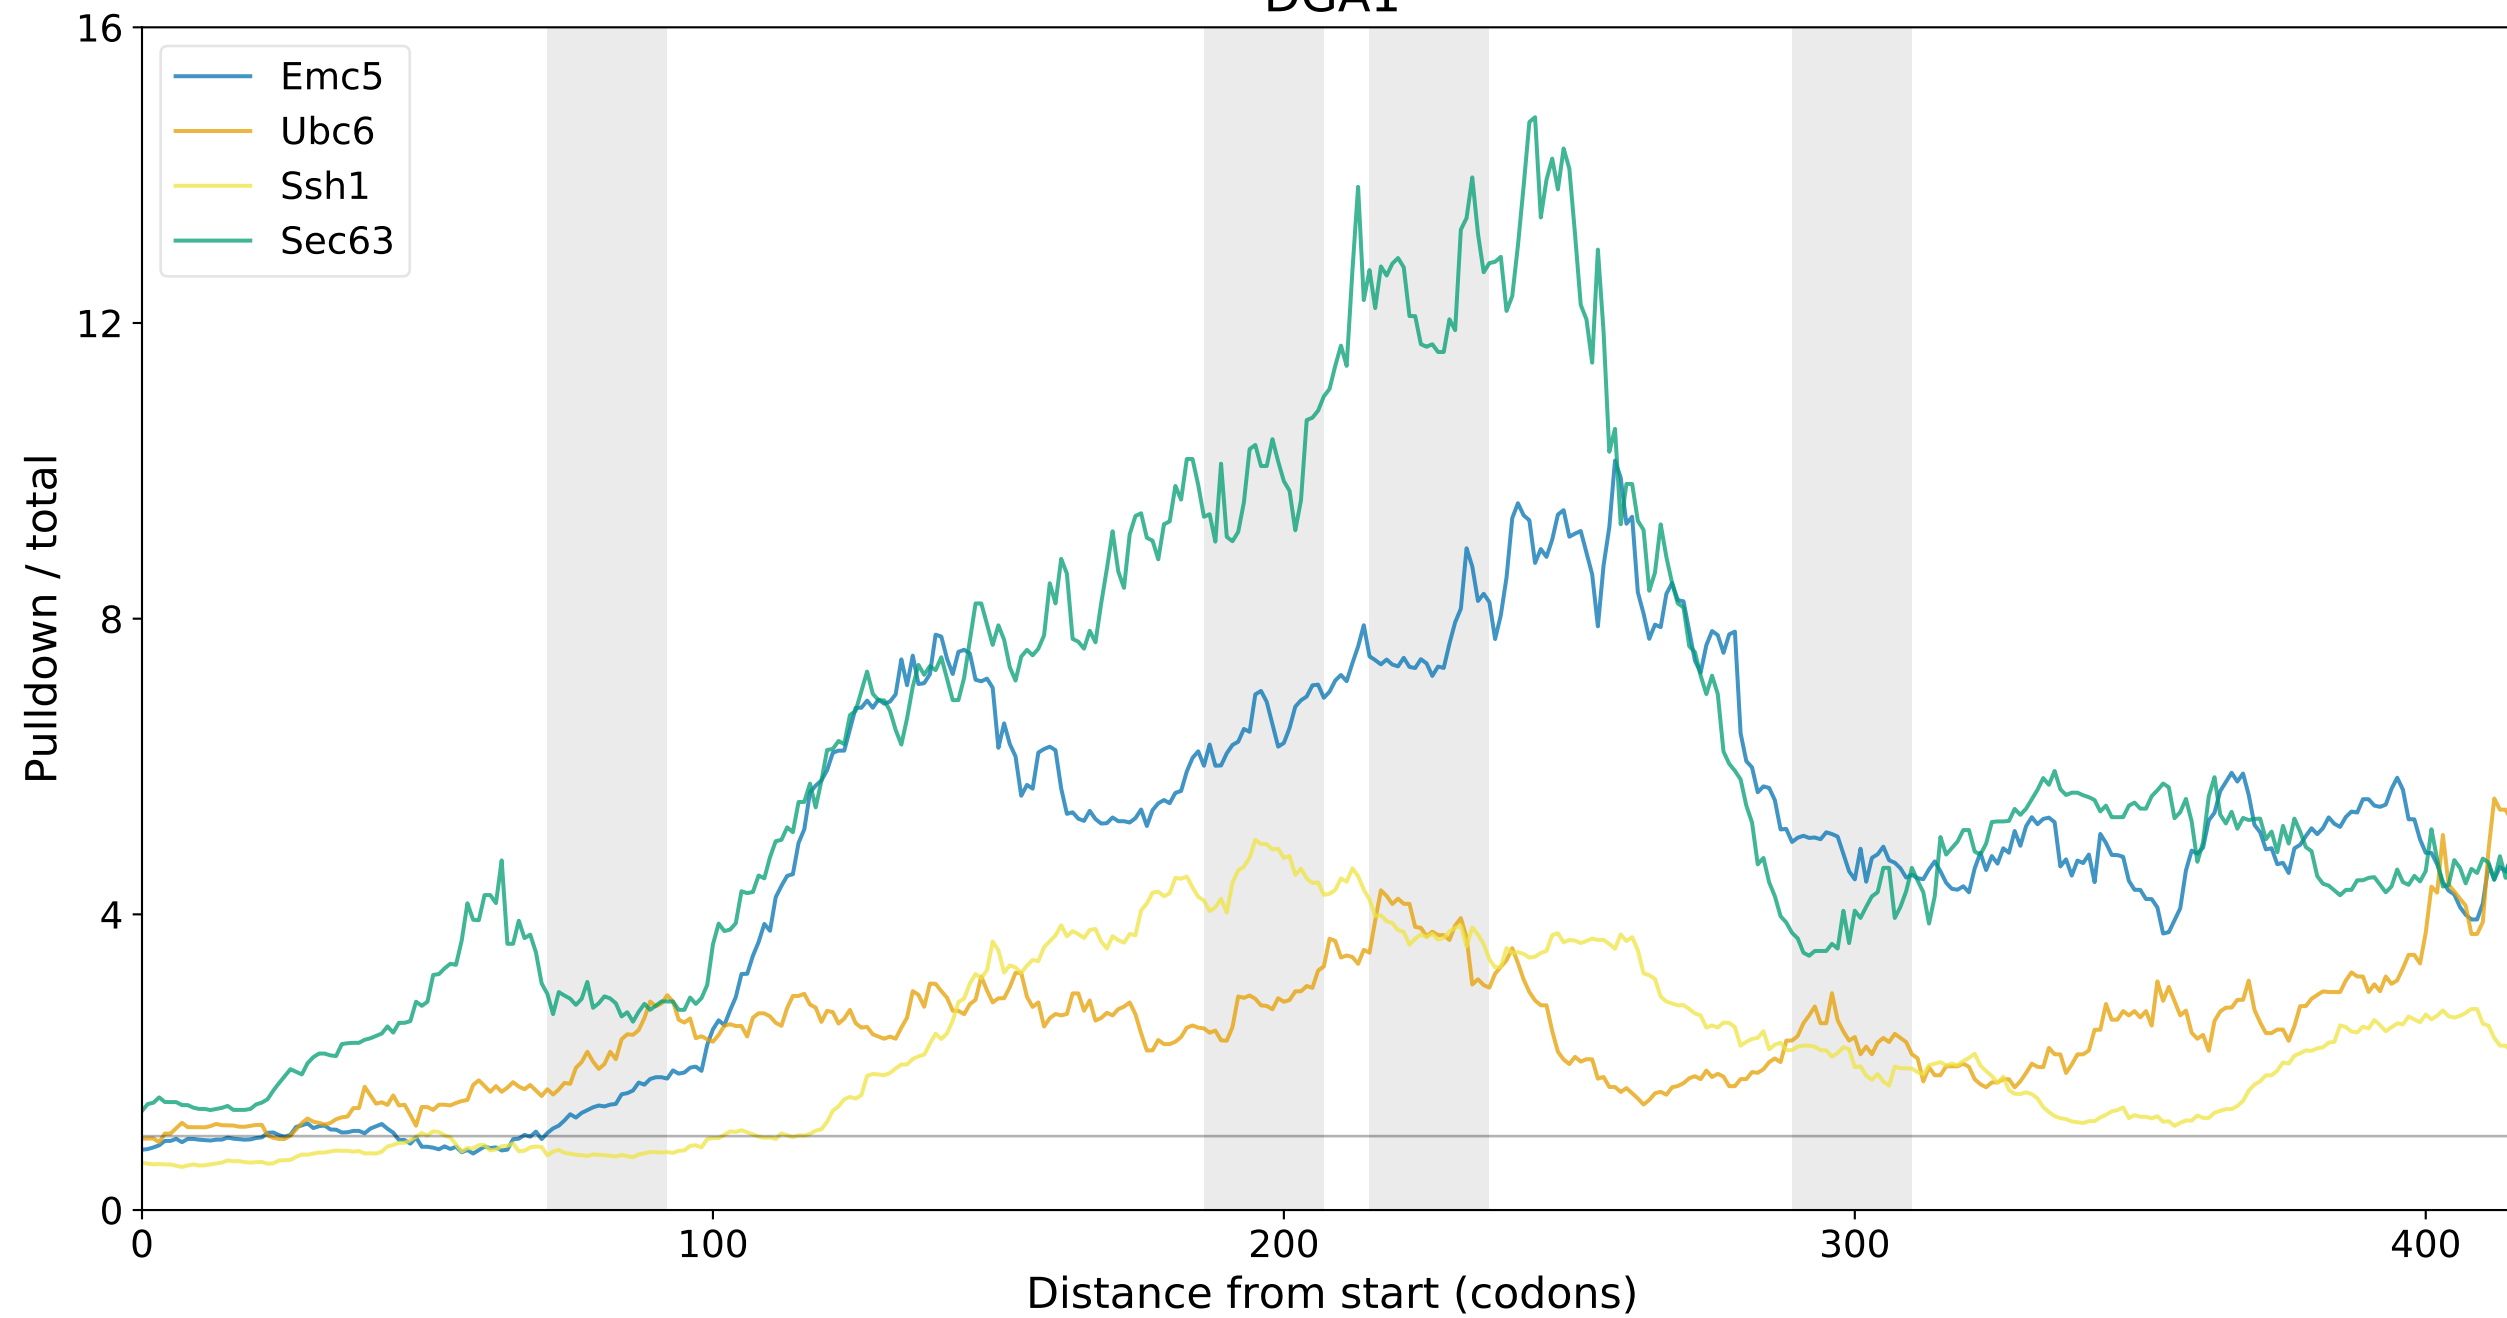

# HIP1

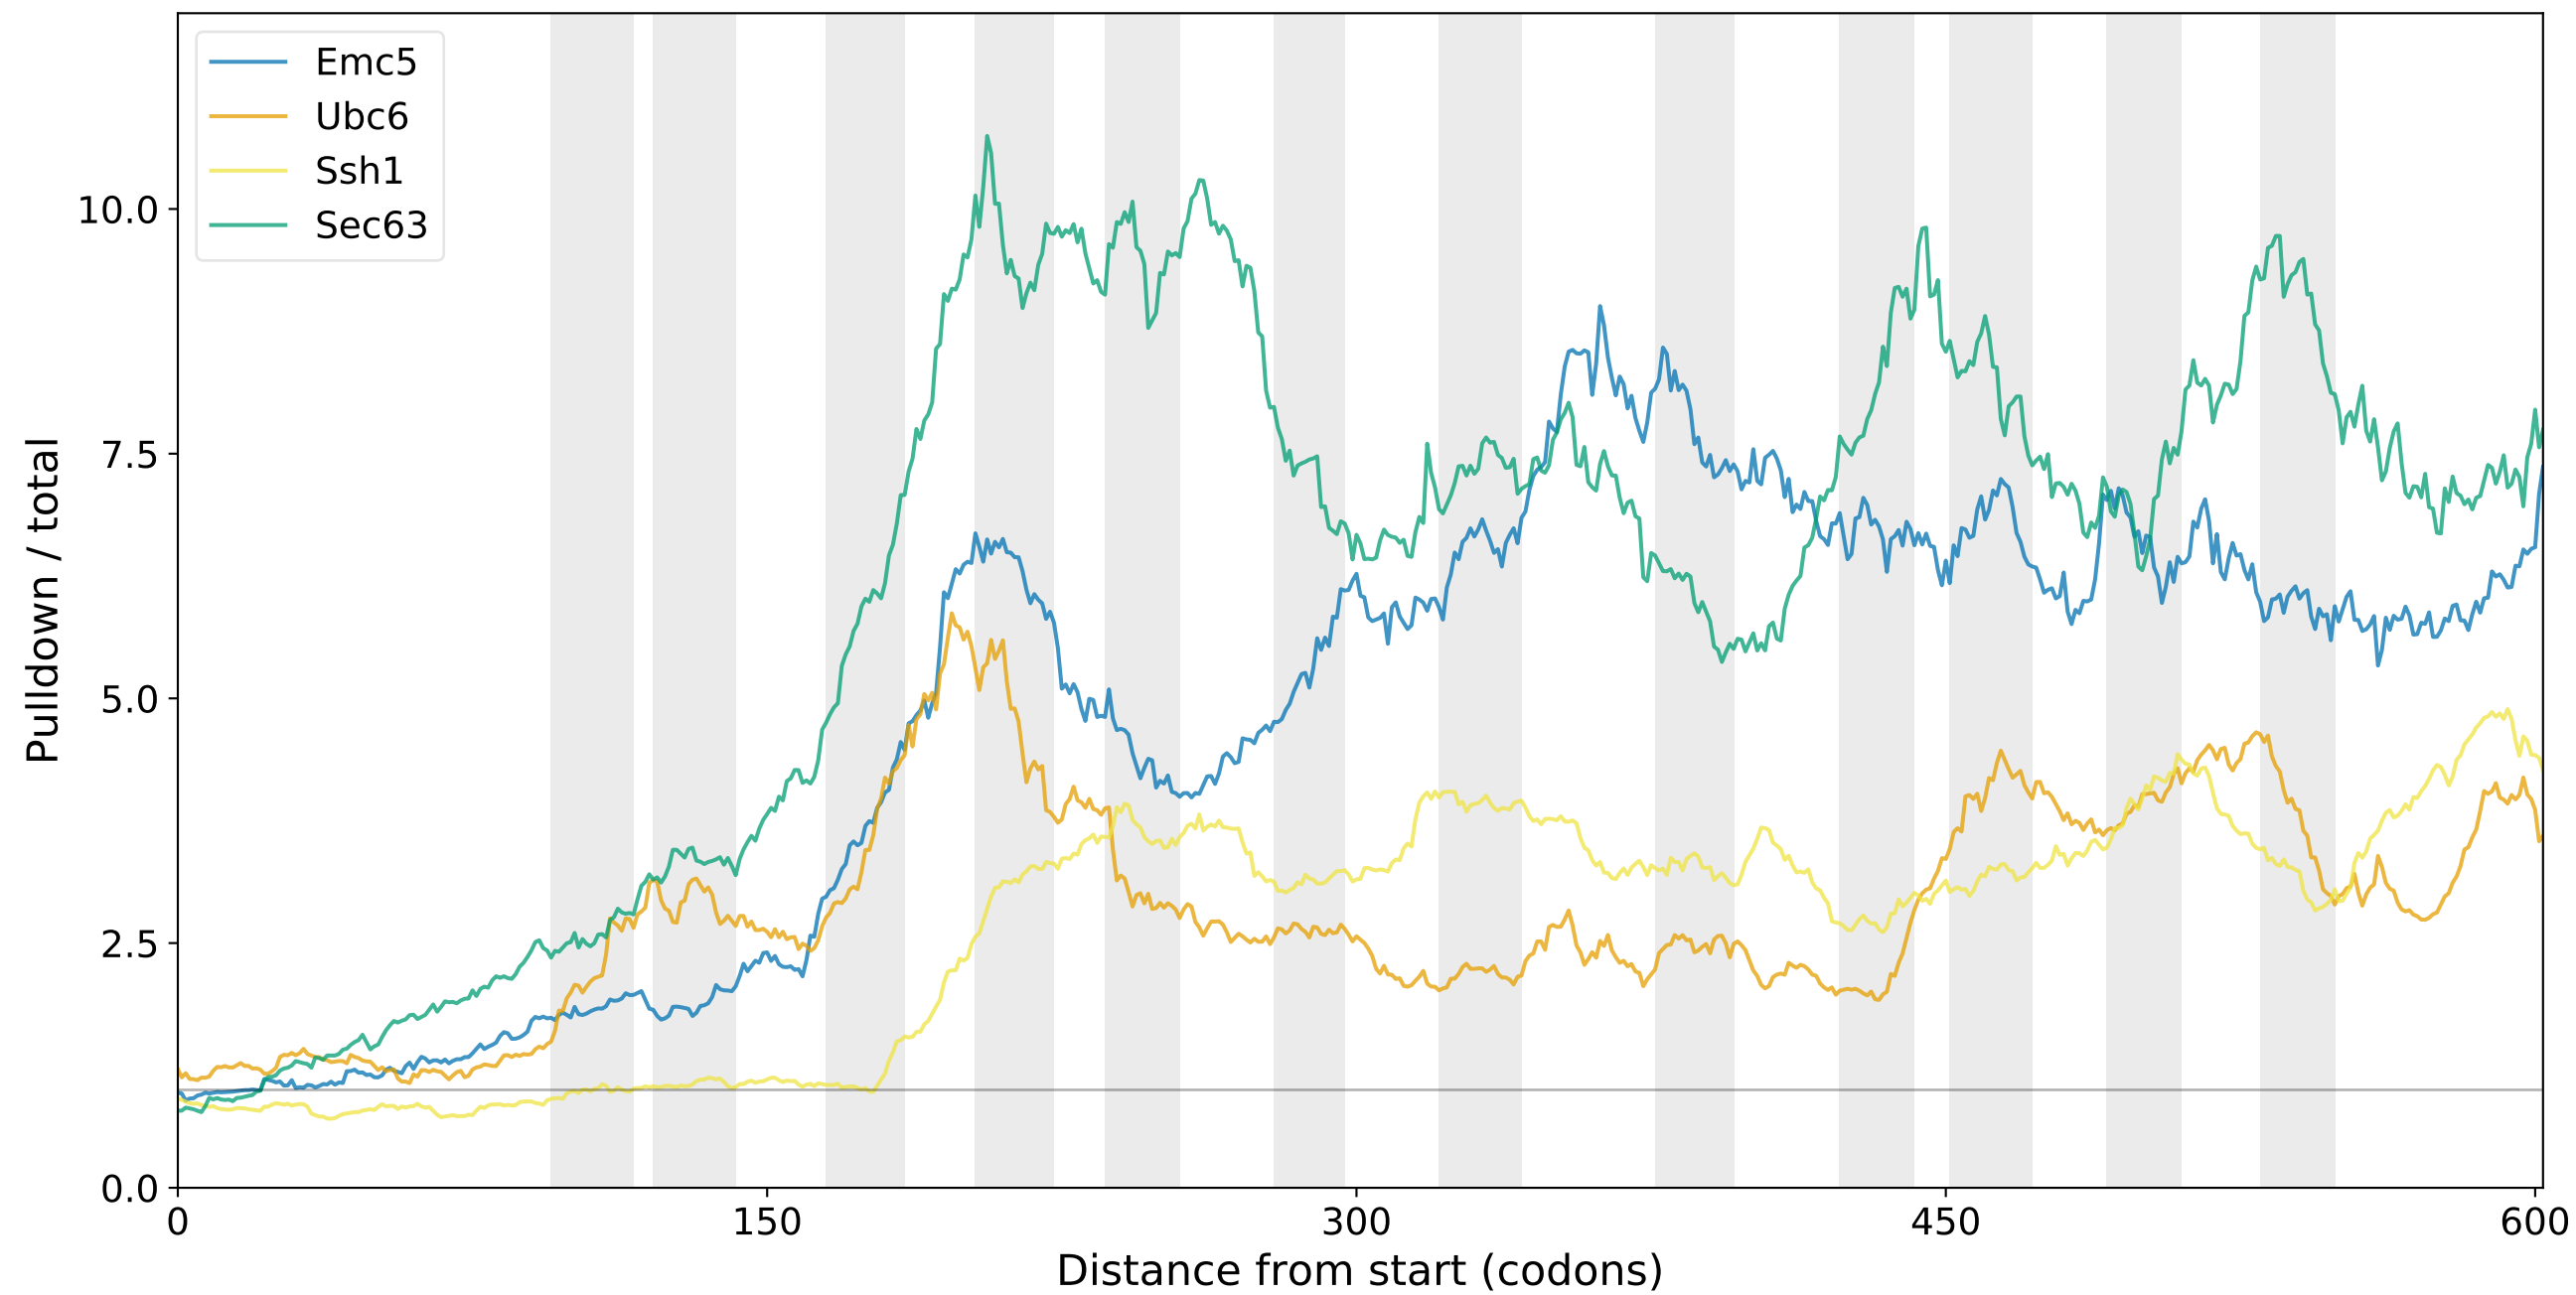

## YHL008C

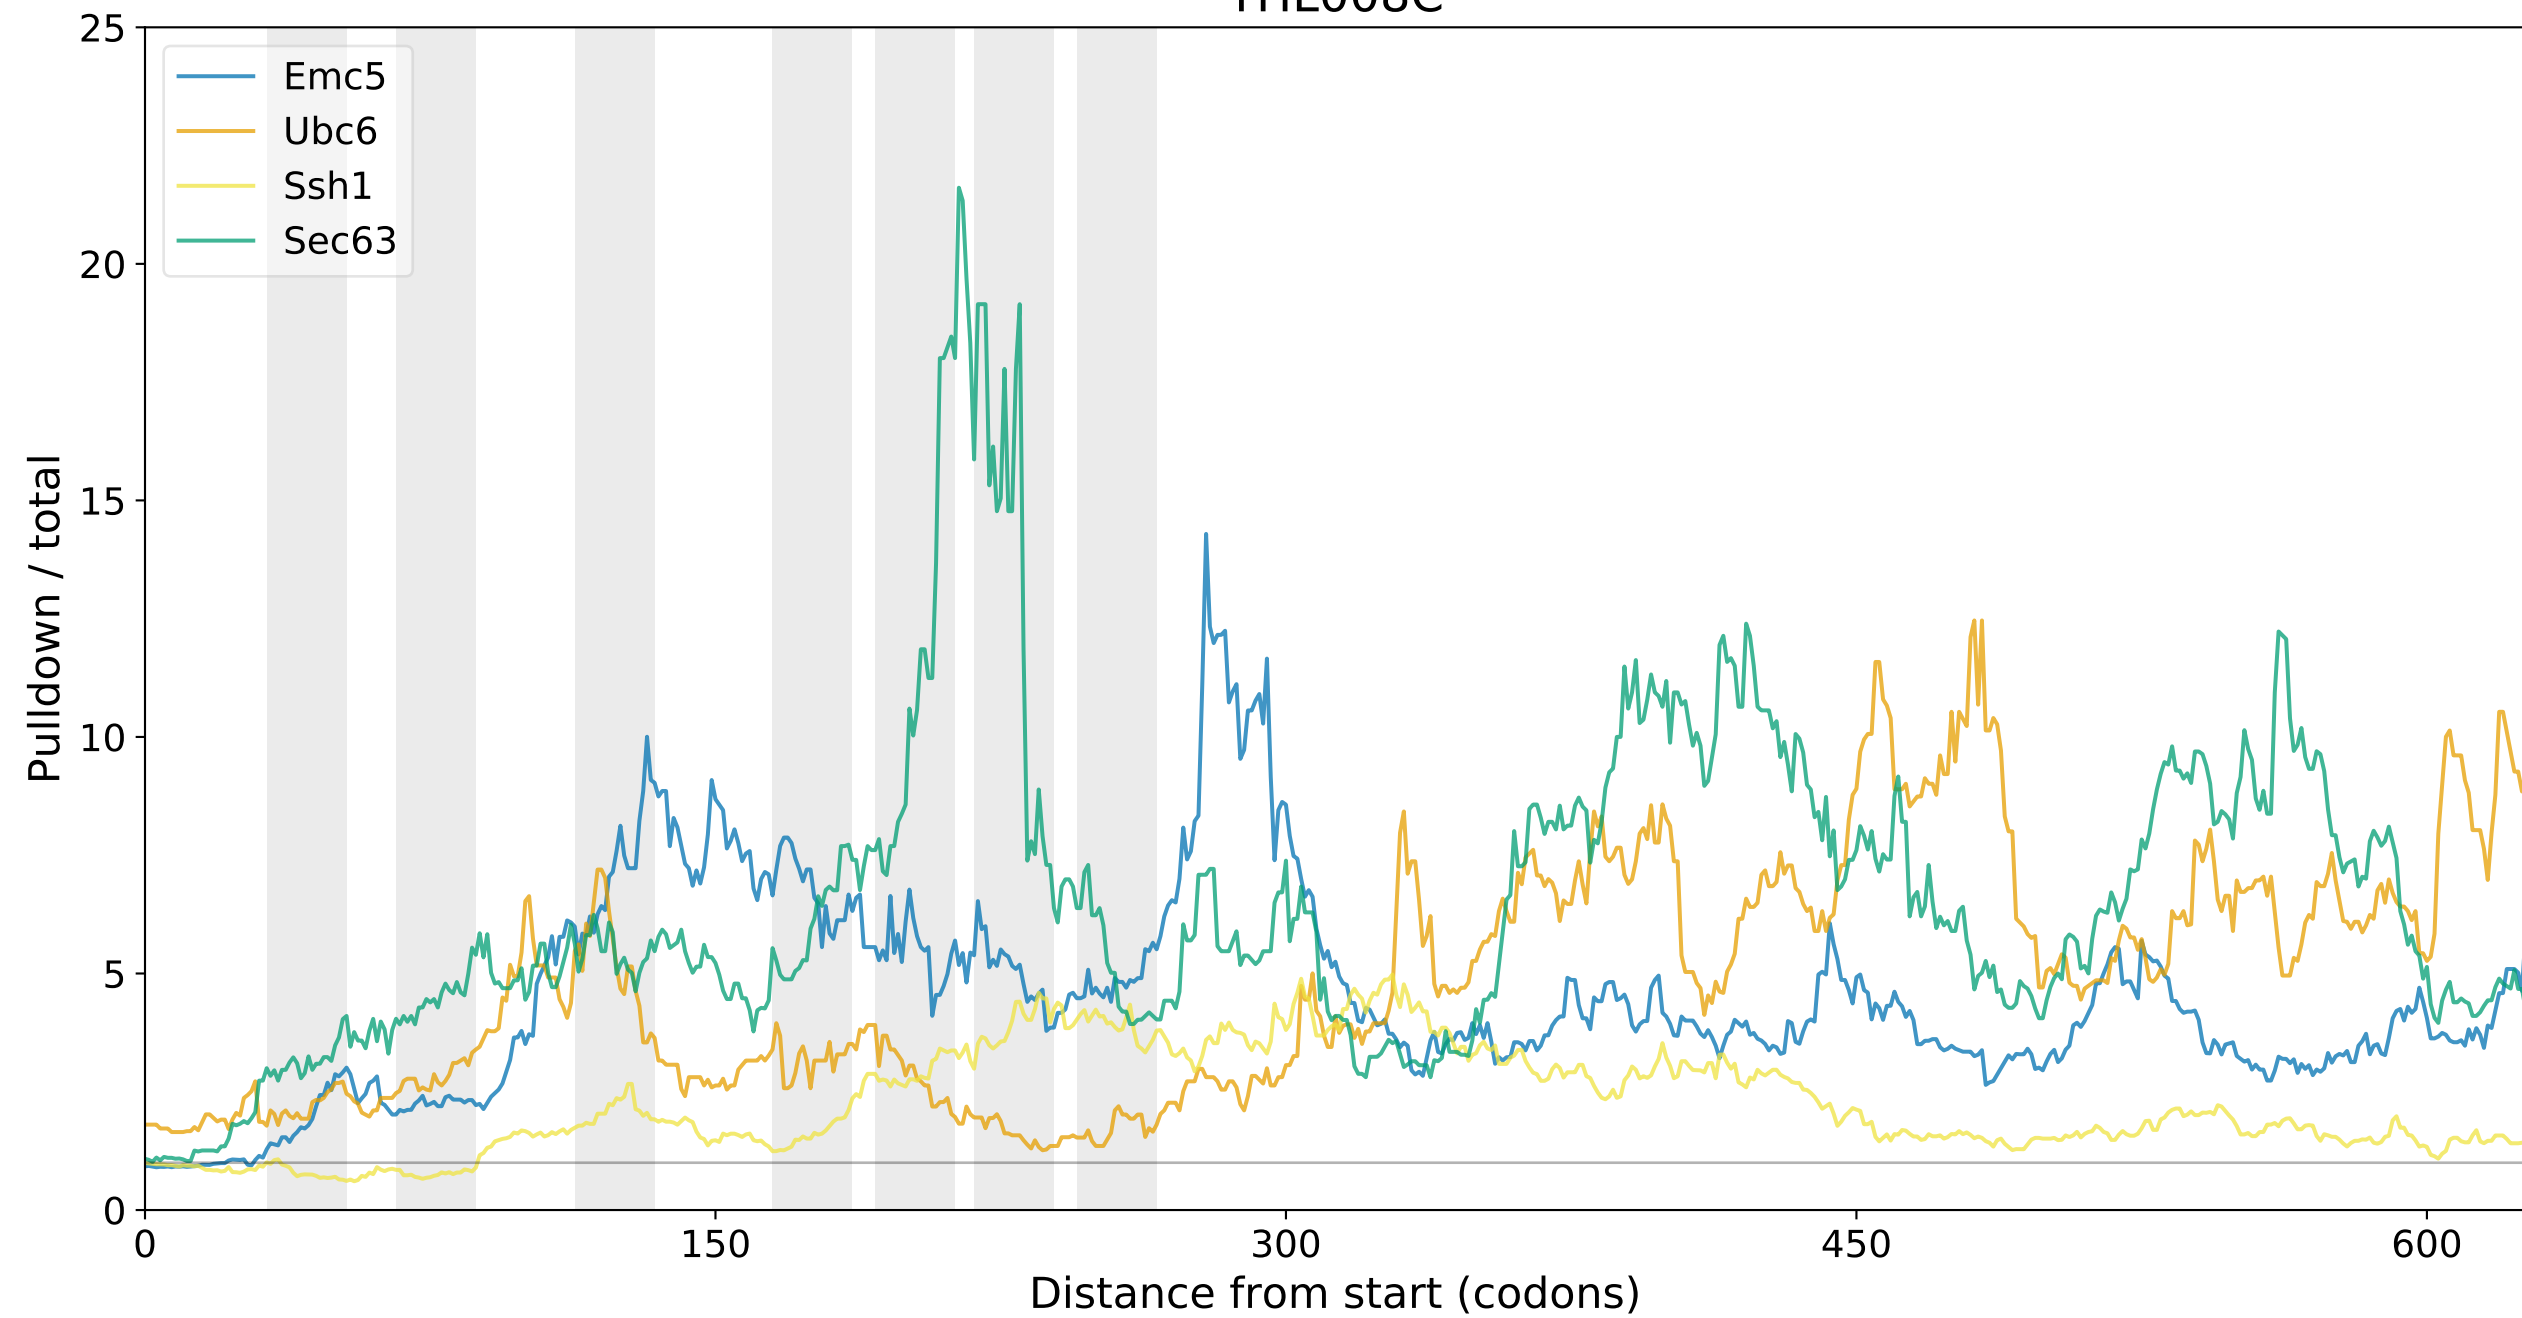

# SLY41

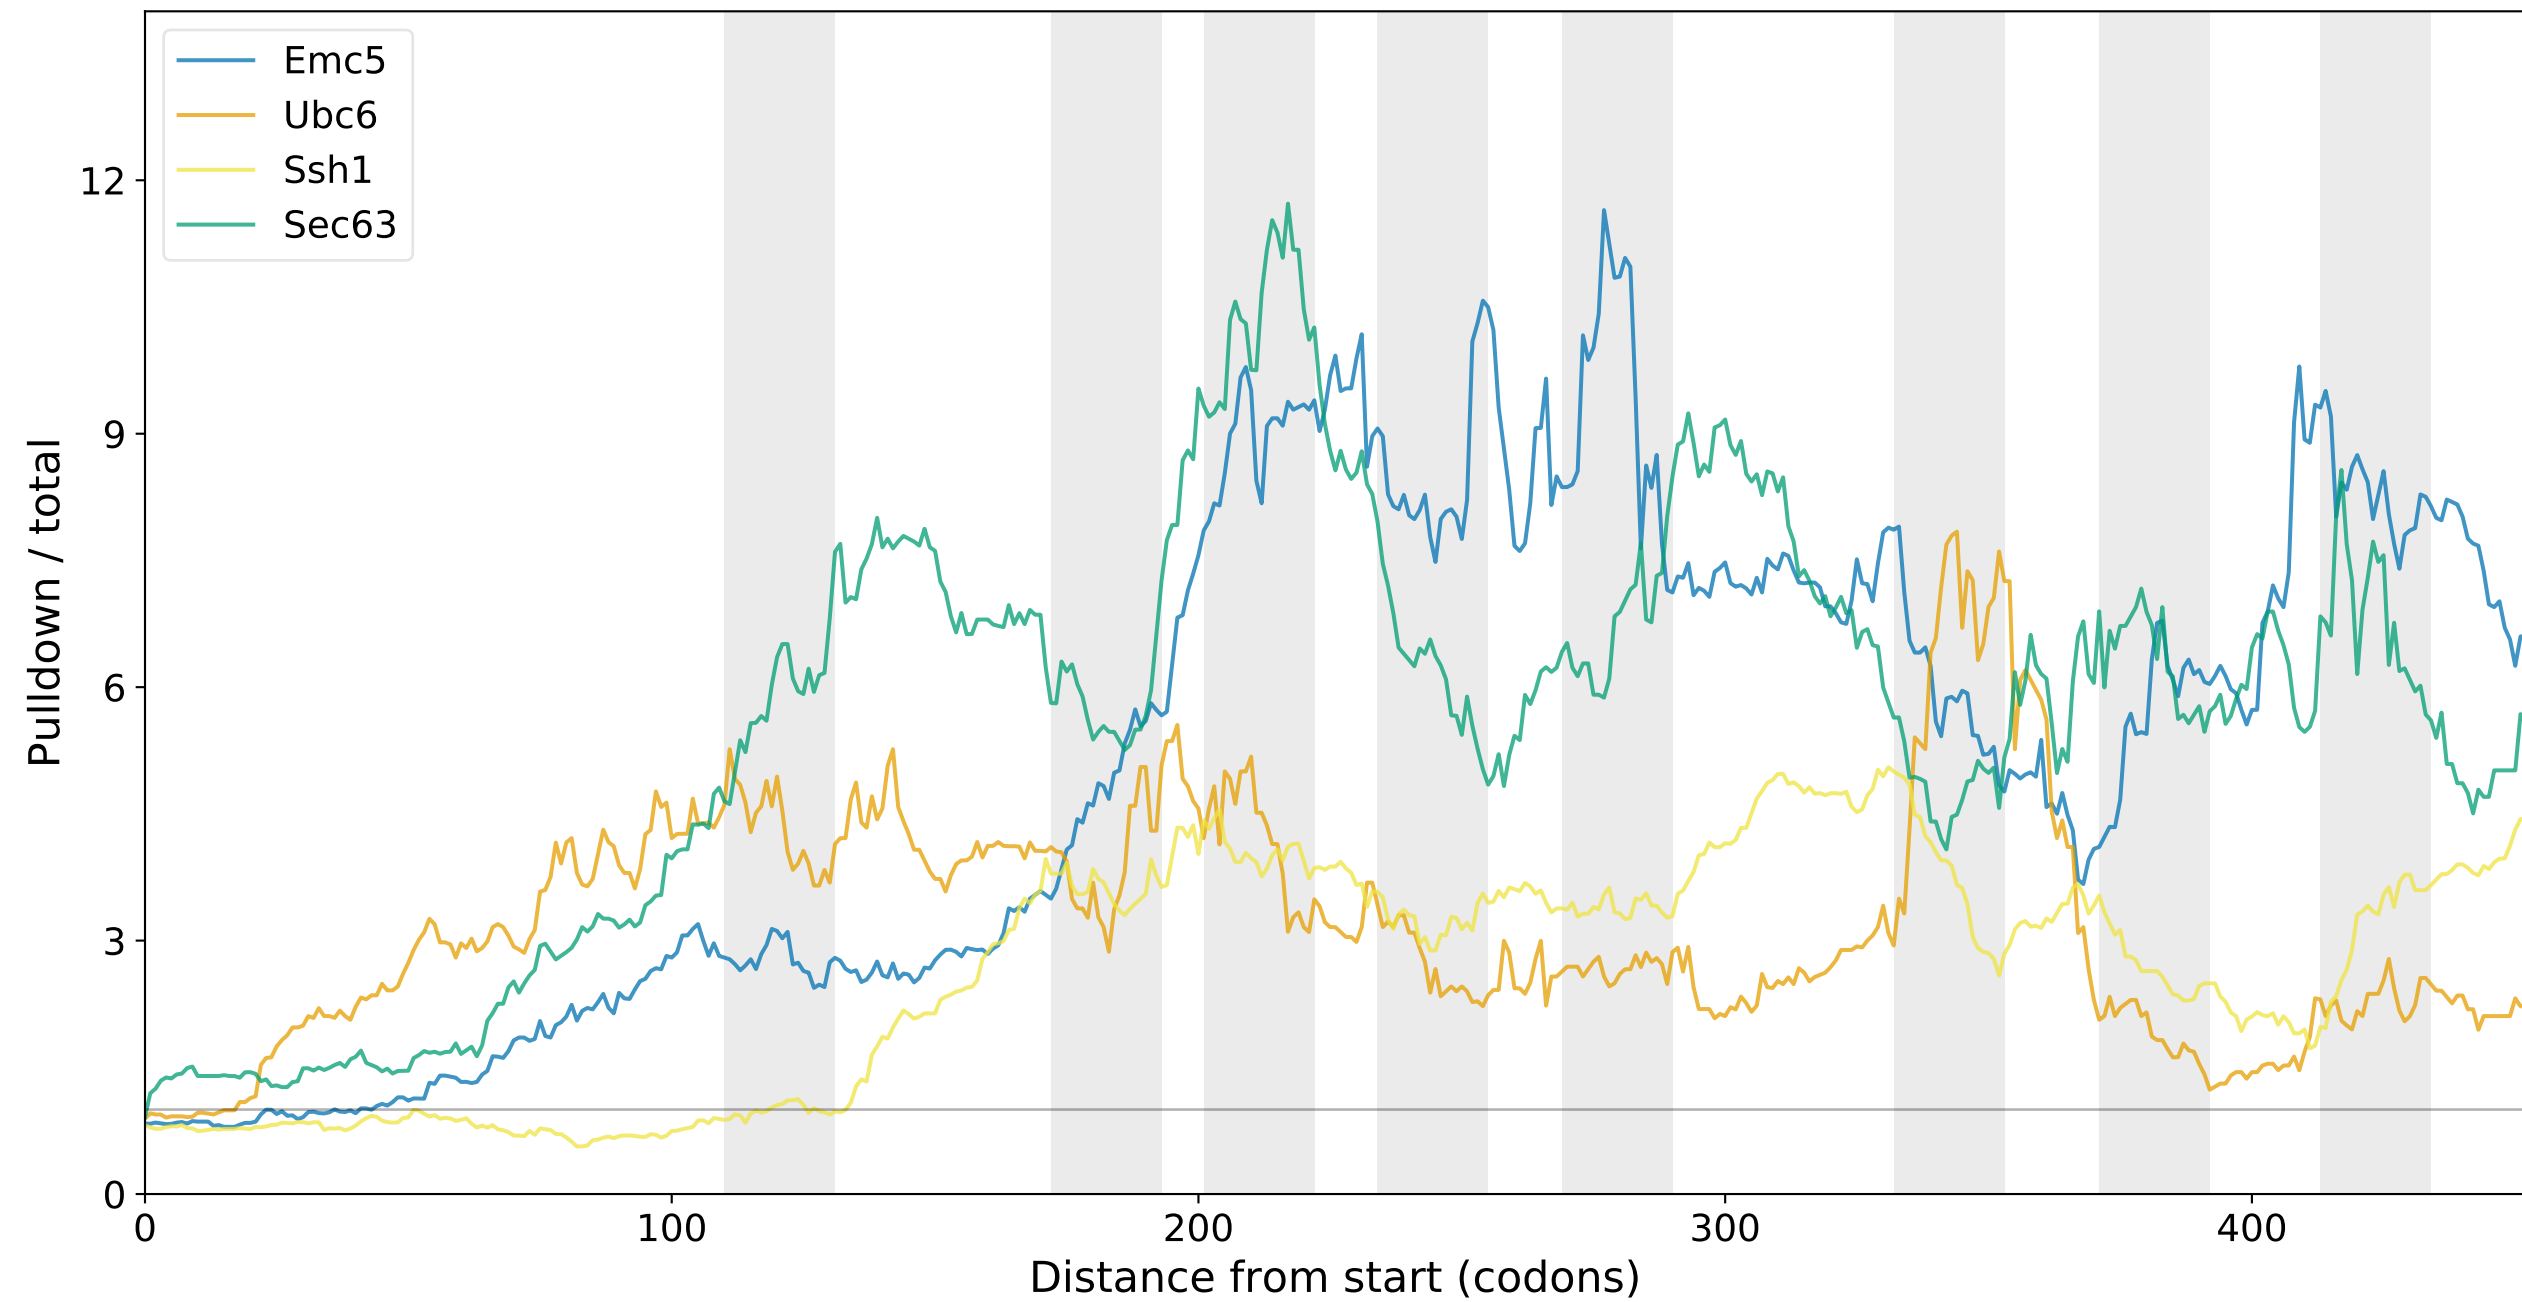

# PDR5

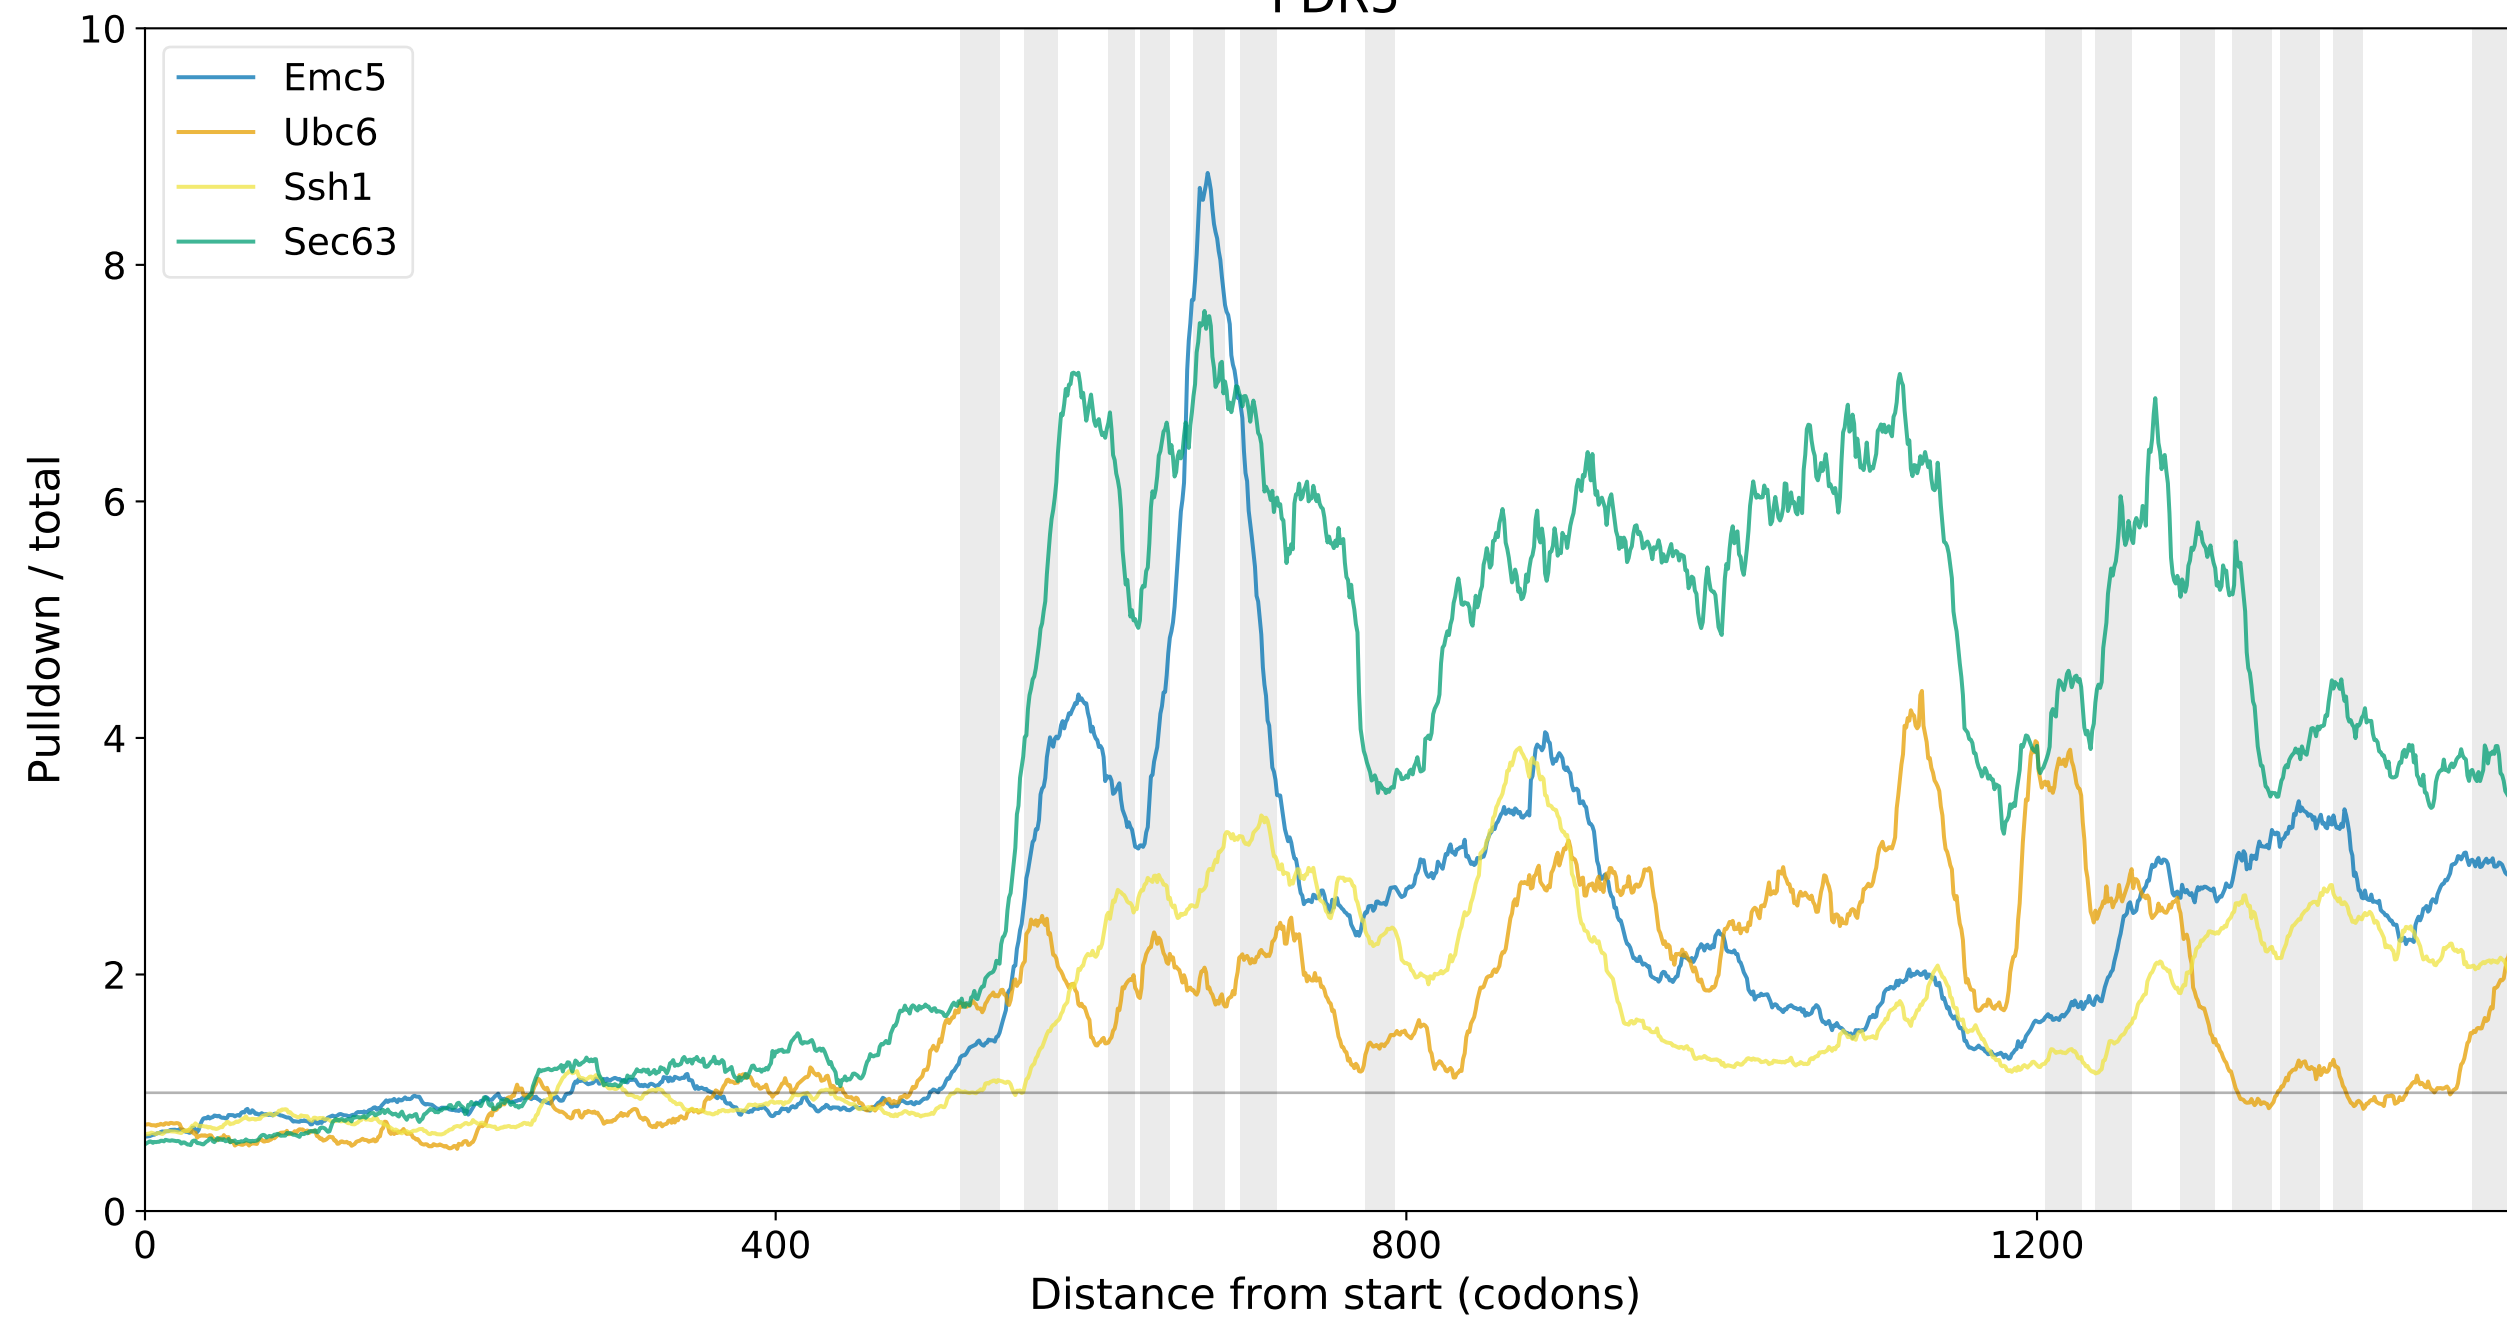

# ALG6

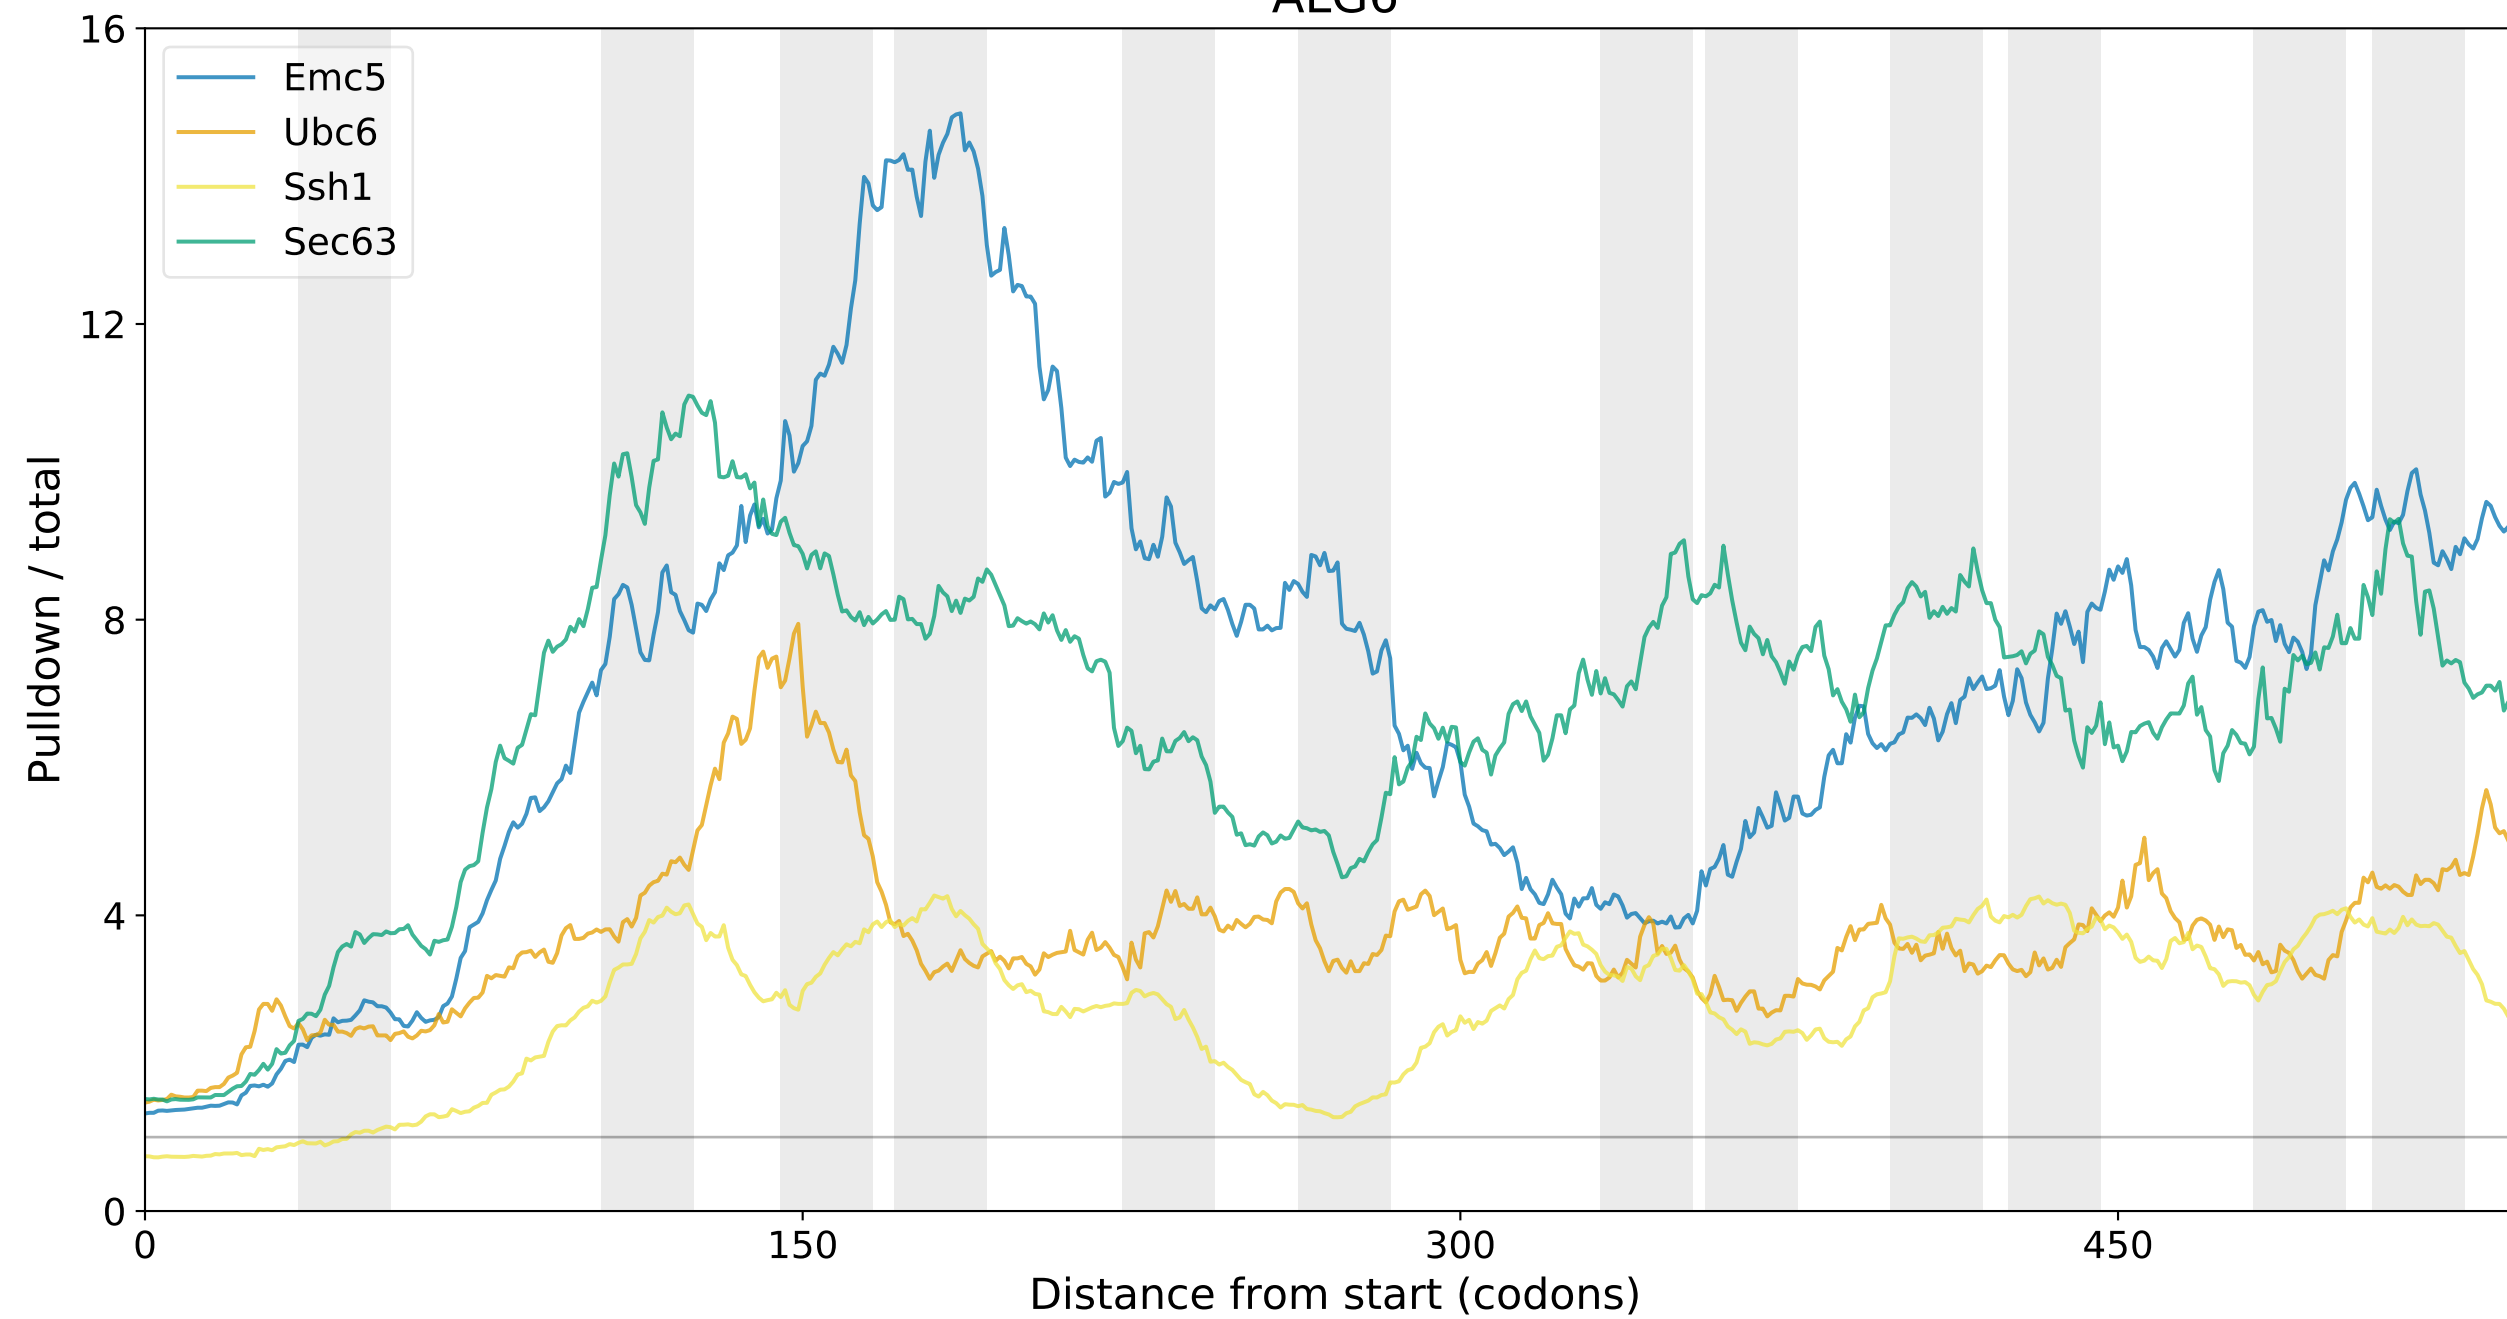

# ALG8

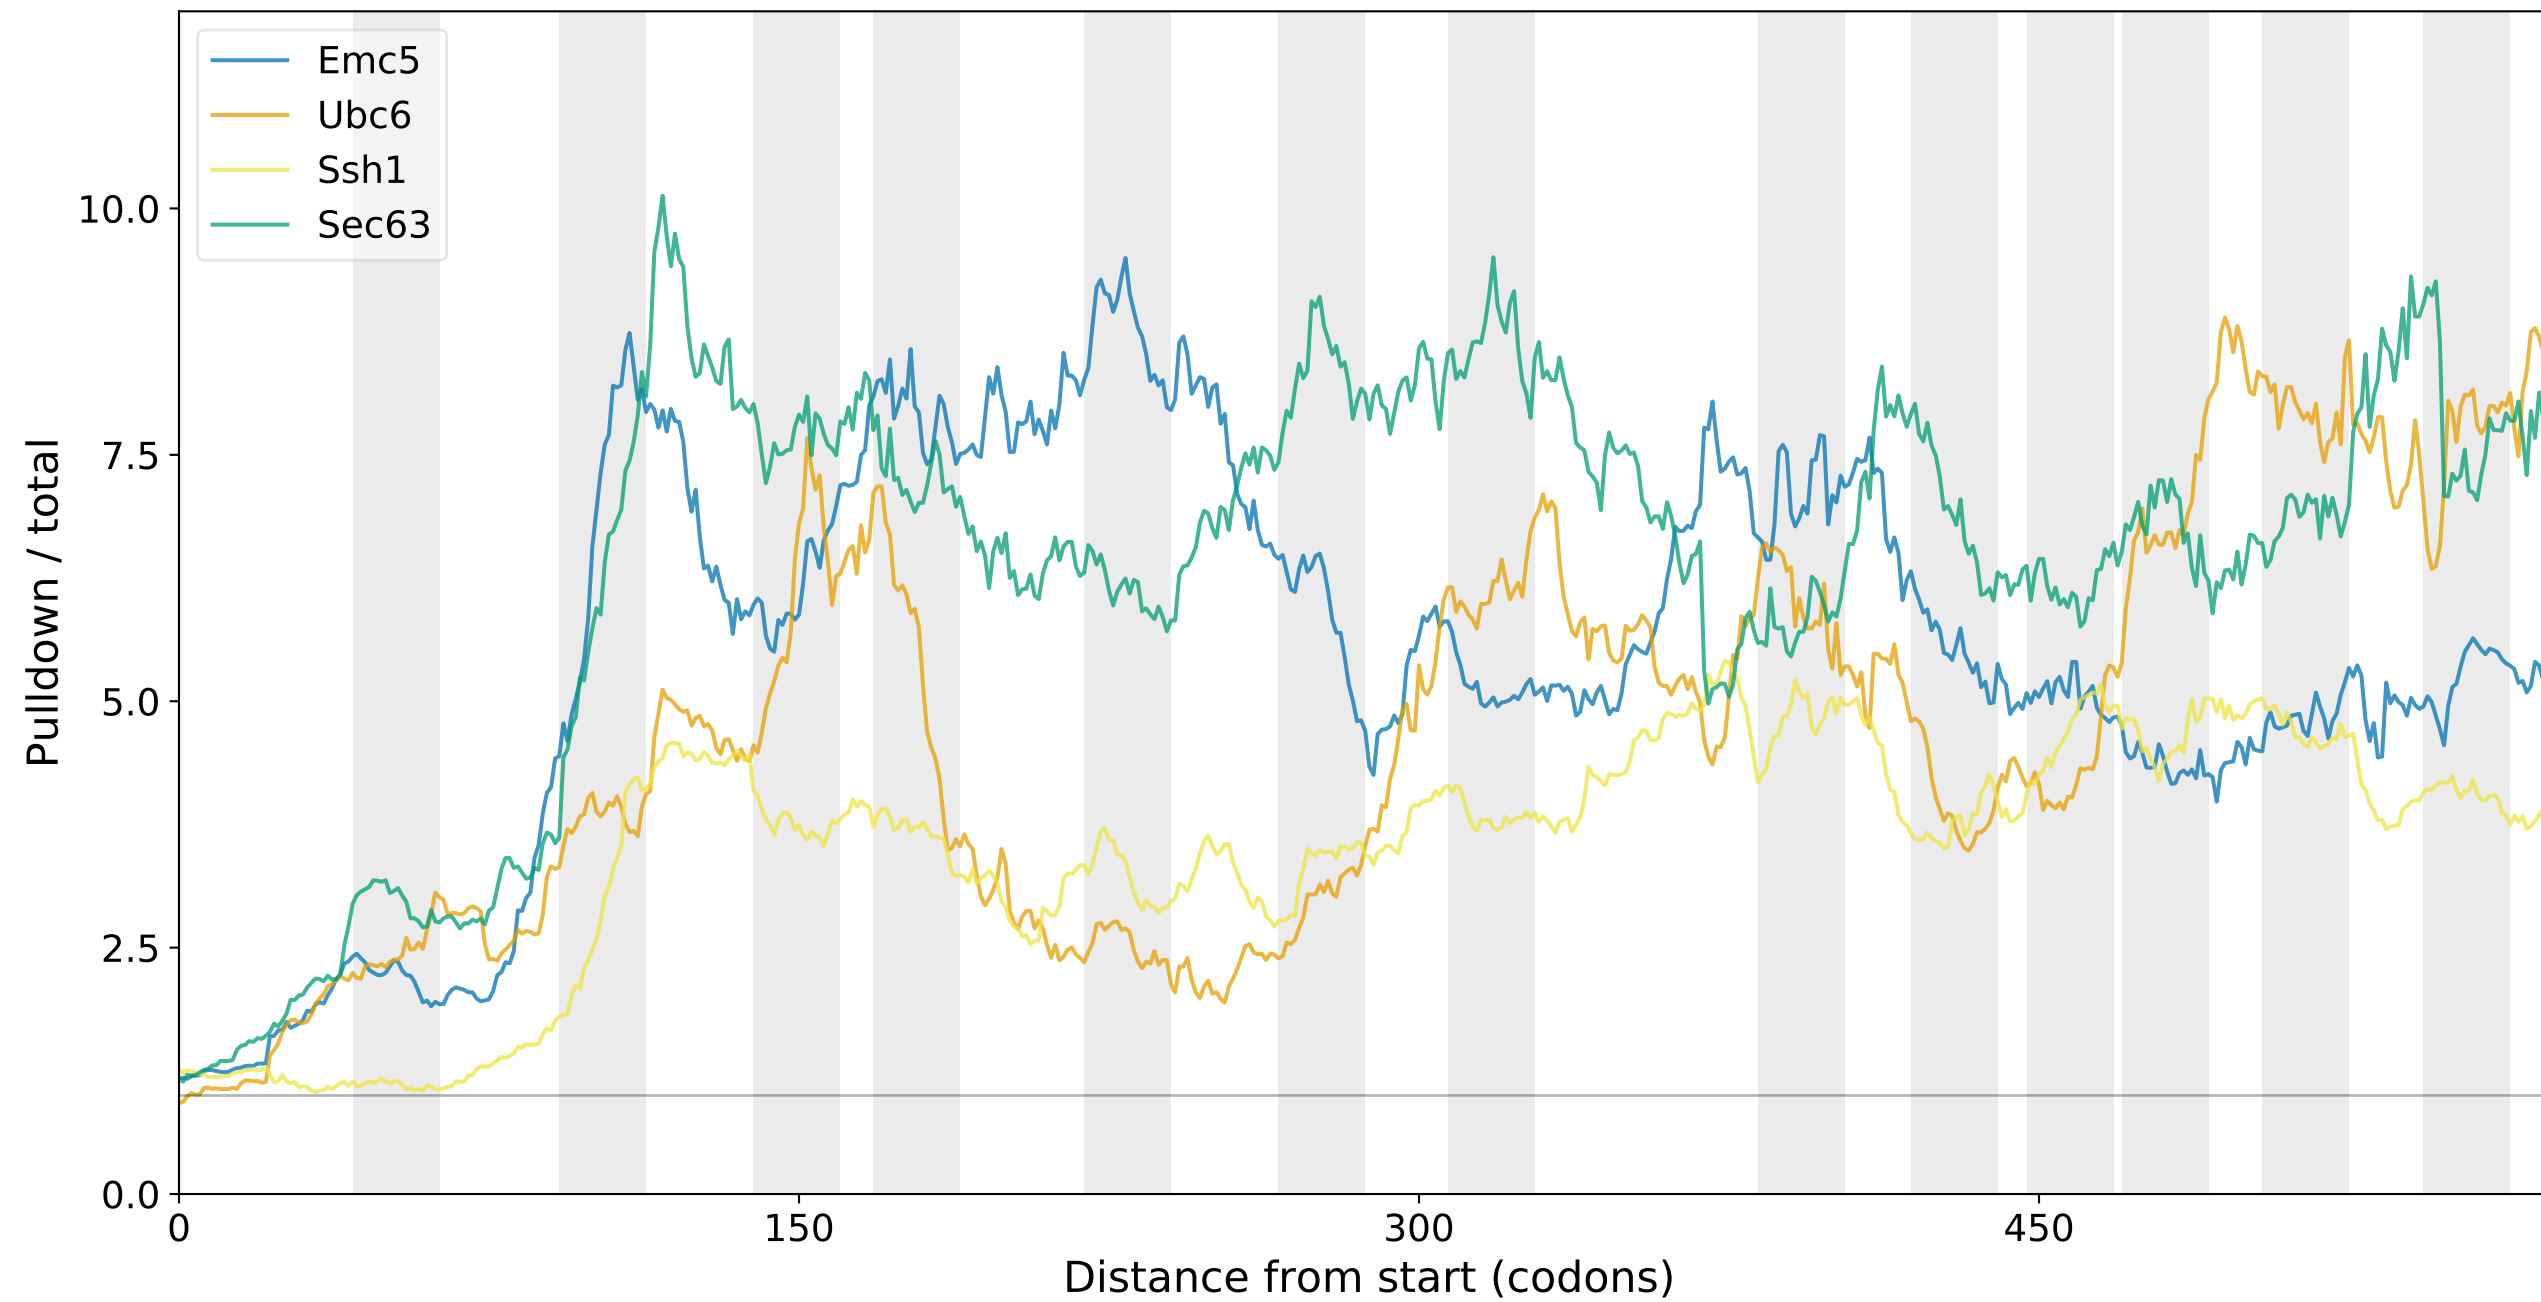



# ZSP1

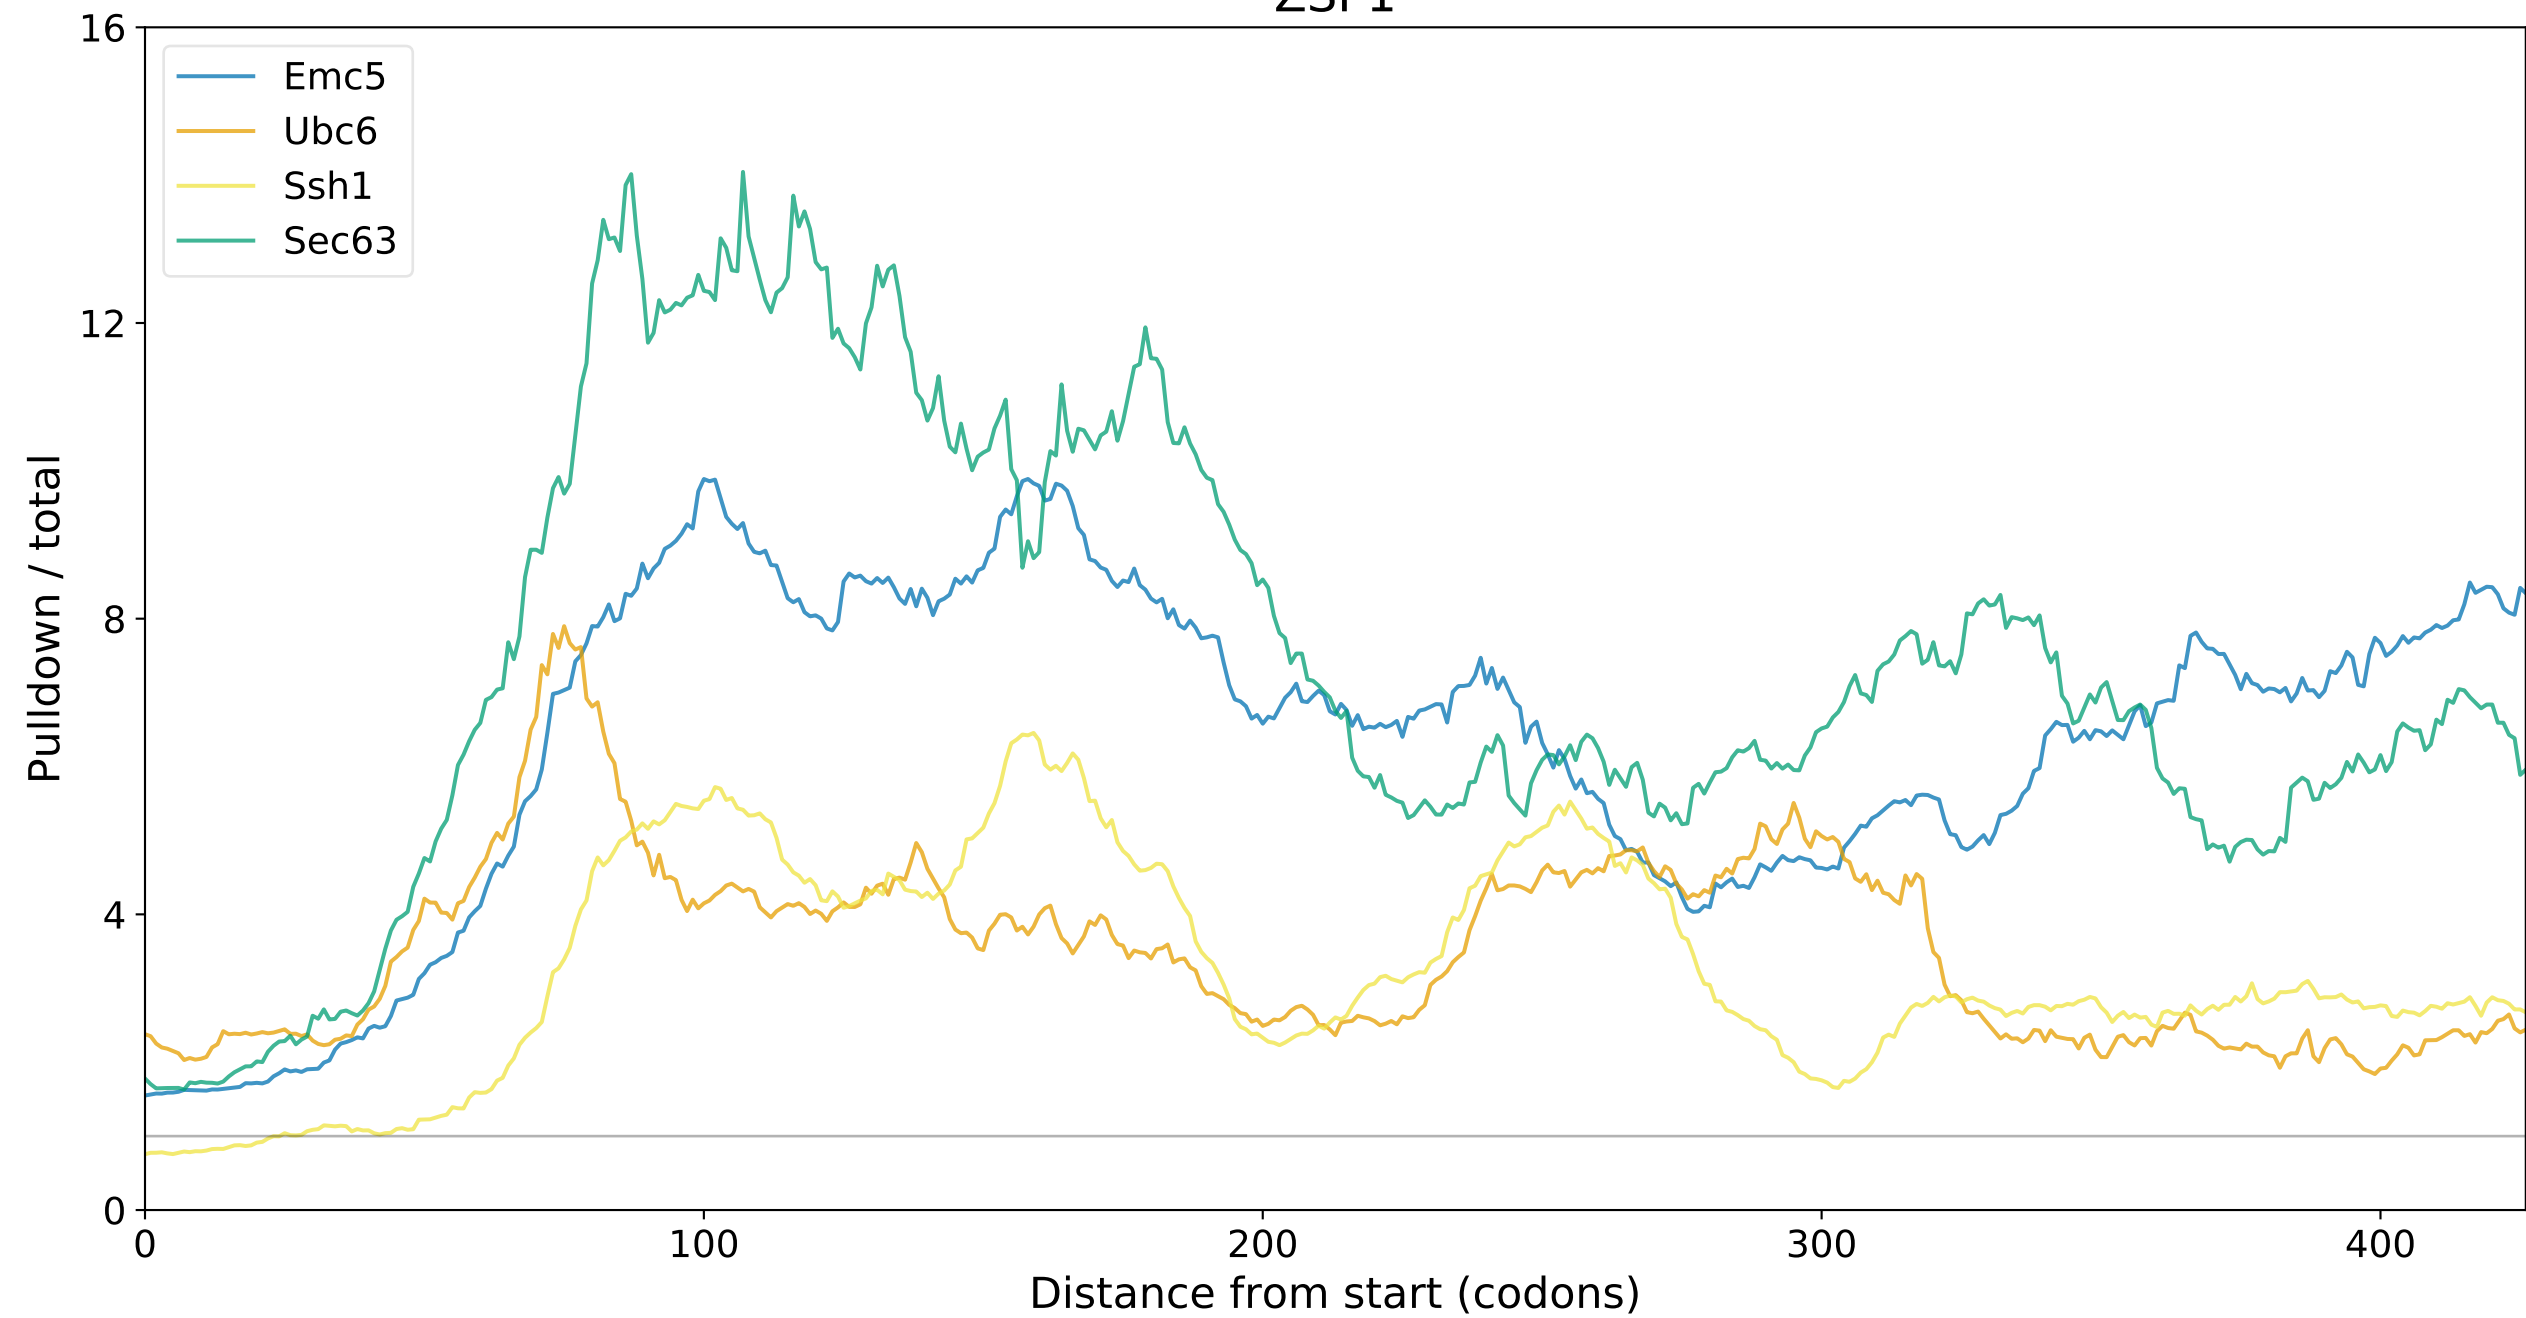

# TDA5

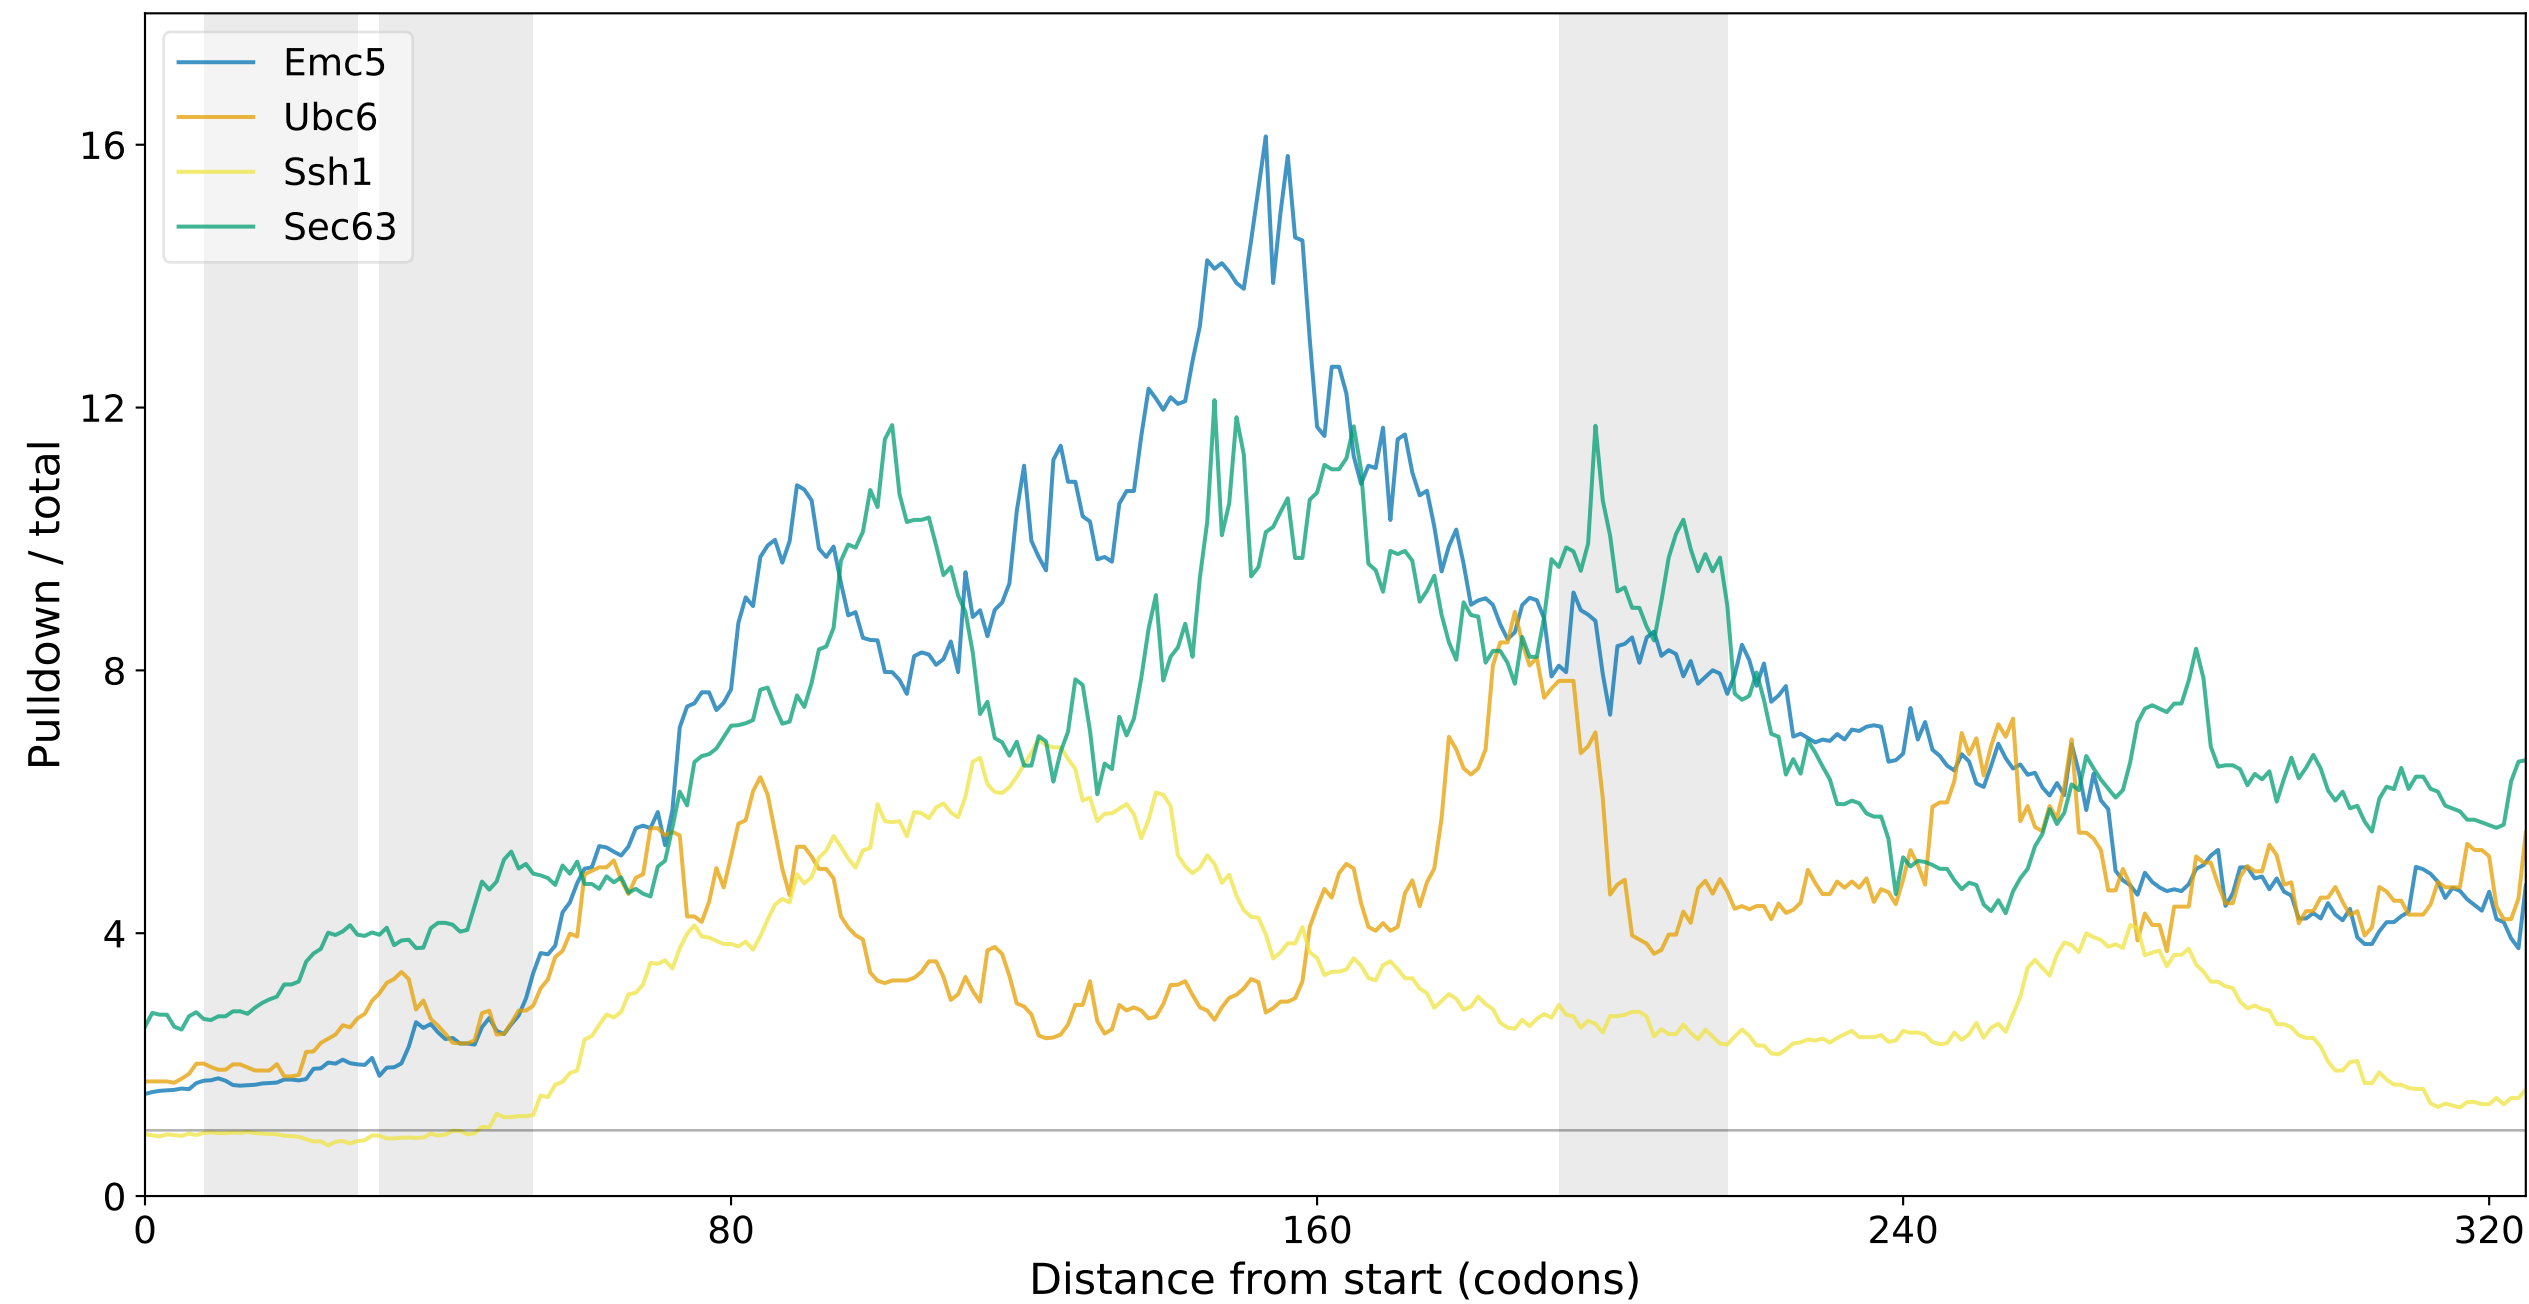

# PHO87

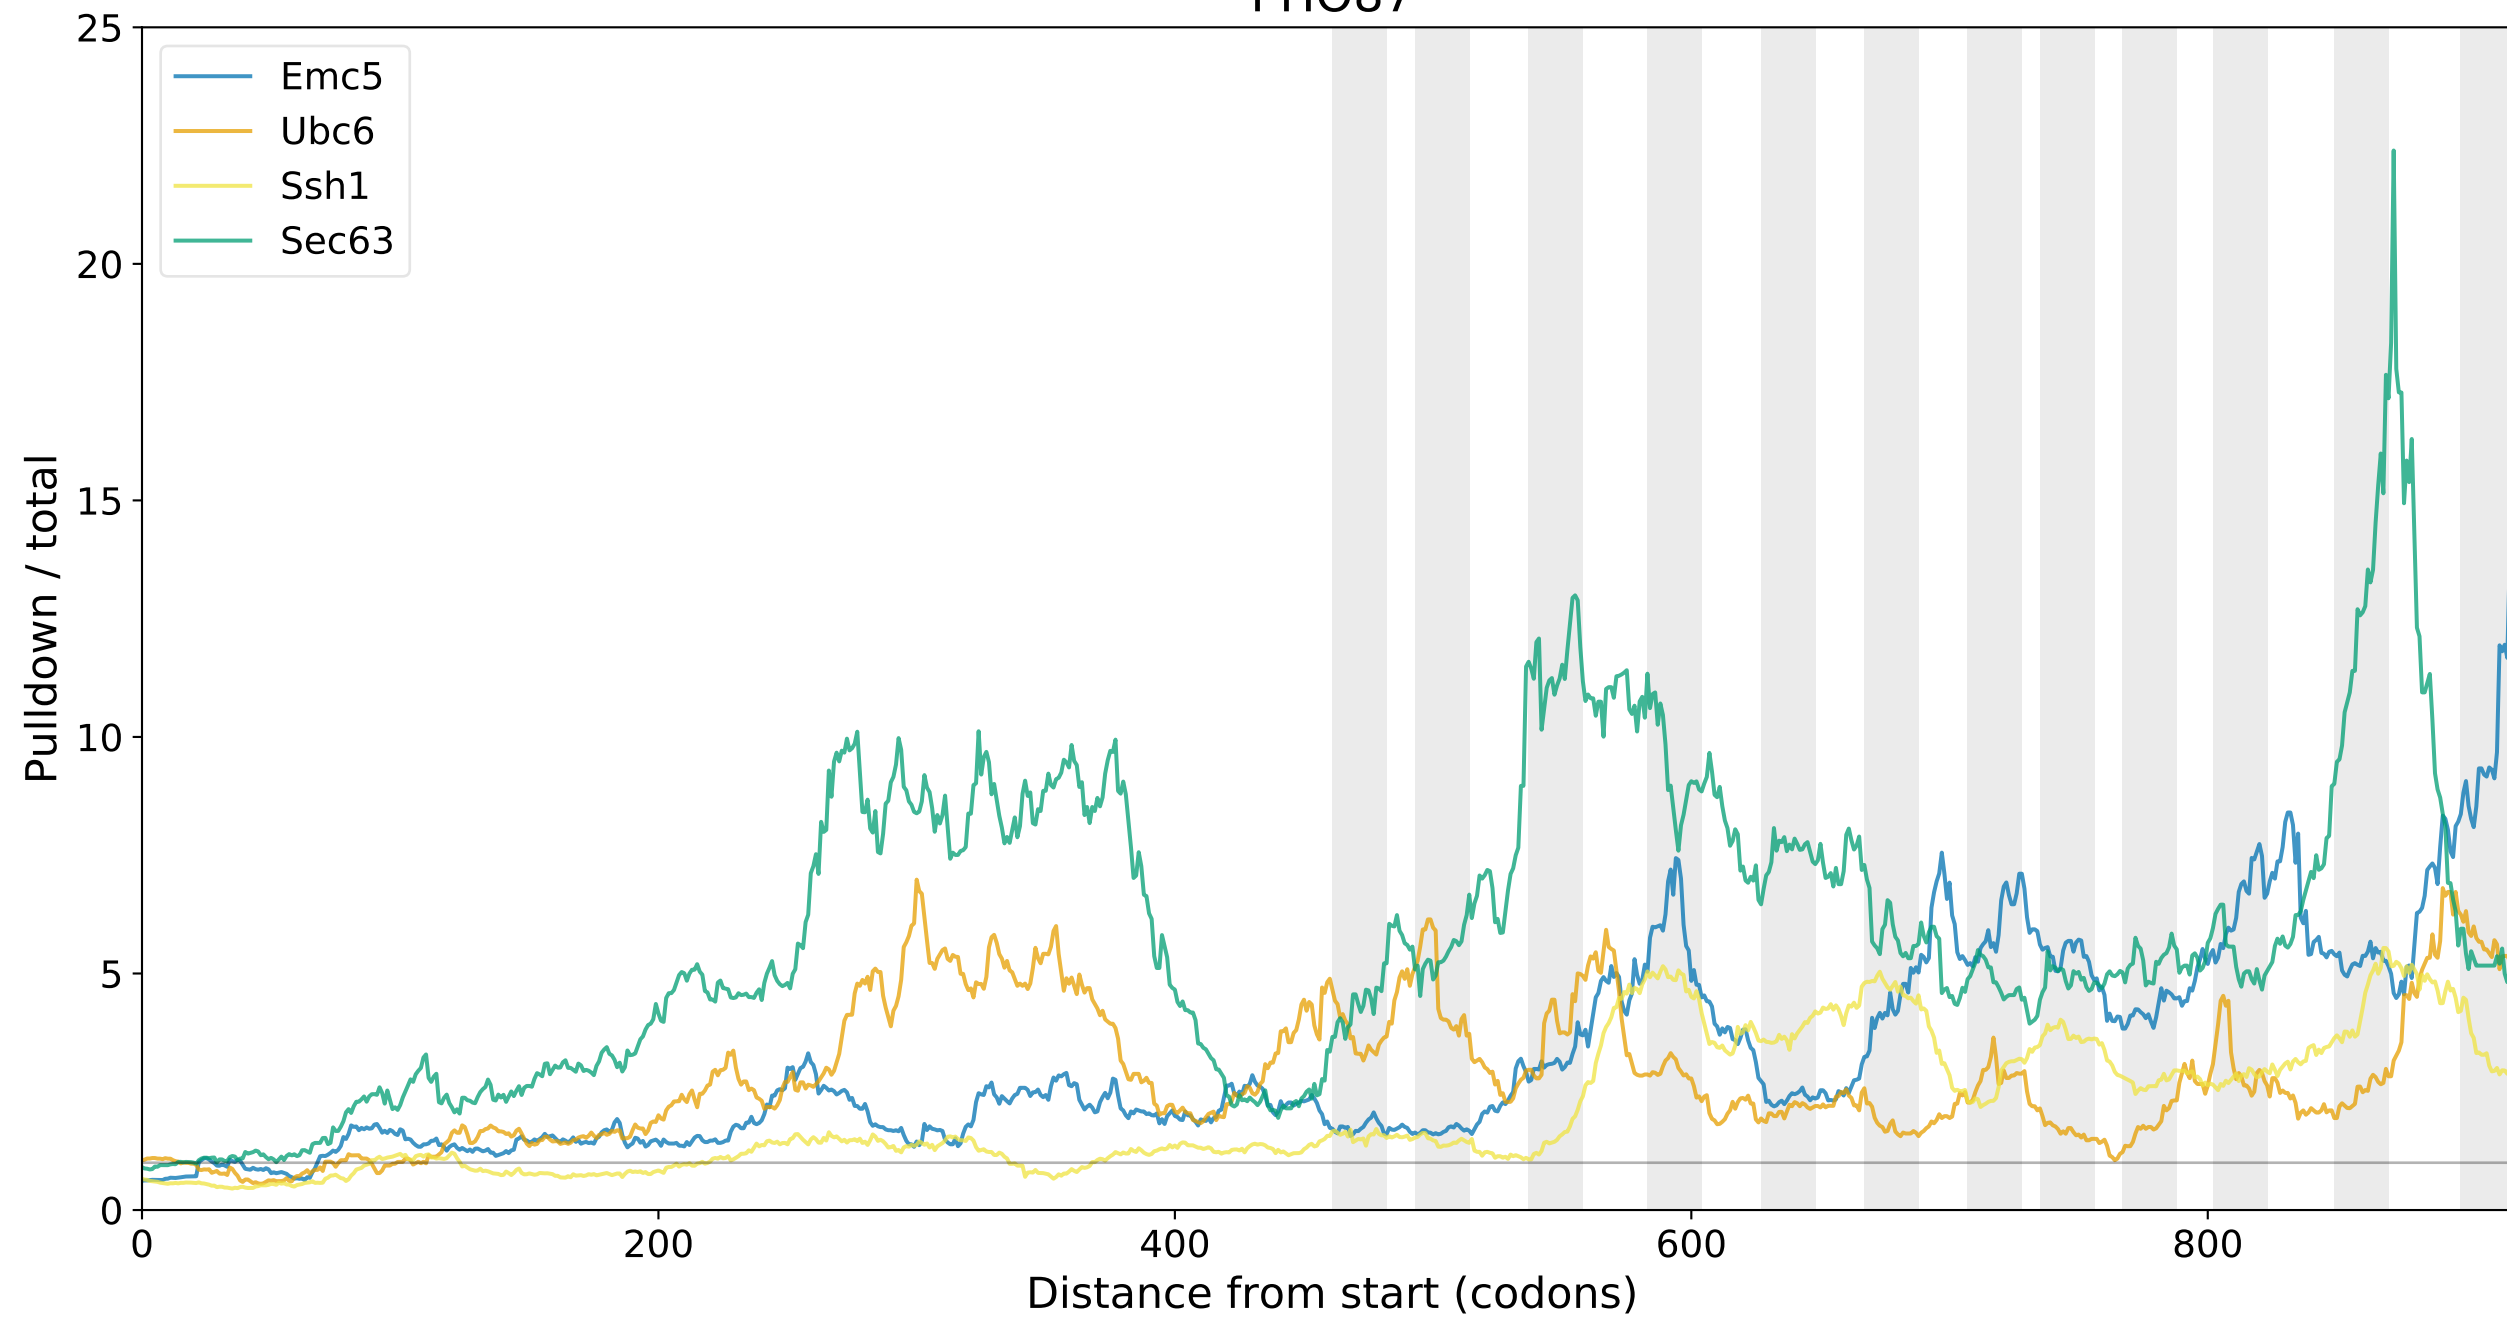

# OPT1

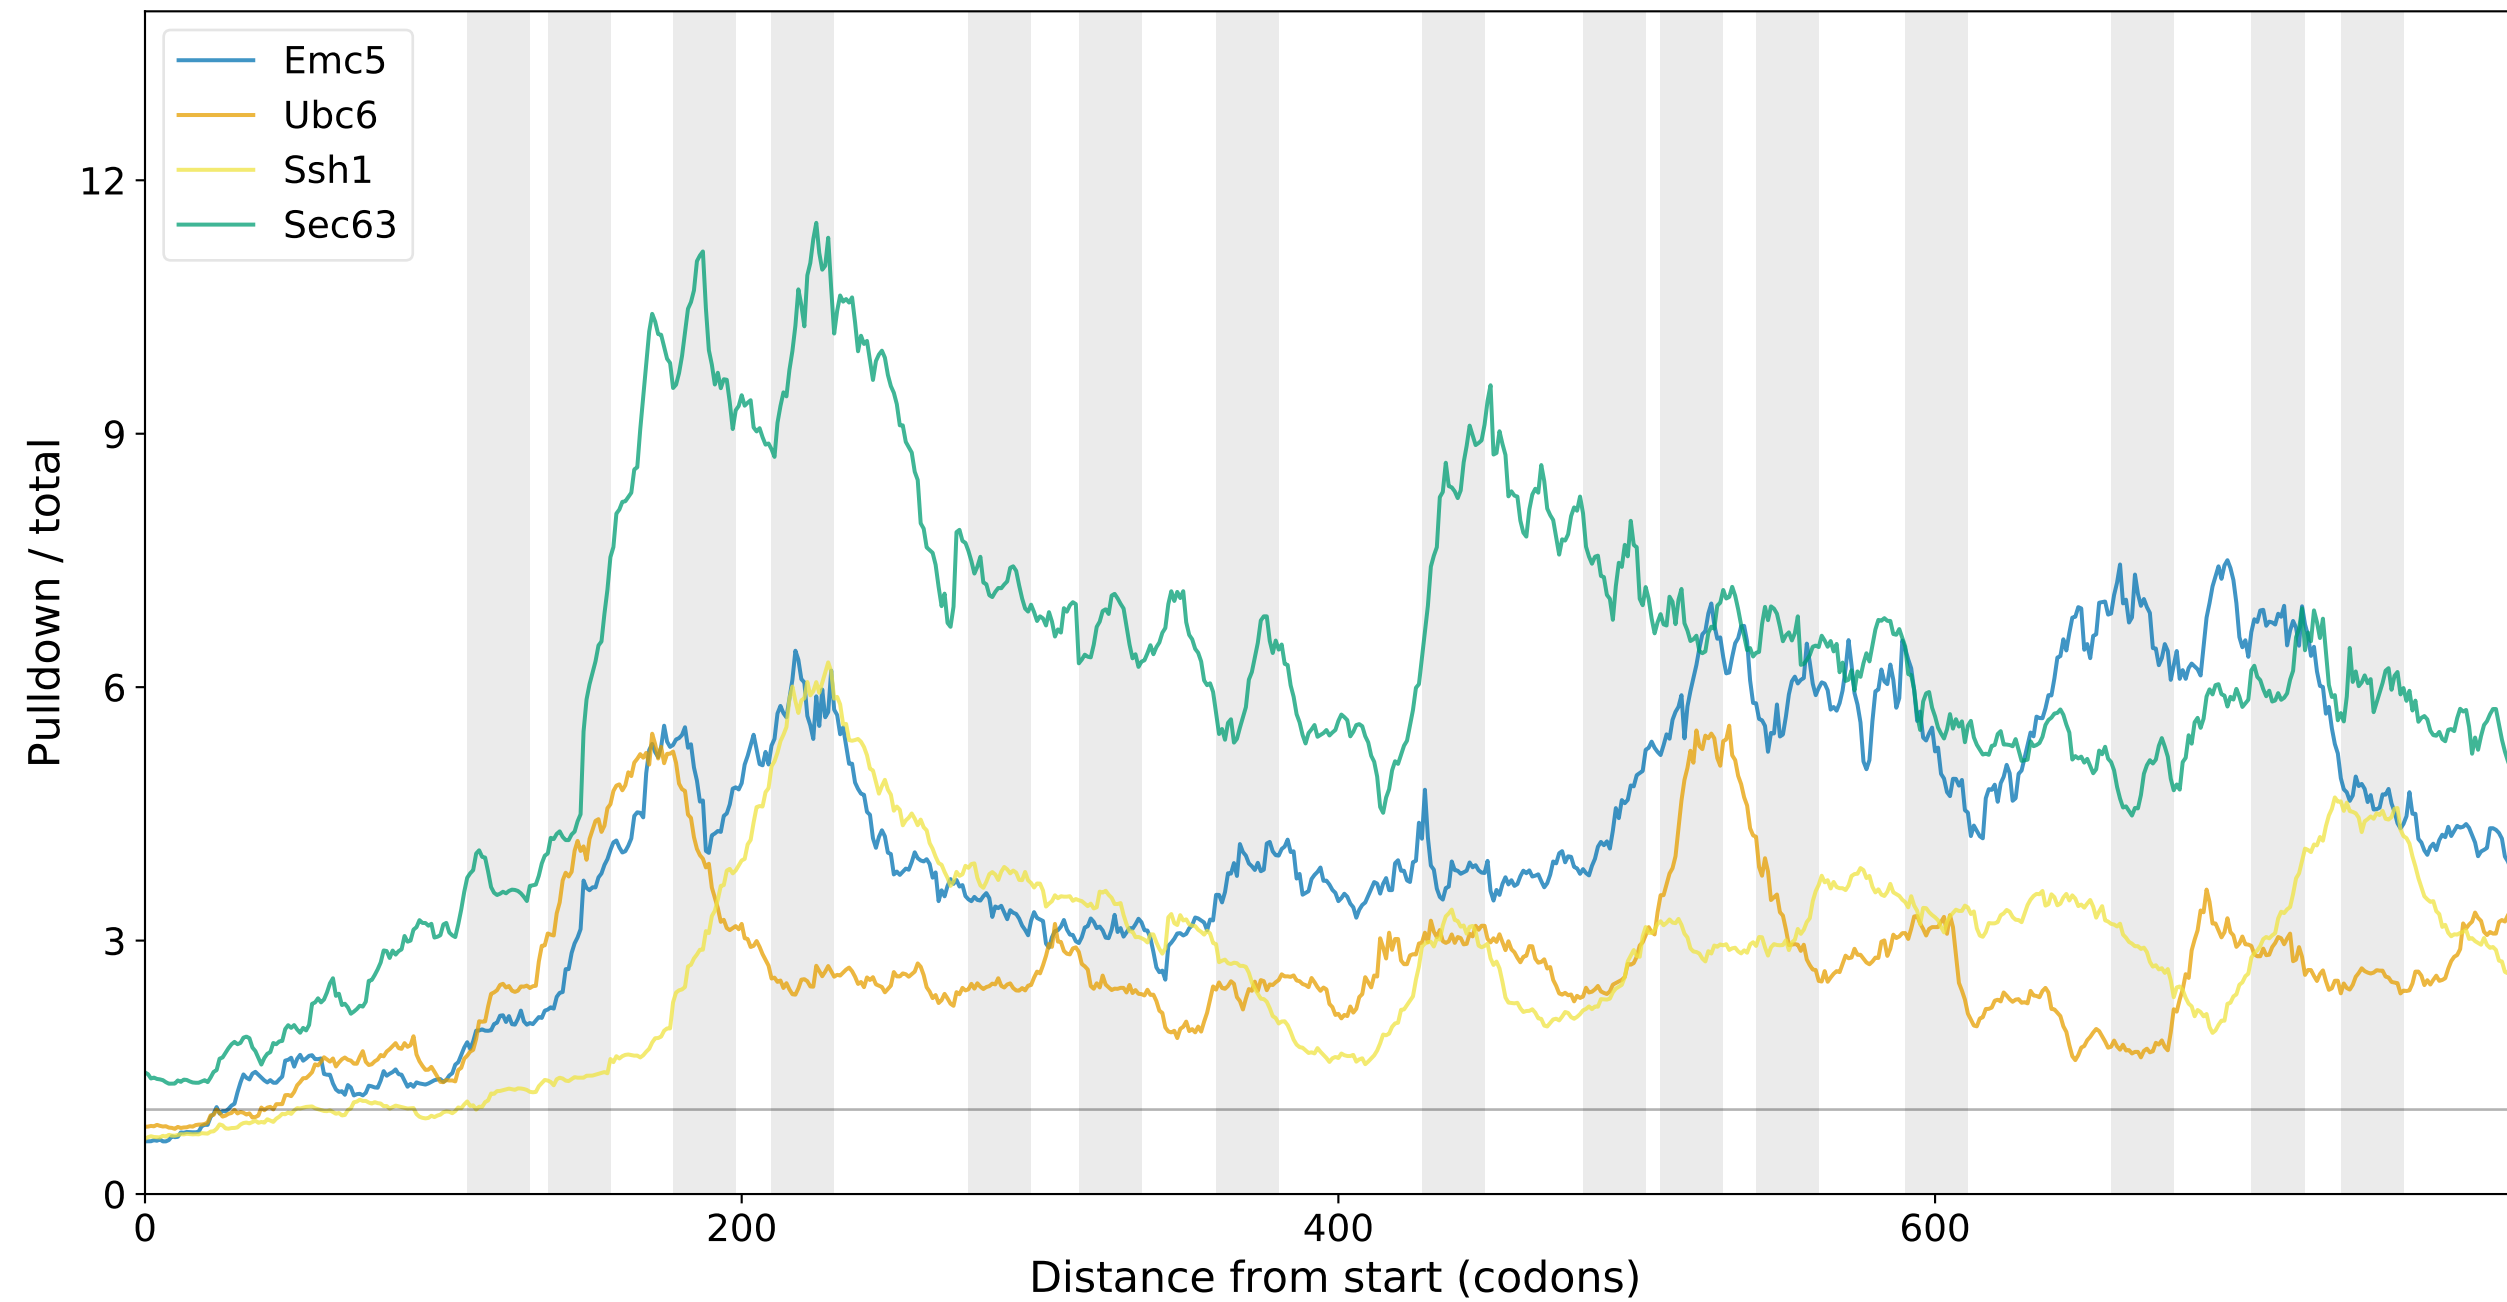

# DNF1

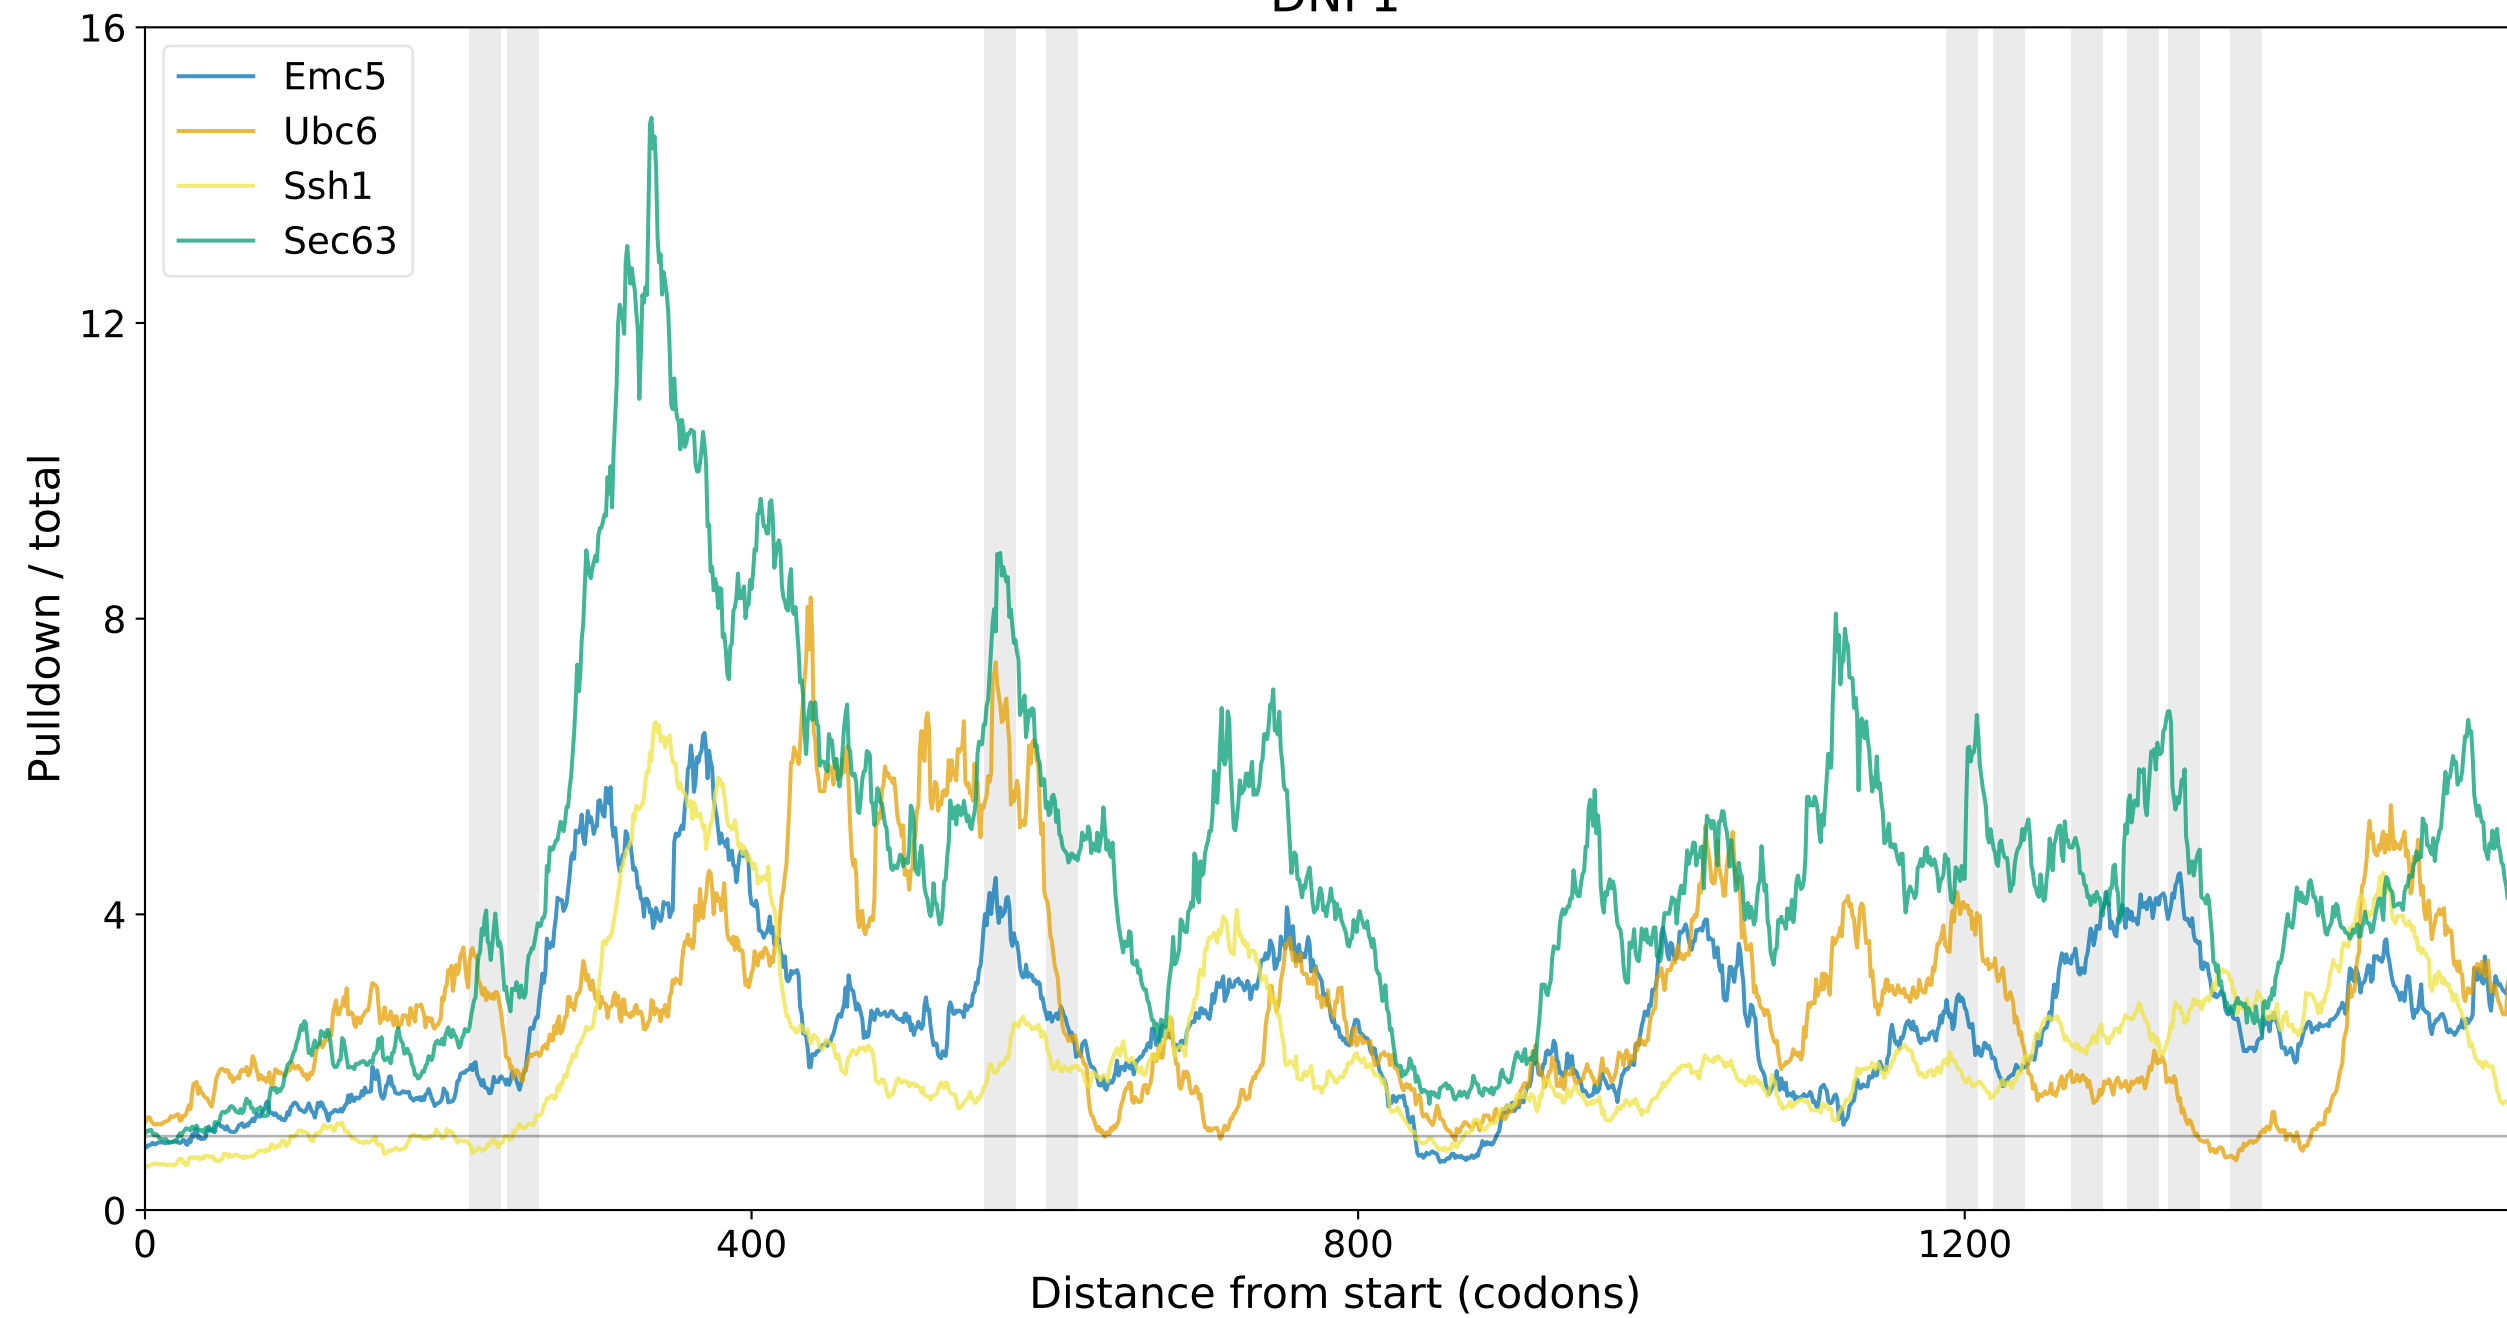

# BSC6

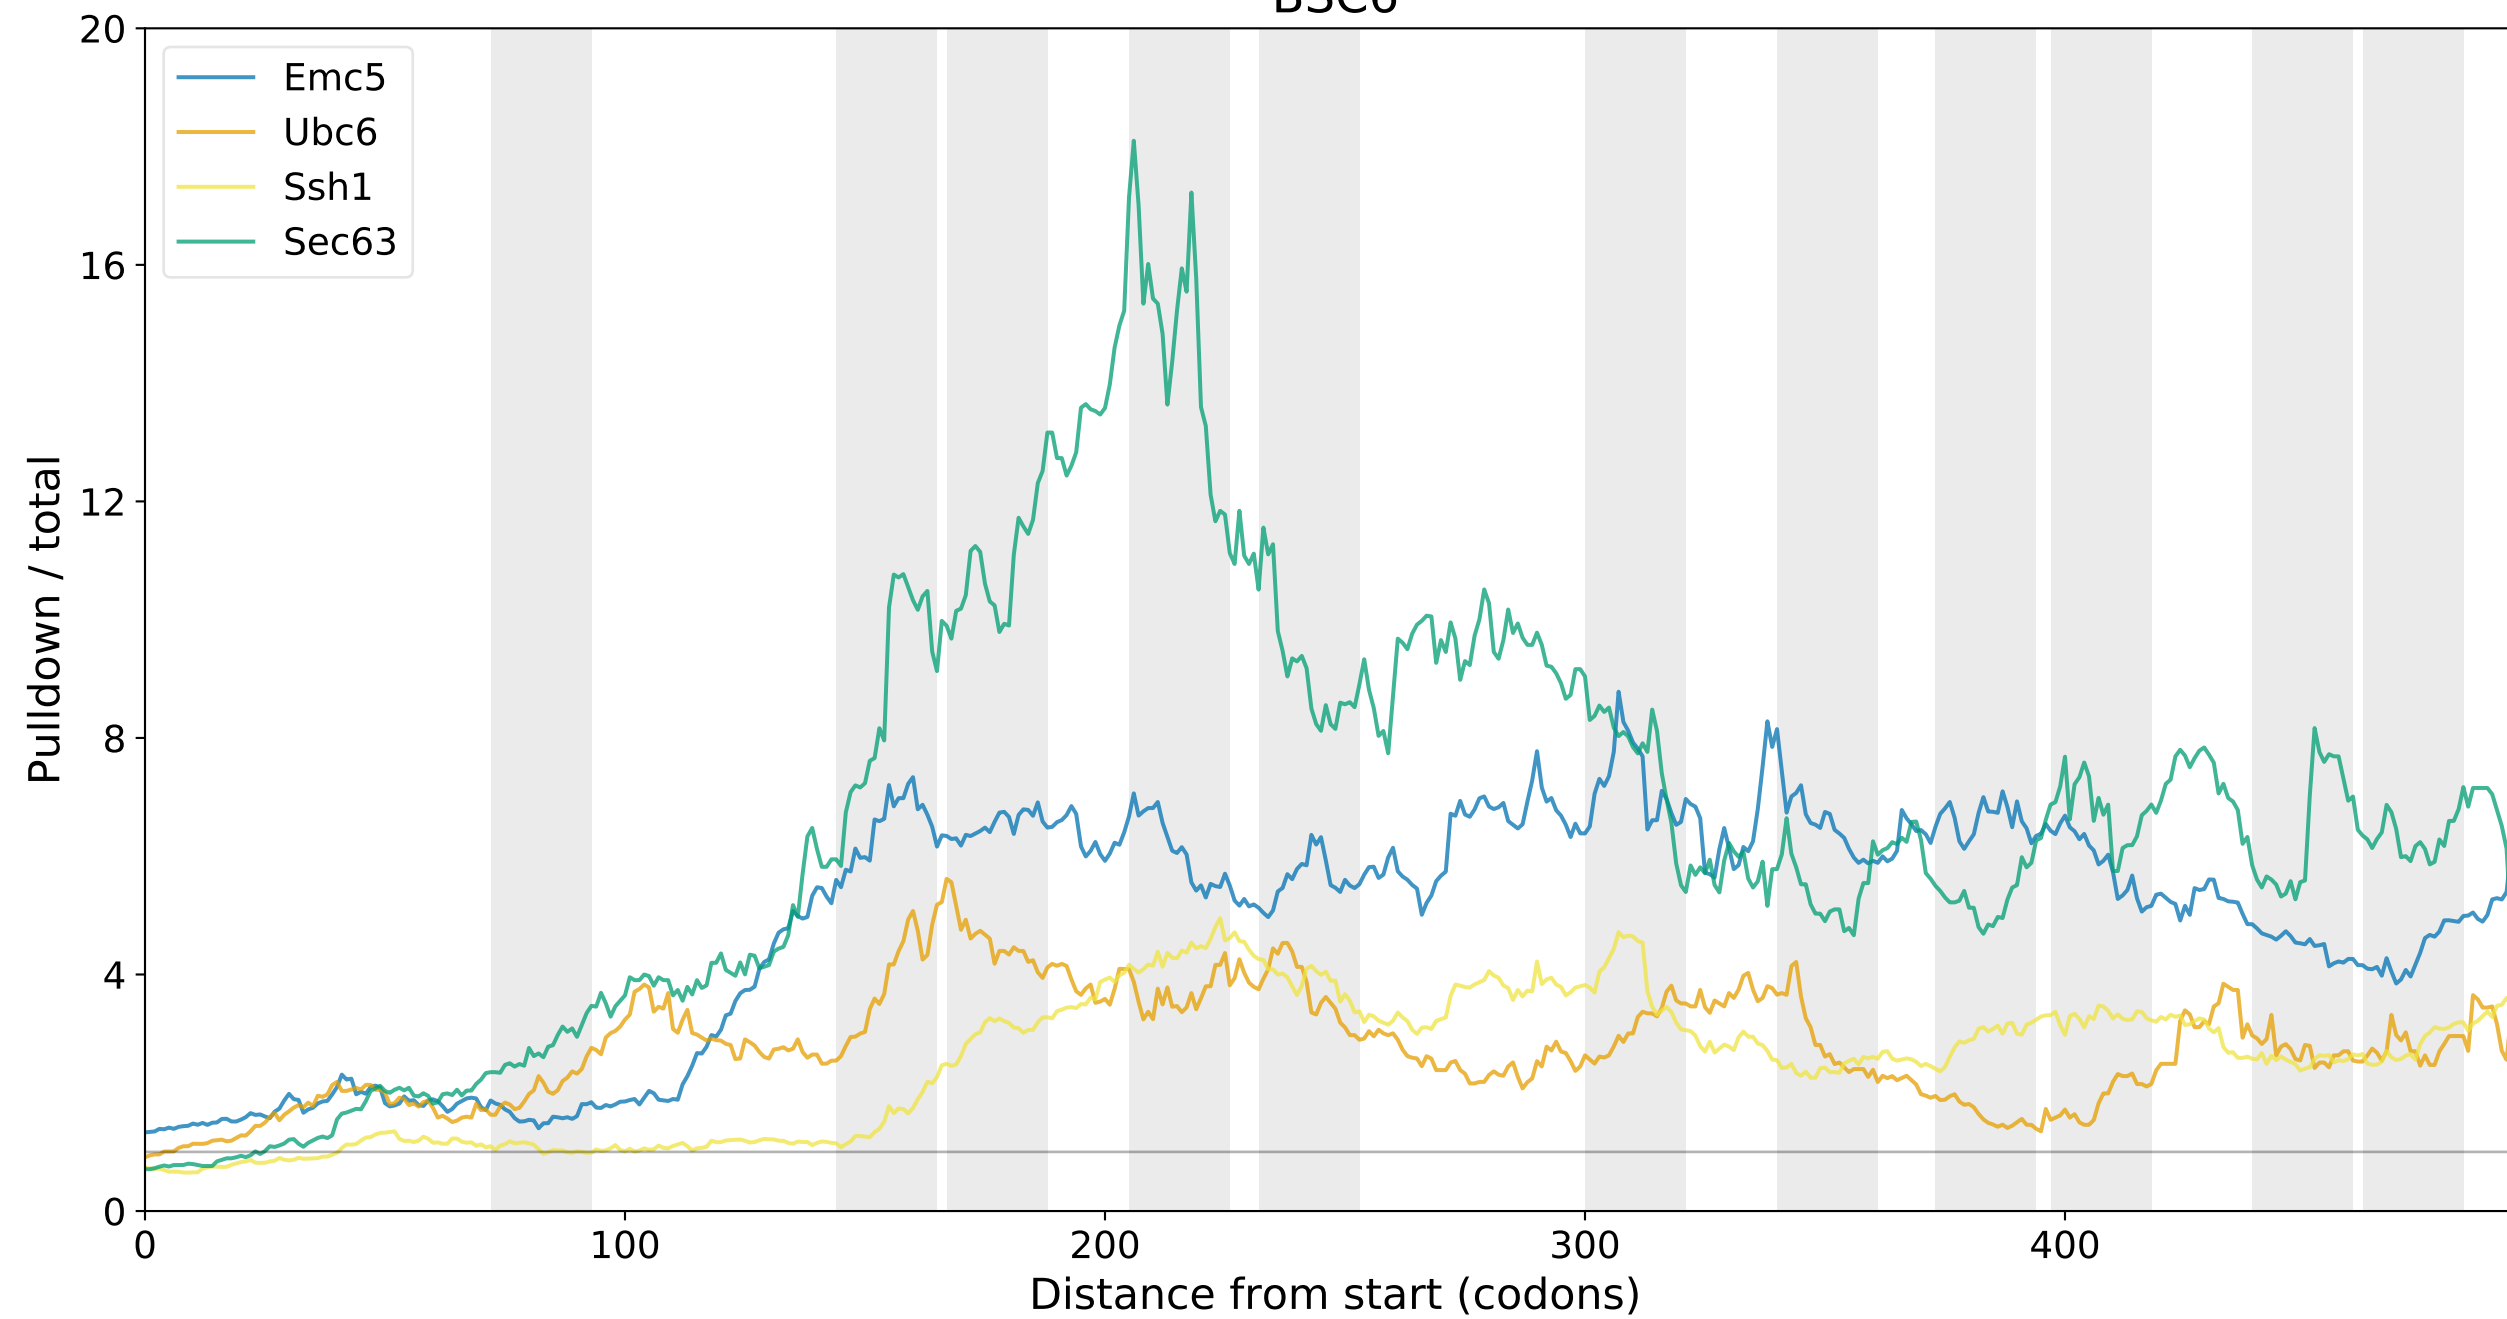

# SPF1

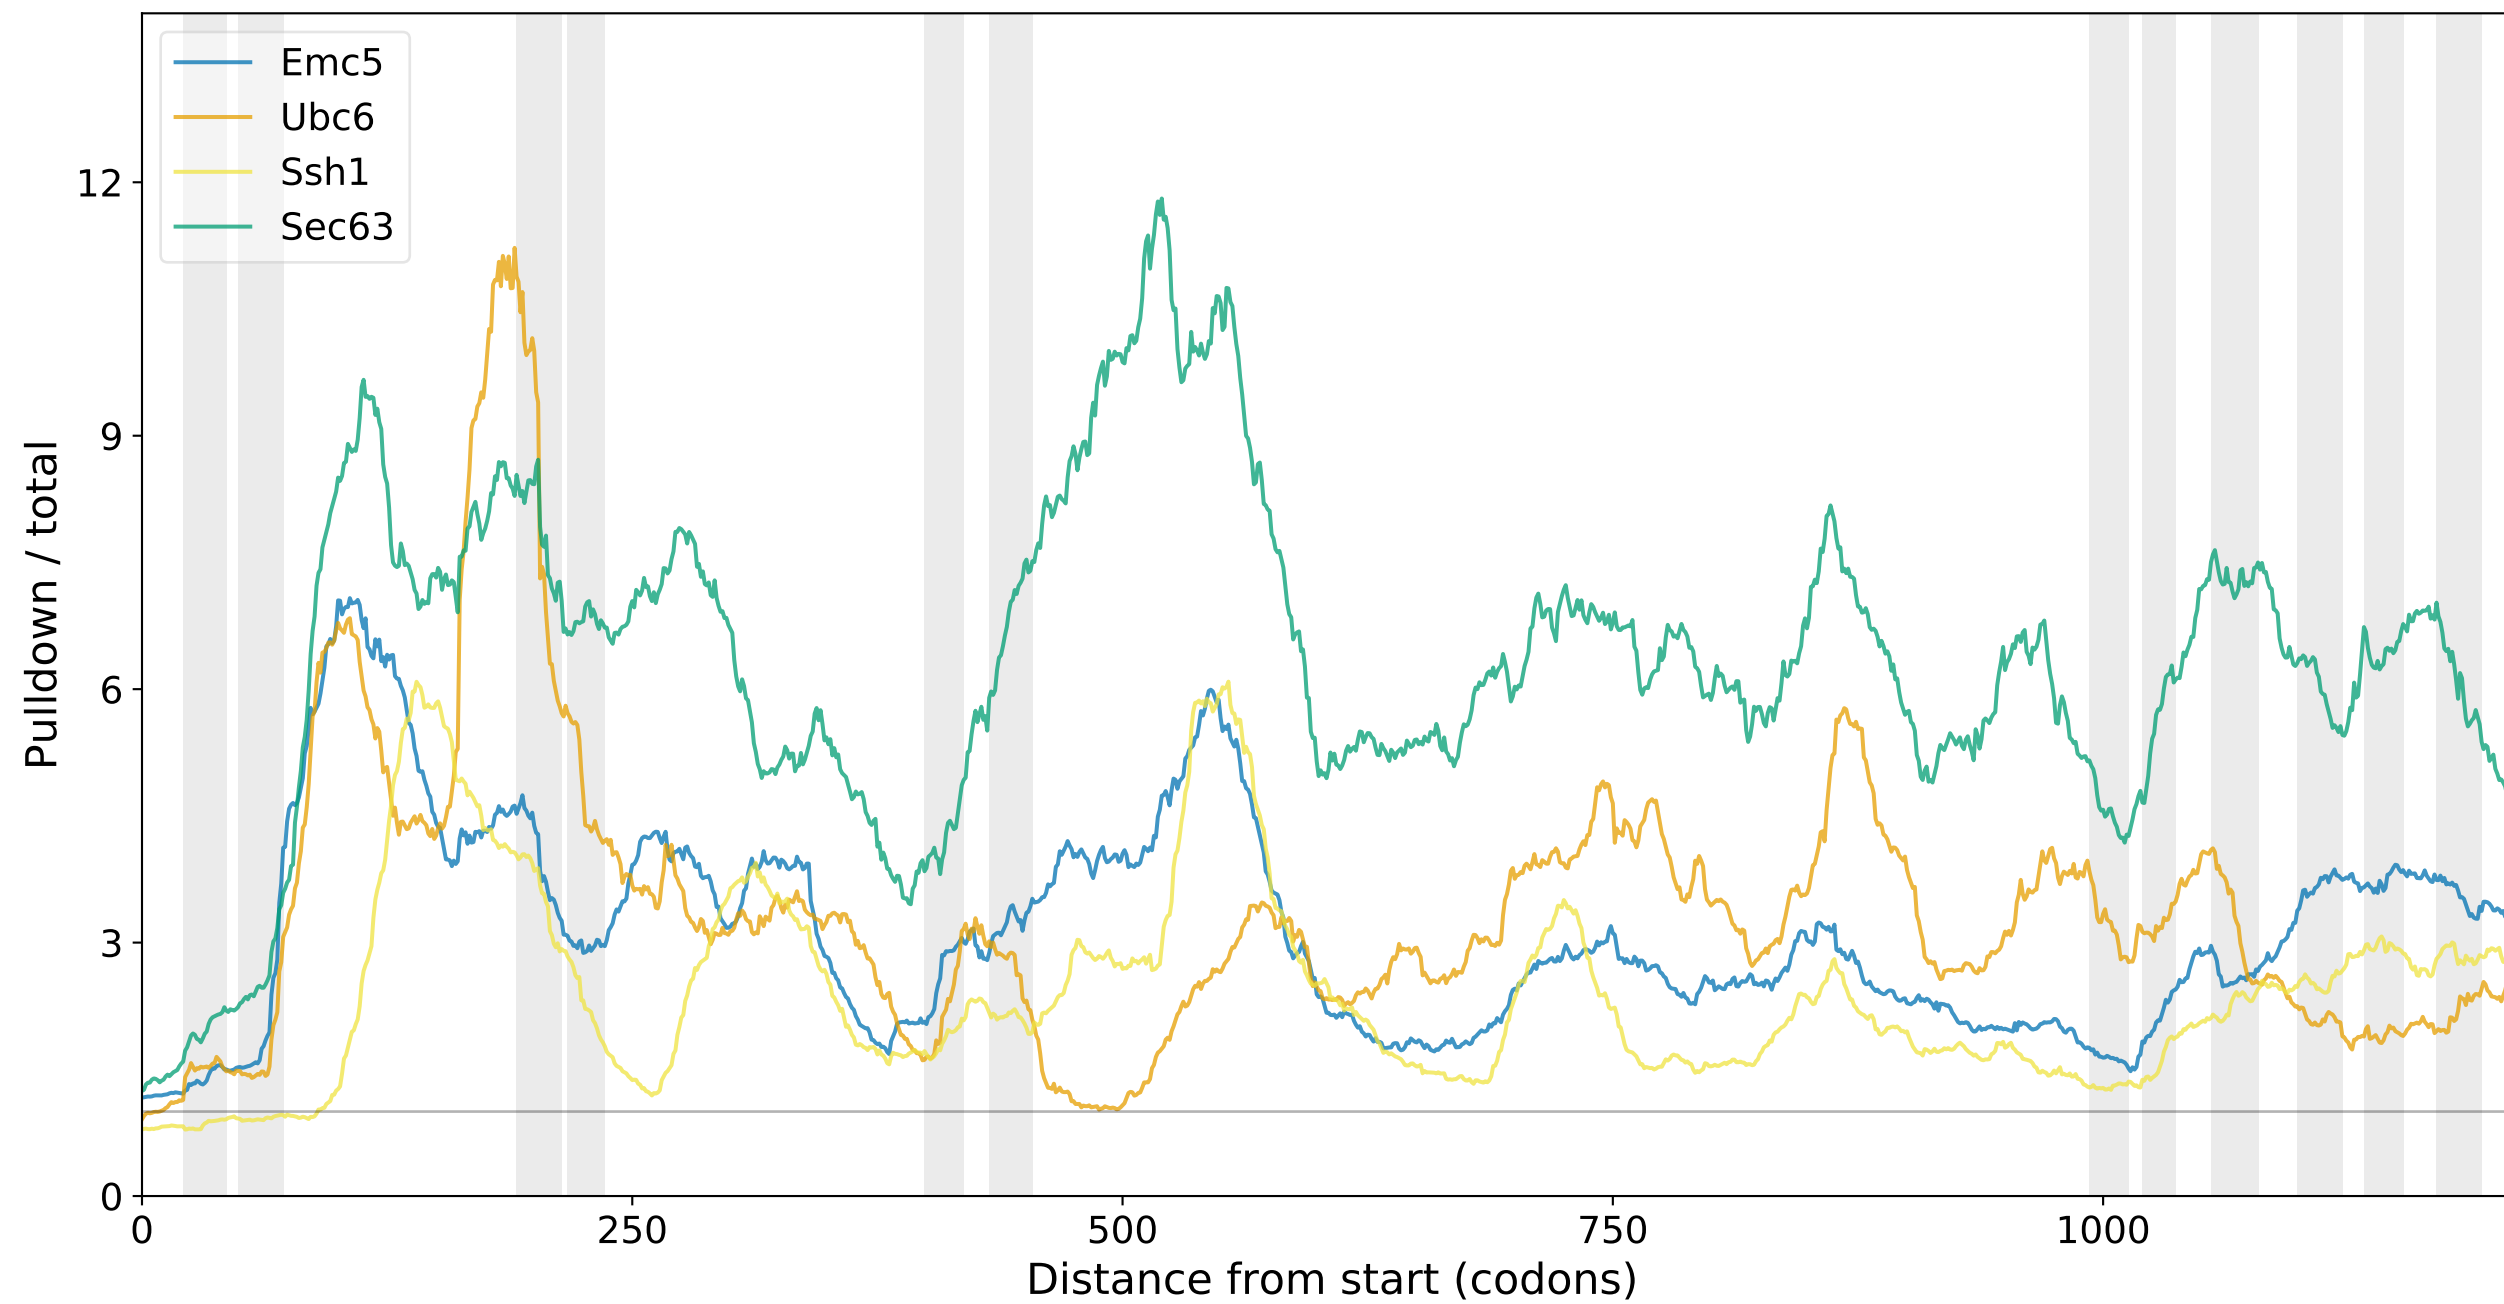

# ICE2

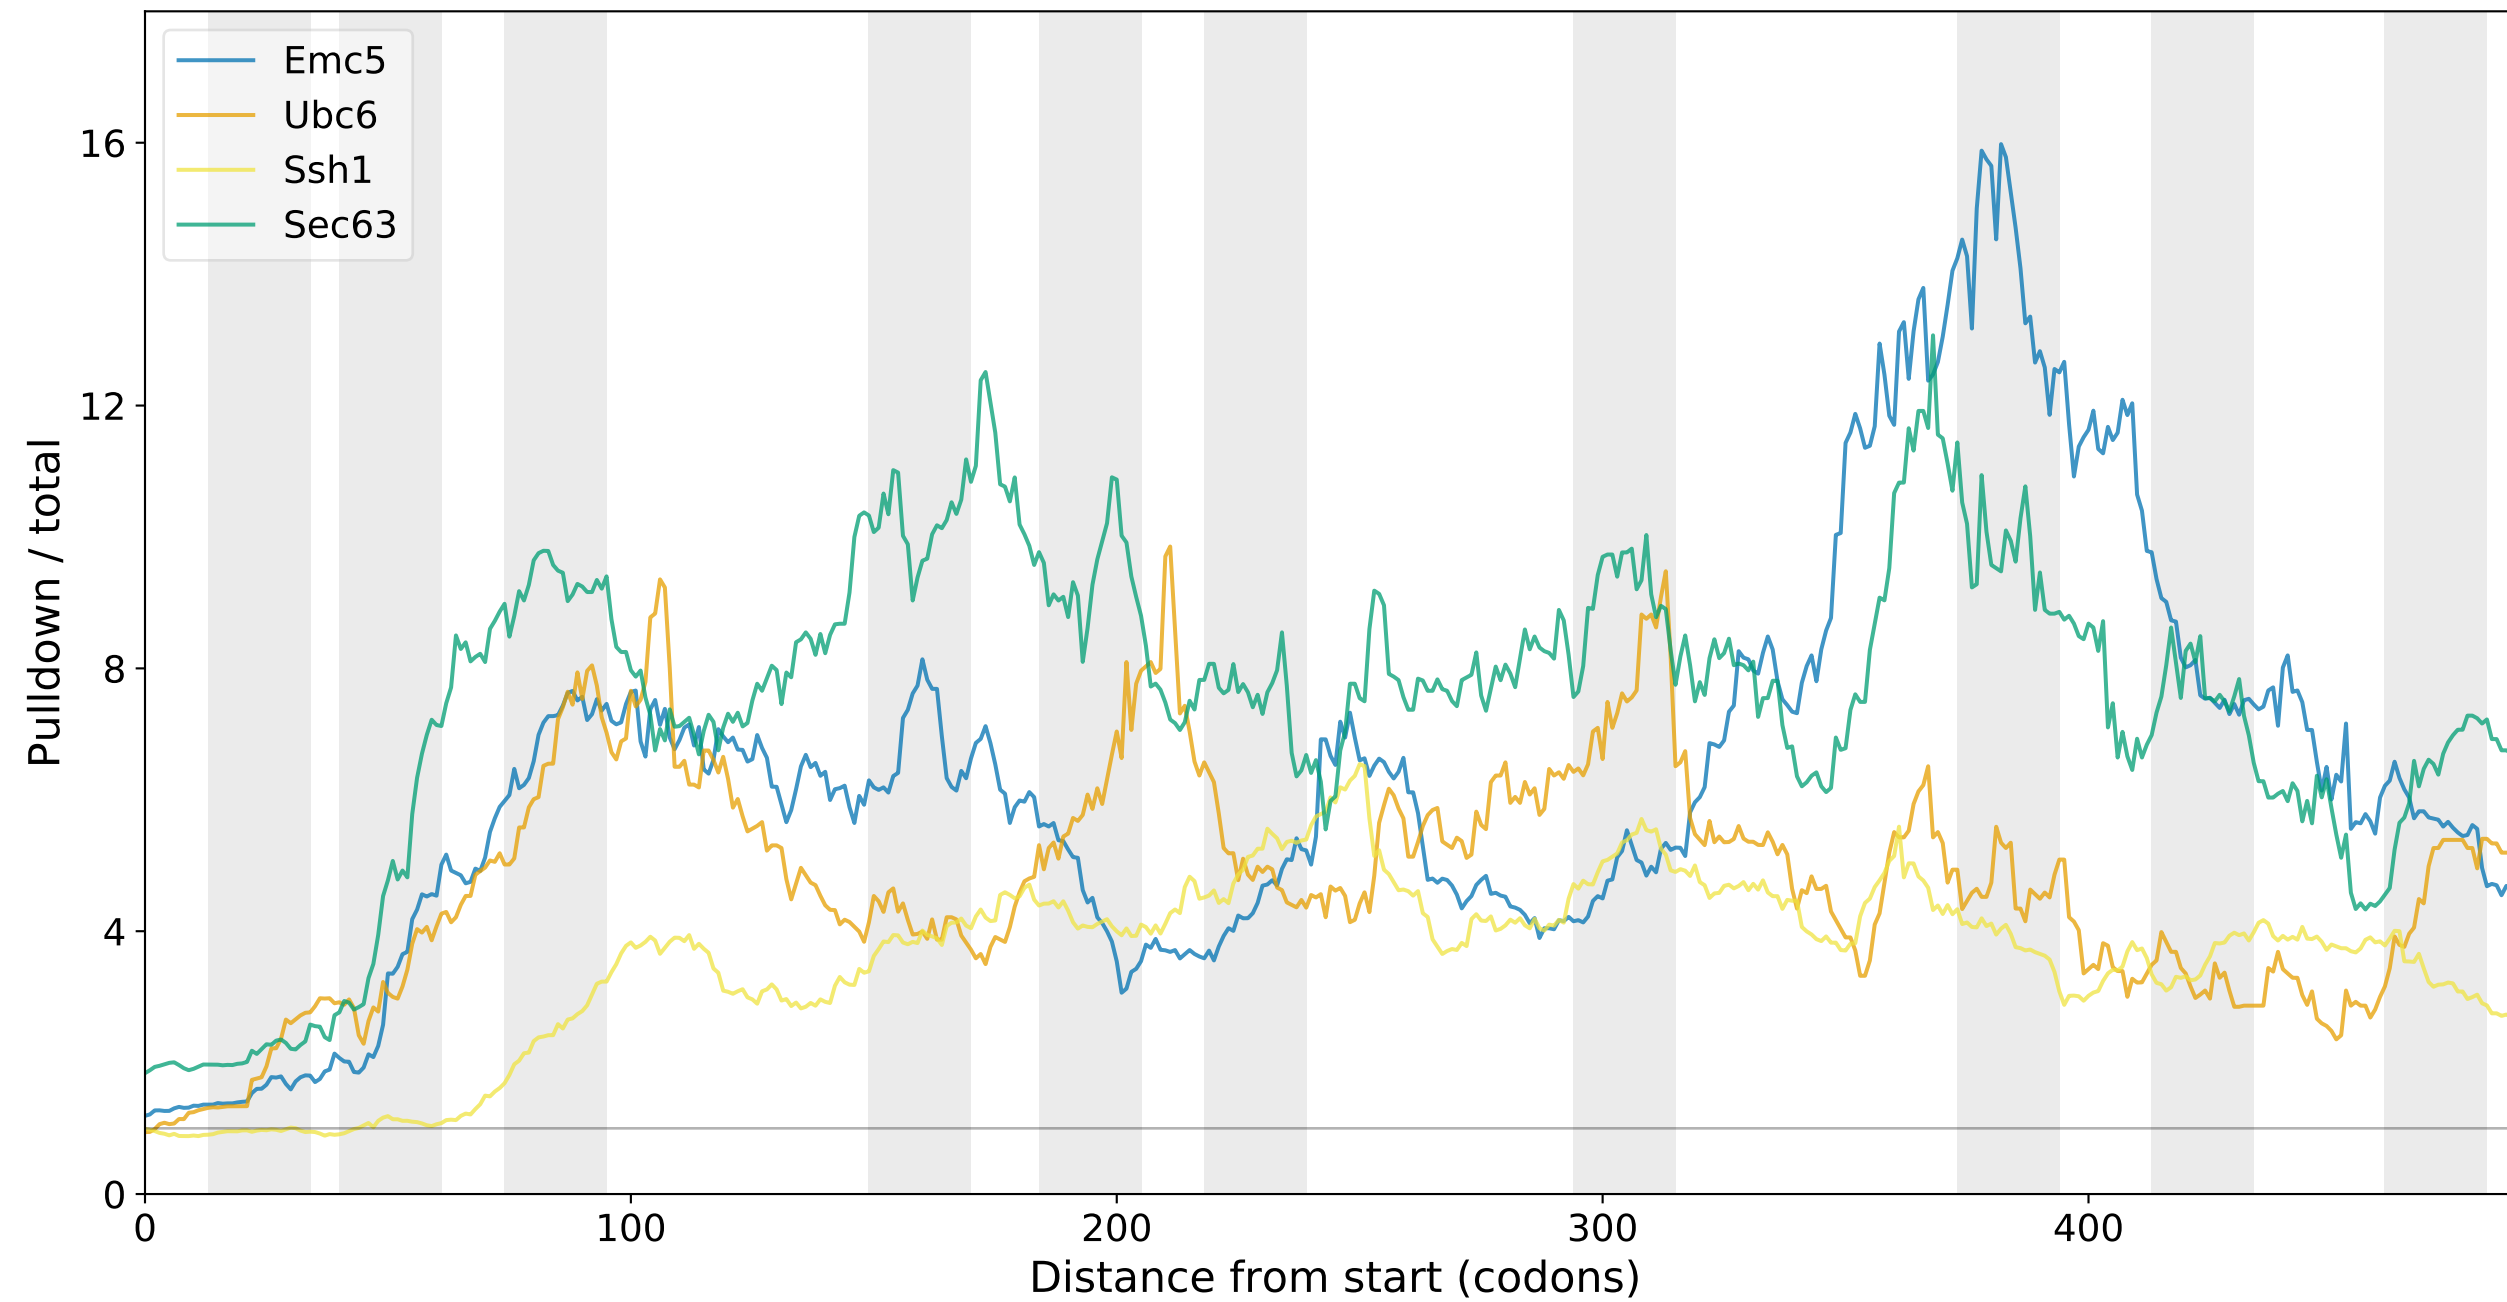



# YMD8

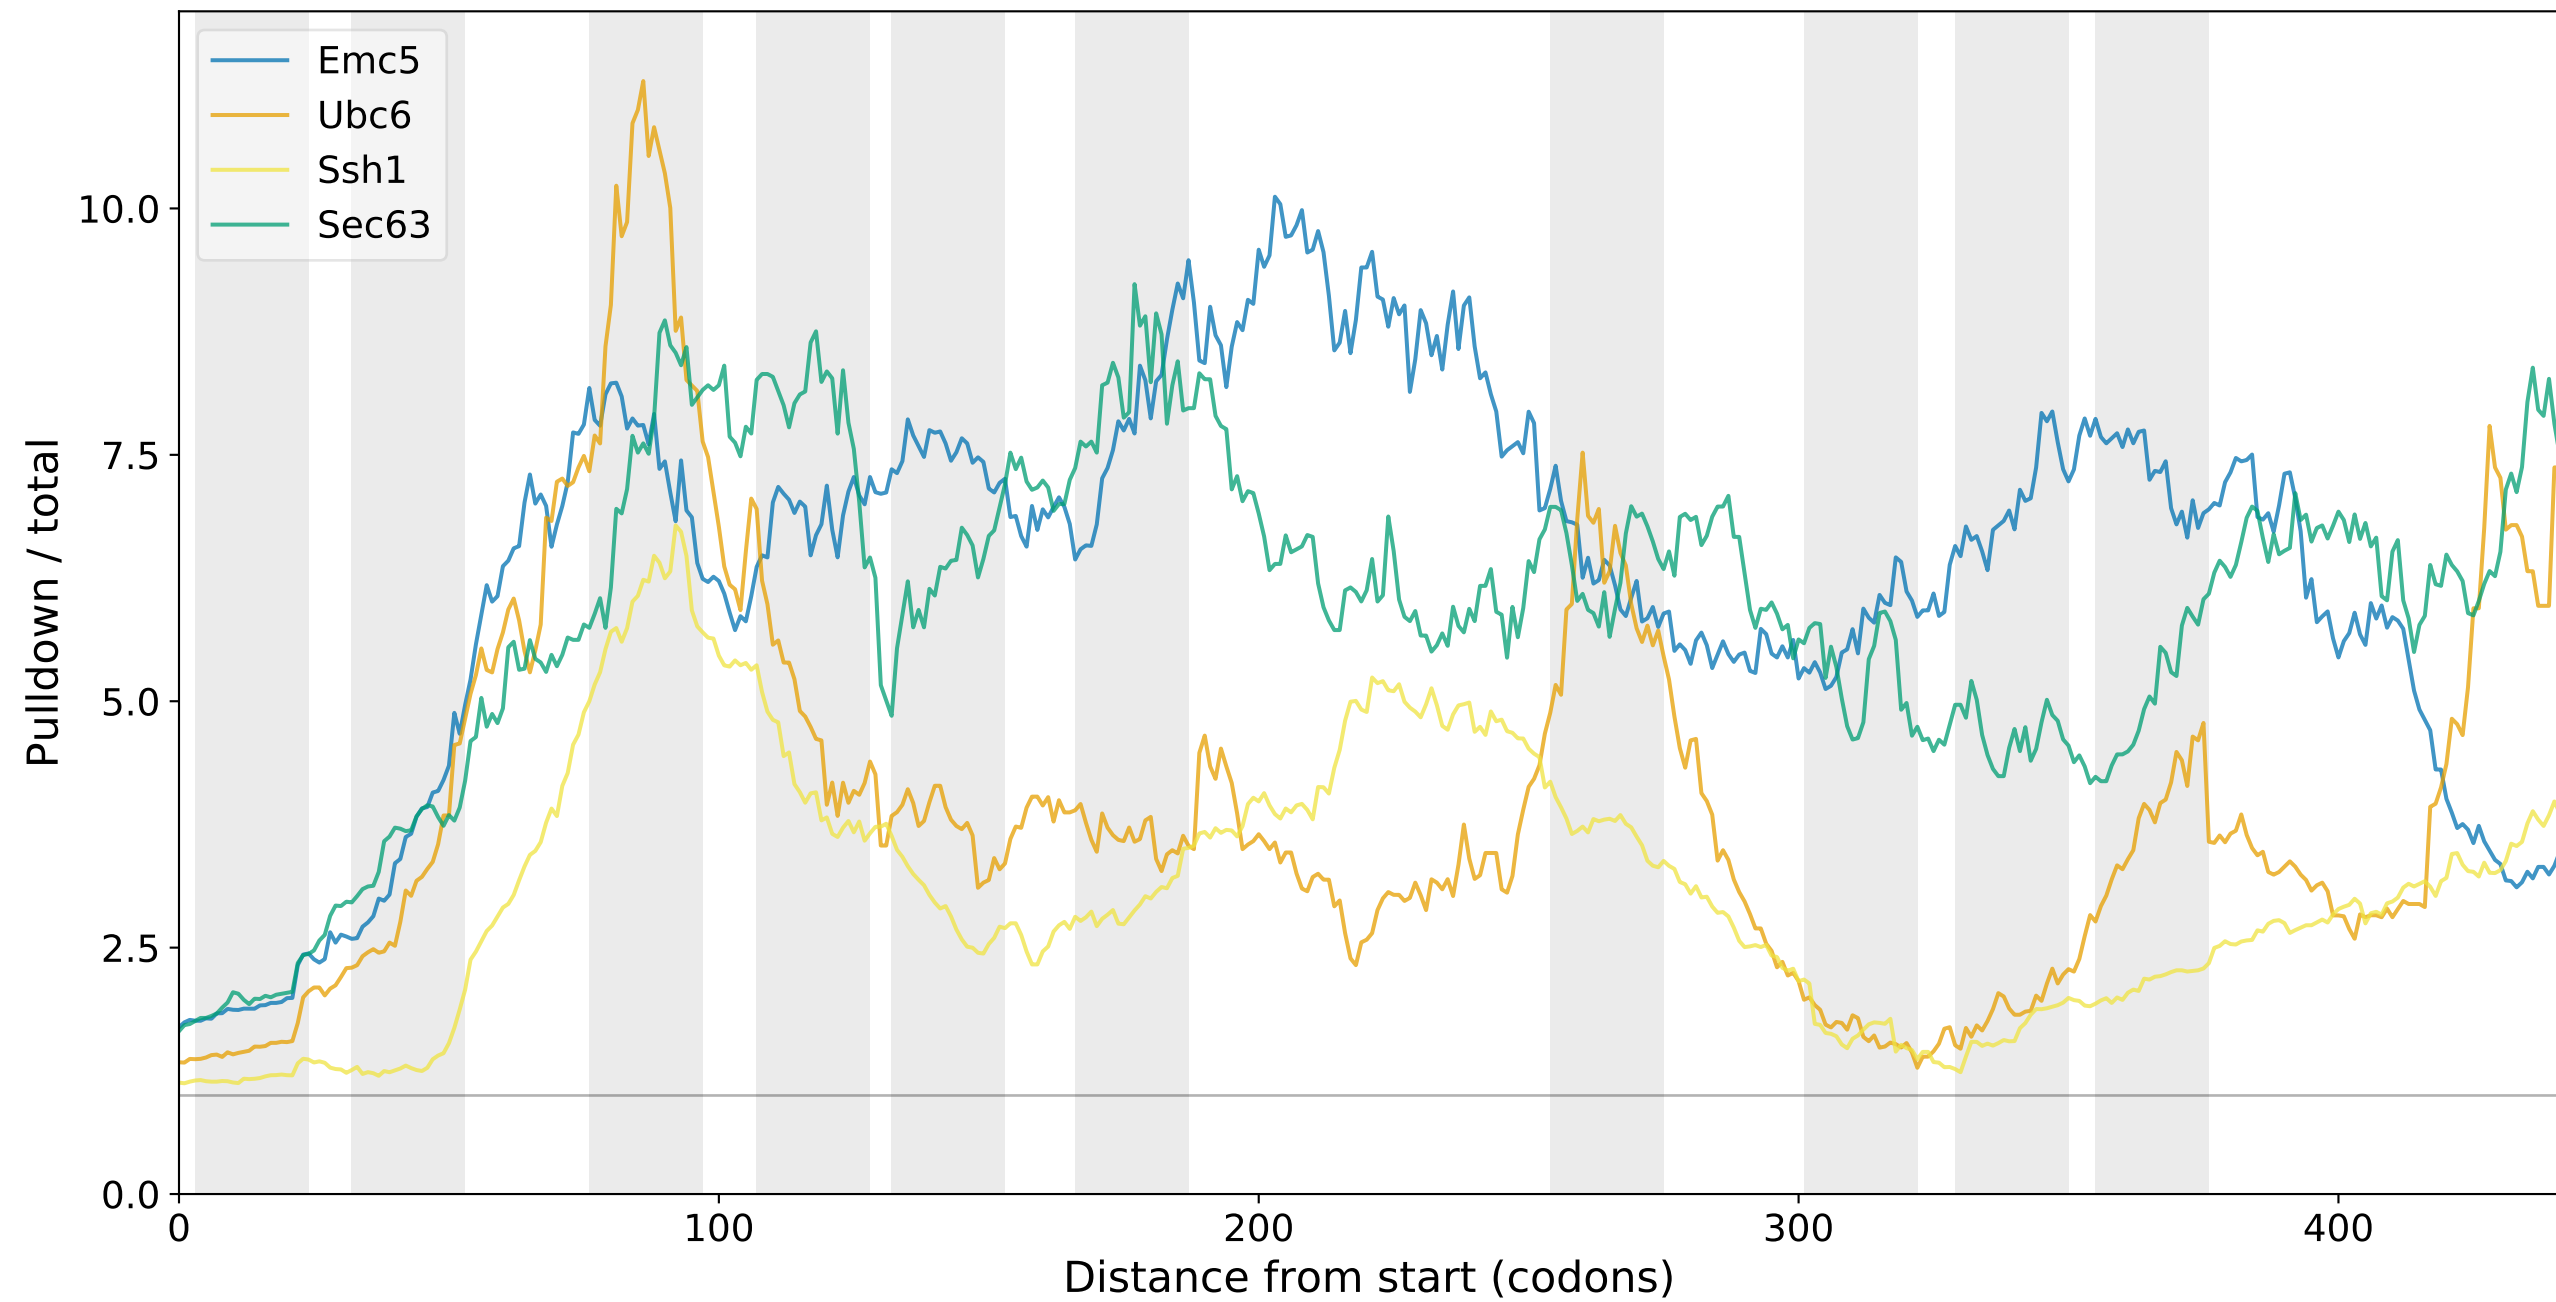

# PNS1

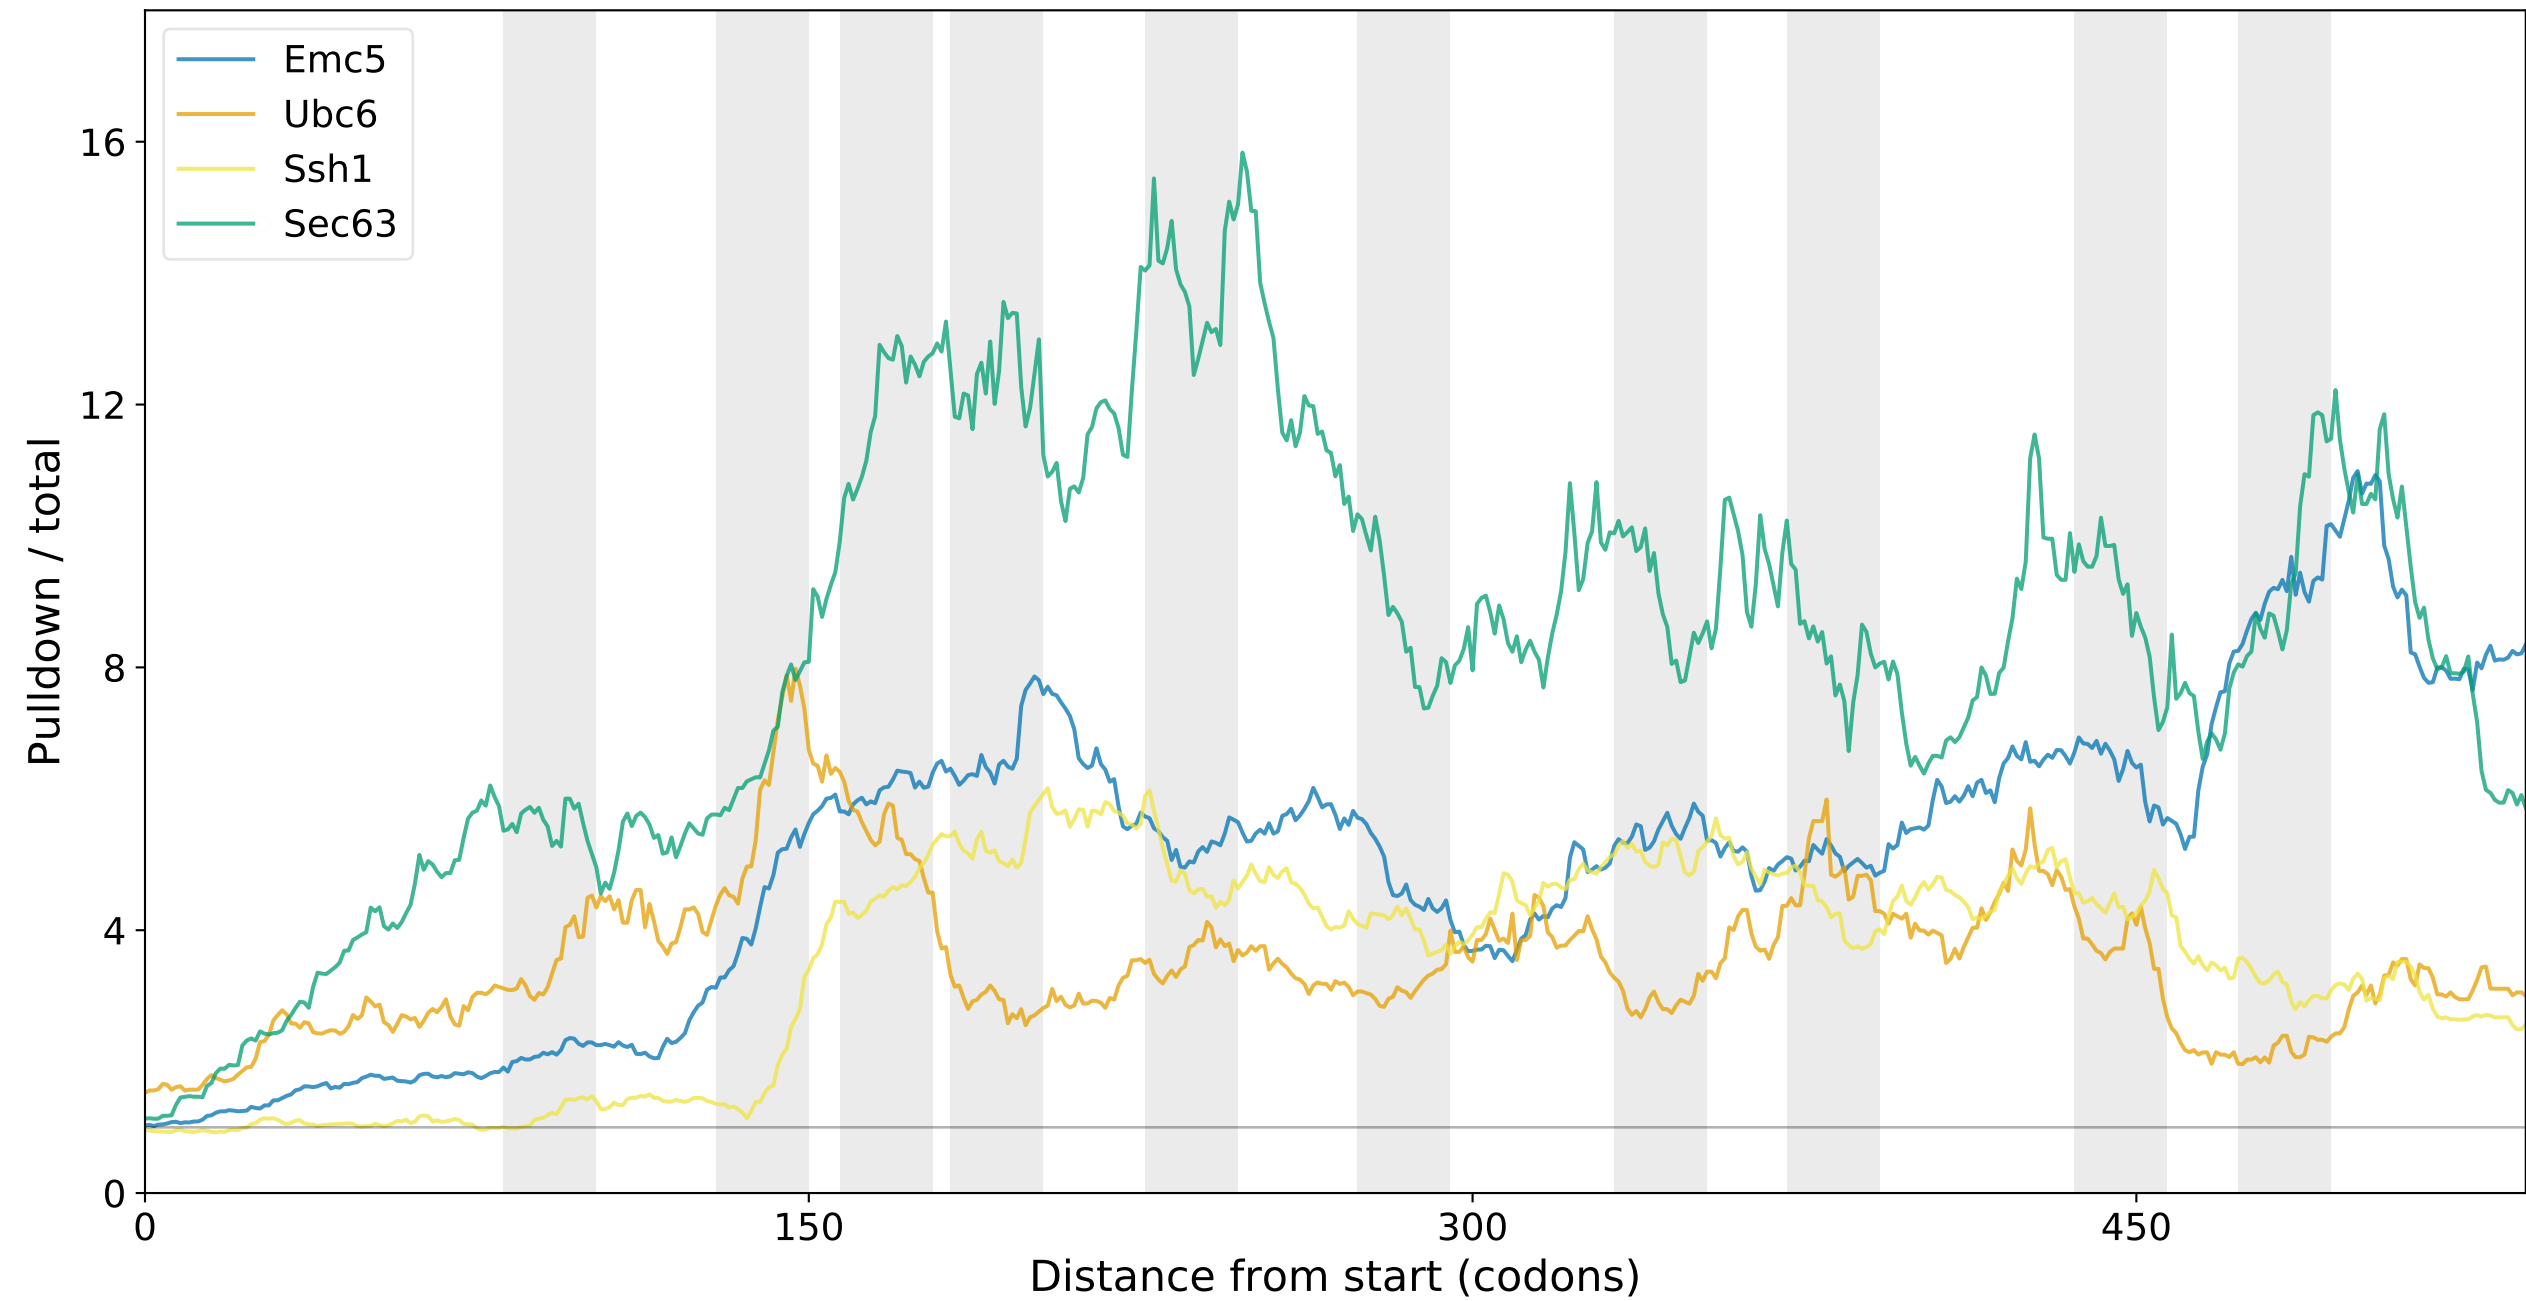

# YCF1

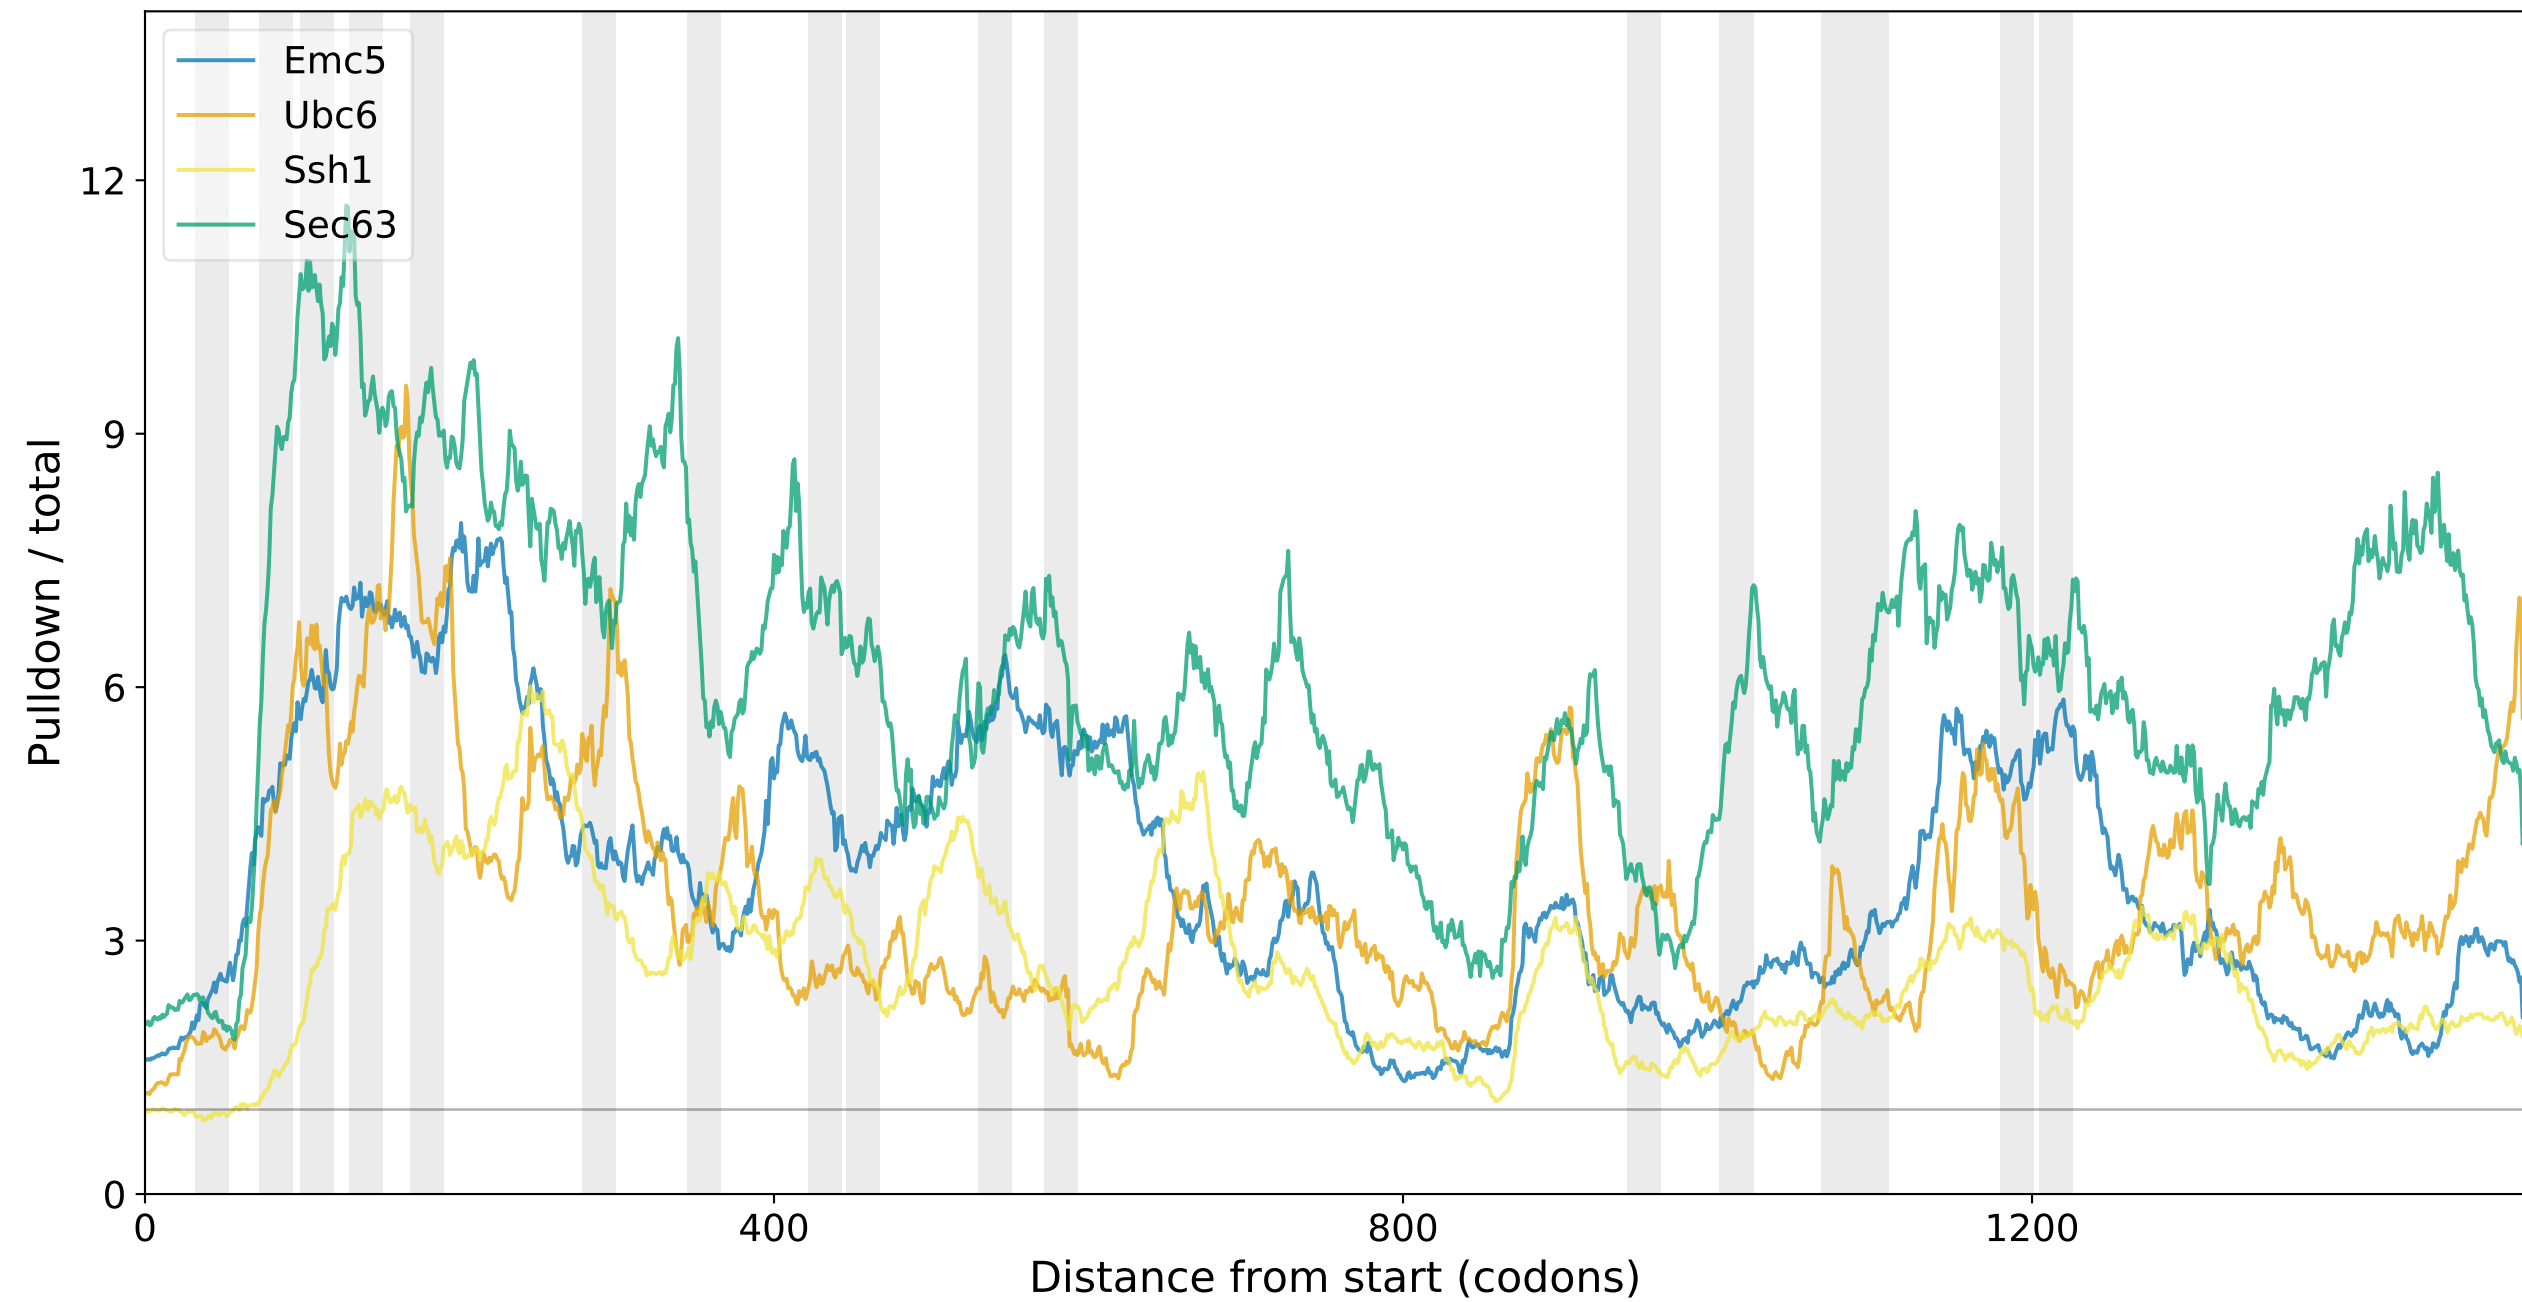

# VPS73

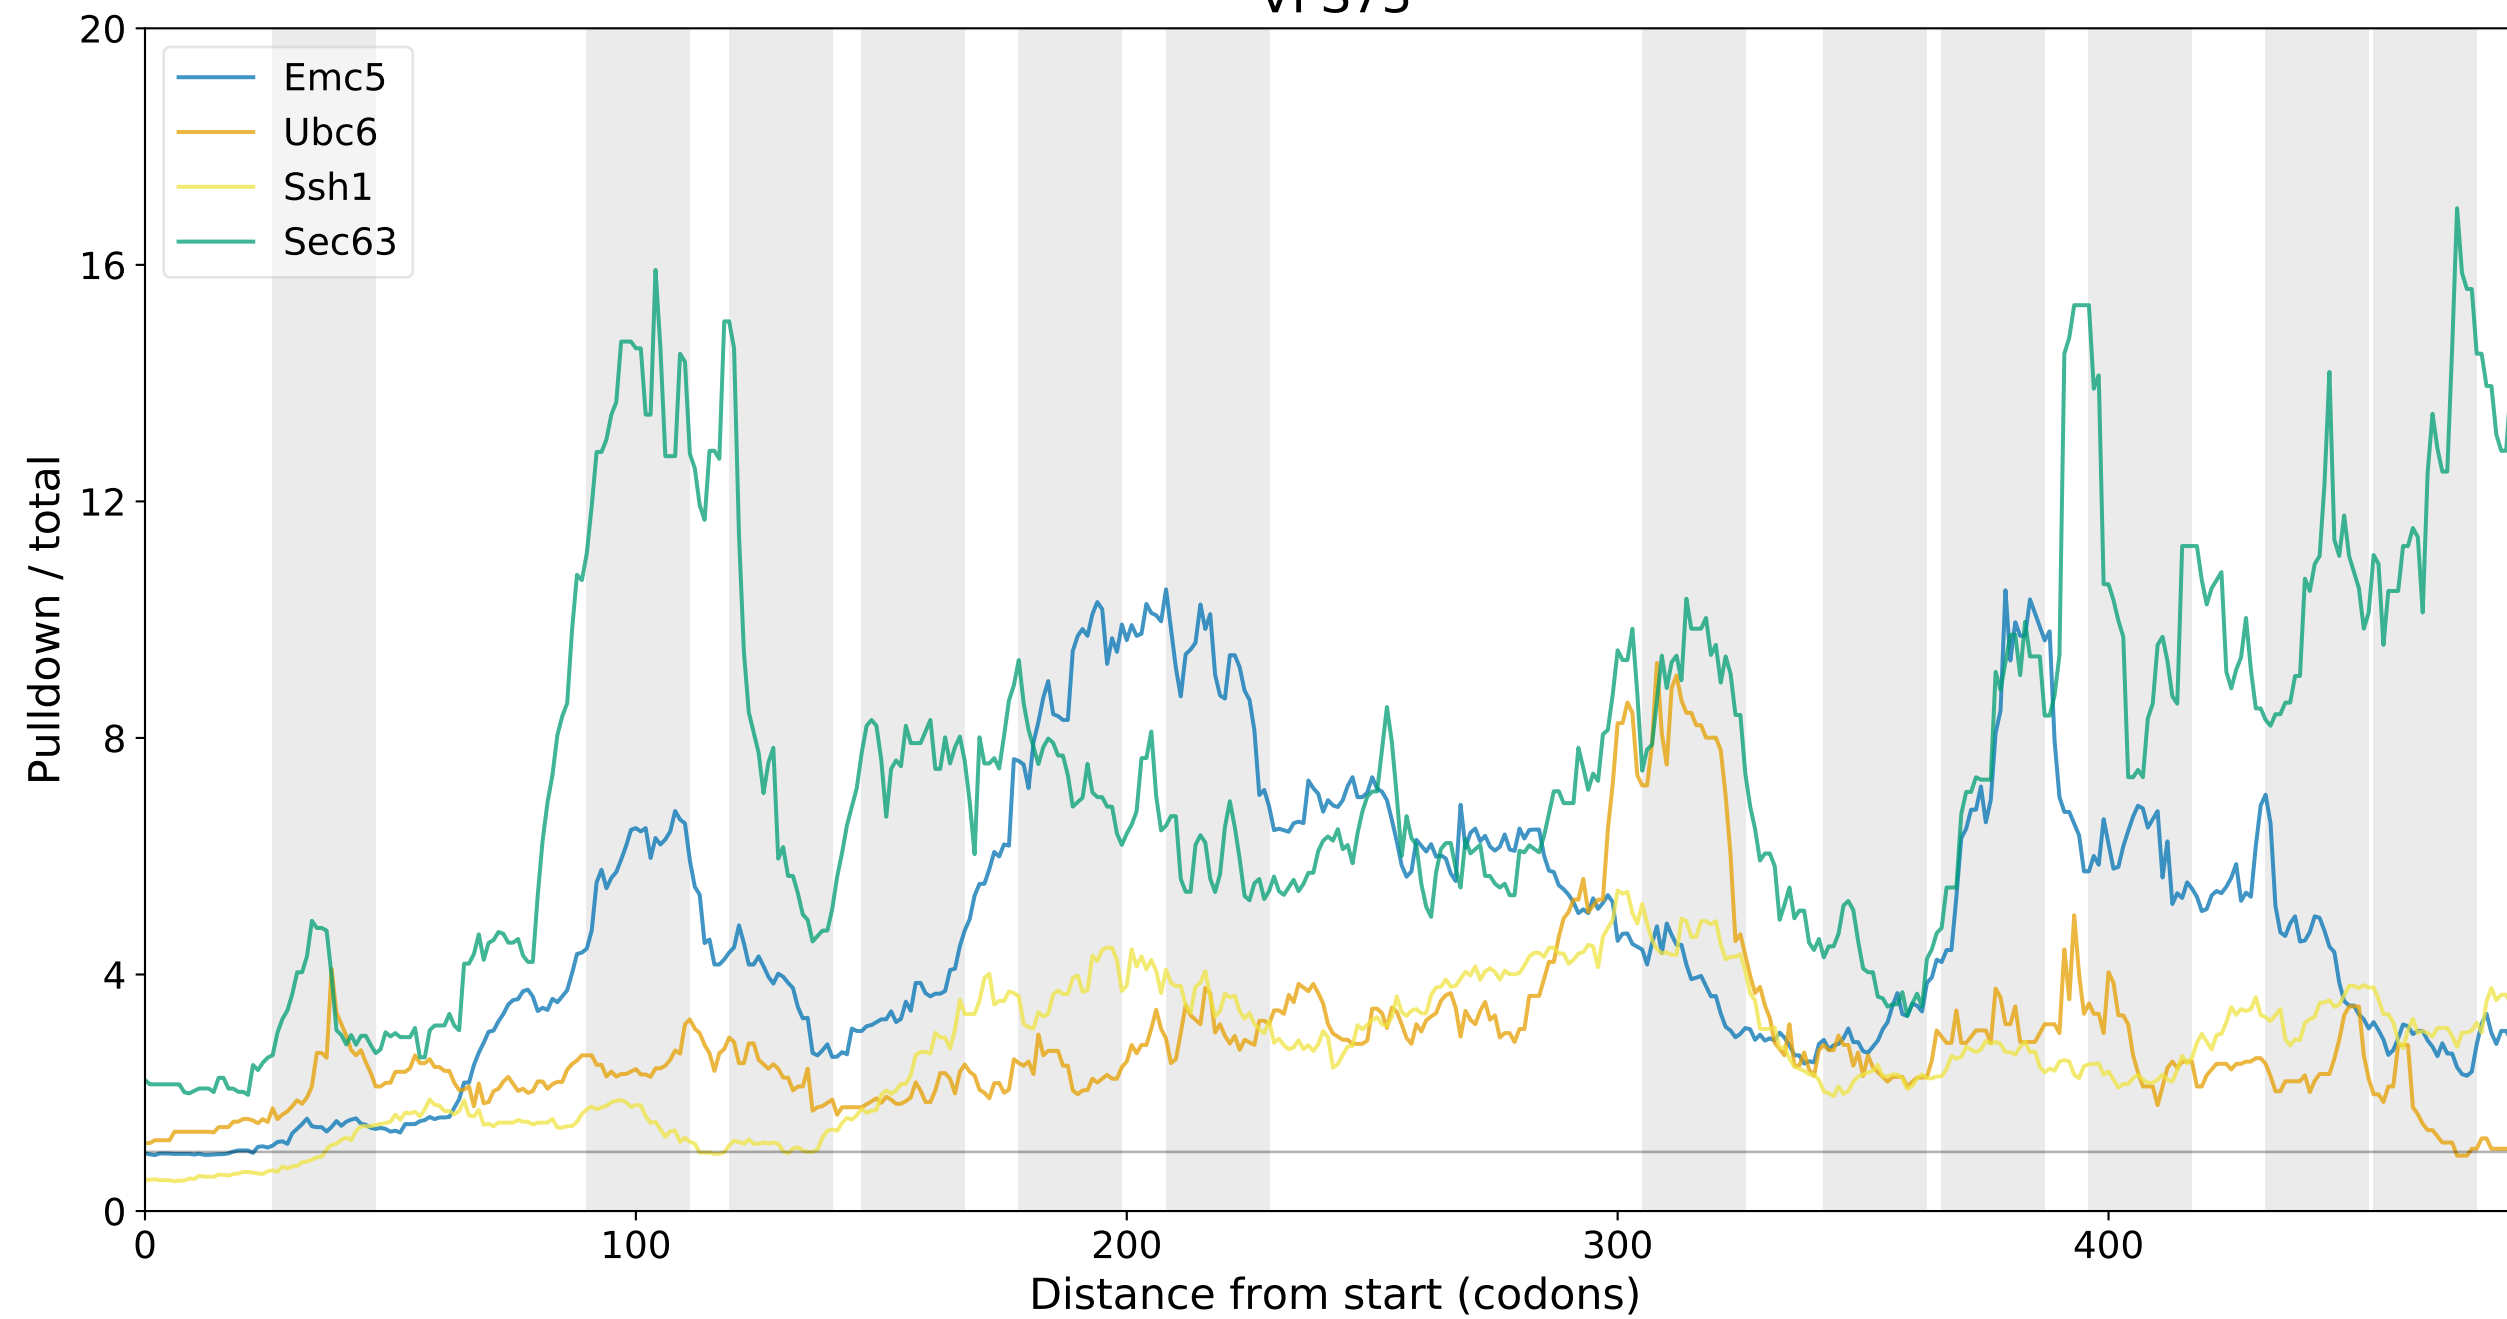

# CPT1

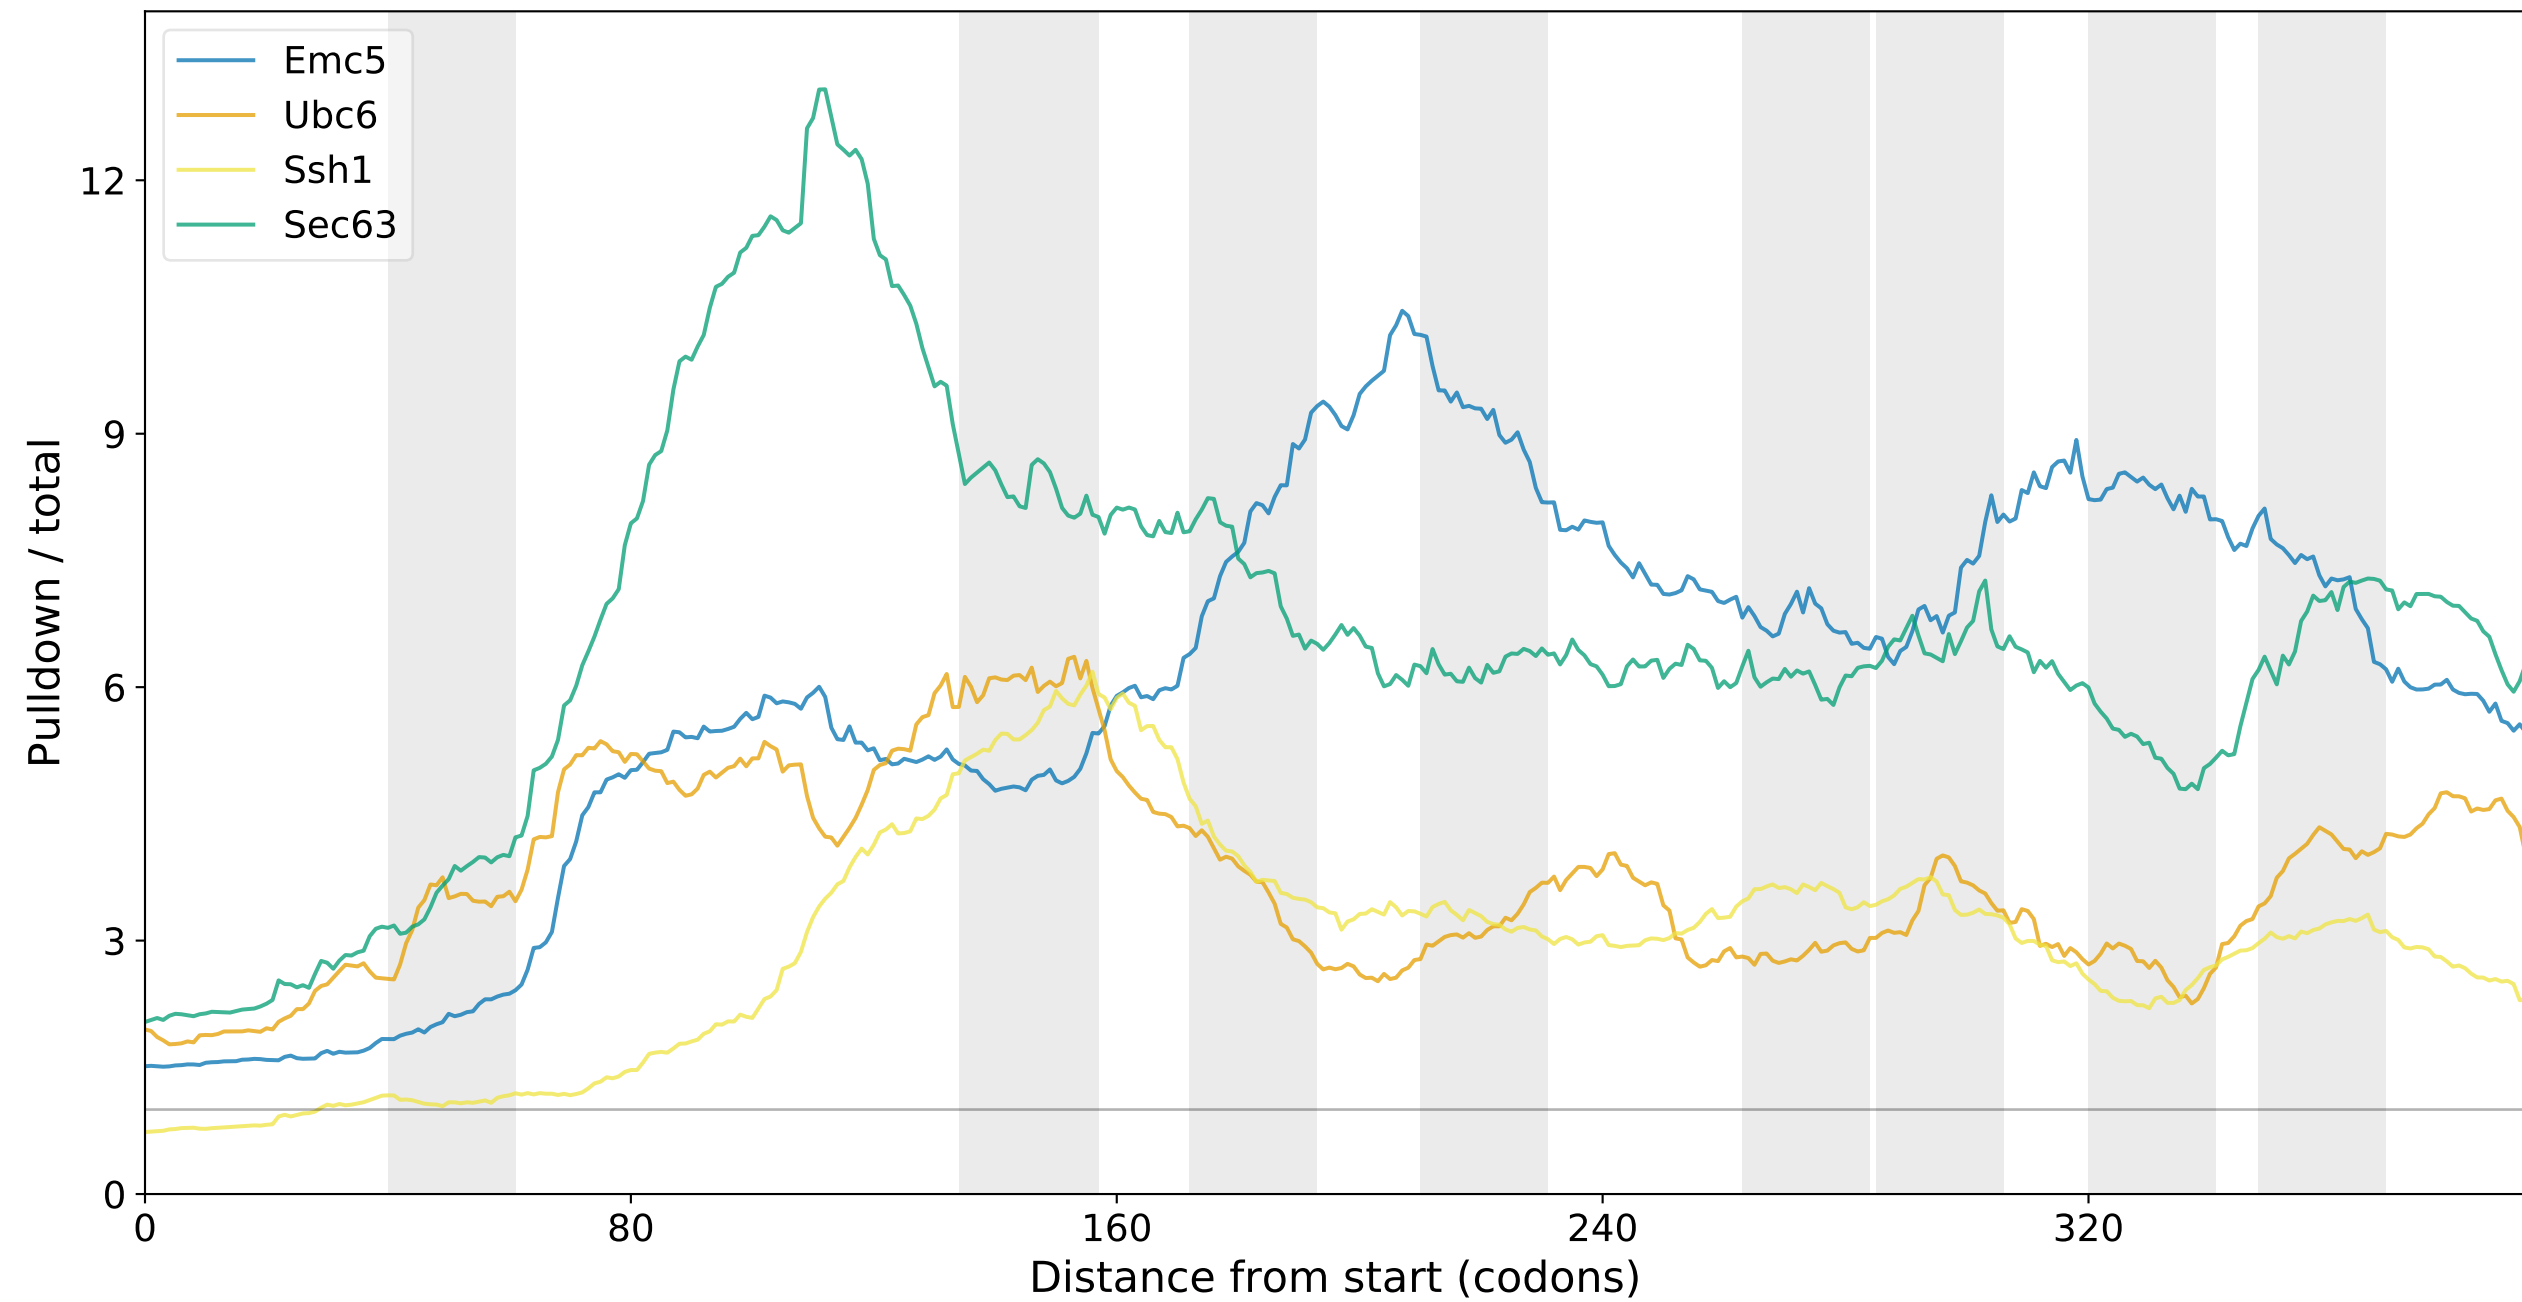

# PHO90

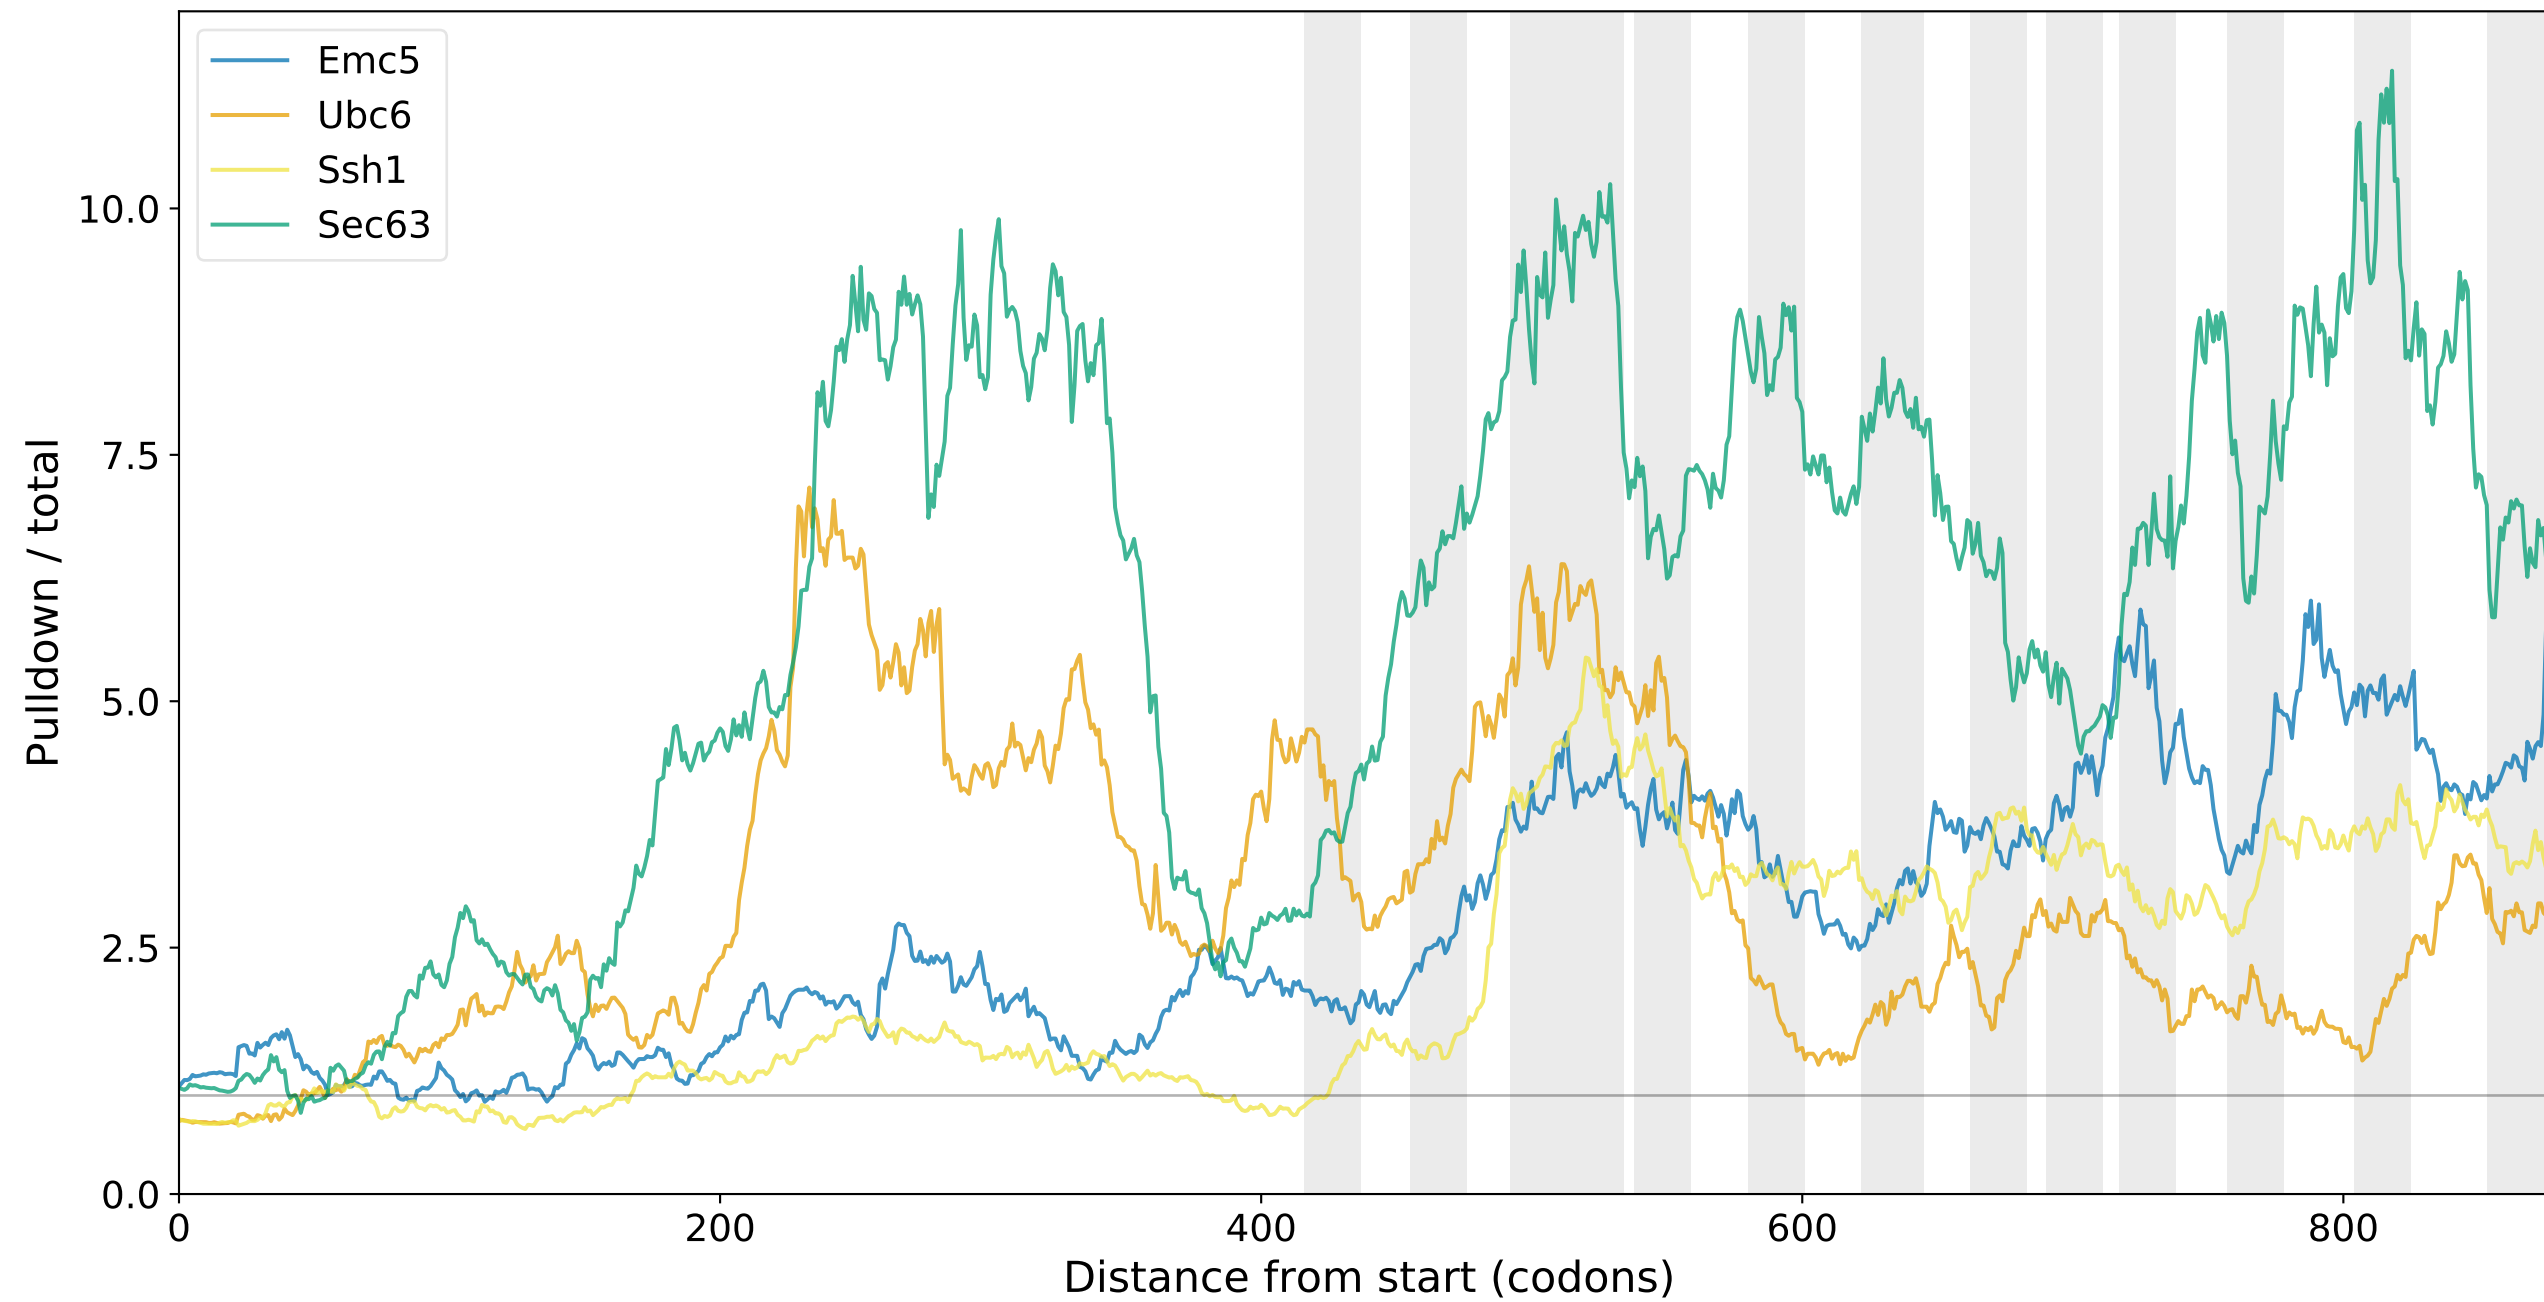

# YBT1

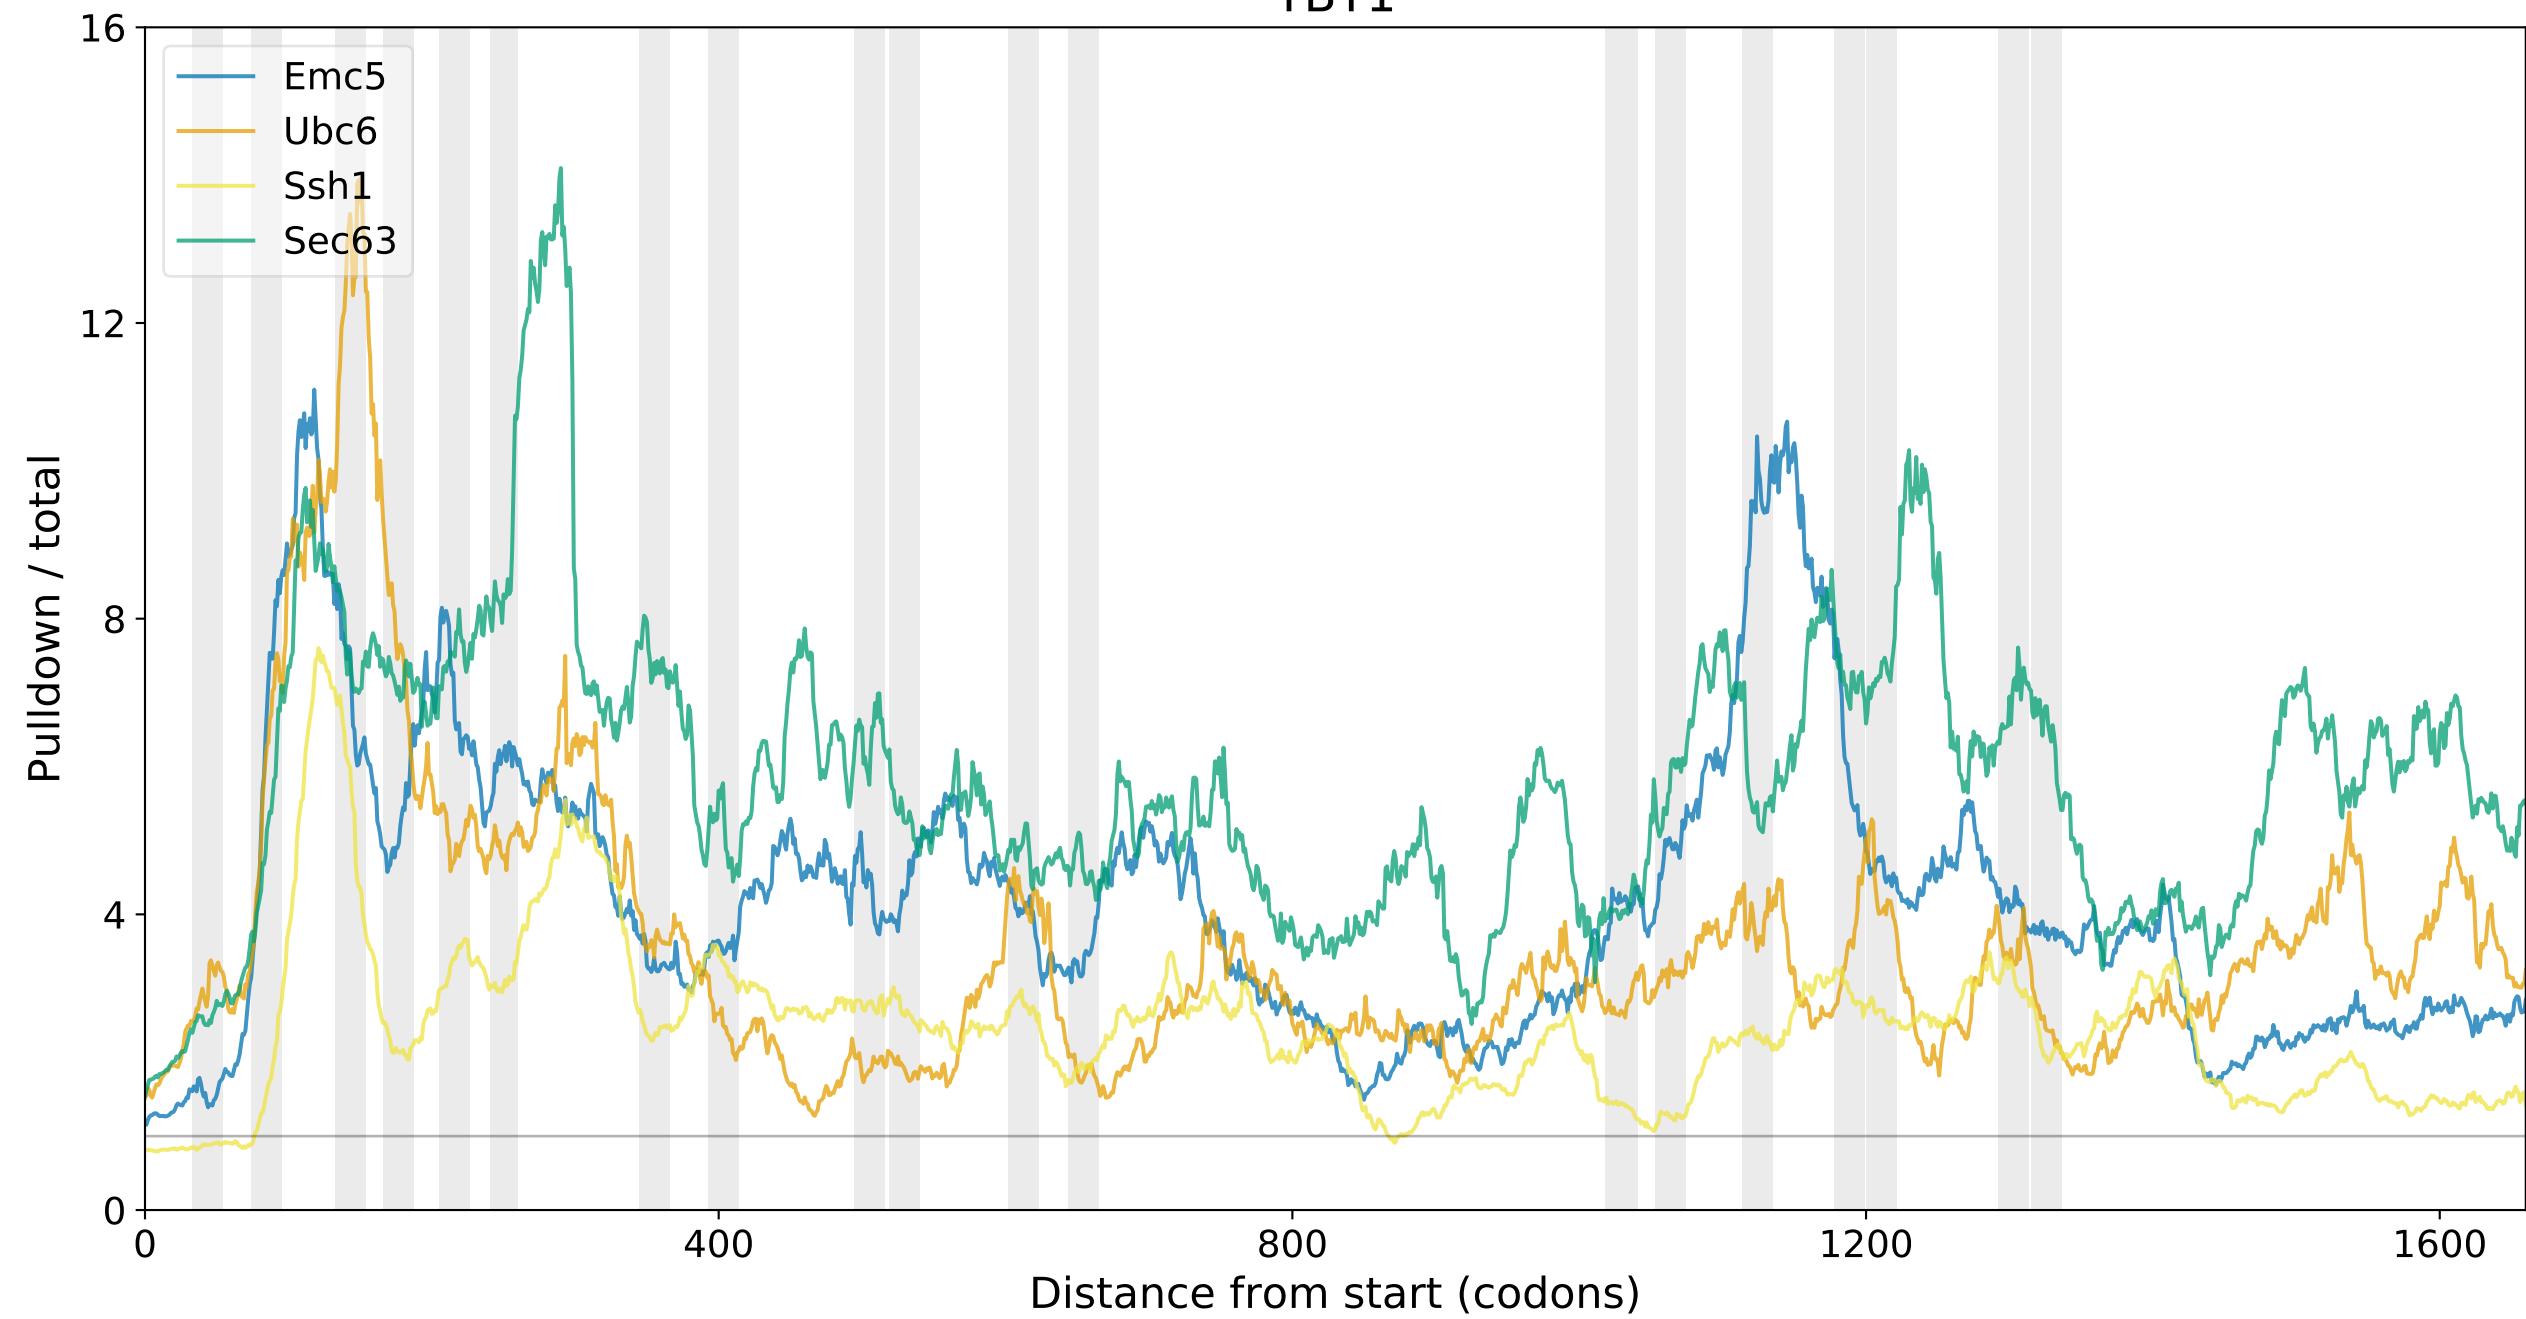

# TGL3

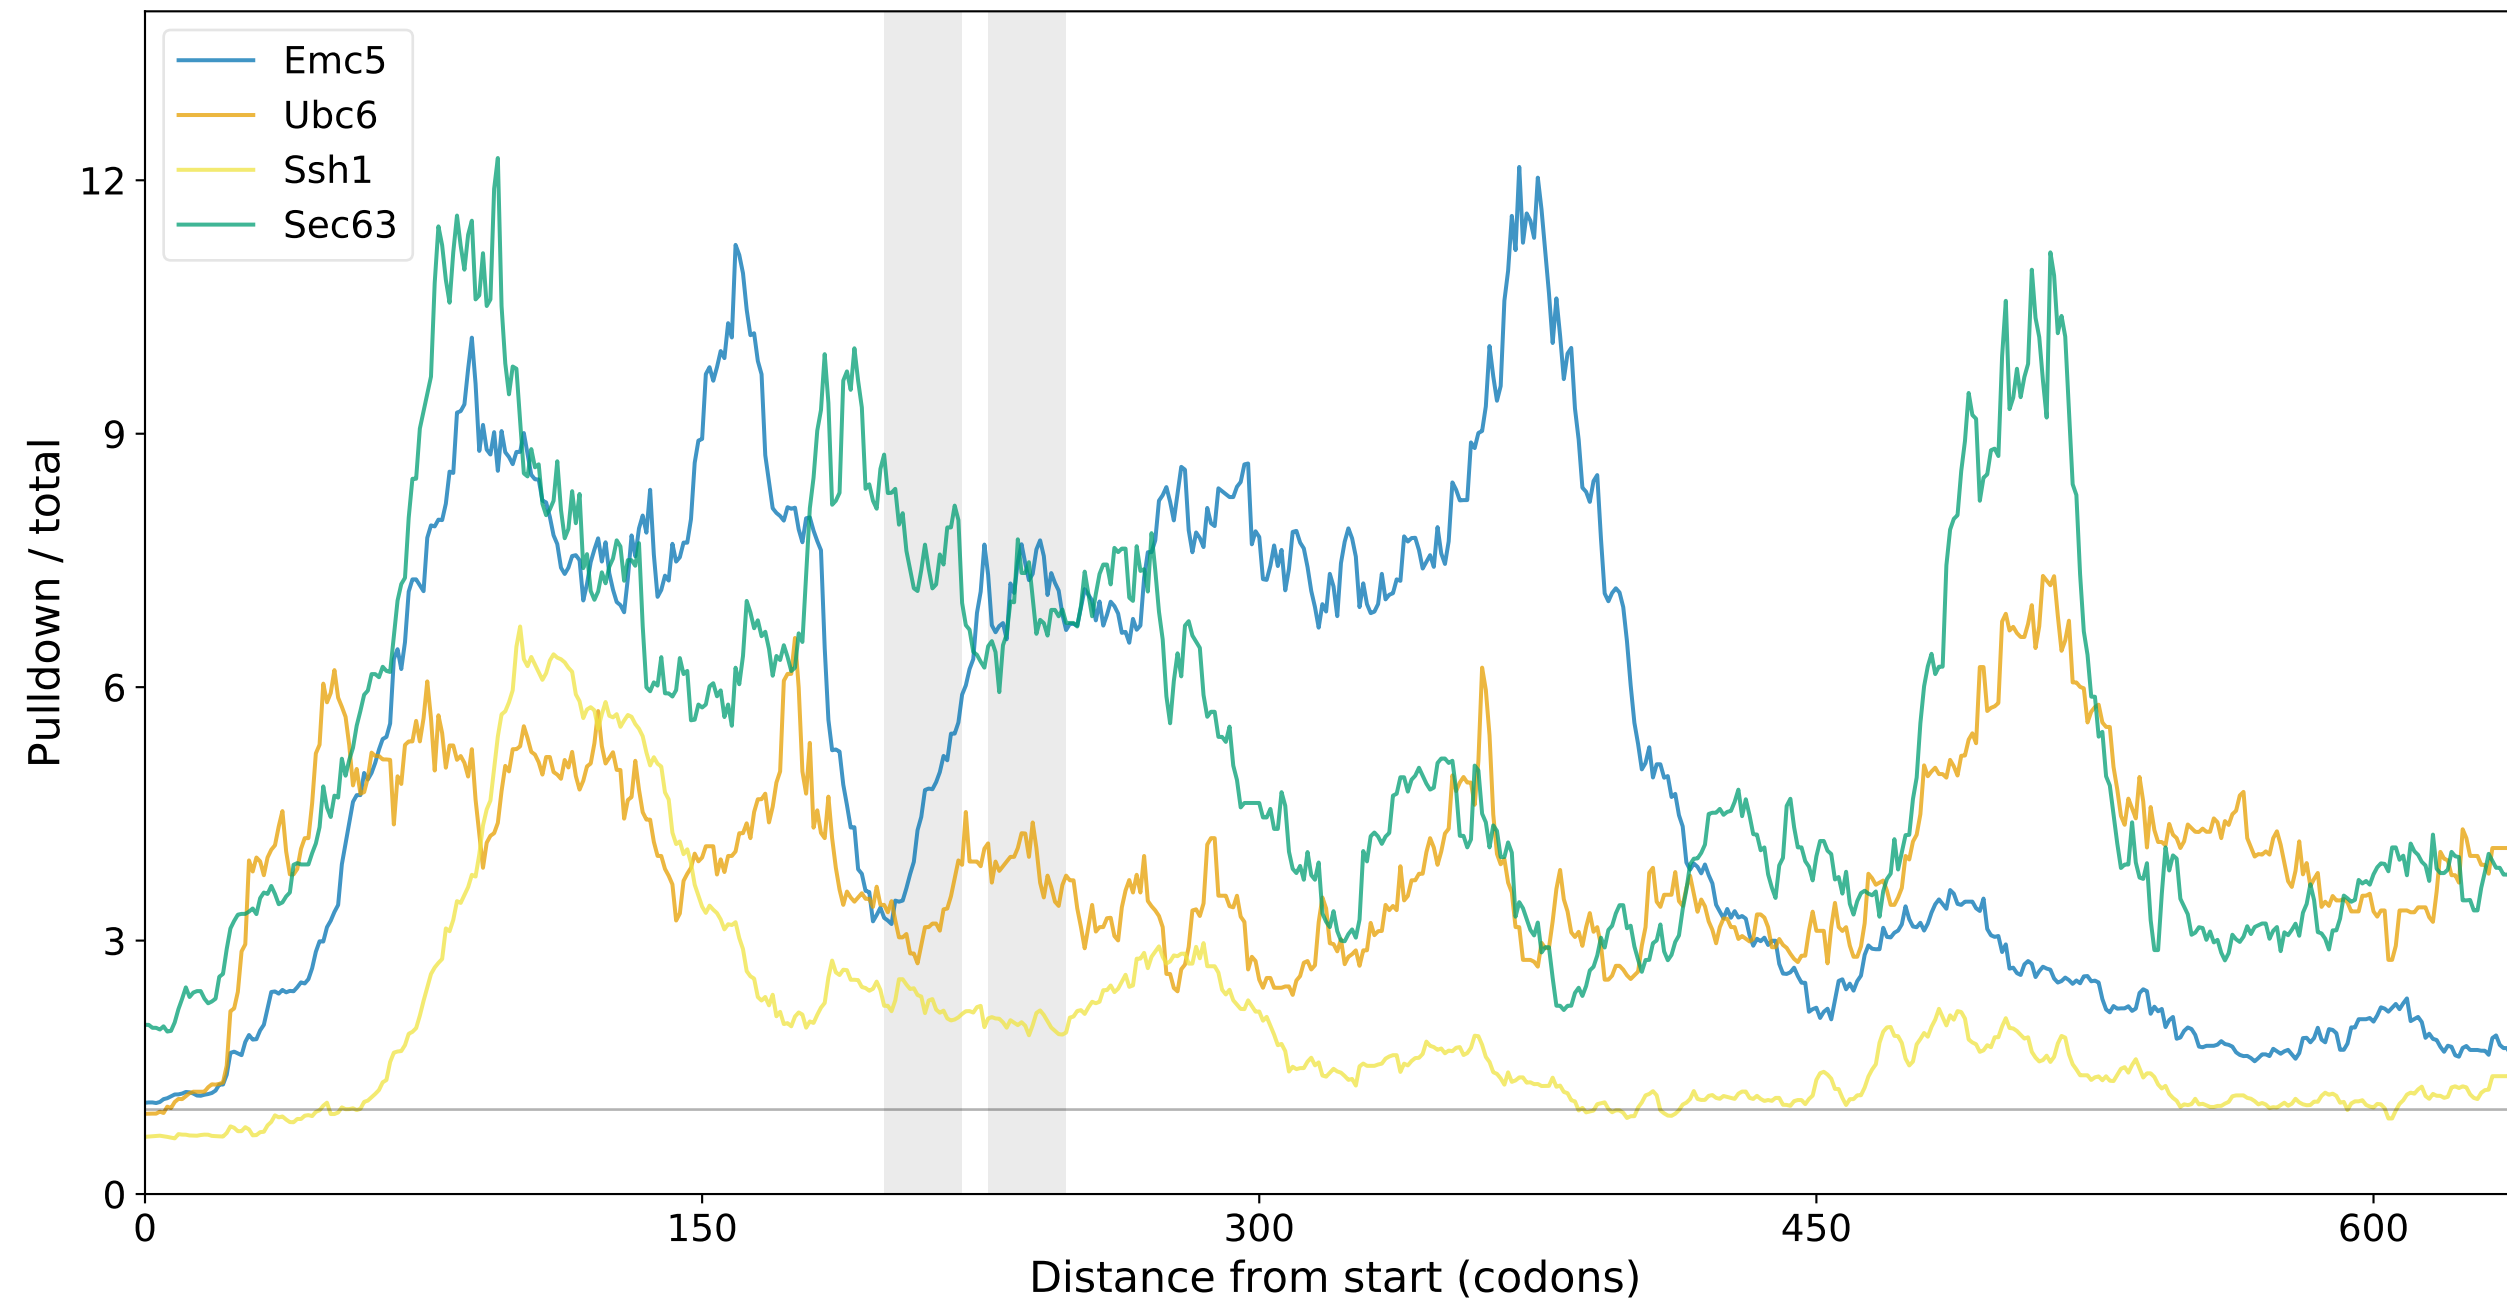



# ESBP6

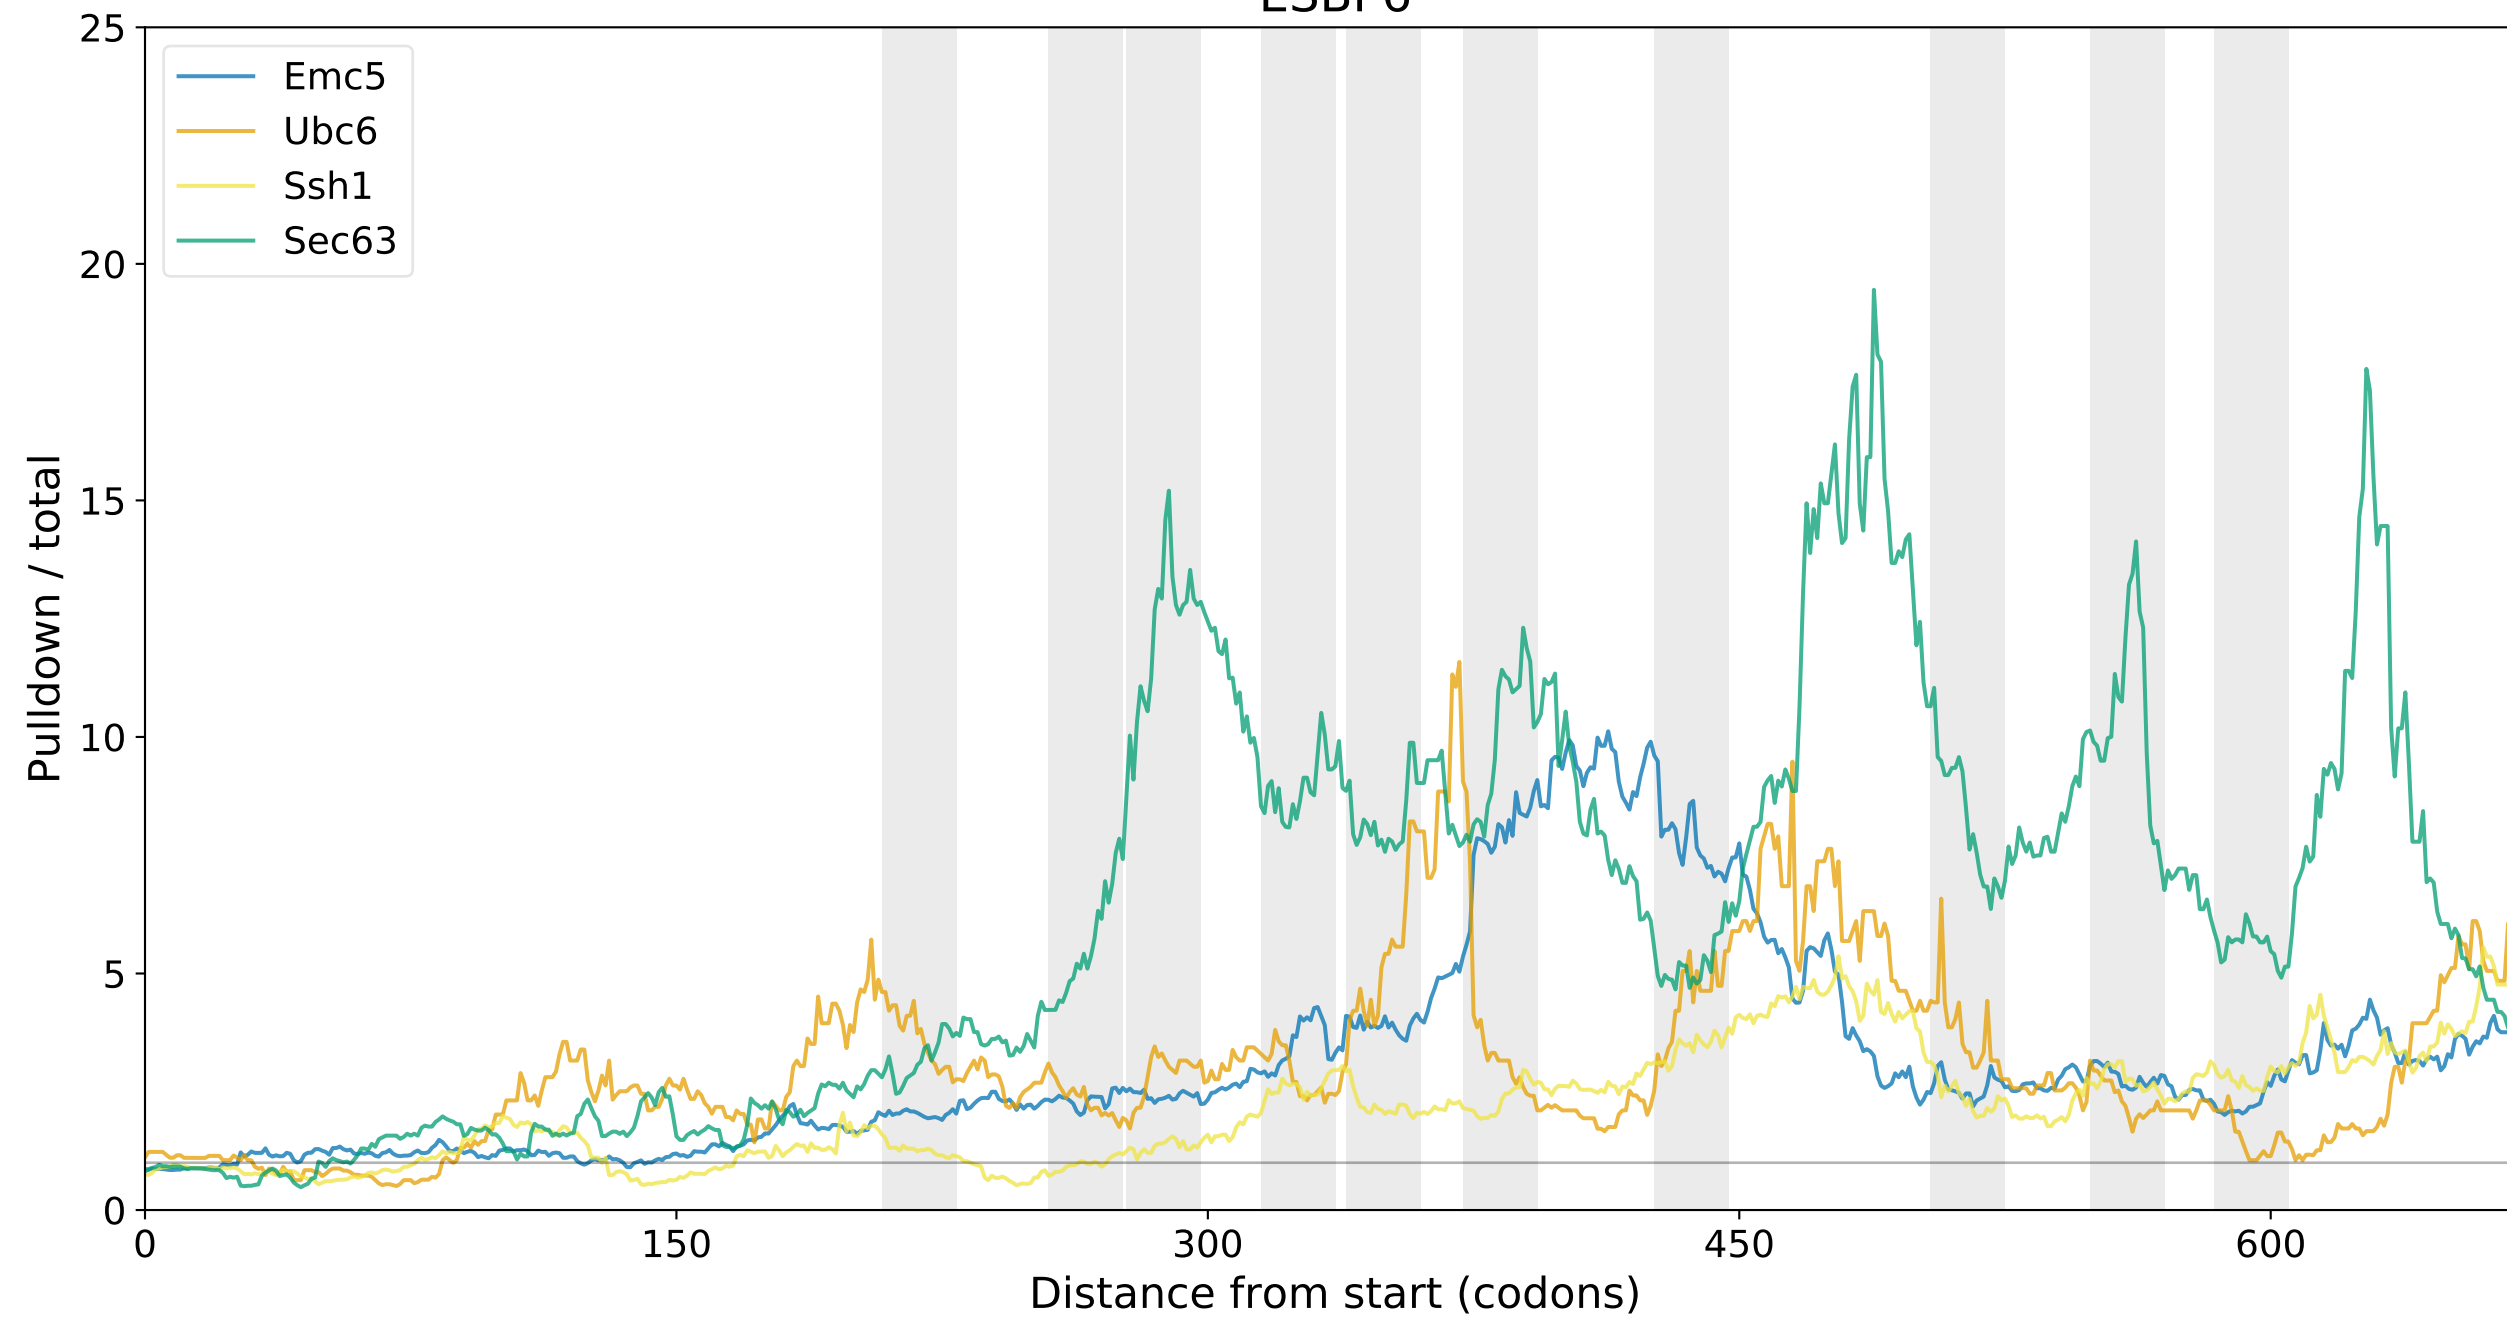

## YKR051W

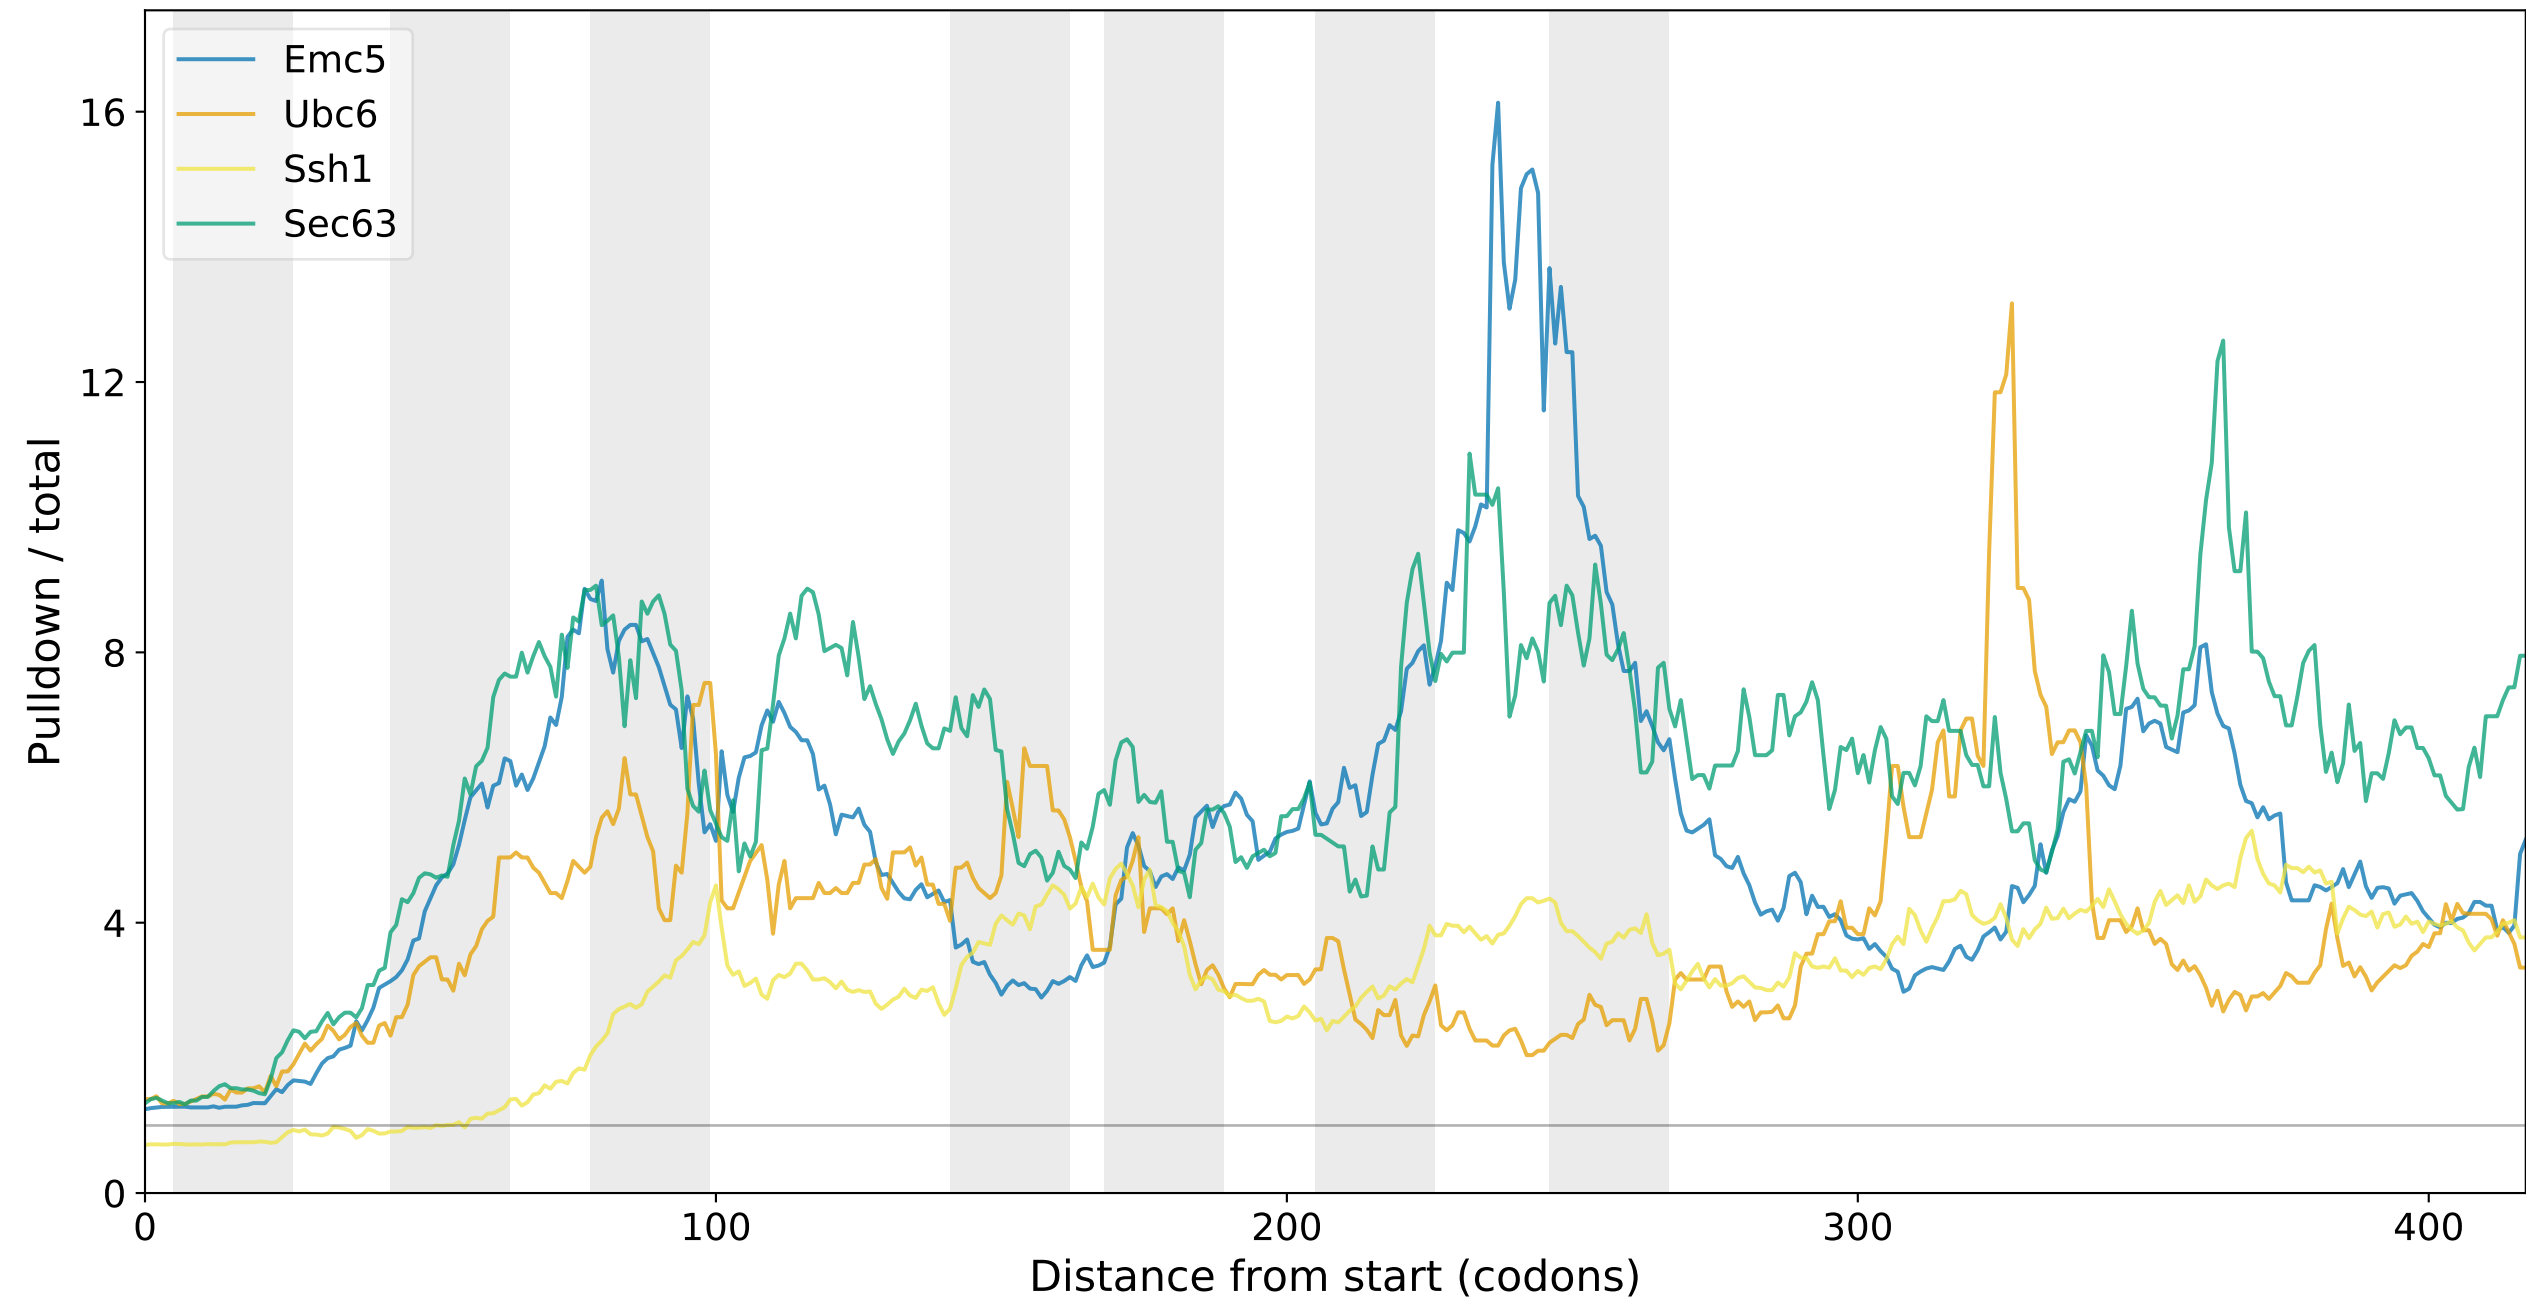

# PMA1

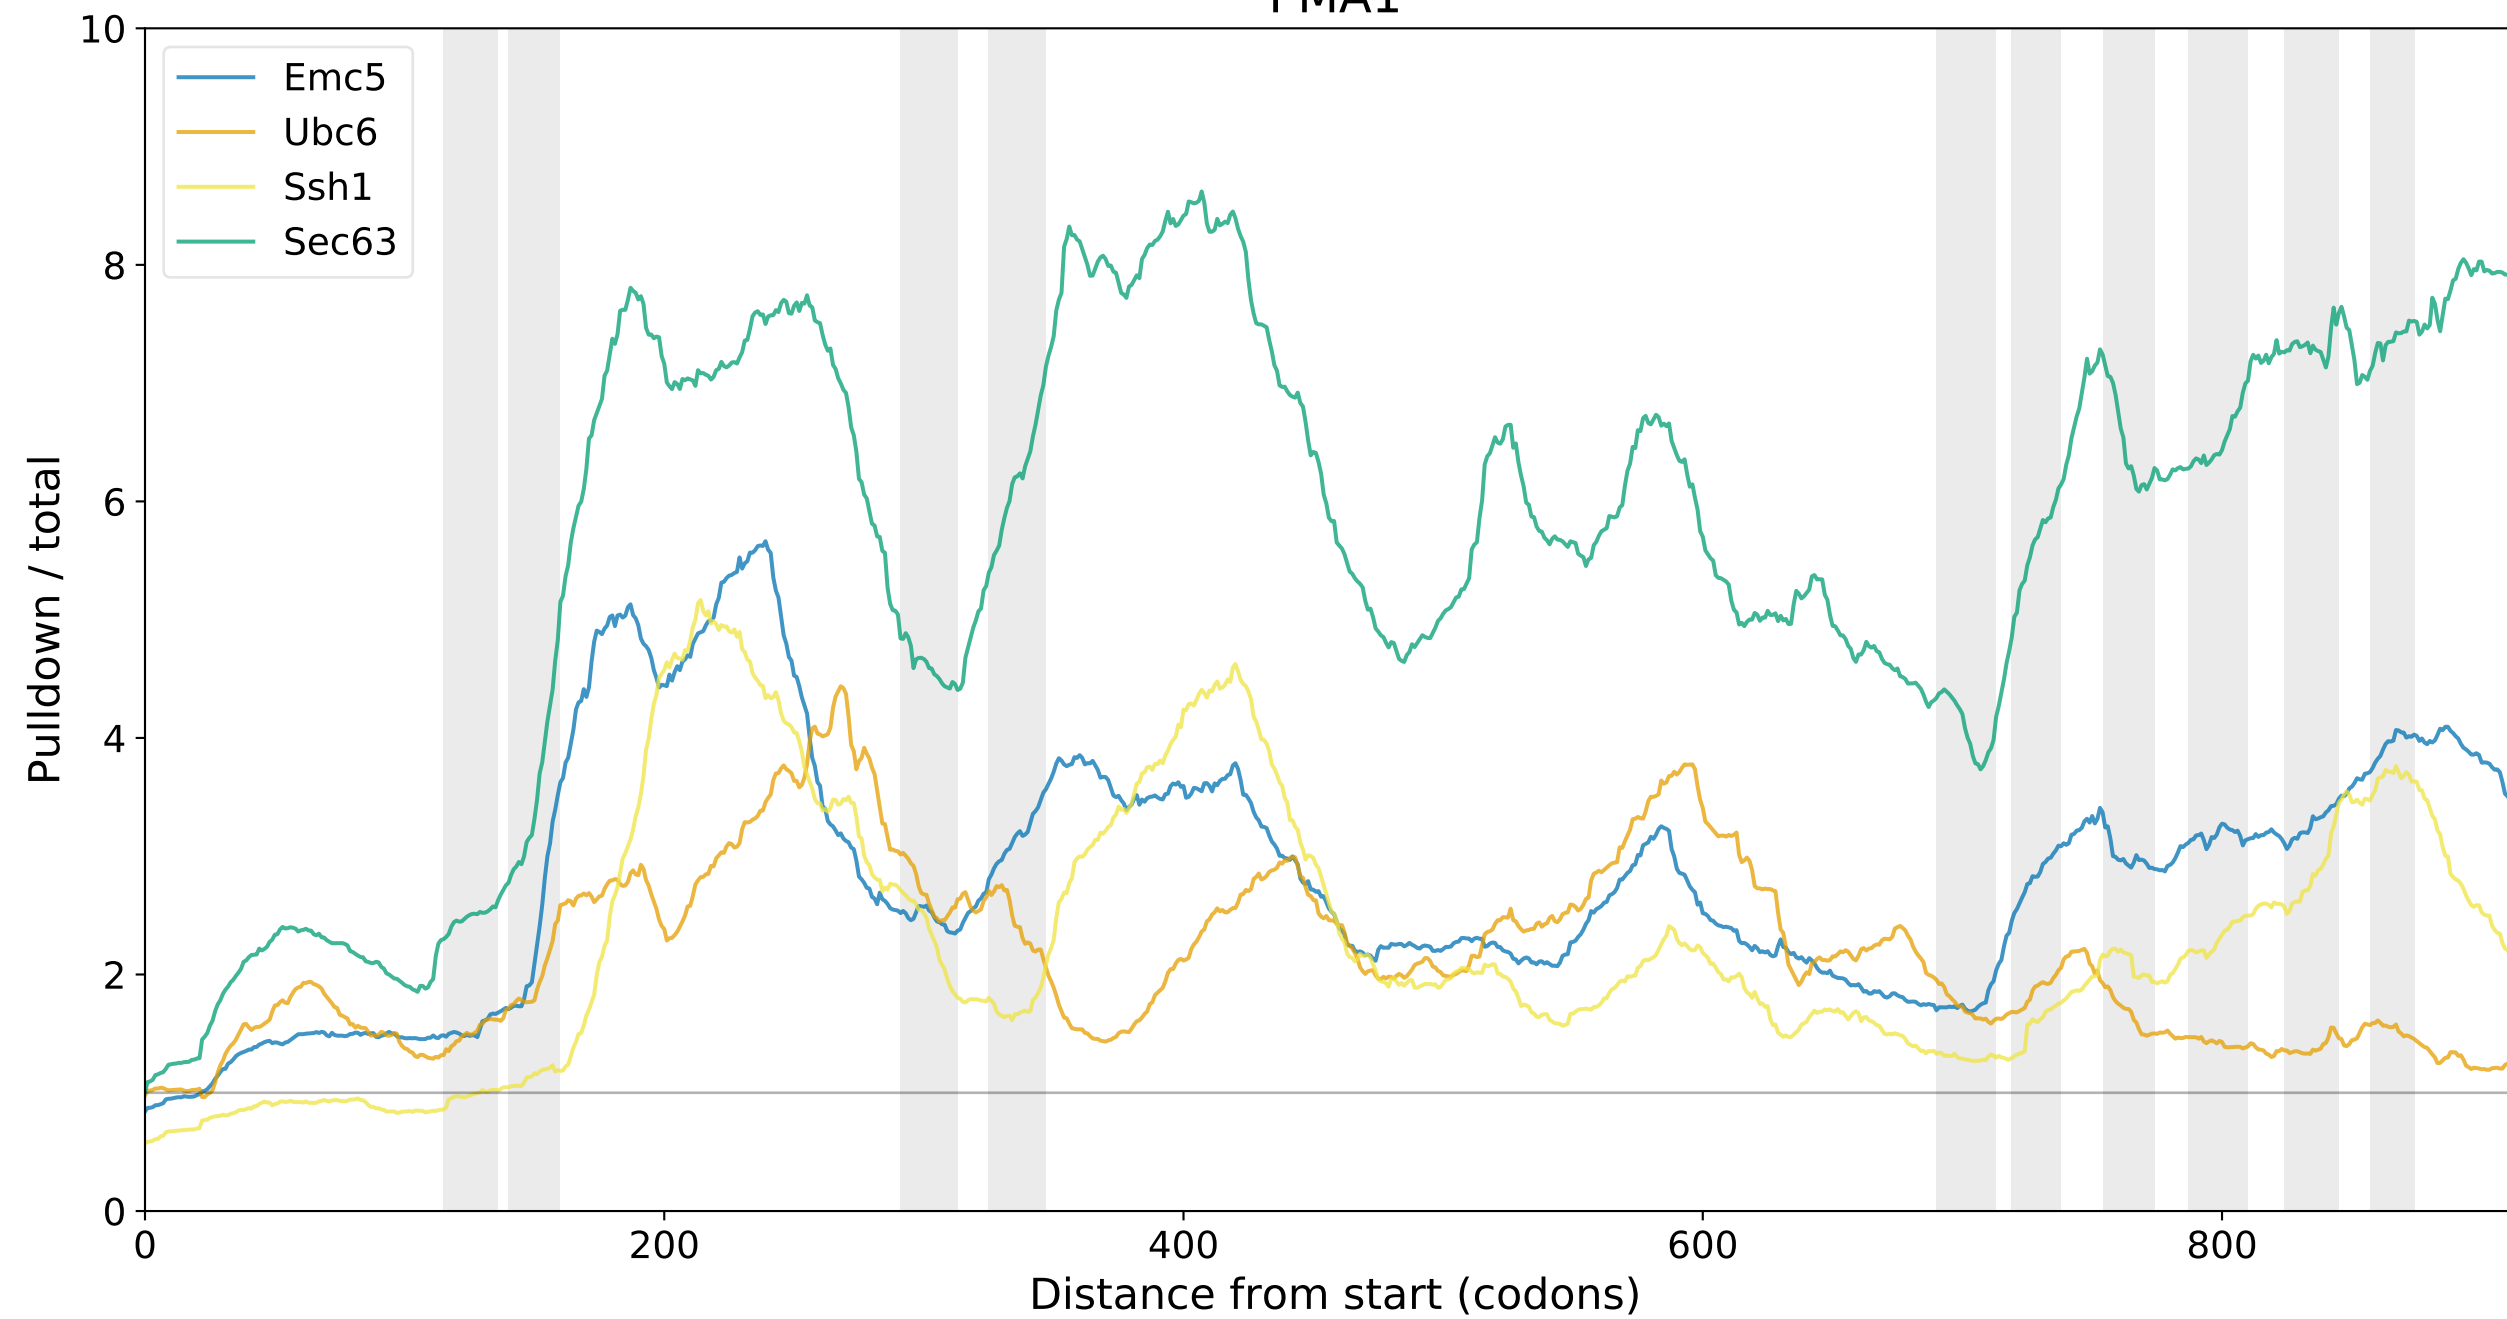

Supplement: supp [file elife-37018-supp-v1.zip]
