# Supplementary material for: The ER membrane protein complex interacts cotranslationally to enable biogenesis of multipass membrane proteins
Source: eLife journal article supplement (doi:10.7554/elife.37018), 2018-05-29
Supplement: supp [file elife-37018-supp-v1.zip]

A

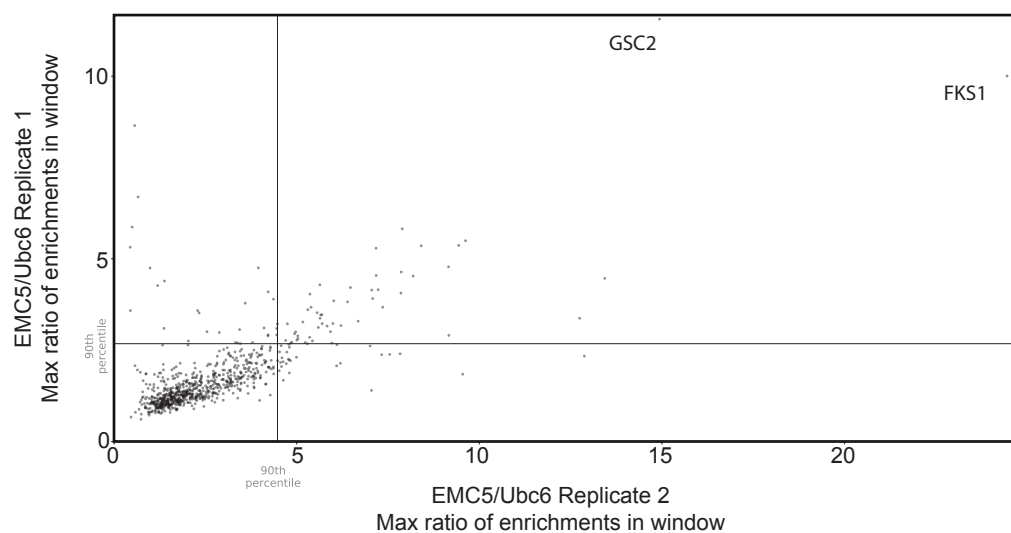

B

| Gene name | #TMDs |
|-----------|-------|
| GSC2      | 15    |
| FKS1      | 14    |
| BPT1      | 18    |
| YHL008C   | 7     |
| GPT2      | 5     |
| EMP65     | 6     |
| CHS2      | 7     |
| PDR12     | 13    |
| IZH3      | 7     |
| YGL114W   | 13    |
| PEX30     | 4     |
| NUR1      | 2     |
| YMD8      | 10    |
| YOR1      | 12    |
| GPI1      | 6     |
| DRS2      | 11    |
| LCB3      | 8     |
| PTR2      | 14    |
| YGL140C   | 12    |
| SNQ2      | 12    |
| GYP7      | 0     |
| PDR5      | 14    |
| PMT6      | 9     |
| YPL162C   | 5     |
| SUL2      | 13    |
| PHO87     | 12    |
| ALG8      | 13    |
| DGA1      | 4     |
| HIP1      | 12    |
| VPH1      | 8     |
| YPR003C   | 12    |
| SLY41     | 8     |
| OPT1      | 15    |
| BSC6      | 11    |
| ZSP1      | 0     |
| ENB1      | 12    |
| DNF1      | 10    |
| YKR051W   | 7     |
| ALG6      | 12    |
| YCF1      | 17    |
| YBT1      | 19    |
| SPF1      | 12    |
| TDA5      | 3     |
| ESBP6     | 10    |
| PNS1      | 10    |
| ICE2      | 10    |
| VPS73     | 12    |
| CPT1      | 8     |
| TGL3      | 2     |
| PMA1      | 10    |
| PHO90     | 13    |
