# Supplementary material for: The ER membrane protein complex interacts cotranslationally to enable biogenesis of multipass membrane proteins
Source: eLife journal article supplement (doi:10.7554/elife.37018), 2018-05-29
Supplement: supp [file elife-37018-supp-v1.zip]

Figure 5 - supplement 1

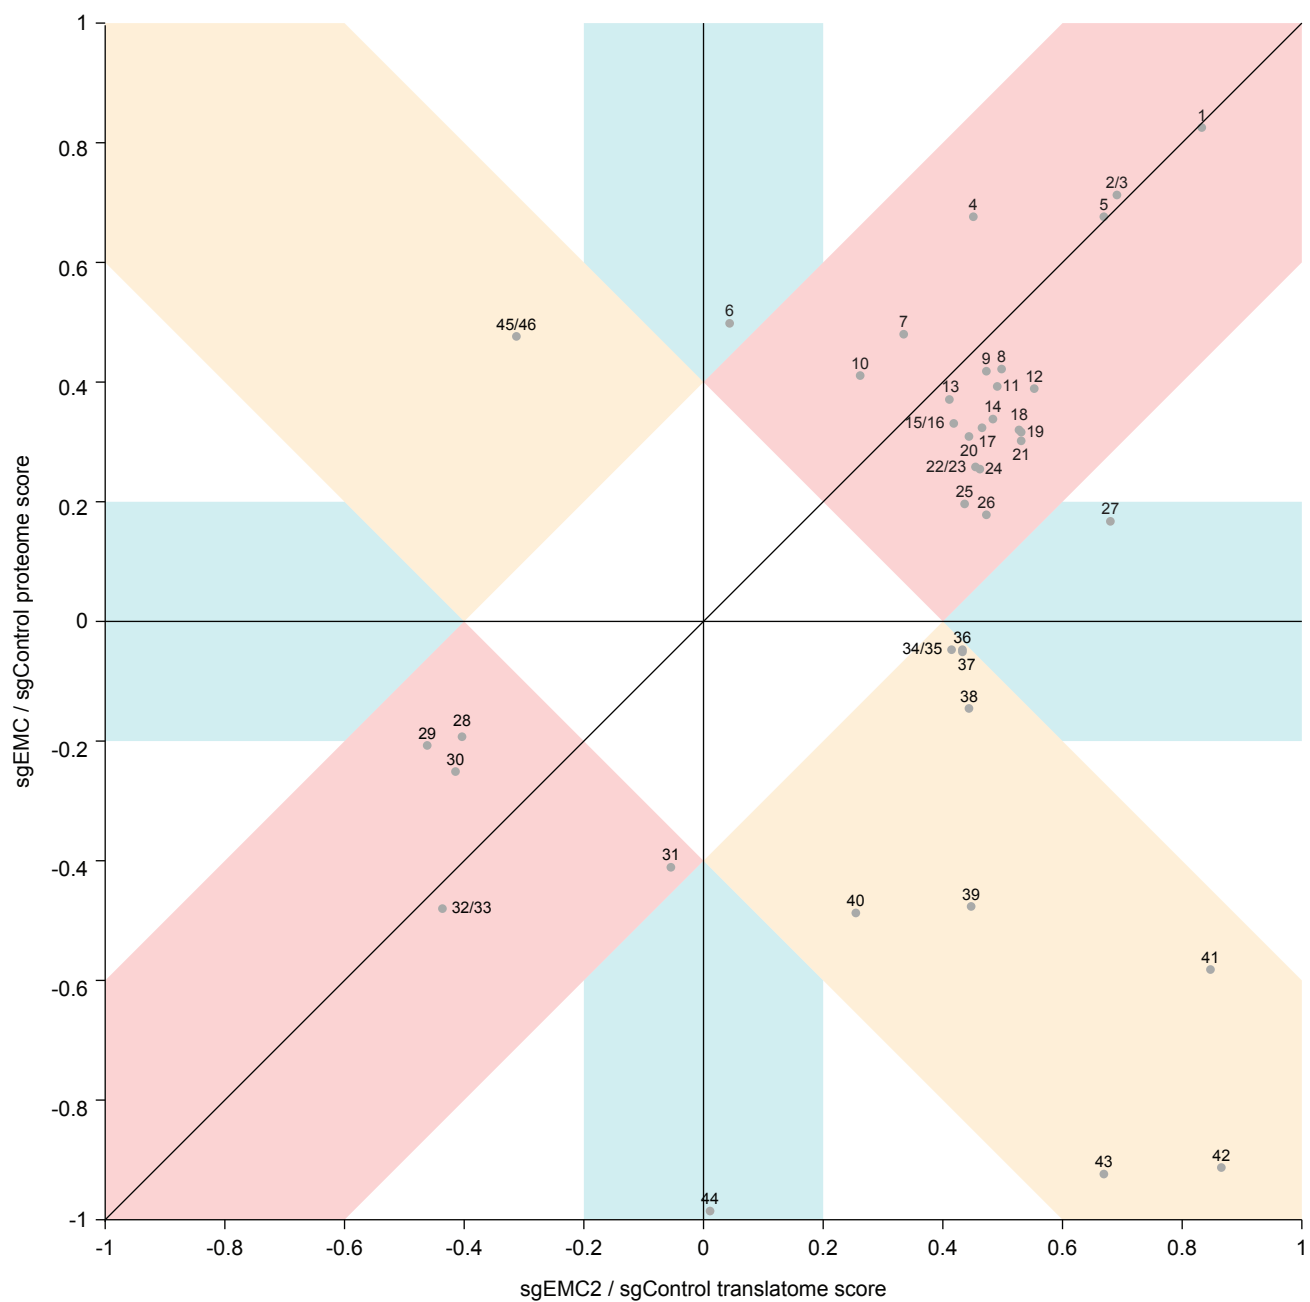

| #  | Type | Size | P value | Names                                                                                           | #  | Type | Size | P value | Names                                                          |
|----|------|------|---------|-------------------------------------------------------------------------------------------------|----|------|------|---------|----------------------------------------------------------------|
| 1  | GOMF | 9    | 1.7E-04 | collagen binding                                                                                | 24 | GOBP | 103  | 3.7E-09 | glycosylation                                                  |
| 2  | GOMF | 14   | 7.3E-05 | intramolecular oxidoreductase activity, transposing S-S bonds                                   | 25 | GOBP | 45   | 3.0E-04 | oligosaccharide metabolic process                              |
| 3  | GOMF | 14   | 7.3E-05 | protein disulfide isomerase activity                                                            | 26 | GOBP | 50   | 4.2E-05 | ER to Golgi vesicle-mediated transport                         |
| 4  | GOBP | 18   | 1.8E-04 | nucleotide-sugar metabolic process                                                              | 27 | GOCC | 23   | 6.4E-05 | endoplasmic reticulum-Golgi intermediate compartment membrane  |
| 5  | GOMF | 15   | 8.3E-05 | intramolecular oxidoreductase activity, interconverting keto- and enol-groups                   | 28 | GOBP | 68   | 3.9E-05 | DNA conformation change                                        |
| 6  | GOBP | 36   | 1.7E-04 | cellular response to biotic stimulus                                                            | 29 | GOBP | 40   | 3.1E-04 | DNA modification                                               |
| 7  | GOBP | 33   | 2.8E-04 | regulation of protein secretion                                                                 | 30 | GOBP | 49   | 2.0E-04 | chromatin assembly or disassembly                              |
| 8  | GOCC | 74   | 1.8E-09 | endoplasmic reticulum lumen                                                                     | 31 | GOBP | 73   | 1.4E-05 | mitochondrial translational elongation                         |
| 9  | GOBP | 33   | 1.0E-04 | vesicle coating                                                                                 | 32 | GOBP | 30   | 1.5E-04 | DNA strand elongation                                          |
| 10 | GOBP | 51   | 1.5E-04 | antigen processing and presentation of exogenous peptide antigen via MHC class I, TAP-dependent | 33 | GOBP | 30   | 1.5E-04 | DNA strand elongation involved in DNA replication              |
| 11 | GOBP | 39   | 2.7E-05 | cell redox homeostasis                                                                          | 34 | GOBP | 101  | 2.8E-08 | establishment of protein localization in endoplasmic reticulum |
| 12 | GOCC | 43   | 1.6E-06 | endoplasmic reticulum-Golgi intermediate compartment                                            | 35 | GOBP | 101  | 2.8E-08 | protein targeting to ER                                        |
| 13 | GOBP | 94   | 1.1E-08 | response to endoplasmic reticulum stress                                                        | 36 | GOBP | 96   | 1.6E-08 | SRP-dependent cotranslational protein targeting to membrane    |
| 14 | GOBP | 34   | 2.1E-04 | oligosaccharide biosynthetic process                                                            | 37 | GOBP | 97   | 1.0E-08 | cotranslational protein targeting to membrane                  |
| 15 | GOBP | 62   | 6.8E-06 | cellular response to unfolded protein                                                           | 38 | GOCC | 26   | 8.0E-04 | SNARE complex                                                  |
| 16 | GOBP | 62   | 6.8E-06 | endoplasmic reticulum unfolded protein response                                                 | 39 | GOBP | 14   | 3.0E-04 | glycosphingolipid metabolic process                            |
| 17 | GOCC | 42   | 6.9E-05 | integral to endoplasmic reticulum membrane                                                      | 40 | GOCC | 25   | 6.8E-05 | proton-transporting two-sector ATPase complex                  |
| 18 | GOBP | 73   | 9.0E-09 | peptidyl-asparagine modification                                                                | 41 | GOMF | 6    | 2.1E-04 | organic acid:sodium symporter activity                         |
| 19 | GOBP | 72   | 1.0E-08 | protein N-linked glycosylation via asparagine                                                   | 42 | GOMF | 4    | 1.9E-04 | serine-type carboxypeptidase activity                          |
| 20 | GOCC | 43   | 1.2E-04 | intrinsic to endoplasmic reticulum membrane                                                     | 43 | GOBP | 5    | 1.7E-04 | keratan sulfate catabolic process                              |
| 21 | GOBP | 73   | 9.1E-09 | protein N-linked glycosylation                                                                  | 44 | GOCC | 9    | 1.2E-04 | ER membrane protein complex                                    |
| 22 | GOBP | 101  | 8.8E-09 | macromolecule glycosylation                                                                     | 45 | GOCC | 29   | 6.8E-06 | actin filament bundle                                          |
| 23 | GOBP | 101  | 8.8E-09 | protein glycosylation                                                                           | 46 | GOCC | 29   | 6.8E-06 | stress fiber                                                   |
