# Supplementary material for: The ER membrane protein complex interacts cotranslationally to enable biogenesis of multipass membrane proteins
Source: eLife. 2018 May 29;7:e37018. doi: 10.7554/eLife.37018 (PMC5995541; doi:10.7554/eLife.37018)
Supplement: Supplementary file 1. — The number of transmembrane domains (TMDs), whether the protein enters the secretory pathway based on Uniprot annotation and the Log2 fold changes in protein abundance in EMC2 or EMC4 depleted cells compared to control cells expressing a non-targeting sgRNA (GAL4). [file elife-37018-supp1.xlsx]

## Sheet: Sheet1
UniProtKB/Swiss-Prot ID	Gene name	transmembrane segments	SecretoryPathway	HitClass1	HitClass2	HitClassUpregulated	Ratio L/H EMC4_L_Gal4_H_con_1	Ratio L/H EMC4_L_Gal4_H_con_2	Ratio L/H EMC4_L_Gal4_H_con_3	Mean L/H EMC4_L_Gal4_H	Ratio L/H EMC2_L_Gal4_H_con_1	Ratio L/H EMC2_L_Gal4_H_con_2	Ratio L/H EMC2_L_Gal4_H_con_3	Mean L/H EMC2_L_Gal4_H
Q9UHQ4	BCAP29	3	+	+			-1.43832	-1.59428	-1.75425	-1.59562	-1.67126	-1.18479	-1.3685	-1.40818
P37268	FDFT1	1	+	+			-1.34285	-1.39053	-1.40965	-1.38101	-1.37304	-1.38898	-1.29117	-1.35106
Q8WUX1	SLC38A5	11	+	+			-1.45248	-1.91022	-1.92041	-1.76104	-1.15379	-1.61561	-1.09338	-1.28759
Q9HD20	ATP13A1	10	+	+			-1.20221	-1.31225	-1.30972	-1.27473	-1.30027	-1.48677	-1.05663	-1.28122
P51572	BCAP31	3	+	+			-1.21655	-1.32495	-1.27039	-1.27063	-1.35502	-1.4946	-1.27133	-1.37365
Q4KMQ2	ANO6	8	+	+			-1.52624	-1.61211	-1.68069	-1.60635	-1.33332	-1.07506	-1.35886	-1.25575
Q15125	EBP	4	+	+			-1.12225	-1.27374	-1.23097	-1.20899	-1.15598	-1.26582	-1.14598	-1.18926
Q96S97	MYADM	8	+	+			-1.52993	-1.43362	-1.34194	-1.43516	-1.18533	-1.18797	-1.10023	-1.15784
O43688	PLPP2	6	+	+			-0.949064	-1.18002	-1.03161	-1.05356	-1.12345	-1.25132	-1.26713	-1.21397
Q9NSU2	TREX1	1	+	+			-1.54005	-1.32387	-1.37457	-1.41283	-1.0411	-1.05132	-1.04325	-1.04522
P61421	ATP6V0D1	0		+			-1.01016	-1.0114	-1.01982	-1.01379	-1.13562	-1.10607	-1.01075	-1.08415
P23634	ATP2B4	10	+		+		-0.949489	-1.02633	-0.947071	-0.974295	-0.970547	-1.1073	-0.945972	-1.00794
Q9UNQ0	ABCG2	6	+		+		-0.862174	-1.05735	-0.864159	-0.927893	-0.915001	-0.924422	-0.825438	-0.888287
P30408	TM4SF1	4	+		+		-0.800928	-0.863911	-0.795581	-0.82014	-0.940696	-0.78931	-0.779993	-0.836666
Q8NBI5	SLC43A3	12	+		+		-0.647766	-0.888981	-0.787359	-0.774702	-0.729448	-0.883094	-0.763213	-0.791918
Q5BJF2	TMEM97	4	+		+		-0.733304	-0.859144	-0.856224	-0.816224	-0.620089	-0.944904	-0.750677	-0.77189
P43003	SLC1A3	8	+		+		-0.733022	-0.985838	-0.628629	-0.782497	-0.819994	-0.720713	-0.722611	-0.754439
P04920	SLC4A2	10	+		+		-0.674816	-0.84345	-0.733721	-0.750663	-0.745845	-0.799832	-0.774084	-0.773253
Q8WWI5	SLC44A1	9	+		+		-1.37312	-1.51585	-1.21961	-1.36952	-0.463887	-0.931671	-0.851073	-0.748877
P35610	SOAT1	5	+		+		-0.715213	-0.817569	-0.667795	-0.733526	-0.817175	-0.887619	-0.661674	-0.788823
P31641	SLC6A6	12	+		+		-0.928767	-0.934406	-0.940921	-0.934698	-0.689997	-0.743527	-0.757392	-0.730305
Q9UBR2	CTSZ	0	+		+		-0.627424	-0.767792	-0.710124	-0.70178	-0.901259	-0.891755	-0.891495	-0.894836
Q9H7F0	ATP13A3	11	+		+		-1.00018	-1.2153	-1.14636	-1.12061	-0.684144	-0.863931	-0.546527	-0.6982
Q9H2H9	SLC38A1	11	+		+		-0.843353	-0.978049	-0.874483	-0.898629	-0.794843	-0.70302	-0.595582	-0.697815
Q9P1T7	MDFIC	0	+		+		-0.955848	-0.98988	-0.883341	-0.943023	-0.863847	-0.731913	-0.490253	-0.695338
Q9BRK5	SDF4	0	+		+		-0.623474	-0.781771	-0.654131	-0.686459	-0.694676	-0.873012	-0.813054	-0.793581
Q9UJG1	MOSPD1	2	+		+		-0.775956	-0.692352	-0.577841	-0.682049	-0.915825	-0.913812	-0.701382	-0.843673
P13284	IFI30	0	+		+		-0.650904	-0.763533	-0.497411	-0.637283	-1.14609	-1.22611	-1.11149	-1.16123
Q92820	GGH	0	+		+		-0.538552	-0.740504	-0.631288	-0.636782	-1.08399	-1.00195	-0.95411	-1.01335
O00746	NME4	0			+		-0.512826	-0.677635	-0.710019	-0.633493	-0.728635	-0.775458	-0.725918	-0.743337
Q9UM22	EPDR1	1	+		+		-0.693635	-0.674642	-0.52353	-0.630602	-0.672364	-0.995535	-0.886171	-0.851357
Q9NZC3	GDE1	2	+		+		-1.05936	-0.616295	-0.854708	-0.843454	-0.459676	-0.756532	-0.610233	-0.608814
Q96S66	CLCC1	3	+		+		-0.594425	-0.674156	-0.504922	-0.591168	-0.682015	-0.671089	-0.545249	-0.632784
P61073	CXCR4	7	+		+		-0.687826	-0.759033	-0.320607	-0.589155	-1.12065	-1.29689	-1.19359	-1.20371
P20020	ATP2B1	10	+		+		-0.558188	-0.73111	-0.572662	-0.620653	-0.566409	-0.639419	-0.491675	-0.565834
Q9GZM5	YIPF3	5	+		+		-0.526479	-0.841576	-0.438659	-0.602238	-0.513195	-0.595743	-0.525669	-0.544869
P10619	CTSA	0	+		+		-0.523547	-0.541077	-0.487539	-0.517388	-0.58586	-0.720036	-0.580158	-0.628685
Q5J8M3	EMC4	2	+				-2.84489	-2.76887	-3.04605	-2.8866	-1.66882	-2.10344	-1.73391	-1.83539
Q93050	ATP6V0A1	8	+				-1.23554	-1.28126	-1.10303	-1.20661	-1.31666	-1.53622	-1.07945	-1.31077
Q96NT0	CCDC115	0					-0.587422	-0.634731	-0.392251	-0.538135	-0.473019	-0.643795	-0.474997	-0.530604
P32754	HPD	0					-1.05067	-0.660561	-1.01423	-0.908487	-0.859173	-0.784869	-0.951701	-0.865248
Q92508	PIEZO1	36	+				-1.10905	-1.0281	-1.19772	-1.11163	-1.00661	-1.05045	-0.820844	-0.959302
Q6AZY7	SCARA3	1	+				-0.587656	-0.736397	-0.465853	-0.596635	-0.823392	-0.708658	-0.671997	-0.734682
Q92604	LPGAT1	2	+				-0.623778	-0.712295	-0.730005	-0.688693	-0.59939	-0.624856	-0.457541	-0.560595
Q9Y546	LRRC42	0					-0.678116	-0.681026	-0.68656	-0.681901	-0.55595	-0.87916	-0.82634	-0.753817
P21926	CD9	4	+				-0.573942	-0.753445	-0.505284	-0.610891	-0.541862	-0.541256	-0.490917	-0.524679
O95672	ECEL1	1	+				-0.395835	-0.607073	-0.651623	-0.55151	-0.637304	-0.828123	-0.686226	-0.717218
P37840	SNCA	0					-1.01742	-0.539655	-1.00725	-0.854775	-0.663957	-1.02862	-1.172	-0.954859
Q24JP5	TMEM132A	1	+				-0.463103	-0.650136	-0.55328	-0.555506	-0.656223	-0.705158	-0.570321	-0.643901
P12532	CKMT1B	0	+				-0.572839	-0.718437	-0.73238	-0.674552	-0.767057	-0.803748	-0.701792	-0.757532
P0CW18	PRSS56	0	+				-0.563353	-0.556192	-0.56677	-0.562105	-0.831621	-0.783574	-0.77533	-0.796842
O43681	ASNA1	0					-0.673714	-0.386377	-0.596218	-0.552103	-0.508325	-0.467603	-0.57498	-0.516969
Q9H568	ACTL8	0					-0.653887	-0.71403	-0.736502	-0.701473	-0.807799	-0.726619	-0.736832	-0.757083
P84085	ARF5	0					0.455119	0.20169	0.0176655	0.224825	0.25181	0.1653	0.0570739	0.158061
P20645	M6PR	1	+				-0.18839	-0.224294	-0.155579	-0.189421	-0.386377	-0.390306	-0.289046	-0.355243
Q02790	FKBP4	0					-0.173294	0.167021	-0.0110001	-0.00575778	0.0046683	0.110153	-0.0343626	0.0268197
Q7L592	NDUFAF7	0					-0.0426136	0.0678963	0.124245	0.0498427	-0.0076436	0.00572374	0.0746457	0.0242419
Q9BTY2	FUCA2	0	+				-0.150983	-0.27614	0.0213152	-0.135269	-0.270266	-0.563393	-0.227902	-0.353853
Q16850	CYP51A1	1	+				0.108656	-0.0636075	0.0235266	0.0228585	-0.219756	-0.370182	-0.298611	-0.296183
Q96RU2	USP28	0					-0.0503312	-0.0550463	-0.0722488	-0.0592087	-0.107536	-0.0667024	-0.123042	-0.0990935
P11233	RALA	0					0.0621498	0.0152063	0.103152	0.0601693	0.0248622	-0.0460691	0.118479	0.0324241
Q9UHR4	BAIAP2L1	0					-0.0646348	0.0450407	-0.0937297	-0.0377746	-0.0298276	-0.0975	-0.0420182	-0.0564486
Q9H6T3	RPAP3	0					-0.115504	0.0765954	0.0125367	-0.00879071	-0.0188294	0.0797242	-0.0081047	0.0175967
Q9UJK0	TSR3	0					-0.000234345	-0.127017	-0.127146	-0.0847991	0.0493025	-0.186502	0.0439653	-0.031078
Q96S59	RANBP9	0					-0.196902	-0.0959024	-0.0859158	-0.12624	-0.0901286	0.0951786	-0.0730009	-0.0226503
Q9NXS2	QPCTL	1					0.0910715	0.00155217	0.181332	0.0913184	0.102238	0.097353	0.197327	0.132306
P26599	PTBP1	0					0.0729584	-0.00786501	0.0655417	0.043545	-0.00815858	-0.0308756	0.0209362	-0.00603266
Q8NFJ5	GPRC5A	7	+				-0.887611	-0.953091	-0.855087	-0.898596	-0.275837	-0.363483	-0.283365	-0.307561
Q9NRV9	HEBP1	0					-0.0244057	0.140001	-0.134334	-0.00624634	0.09293	-0.0393062	-0.0103553	0.0144228
Q9UET6	FTSJ1	0					-0.263738	0.235645	-0.104088	-0.0440604	0.235501	-0.0518601	-0.143209	0.0134773
Q9Y277	VDAC3	19					0.036078	-0.0439278	0.0611165	0.0177556	-0.0536727	-0.0704225	0.019585	-0.0348367
P60520	GABARAPL2	0					-0.173606	0.0763227	-0.15154	-0.0829411	-0.205277	-0.224441	-0.0774274	-0.169048
Q96C01	FAM136A	0					-0.0548514	-0.0787441	-0.0703068	-0.0679674	-0.222688	-0.179753	-0.124631	-0.175691
Q96AE7	TTC17	0					0.237315	-0.132453	0.131289	0.0787174	0.39822	0.16655	0.25324	0.27267
Q9BV20	MRI1	0					-0.494723	-0.0932387	-0.386623	-0.324862	-0.218065	-0.099712	-0.350738	-0.222838
Q8NFC6	BOD1L1	0					0.180424	-0.195003	0.115414	0.0336119	0.0552089	-0.171117	0.0175605	-0.0327824
Q13395	TARBP1	0					-0.424064	0.033218	-0.194607	-0.195151	-0.279767	-0.162055	-0.0780587	-0.173293
Q9HD26	GOPC	0					0.210487	0.230053	0.307571	0.24937	0.281085	0.285642	0.333147	0.299958
P82664	MRPS10	0					0.157627	0.0887805	0.118166	0.121524	-0.0108337	0.0134375	0.18375	0.0621178
P28799	GRN	0	+				0.305786	0.274665	0.212343	0.264265	0.233674	0.212433	0.219107	0.221738
Q15836	VAMP3	1	+				-0.0674339	-0.111065	-0.0139068	-0.0641352	-0.160574	-0.255818	-0.0713534	-0.162582
Q15293	RCN1	0	+				0.079012	-0.0827782	0.0906276	0.0289538	0.0286603	0.0298433	0.103128	0.0538772
P35250	RFC2	0					-0.00818124	-0.0792337	-0.0166383	-0.0346844	-0.0824218	-0.0511879	0.00320117	-0.0434695
Q12774	ARHGEF5	0					-0.0139967	0.0826066	-0.0741558	-0.00184864	0.0200233	-0.0395772	0.360358	0.113601
Q8TDB8	SLC2A14	12	+				0.237039	0.145568	0.231299	0.204635	0.31238	0.276061	0.396311	0.328251
P29992	GNA11	0					0.0418581	-0.00593493	0.0921803	0.0427012	-0.124737	-0.0738681	0.0277113	-0.0569644
P82673	MRPS35	0					0.209944	0.0583066	0.0403379	0.102863	-0.0405412	-0.0394417	-0.0177443	-0.0325757
Q9Y6I3	EPN1	0					-0.110953	-0.00889323	0.0106355	-0.0364036	-0.00155263	-0.0991919	-0.0680527	-0.0562657
Q9BXW7	HDHD5	0					-0.00957909	-0.129619	-0.0258632	-0.0550205	-0.128721	-0.119212	-0.0757849	-0.107906
Q92917	GPKOW	0					-0.00946267	-0.00258343	-0.0238746	-0.0119736	-0.0334752	0.0271433	0.00868644	0.000784859
O60306	AQR	0					0.0949467	-0.0277857	0.0790983	0.0487531	-0.0878891	-0.116773	-0.0913764	-0.0986796
O95983	MBD3	0					-0.0516887	-0.0544238	0.326668	0.0735186	-0.050676	-0.133889	0.0644392	-0.040042
Q96RK0	CIC	0					-0.136662	0.848612	-0.139729	0.190741	-0.217175	0.0473012	0.3644	0.0648422
Q14807	KIF22	0					-0.0420446	-0.11262	-0.133569	-0.0960777	-0.168797	-0.236435	-0.104696	-0.169976
Q9H6S0	YTHDC2	0					-0.209729	-0.121085	-0.125481	-0.152098	-0.132977	-0.0704225	-0.121695	-0.108365
P19438	TNFRSF1A	1	+				0.397818	0.372381	0.497908	0.422702	0.274931	0.532195	0.503594	0.436907
Q8TBA6	GOLGA5	1	+				0.131714	-0.0228312	0.0871081	0.0653302	-0.174131	0.0199209	0.117019	-0.0123968
O95633	FSTL3	0	+			+	0.383833	0.627518	0.573512	0.528288	0.442149	0.630357	0.533753	0.53542
Q15645	TRIP13	0					-0.124241	0.165831	-0.119417	-0.0259423	0.0478031	0.11229	-0.0111488	0.0496482
Q6P1M3	LLGL2	0					0.569069	0.508289	0.133075	0.403477	-0.118358	-0.323516	0.500123	0.0194164
Q99714	HSD17B10	0					-0.00608198	-0.117634	-0.0146029	-0.0461062	-0.0960516	-0.100232	-0.0110166	-0.0691001
Q9BVV7	TIMM21	1					0.230424	0.00621906	0.0247124	0.0871184	-0.127489	-0.106587	0.04424	-0.0632785
Q96CN7	ISOC1	0					-0.402146	-0.0782543	-0.133772	-0.204724	-0.0698466	-0.0938493	-0.231084	-0.131593
Q99583	MNT	0					0.160506	-0.0342389	0.0317937	0.052687	0.0701357	-0.167523	0.105563	0.00272506
O94804	STK10	0					0.0236337	0.221436	0.000223044	0.0817643	0.279953	0.225307	0.154804	0.220021
Q9NQ88	TIGAR	0					-0.356463	0.277091	-0.106097	-0.0618227	0.0971334	0.143637	-0.00903176	0.0772462
Q6AI08	HEATR6	0					-0.0883106	-0.110466	-0.184609	-0.127795	0.0500529	0.0738175	0.0430041	0.0556248
O75330	HMMR	0					-0.0413613	0.145139	-0.0996306	0.00138223	0.00352563	-0.025821	0.0493323	0.0090123
Q92545	TMEM131	2	+				-0.94298	-0.0771518	0.0101864	-0.336649	0.287012	0.0532594	-0.372308	-0.0106788
Q9GZN1	ACTR6	0					-0.0549643	0.0718315	-0.086804	-0.0233122	0.0467328	-0.0702897	0.0406723	0.00570515
Q6BDS2	UHRF1BP1	0					-0.161291	0.0630259	-0.0657925	-0.054686	0.120587	0.383735	-0.18916	0.105054
Q86WC4	OSTM1	1	+				0.129147	0.0454409	0.199193	0.124594	-0.00217317	-0.170621	0.181572	0.00292578
P12814	ACTN1	0					0.186413	0.211043	0.350977	0.249478	0.194037	0.286015	0.312847	0.2643
Q9Y547	HSPB11	0					-0.692112	-0.320195	-0.632837	-0.548381	-0.436522	-0.465788	-0.582829	-0.495047
Q02809	PLOD1	0	+				0.0352371	-0.00245439	0.0586144	0.0304657	-0.00671623	0.0514821	0.0527833	0.0325164
P55809	OXCT1	0					0.135185	-0.0109476	0.143302	0.0891796	0.126002	0.162943	0.238358	0.175767
Q9UNQ2	DIMT1	0					0.0380022	-0.0898413	0.00441337	-0.0158086	-0.0642114	-0.0775697	-0.00239624	-0.0480591
Q9BQI3	EIF2AK1	0					-0.129715	-0.16925	-0.417119	-0.238695	0.228325	0.217543	-0.00385877	0.147337
Q9NW64	RBM22	0					0.0504503	-0.0409149	0.0176133	0.00904959	-0.0468712	0.0148446	0.00106624	-0.0103201
O43264	ZW10	0					0.0124777	0.18575	0.0209323	0.0730535	0.0673116	0.126228	0.045752	0.0797638
Q15654	TRIP6	0					-0.178585	0.13247	-0.0398911	-0.0286688	0.0061235	-0.000139227	0.000666279	0.00221685
Q9NUG6	PDRG1	0					-0.33785	-0.0356271	-0.254447	-0.209308	-0.221001	0.112712	-0.0635974	-0.0572954
Q9H501	ESF1	0					0.185746	-0.0533029	0.0705204	0.0676547	-0.0444631	-0.148167	-0.031367	-0.0746655
Q9UJA5	TRMT6	0					0.0263767	-0.0545483	-0.0266377	-0.0182698	-0.136938	-0.0877005	0.00186652	-0.0742575
P31930	UQCRC1	0					-0.0223301	-0.170169	-0.0723794	-0.0882929	-0.166492	-0.127144	-0.0874942	-0.127043
Q01664	TFAP4	0					-0.171318	-0.137868	-0.0817256	-0.130304	-0.082813	-0.245983	-0.184478	-0.171091
O75391	SPAG7	0					-0.27647	0.0627558	-0.30598	-0.173231	0.332975	-0.201603	-0.477296	-0.115308
Q06323	PSME1	0					-0.181999	0.219072	-0.0911567	-0.018028	0.128377	0.174894	0.0436907	0.115654
Q9NPF4	OSGEP	0					-0.114747	0.00686843	-0.348482	-0.15212	-0.0872069	0.254594	-0.158331	0.00301865
Q70J99	UNC13D	0					-0.000468729	0.339881	-0.0326847	0.102242	-0.261394	-0.293137	-0.2959	-0.283477
Q99741	CDC6	0					0.0890753	0.210205	-0.0419577	0.0857742	0.300469	-0.0134514	0.107428	0.131482
Q9NRG9	AAAS	0					0.104618	0.0385195	0.108373	0.0838369	-0.00537534	0.0635891	0.0821016	0.0467718
P49366	DHPS	0					-0.228758	0.334524	-0.0783841	0.00912726	0.199497	0.298898	0.148942	0.215779
Q9NR45	NANS	0					-0.196391	0.185618	-0.061412	-0.0240616	0.205694	0.271968	0.0633251	0.180329
Q96EB6	SIRT1	0					-0.182618	0.0592492	-0.0627095	-0.0620263	-0.0198513	0.0155485	-0.0665266	-0.0236098
Q13445	TMED1	1	+				0.130173	-0.00606359	0.0149949	0.0463682	0.023809	-0.0300572	0.0275755	0.00710912
Q8WUZ0	BCL7C	0					-0.0179378	-0.173956	0.101312	-0.0301941	-0.0539721	-0.16802	-0.0969931	-0.106328
P17568	NDUFB7	0					-0.0482922	-0.143029	-0.0925725	-0.0946311	-0.187107	-0.0975	-0.181074	-0.155227
Q9NZ01	TECR	3	+				-0.153936	-0.224294	-0.0383225	-0.138851	-0.249769	-0.176427	-0.140915	-0.189037
Q9Y5L4	TIMM13	0					-0.0822342	-0.161526	-0.0943402	-0.1127	-0.270781	-0.284927	-0.225625	-0.260444
P49427	CDC34	0					-0.358292	0.214249	-0.294702	-0.146248	0.0013472	-0.034553	-0.250478	-0.0945612
Q8IVT2	MISP	0					0.166413	0.0393165	0.169019	0.124916	0.0258107	0.0193559	0.125991	0.0570525
P19388	POLR2E	0					-0.064971	-0.00219617	-0.0128365	-0.0266679	-0.0336774	-0.0368636	-0.0957467	-0.0554292
O95721	SNAP29	0					-0.18427	-0.105067	0.0762394	-0.0710325	-0.130235	-0.0803398	0.108864	-0.0339038
Q9BXI6	TBC1D10A	0					0.0720956	1.24312	0.0780483	0.464422	0.269428	0.130858	0.243444	0.214577
Q15459	SF3A1	0					0.0521506	-0.0270244	0.0722861	0.0324707	-0.0389292	-0.05065	0.0416321	-0.0159824
P53007	SLC25A1	6					-0.135915	-0.292383	-0.0862228	-0.171507	-0.405973	-0.317379	-0.209007	-0.310786
Q96GD0	PDXP	0					-0.3505	0.285229	0.0411491	-0.00804036	1.28081	0.00125458	-0.0759113	0.40205
P09382	LGALS1	0					-0.129501	-0.00580611	0.0173703	-0.0393122	-0.194999	-0.112527	-0.0757849	-0.12777
Q8N3F8	MICALL1	0					0.551613	0.193447	0.293844	0.346301	0.174152	0.0358296	0.0326093	0.0808635
Q9NSP4	CENPM	0					0.002346	0.0361315	-0.136426	-0.0326495	0.128377	0.110499	0.231537	0.156804
Q8IWL3	HSCB	0					0.597198	0.681961	0.424712	0.567957	0.196289	0.212707	0.288607	0.232534
Q9NS69	TOMM22	1					0.111693	-0.106509	0.0189331	0.00803894	-0.050576	-0.134651	-0.037092	-0.0741063
Q9Y3I0	RTCB	0					-0.057219	0.00881841	-0.0193984	-0.0225997	-0.0243389	0.0374015	0.0194499	0.0108375
O00178	GTPBP1	0					-0.223547	-0.0155594	-0.079845	-0.106317	-0.0379205	-0.0376782	0.00908863	-0.0221701
Q9BU23	LMF2	11	+				0.274401	0.0992679	0.256988	0.210219	0.0839008	0.0244483	0.0485053	0.0522848
P09601	HMOX1	0	+				0.25791	0.151156	0.355642	0.254903	0.00560365	-0.0234926	0.189709	0.0572734
Q9BPW8	NIPSNAP1	0					0.0176889	-0.103022	-0.00673981	-0.030691	-0.13241	-0.123184	-0.0584886	-0.104694
P33992	MCM5	0					-0.0450013	-0.0549217	-0.0370864	-0.0456698	-0.128721	-0.145776	-0.0997311	-0.124742
Q14166	TTLL12	0					-0.233551	0.16512	-0.0949182	-0.0544496	-0.0616334	0.0828934	-0.00492141	0.00544619
Q15750	TAB1	0					-0.0918343	-0.0286731	-0.121767	-0.080758	0.30981	-0.282065	0.209247	0.0789971
P35579	MYH9	0					0.194706	0.288778	0.231279	0.238254	0.291568	0.342202	0.328823	0.320864
P50502	ST13	0					-0.395835	-0.113457	-0.285728	-0.265007	-0.298751	-0.223248	-0.366015	-0.296005
P62877	RBX1	0					-0.191165	-0.030573	-0.0810126	-0.100917	-0.00485937	0.012594	-0.0489895	-0.0137516
Q969R5	L3MBTL2	0					0.0916957	-0.172121	-0.1027	-0.0610417	0.0886285	0.08105	-0.132067	0.0125372
Q7RTV0	PHF5A	0					-0.0101611	-0.0338602	-0.0111872	-0.0184028	-0.0530738	-0.028692	0.000133108	-0.0272109
Q99798	ACO2	0					-0.015273	-0.153528	-0.0208695	-0.0632234	-0.104842	-0.156065	-0.0266661	-0.095858
P51003	PAPOLA	0					-0.259632	0.151587	-0.268465	-0.125503	-0.200958	-0.0837619	-0.178486	-0.154402
P07900	HSP90AA1	0					-0.13025	0.19098	0.00467139	0.0218003	0.0504819	0.134891	0.00975926	0.065044
P27448	MARK3	0	+				0.43698	-0.498426	-0.0726728	-0.0447061	-0.584962	-0.670476	-0.0412415	-0.432227
Q9Y5B9	SUPT16H	0					0.0782694	-0.105788	-0.0148065	-0.0141084	-0.0391308	-0.0399838	-0.0426651	-0.0405932
Q96EK6	GNPNAT1	0					-0.286595	-0.0227038	-0.29861	-0.202636	0.00653959	0.0155485	-0.122552	-0.0334881
Q6PL24	TMED8	0					0.199543	0.317007	-0.0407582	0.158598	0.51844	0.0762976	-0.11642	0.159439
O95433	AHSA1	0					-0.134207	0.271135	-0.0651864	0.0239137	0.0800639	0.156344	-0.00346014	0.0776493
O15270	SPTLC2	1	+				0.166413	0.0457077	0.234482	0.148868	0.0718764	0.0741839	0.110014	0.085358
P11586	MTHFD1	0	+				-0.148765	0.132612	-0.0894816	-0.0352114	0.100017	0.169039	0.00774864	0.092268
Q99986	VRK1	0					0.0572635	-0.229155	0.0458143	-0.0420257	-0.112143	-0.0639061	-0.101843	-0.0926308
Q16822	PCK2	0				+	0.772003	0.498338	0.744777	0.671706	0.872758	0.916922	1.09371	0.961131
Q9UL46	PSME2	0					-0.244079	0.199476	-0.141176	-0.0619263	0.0377747	0.19074	0	0.0761714
Q9H307	PNN	0					0.247715	-0.059023	0.0921987	0.0936302	0.0691575	-0.0188246	0.0201252	0.023486
Q9UNZ2	NSFL1C	0					-0.0776879	0.126248	0.0506186	0.0330596	0.111048	0.189627	0.0179651	0.106213
P48637	GSS	0					0.0571415	0.361726	0.00269451	0.140521	0.190487	0.294073	0.0925765	0.192379
P11216	PYGB	0					-0.017359	0.362208	0.15345	0.1661	0.366496	0.384717	0.303608	0.351607
Q05048	CSTF1	0					0.0960738	-0.120847	0.0155321	-0.00308054	-0.111664	-0.0448541	0.0113699	-0.0483827
Q9BQL6	FERMT1	0					-0.0513493	0.159998	0.256394	0.121681	0.0680714	0.115683	0.029614	0.0711227
Q92544	TM9SF4	9	+				0.0753027	0.0162518	0.139728	0.077094	-0.00692229	0.0754458	0.157446	0.0753234
Q9H444	CHMP4B	0					-0.25571	0.0714241	-0.235042	-0.139776	-0.129857	-0.0736034	-0.168562	-0.124008
P23526	AHCY	0					-0.318619	0.0212289	-0.274573	-0.190655	-0.0653995	-0.0341448	-0.164289	-0.0879443
Q9HDC9	APMAP	1	+				0.134798	0.0666772	0.101201	0.100892	0.0542408	0.0985309	0.183916	0.112229
P51553	IDH3G	0					0.148894	-0.0284196	0.14406	0.088178	0.0061235	0.0285637	0.0780174	0.0375682
O00264	PGRMC1	1	+				-0.00619865	-0.117634	0.00920245	-0.0382099	-0.11013	-0.0611044	0.0248619	-0.0487907
P33897	ABCD1	5	+				-0.109216	-0.0929962	-0.0326512	-0.0782877	-0.0924619	-0.127909	-0.0314975	-0.0839561
O75695	RP2	0					0.185346	0.095119	0.116659	0.132375	0.0294001	0.0517422	0.331922	0.137688
P01033	TIMP1	0	+				0.252315	0.244746	0.248856	0.248639	0.533307	0.416552	0.545392	0.498417
P06280	GLA	0	+				0.475247	0.0995449	0.0864528	0.220415	-0.0847675	-0.199664	-0.221974	-0.168802
P78549	NTHL1	0					-0.0338247	-0.446813	-0.216612	-0.232417	-0.383363	-0.449761	-0.28981	-0.374311
Q9Y5N6	ORC6	0					-0.230157	-0.123698	-0.315105	-0.222987	-0.179262	-0.208975	-0.543696	-0.310644
Q9Y2Y0	ARL2BP	0					-0.133353	0.0700662	-0.0913014	-0.0515293	0.0851087	0.432634	-0.196039	0.107235
Q02127	DHODH	1					-0.10889	-0.253869	-0.167719	-0.176826	-0.224551	-0.397939	-0.159286	-0.260592
P19387	POLR2C	0					-0.052367	-0.0117173	0.0416256	-0.00748622	-0.129857	-0.0976301	0.0011996	-0.0754291
P51511	MMP15	1	+				-0.341925	0.140713	-0.340243	-0.180485	-0.498755	-0.364241	-0.376317	-0.413104
Q13232	NME3	0					0.11842	0.0592492	0.03069	0.0694531	0.0138408	-0.0960669	0.0258111	-0.018805
P51665	PSMD7	0					-0.0196732	0.0755053	0.0413433	0.0323918	0.121263	0.0811827	0.0850665	0.0958373
Q8NCC3	PLA2G15	0	+				-0.809647	-0.633981	-0.195491	-0.546373	-0.447273	-0.178891	-0.558156	-0.394773
Q3SXM5	HSDL1	0					-0.0503312	-0.13021	-0.0209539	-0.067165	-0.307146	-0.0991919	-0.16179	-0.189376
Q14694	USP10	0					-0.156988	-0.116799	-0.0702251	-0.114671	-0.110897	-0.110593	-0.108779	-0.11009
Q9BQD7	FAM173A	1	+				0.147335	-0.137633	0.108836	0.0395127	-0.156119	-0.125101	-0.124387	-0.135202
Q9UNE7	STUB1	0					-0.188801	0.0330857	-0.123058	-0.0929246	0.048981	-0.000139227	-0.0498907	-0.000349639
Q1ED39	KNOP1	0					0.227814	-0.0717492	-0.00446823	0.050532	0.104018	0.00209134	0.0112354	0.039115
Q9H223	EHD4	0					-0.0342826	0.138577	-0.0417747	0.0208399	0.0383063	0.0441374	-0.0111488	0.023765
Q9NVM6	DNAJC17	0					-0.0800183	0.133746	-0.0600639	-0.00211199	-0.140513	0.0255825	0.0398503	-0.0250268
Q9P253	VPS18	0					-0.076688	0.0811014	-0.0493336	-0.0149734	0.116764	-0.00875065	-0.0325399	0.0251578
O43482	OIP5	0					-0.336644	-0.200751	-0.108389	-0.215261	-0.297066	-0.194194	-0.414704	-0.301988
Q9UKV8	AGO2	0					0.0195885	0.207739	0.0195933	0.082307	0.128264	0.0168165	0.0243198	0.0564667
O43353	RIPK2	0					-0.396904	0.0761863	-0.135334	-0.152017	0.160312	0.312797	-0.0735076	0.133201
Q8TB36	GDAP1	2					-0.27879	-0.252568	-0.113232	-0.214863	-0.256026	-0.475641	-0.387767	-0.373145
P60228	EIF3E	0					-0.15562	-0.0470596	-0.0812558	-0.0946452	-0.134676	-0.0733385	-0.160836	-0.12295
Q15006	EMC2	0					-0.000820246	-0.145719	-0.0209202	-0.0558198	-1.91033	-1.89786	-1.90916	-1.90578
Q9NRG0	CHRAC1	0					-0.104318	0.12653	-0.0455507	-0.00777934	0.0521989	-0.0206113	-0.0956221	-0.0213448
O95071	UBR5	0					0.0443941	-0.0220674	0.0673012	0.029876	-0.00527229	-0.031012	0.0937135	0.0191431
P00390	GSR	0					-0.124994	0.0889179	-0.105061	-0.0470456	0.0580094	0.145362	0.0594323	0.0876012
P62714	PPP2CB	0					-0.0741295	0.175727	-0.0345274	0.0223567	0.0425668	0.141561	-0.0172177	0.0556367
Q9NQT4	EXOSC5	0					0.0718492	-0.159328	0.0269641	-0.0201715	-0.217442	-0.0921512	-0.123531	-0.144375
Q8N7H5	PAF1	0					-0.0226761	-0.00541971	0.102636	0.0248469	-0.0438604	0.0102066	0.0249976	-0.00288542
O75792	RNASEH2A	0					-0.127142	-0.0885044	-0.241525	-0.15239	-0.110609	-0.0185494	-0.170103	-0.0997537
Q15428	SF3A2	0					0.0739449	0.0413107	0.0817635	0.065673	-0.0131959	-0.0284188	-0.00624866	-0.0159545
Q9NXH9	TRMT1	0					-0.270166	-0.0373919	-0.216775	-0.174778	-0.179445	-0.085995	-0.240813	-0.168751
O43765	SGTA	0					-0.372123	-0.190251	-0.306812	-0.289729	-0.334755	-0.258499	-0.305635	-0.29963
Q99426	TBCB	0					-0.230757	0.16808	-0.119717	-0.0607977	0	0.0696882	-0.0836016	-0.00463779
P36954	POLR2I	0					0.494157	-0.825981	-0.34065	-0.224158	-0.108209	0.0187914	0.161613	0.0240652
Q9Y3X0	CCDC9	0					0.127354	0.188061	0.100429	0.138615	0.310837	0.119598	-0.0666539	0.121261
O60664	PLIN3	0					-0.078687	0.369071	0.0913581	0.127247	0.254526	0.328719	0.167841	0.250362
Q16543	CDC37	0					-0.0498783	0.186898	0.0896604	0.07556	0.106581	0.160698	0.0491945	0.105491
O00115	DNASE2	0	+				-0.586329	-0.553551	-0.459134	-0.533005	-0.521877	-0.440858	-0.466054	-0.476263
P07942	LAMB1	0	+				0.00175917	-0.377248	-0.0864972	-0.153995	-0.125496	-0.259198	-0.187874	-0.190856
Q9UI42	CPA4	0	+				0.293523	-0.0427988	0.232144	0.160956	0.125437	0.224038	0.289046	0.21284
A4D1E9	GTPBP10	0					-0.0870973	-0.133396	-0.0486873	-0.0897268	-0.146794	-0.185767	-0.114083	-0.148881
O15155	BET1	1	+				-0.02406	-0.051308	0.0642147	-0.0037178	0.0812687	0.298333	0.0792836	0.152962
P43490	NAMPT	0					-0.027859	0.372615	0.0936432	0.146133	0.351883	0.445934	0.214447	0.337421
Q3B726	TWISTNB	0					0.139826	-0.0617506	-0.0380554	0.01334	-0.00723139	0.0963844	0.309392	0.132848
Q02218	OGDH	0					0.102351	0.0110313	0.170407	0.0945966	0.0318333	0.0585454	0.136527	0.0756353
P51636	CAV2	0	+				0.524823	0.230691	0.819001	0.524838	0.302511	0.129821	0.377011	0.269781
Q9NWM8	FKBP14	0	+				-0.0101611	-0.156315	0.00846059	-0.0526718	0.0756915	-0.047418	0.138858	0.0557104
Q13442	PDAP1	0					0.220421	0.0967771	-0.0386063	0.0928638	0.309682	0.165644	0.115835	0.197053
Q9Y5X2	SNX8	0					-0.296649	-0.393382	-0.301257	-0.330429	-0.395697	-0.559994	-0.469715	-0.475135
O00401	WASL	0					-0.0611563	-0.106749	-0.148681	-0.105529	-0.00826158	0.0800778	0.00748056	0.0264323
Q13155	AIMP2	0					-0.147178	-0.125358	-0.112677	-0.128404	-0.0997289	-0.0849445	-0.121695	-0.102123
Q9NW13	RBM28	0					0.161554	-0.0397834	0.0655596	0.0624435	0.0521989	-0.0494388	0.0367035	0.0131545
O60568	PLOD3	0	+				-0.0502179	-0.131509	0.0292195	-0.0508357	-0.157698	-0.0688293	-0.0282347	-0.0849208
Q9Y3D6	FIS1	1					0.0154363	-0.099527	0.0460267	-0.012688	-0.115971	-0.124974	-0.126829	-0.122591
Q15910	EZH2	0					0.183083	0.0029767	0.199016	0.128358	0.107138	-0.00278364	0.0690442	0.0577997
Q9BYC8	MRPL32	0					0.215513	-0.100733	0.0594182	0.058066	0.0382	-0.0433677	-0.0633423	-0.0228367
Q9BQE9	BCL7B	0					0.135571	-0.220637	0.191007	0.0353138	0.0517695	-0.193829	0.199988	0.0193096
O15498	YKT6	0					-0.0230223	0.370307	-0.015977	0.110436	0.240999	0.276585	0.0778766	0.198487
Q9NZZ3	CHMP5	0					-0.232354	0.132895	-0.038239	-0.0458992	0.0728563	0.111086	0.029206	0.0710494
P60468	SEC61B	1	+				0.137117	0.0765954	0.243264	0.152325	0.142483	0.0676571	0.294167	0.168102
Q12926	ELAVL2	0					-0.330692	-0.275606	-0.624297	-0.410199	-0.187652	-0.428696	-0.436331	-0.350893
O60869	EDF1	0					-0.184992	-0.111783	-0.129091	-0.141955	-0.198343	-0.117416	-0.11396	-0.143239
Q7Z333	SETX	0					0.0105874	-0.150619	-0.0561607	-0.0653975	0.0199183	-0.0741329	0.115026	0.0202706
Q5JRX3	PITRM1	0					0.468761	0.251748	0.382034	0.367514	0.347923	0.385717	0.471169	0.401603
Q9UKB3	DNAJC12	0				+	0.965969	1.16133	1.08396	1.07042	1.14638	1.09228	1.26283	1.16716
P30405	PPIF	0					0.276245	0.151299	0.228323	0.218622	0.157191	0.126015	0.304398	0.195868
Q9H6R0	DHX33	0					-0.0568811	-0.0729789	0.0226729	-0.035729	-0.0398362	-0.0795487	-0.0215558	-0.0469803
Q9Y5J1	UTP18	0					0.185346	-0.116918	0.0079433	0.0254571	0.0866476	-0.0334644	0.0580444	0.0370759
Q7Z417	NUFIP2	0					-0.0364556	-0.052929	-0.0176719	-0.0356855	-0.0658943	-0.0341448	-0.0653811	-0.0551401
O14907	TAX1BP3	0					-0.181379	0.245956	0.0181514	0.0275764	0.0725296	0.154808	0.0856319	0.104323
Q9NVS9	PNPO	0					-0.19137	0.272915	-0.0899811	-0.00281215	0.130756	0.133026	-0.0569525	0.0689432
P07737	PFN1	0					-0.164432	0.264085	-0.0482561	0.0171322	0.0865376	0.173384	0.0482298	0.102717
Q07021	C1QBP	0					0.106509	-0.0221947	0.0619397	0.0487515	-0.0810516	-0.115359	0.0282548	-0.056052
O75976	CPD	1	+				-0.0306153	-0.142092	-0.0586488	-0.0771186	-0.244708	-0.274253	-0.132675	-0.217212
Q9Y3C7	MED31	0					-0.241008	-0.200751	-0.340243	-0.260668	-0.353439	-0.157065	-0.122797	-0.2111
P55039	DRG2	0					-0.146013	0.314481	-0.0863358	0.0273774	0.0680714	0.273516	-0.0394276	0.10072
Q92925	SMARCD2	0					0.0983306	-0.012102	0.152782	0.0796703	0.0885185	0.0406937	0.0888874	0.0726999
P17844	DDX5	0					0.0250642	-0.133632	-0.0550223	-0.0545299	-0.154631	-0.216189	-0.131459	-0.167426
Q92830	KAT2A	0					0.3809	0.0886432	-0.0913176	0.126075	-0.118358	1.74008	-0.284568	0.445718
Q96AG4	LRRC59	1	+				0.316138	0.00998952	0.121147	0.149091	0.195696	0.0631959	0.161405	0.140099
P51452	DUSP3	0					-0.146331	0.384161	0.109409	0.115746	-0.0363057	0.265974	0.0244552	0.084708
Q9HD47	RANGRF	0					-0.0855518	0.229144	-0.13349	0.00336723	-0.0153495	-0.0277357	0.0181001	-0.00832834
Q13829	TNFAIP1	0					0.238836	0.146712	0.191595	0.192381	0.154883	0.303551	0.331503	0.263312
Q9UHA4	LAMTOR3	0					0.197795	-0.0939657	0.110149	0.0713259	-0.226057	1.12069	0.0405352	0.311722
P53634	CTSC	0	+				-0.300461	-0.531896	-0.513475	-0.448611	-0.788141	-0.837588	-0.771822	-0.799184
O75312	ZPR1	0					-0.267929	0.178021	-0.089691	-0.0598662	0.115417	0.198776	0.11419	0.142794
Q15637	SF1	0					0.0700027	-0.0416686	0.0652368	0.0311903	0.0457703	0.0801808	0.0191799	0.048377
Q9H6F5	CCDC86	0					0.320815	0.0241182	0.15945	0.168128	0.0747094	-0.0225328	0.0300222	0.0273996
Q9UMS4	PRPF19	0					0.137632	-0.00413117	0.0517203	0.0617405	0.0208637	-0.0306028	0.0372502	0.00917036
O00330	PDHX	0					-0.0119058	-0.0813124	0.0128654	-0.0267843	-0.140983	-0.110205	0.00480441	-0.0821279
O00193	C11orf58	0					-0.168088	0.0341444	-0.261044	-0.131662	0.0217045	-0.0315573	-0.154865	-0.0549059
P16989	YBX3	0					0.0162657	-0.018115	0.0293769	0.00917587	0.051233	-0.0304664	-0.0852353	-0.0214896
Q15020	SART3	0					0.16103	-0.0135115	0.183219	0.110246	0.0565008	0.0388319	0.070023	0.0551186
Q9NW08	POLR3B	0					-0.113447	-0.0127428	-0.0132105	-0.0464669	-0.120551	-0.0596346	-0.110261	-0.0968157
Q86W92	PPFIBP1	0					0.131328	0.110111	0.192182	0.14454	0.0748185	0.194673	0.143766	0.137752
Q14165	MLEC	1	+				0.199813	0.103845	0.210794	0.171484	0.0746004	0.149683	0.16829	0.130858
P09960	LTA4H	0					-0.304263	0.196436	-0.131363	-0.0797299	-0.0637159	0.109357	-0.0942498	-0.016203
O15145	ARPC3	0					-0.0724586	0.0994064	0.125087	0.0506782	0.255391	0.31207	0.0763306	0.214597
Q9UHW5	GPN3	0					-0.190754	-0.0754349	0.0518979	-0.0714303	0.09802	0.0451432	-0.0462826	0.0322936
Q9Y6K5	OAS3	0					0.0808704	0.235066	0.143757	0.153231	0.22784	0.211852	0.124858	0.188183
P57740	NUP107	0					-0.0641864	-0.148288	-0.0740417	-0.0955053	-0.117499	-0.167523	-0.132432	-0.139152
Q9UNS1	TIMELESS	0					-0.297126	-0.369864	-0.41622	-0.36107	-0.365226	-0.28069	-0.368288	-0.338068
Q13601	KRR1	0					0.213337	0.0328211	0.130914	0.125691	0.0290831	-0.0102731	0.072823	0.0305443
Q8WUD6	CHPT1	8	+				0.0628841	0.205949	-0.115655	0.0510592	0.0433135	0.207469	0.221917	0.157567
Q8NFW8	CMAS	0					0.282932	0.153167	0.319461	0.251853	0.306348	0.339661	0.267379	0.304463
Q15286	RAB35	0					0.0958232	-0.0382735	0.0951444	0.0508981	-0.0996321	-0.0397127	0.0304302	-0.0363049
Q13242	SRSF9	0					0.0517861	-0.0805791	-0.0159433	-0.0149121	-0.115015	-0.0982811	-0.0412415	-0.0848459
P48506	GCLC	0					-0.130143	0.31289	0.0949612	0.0925694	0.259228	0.38918	0.151589	0.266666
P23511	NFYA	0					-0.0900736	-0.137868	-0.156871	-0.128271	-0.400648	-0.115616	-0.0921265	-0.202797
Q9Y294	ASF1A	0					-0.597992	-0.120372	0.0300946	-0.229423	-0.225083	-0.0783618	-0.219229	-0.174225
Q9NQE9	HINT3	0					0.274968	0.257022	0.186571	0.239521	0.247255	0.260974	0.243097	0.250442
Q8NI08	NCOA7	0					-0.0242906	0.433435	0.297316	0.235487	0.289541	0.301952	0.270461	0.287318
Q16539	MAPK14	0					-0.254138	0.319974	-0.0945169	-0.00956046	0.136323	0.123508	-0.0363128	0.0745063
Q15208	STK38	0					-0.0949104	0.149004	0.0545485	0.036214	-0.0156569	0.0509481	-0.00823719	0.00901802
P25205	MCM3	0					-0.110628	-0.0983199	-0.0906253	-0.0998576	-0.148104	-0.118058	-0.121205	-0.129122
Q9NPJ3	ACOT13	0					0.0755498	0.0119435	0.0832522	0.0569152	0.0567163	0.069922	0.114623	0.0804203
P25398	RPS12	0					-0.0984179	-0.0729789	-0.0894495	-0.0869488	-0.0836928	-0.0669684	-0.0809588	-0.0772067
O60493	SNX3	0					-0.0834516	0.130771	-0.0531232	-0.00193476	0.00737226	0.122765	-0.00850211	0.040545
O95684	FGFR1OP	0					-0.0794639	0.05602	-0.128668	-0.050704	-0.141077	-0.0212977	0.0636034	-0.0329237
Q13895	BYSL	0					0.101597	-0.0733475	-0.0418579	-0.00453626	-0.00681921	-0.0578958	-0.008767	-0.024494
O43598	DNPH1	0					-0.175475	0.29557	-0.111281	0.002938	0.182237	0.239613	0.0478165	0.156556
Q96KP1	EXOC2	0					0.00822788	0.0611365	0.078537	0.0493005	0.102794	0.138092	-0.0894993	0.0504623
Q9NV96	TMEM30A	2	+				0.312669	0.234275	0.277811	0.274919	0.133594	0.0162528	-0.0191913	0.0435519
P42285	SKIV2L2	0					0.0354774	-0.100854	-0.024431	-0.0299358	-0.105805	-0.146531	-0.0745202	-0.108952
P49590	HARS2	0					-0.0831196	-0.291222	-0.0689017	-0.147748	-0.112431	-0.0367277	-0.0172177	-0.0554587
P51397	DAP	0					0.0997114	0.532638	0.248672	0.293674	0.550056	0.536109	0.542906	0.543024
Q9NWX6	THG1L	0					-0.0428412	0.0103801	-0.0212076	-0.0178896	0.122954	-0.100232	0.0468527	0.0231914
O75694	NUP155	0	+				0.0102332	-0.0949343	-0.0393907	-0.0413639	-0.12891	-0.0995821	-0.0795725	-0.102688
Q8NC54	C5orf15	1	+				-0.274921	-0.205132	0.212601	-0.0891505	-0.419432	-0.106457	0.0959901	-0.1433
A5PLN9	TRAPPC13	0					-0.159088	0.00738817	0.148899	-0.00093371	0.17135	0.114581	0.691802	0.325911
P54136	RARS	0					-0.08511	0.0243812	-0.0400579	-0.0335956	0.00414879	0.0210515	0.031247	0.0188158
P40692	MLH1	0					-0.213878	-0.134574	-0.218618	-0.189023	-0.234884	-0.108914	-0.139585	-0.161128
Q96A26	FAM162A	1					-0.0341681	-0.0565388	0.0517023	-0.0130015	-0.0846698	-0.0577619	-0.0198484	-0.0540933
P11172	UMPS	0					-0.223648	0.148717	-0.150011	-0.0749805	0.0170859	0.0735388	-0.0966194	-0.00199822
O43818	RRP9	0					0.208454	-0.0844862	0.11139	0.0784524	0.00238412	-0.0761167	0.0049381	-0.0229315
P30414	NKTR	0					0.131585	-0.106629	0.0469829	0.0239796	0.0082053	-0.17433	-0.117649	-0.0945911
Q8IWB7	WDFY1	0					0.031998	-0.0906914	-0.136083	-0.0649254	-0.228357	-0.149423	-0.0429238	-0.140235
P31327	CPS1	0					0.133384	-0.0882611	0.0449825	0.0300351	0.116427	0.0663435	0.165418	0.116063
Q9P2D3	HEATR5B	0					-0.15562	0.0133782	-0.110979	-0.0844071	-0.376678	0.129166	-0.14562	-0.131044
P40925	MDH1	0					-0.263933	0.155469	-0.186268	-0.0982437	0.036287	0.0940927	-0.121205	0.00305809
P63313	TMSB10	0					-1.39824	0.226721	0.0517203	-0.373265	-0.23374	0.177586	0.136059	0.0266348
P43246	MSH2	0					-0.223347	-0.153063	-0.19911	-0.19184	-0.236556	-0.112913	-0.201727	-0.183732
Q8NG68	TTL	0					0.196182	0.18095	-0.143786	0.0777821	0.679954	0.0850641	0.0376606	0.26756
Q9Y3B4	SF3B6	0					-0.0439786	-0.0695333	0.0586501	-0.0182873	-0.0739849	-0.0721464	-0.0334515	-0.0598609
Q9UI10	EIF2B4	0					-0.000468729	-0.010691	-0.110249	-0.0404695	0.0558547	0.0511357	-0.104696	0.000764773
Q96HR9	REEP6	2	+				-0.160872	0.0414438	0.176421	0.0189976	-0.525047	-0.324183	-0.27502	-0.37475
Q9BSM1	PCGF1	0					0.830098	-0.0760483	0.19756	0.317203	0.0103943	-0.38199	0.184279	-0.062439
P38435	GGCX	5	+				-0.160557	-0.356596	-0.154578	-0.22391	-0.261221	-0.299377	-0.129633	-0.230077
P61604	HSPE1	0					0.073575	-0.00606359	0.0658467	0.0444527	-0.0768354	-0.0355049	0.0443774	-0.0226543
Q9H8Y8	GORASP2	0					0.183615	0.214234	0.21012	0.202656	0.288403	0.330084	0.336659	0.318382
Q03701	CEBPZ	0					0.184947	-0.019136	0.0643042	0.076705	-0.0220968	-0.0684307	-0.00239624	-0.0309746
P43007	SLC1A4	9	+				-0.214282	-0.493843	-0.656635	-0.45492	-0.383522	-0.327962	-0.272155	-0.327879
Q13416	ORC2	0					-0.0872079	-0.0489354	0.0247298	-0.0371378	-0.172477	0.160667	-0.10296	-0.0382568
P52701	MSH6	0					-0.297698	-0.11811	-0.243844	-0.219884	-0.21557	-0.138326	-0.245766	-0.199888
P35270	SPR	0					-0.12682	0.218665	0.0755707	0.0558054	0.109148	0.173416	0.0311109	0.104558
P06733	ENO1	0					-0.189315	0.24222	-0.0784328	-0.00850933	0.130983	0.188007	0.0443774	0.121123
P49591	SARS	0					0.164967	0.59421	0.318755	0.359311	0.496167	0.52984	0.458115	0.494707
Q9BQA1	WDR77	0					-0.11637	0.0891931	-0.0483556	-0.0251774	0.00497992	0.137908	0.00788241	0.0502567
Q9UGM6	WARS2	0					-0.0852205	0.197177	0.21672	0.109559	0.13826	-0.0364562	0.157937	0.0865802
Q99848	EBNA1BP2	0					0.407501	0.0835653	0.199823	0.230296	0.232213	0.122598	0.143413	0.166075
O60779	SLC19A2	12	+				0.13931	0.202612	0.41188	0.251267	0.0518769	0.378364	0.32802	0.252754
O95926	SYF2	0					-0.241504	0.258831	-0.380314	-0.120996	-0.113484	-0.237145	0.183311	-0.0557727
Q8WVM7	STAG1	0					0.111439	-0.0249929	0.0958588	0.0607683	0.0409676	0.0255825	0.0969874	0.0545125
P31939	ATIC	0					-0.281011	0.25676	-0.110503	-0.044918	-0.0229126	0.090973	-0.0281042	0.0133187
Q8TB52	FBXO30	0					-0.406043	0.154893	-0.122035	-0.124395	0.00414879	0.278138	-0.177426	0.0349535
Q9H204	MED28	0					-0.00140578	-0.0726101	0.10708	0.0110214	-0.232154	0.0946428	0.0566581	-0.026951
Q9H6V9	LDAH	0	+				0.104366	-0.140333	0.0943754	0.0194693	0.0683972	-0.0325112	-0.117034	-0.0270494
Q9Y2T3	GDA	0					-0.301127	0.211896	-0.0104044	-0.0332118	0.0389446	0.0752991	0.023507	0.0459169
Q9UKF6	CPSF3	0					0.0278098	-0.0587748	0.0962437	0.0217596	-0.0105253	-0.0303301	0.0430041	0.000716243
Q5T1M5	FKBP15	0					-0.0471584	0.0670836	0.0556531	0.0251928	0.12917	0.117888	0.199009	0.148689
O75351	VPS4B	0					-0.0802401	0.180554	-0.132912	-0.0108659	-0.0592499	0.0647835	-0.139222	-0.044563
Q8TD19	NEK9	0					-0.252368	0.195622	-0.0791147	-0.0452872	0.111719	0.103148	-0.0383901	0.0588256
Q9H1B7	IRF2BPL	0					-0.232853	0.2632	-0.0994545	-0.0230358	-0.243746	0.015971	-0.0595118	-0.0957623
Q9GZT3	SLIRP	0					-0.0316478	-0.136457	-0.0122927	-0.0601325	-0.154259	-0.167648	-0.0905007	-0.137469
Q9BWT3	PAPOLG	0	+				0.130173	0.0583066	-0.195401	-0.00230694	-0.103301	-0.287555	-0.166783	-0.185879
Q8NCA5	FAM98A	0					0.138664	0.149864	0.168864	0.152464	0.120249	0.129775	0.24297	0.164332
Q6ULP2	AFTPH	0					-0.389049	0.0532002	-0.149377	-0.161742	0.0235984	-0.0402548	0.010967	-0.00189649
Q3ZCW2	LGALSL	0					-0.309947	0.346276	0.0535517	0.0299604	0.321281	0.238446	0.131775	0.230501
Q9P021	CRIPT	0					-0.287363	-0.0679307	-0.199125	-0.184806	-0.204648	-3.03663	-0.0923764	-1.11122
Q9NRZ9	HELLS	0					-0.139324	-0.142794	-0.0519988	-0.111373	-0.133733	-0.210541	-0.174005	-0.17276
Q12981	BNIP1	1	+				-0.0782432	0.0620809	0.0570081	0.0136153	-0.0684645	0.0130157	0.157164	0.0339051
Q9H999	PANK3	0					-0.12295	-0.143146	-0.116573	-0.127556	-0.495379	-0.399102	-0.443697	-0.446059
Q96RS6	NUDCD1	0					-0.144211	0.192427	-0.10581	-0.019198	0.0637351	0.125103	0.0241842	0.0710074
Q9Y673	ALG5	1	+				0.349708	0.0742795	0.311077	0.245022	0.0302458	0.199768	0.159543	0.129852
Q15043	SLC39A14	6	+				0.294098	0.348118	0.312013	0.318077	0.288782	0.422441	0.249735	0.320319
Q8IZV5	RDH10	1	+				-0.0503312	-0.167639	-0.0261832	-0.0813845	-0.0388284	-0.0106881	-0.21797	-0.0891621
P38432	COIL	0					0.194304	-0.0144078	0.146468	0.108788	0.0855483	-0.0590999	0.0610992	0.0291826
Q15003	NCAPH	0					-0.16767	-0.0186256	-0.15447	-0.113589	-0.0744769	-0.0401194	-0.0798246	-0.064807
Q9BWT6	MND1	0					-0.183651	-0.0124865	-0.266471	-0.154203	0.0196033	-0.415908	0.197755	-0.0661832
Q8TB69	ZNF519	0					-0.242792	-0.0376438	-0.250561	-0.176999	-0.0891554	-0.0104115	0.0676472	-0.0106399
Q8WU10	PYROXD1	0					-0.139856	0.163932	-0.0597185	-0.0118809	0.00446052	0.0970697	-0.0747732	0.00891902
P04040	CAT	0					0.0845942	-0.0300666	0.0911206	0.0485494	0.0218096	0.0106278	0.109582	0.0473399
P53621	COPA	0					-0.0149251	0.111228	0.08567	0.0606576	0.116988	0.230169	0.178764	0.175307
O95302	FKBP9	0	+				-0.168192	-0.215747	-0.16022	-0.181386	-0.0139142	-0.0759845	-0.048732	-0.0462102
P09496	CLTA	0					-0.012487	0.0442407	0.108725	0.0468261	0.088959	0.0839563	0.0719824	0.0816326
Q7Z2W4	ZC3HAV1	0					-0.0899634	-0.0762936	-0.097116	-0.087791	-0.0824218	-0.0472832	-0.0728744	-0.0675264
O00148	DDX39A	0					0.2113	-0.00116307	0.114542	0.108226	0.104686	-0.0329198	0.0424551	0.0380738
Q16512	PKN1	0					-0.229158	0.211582	-0.327729	-0.115102	0.210001	0.616172	0.119984	0.315386
Q9BQ61	C19orf43	0					0.00657845	0.126107	0.016104	0.0495965	0.00404503	0.095908	0.0731032	0.0576854
Q5T200	ZC3H13	0					0.19042	-0.0456825	0.0958039	0.0801804	0.175204	0.0189325	0.078158	0.0907647
Q07954	LRP1	1	+				0.0419788	-0.20255	0.0186724	-0.0472996	-0.118263	-0.0296478	-0.0707193	-0.0728767
P61619	SEC61A1	10	+				0.223976	0.091533	0.306002	0.20717	0.238186	0.286933	0.330849	0.285323
Q13287	NMI	0					0.084967	0.442385	0.36911	0.298821	0.44793	0.505447	0.459085	0.470821
P09012	SNRPA	0					0.0469345	-0.0574087	0.0205497	0.00335848	-0.0704386	-0.0845504	0.0162124	-0.0462589
Q96D53	COQ8B	1					0.150454	-0.0234673	0.10976	0.0789158	0.0196033	0.0132969	0.0270324	0.0199776
Q9H9F9	ACTR5	0					-0.0271689	0.128649	0.10756	0.0696801	-0.0182158	-0.00805809	-0.0641072	-0.030127
Q13247	SRSF6	0					0.223702	-0.0479354	0.106138	0.0939683	0.0955834	-0.026505	0.0395764	0.0362183
Q9UL26	RAB22A	0					0.162079	-0.0312057	-0.931872	-0.267	-0.213517	-0.128546	-0.125364	-0.155809
O95396	MOCS3	0					-0.182102	0.36269	0.0264924	0.0690268	0.0831326	0.218013	0.0231007	0.108082
Q9Y508	RNF114	0					-0.226656	0.0791882	-0.173766	-0.107078	-0.0258656	-0.0133134	-0.112235	-0.0504713
P12955	PEPD	0					-0.174749	0.245359	-0.0940993	-0.00782972	-0.0632203	0.0419841	-0.0386496	-0.0199619
Q96PE7	MCEE	0					1.28521	0.098714	0.991538	0.791822	0.242101	0.312953	0.319482	0.291512
O00566	MPHOSPH10	0					0.297551	0.00245846	0.167785	0.155932	0.160312	0.0447121	0.132681	0.112568
O95274	LYPD3	0	+				0.362264	0.122865	0.422412	0.302514	0.320246	0.301437	0.368867	0.330183
Q96EU6	RRP36	0					0.151365	-0.0362576	0.0626557	0.0592544	-0.0509759	-0.101401	0.049746	-0.0342104
P09234	SNRPC	0					0.161423	-0.0466842	0.0122774	0.0423388	-0.0280004	0.061843	0.0537509	0.0291978
Q5JTZ9	AARS2	0					0.129147	-0.051308	0.125423	0.0677543	0.0102899	0.0628614	0.14875	0.073967
Q9BQ90	KLHDC3	0					-0.0989652	-0.08009	-0.64495	-0.274668	-0.12036	-0.865002	-0.622747	-0.536036
P43307	SSR1	1	+				0.49604	0.179441	0.358783	0.344755	0.373322	0.34705	0.395417	0.371929
Q9P0I2	EMC3	2	+				-0.0626161	-0.136575	-0.0711559	-0.0901156	-2.02197	-1.94805	-1.77995	-1.91666
P00505	GOT2	0					0.204397	0.0684383	0.18952	0.154118	0.0956942	0.101368	0.175856	0.124306
Q9BZI7	UPF3B	0					0.149804	-0.0396576	-0.0388066	0.0237799	0.0895098	-0.178152	-0.0573367	-0.0486598
Q9Y2R9	MRPS7	0					0.068281	-0.0318381	0.0528224	0.0297551	-0.0804641	-0.107751	0.0869049	-0.03377
Q9BW27	NUP85	0					0.0159101	-0.0904486	-0.0652191	-0.0465858	-0.0994389	-0.165413	-0.0788158	-0.114556
Q9BUK6	MSTO1	0					0.123901	0.262331	0.093991	0.160075	0.0352253	0.478137	-0.0542603	0.153034
Q9BT30	ALKBH7	0					-0.194344	-0.4886	-0.382025	-0.35499	-0.295379	-0.22849	-0.383484	-0.302451
Q16740	CLPP	0					0.230974	0.0541396	0.198858	0.161324	0.113511	0.126699	0.212577	0.150929
P41273	TNFSF9	1					0.432133	0.410004	0.493146	0.445094	0.631032	0.706613	0.703688	0.680444
O95834	EML2	0					-0.00957909	0.4222	-0.0372201	0.125134	0.295757	0.258705	0.0548578	0.203107
P50552	VASP	0					0.0797551	0.214054	0.150668	0.148159	0.243203	0.23061	0.110014	0.194609
Q92797	SYMPK	0					0.110174	-0.0494353	0.0385404	0.0330929	-0.107344	-0.0862575	0.100269	-0.031111
Q92530	PSMF1	0					-0.316832	-0.0734705	-0.265188	-0.218497	-0.0852556	-0.14035	-0.527149	-0.250918
Q9H1E5	TMX4	1	+				-0.318525	-0.203112	-0.117901	-0.213179	0.367565	-0.0817885	0.0837951	0.123191
P60981	DSTN	0					-0.0253275	0.290754	0.0500683	0.105165	0.240509	0.280505	0.253065	0.258027
Q969V3	NCLN	1	+				0.23773	0.171091	0.259141	0.222654	0.160776	0.217835	0.259319	0.212643
Q9GZP4	PITHD1	0					-0.220432	-0.0243574	-0.249696	-0.164828	0.0635187	-0.0439085	-0.0149779	0.00154411
P06132	UROD	0					-0.189521	0.191526	-0.0877562	-0.0285837	0.0579015	0.0566314	0.137729	0.0840872
Q9BRP1	PDCD2L	0					-0.146331	-0.0127428	-0.0621184	-0.0737307	-0.207252	-0.0866511	-0.110755	-0.134886
Q9UBT2	UBA2	0					-0.22003	-0.0097924	-0.286291	-0.172037	0.0118555	0.000557632	-0.259522	-0.0823695
P10301	RRAS	0					0.101722	0.0058296	-0.0374874	0.0233548	-0.0621295	-0.184542	0.0408094	-0.0686206
Q9NZM5	NOP53	0					0.306771	-0.0732247	0.07937	0.104305	0.0865376	0.0258661	-0.0421477	0.0234187
Q9Y3A5	SBDS	0					-0.0736841	0.237701	0.00162982	0.0552156	0.201282	0.271228	0.070023	0.180844
Q12931	TRAP1	0					0.0048135	-0.110945	-0.0178073	-0.041313	-0.0754601	-0.0761167	-0.0153735	-0.0556501
Q8IWZ8	SUGP1	0					0.170101	0.00725813	0.246291	0.141217	-0.162888	0.0666792	0.0847839	-0.00380838
Q9Y6V7	DDX49	0					0.0274515	-0.0160708	-0.0862066	-0.024942	-0.0250515	-0.0416091	-0.0966194	-0.0544266
Q99470	SDF2	0	+				-0.0975419	-0.814118	-0.212519	-0.374726	-0.671909	-0.621781	-0.629997	-0.641229
Q9H0G5	NSRP1	0					0.304309	-0.0476852	-0.0527596	0.0679546	0.0266546	-0.0782297	0.00253366	-0.0163471
Q9BX95	SGPP1	9	+				-0.0675457	-0.464535	-0.309858	-0.280646	-0.150252	-0.170745	-0.0520773	-0.124358
A1L390	PLEKHG3	0					0.138664	-0.0854614	0.0826346	0.0452791	-0.0856461	-0.182333	-0.154506	-0.140828
Q9NRX4	PHPT1	0					-0.256495	0.027145	-0.222958	-0.150769	0.146605	0.099486	-0.226536	0.00651834
Q12933	TRAF2	0					-0.180448	0.0592492	-0.132662	-0.0846203	-0.0317538	0.0526377	-0.0609176	-0.0133445
O95619	YEATS4	0					-0.0900736	-0.0536767	-0.0657269	-0.0698257	0.023914	-0.0592335	-0.336669	-0.123996
O75182	SIN3B	0					0.0687729	0.0321599	0.219851	0.106928	-0.0917817	0.192267	0.0346549	0.0450467
Q9H910	JPT2	0					-0.0827877	0.169956	-0.104439	-0.00575705	0.051233	0.0811827	-0.0727477	0.0198894
Q8N490	PNKD	0					0.192963	-0.140685	0.705382	0.252553	0.244553	-0.485924	-0.0169543	-0.0861086
P04792	HSPB1	0					-0.172878	0.292891	0.0377483	0.052587	0.0061235	0.164144	0.00240026	0.057556
Q05209	PTPN12	0					-0.0105103	0.0708807	0.182771	0.0810471	0.0357561	0.163177	0.0317919	0.0769082
O75600	GCAT	0					0.172212	-0.180816	0.0241544	0.0051837	0.114295	-0.399419	0.136439	-0.0495613
Q9HCN8	SDF2L1	0	+				0.106636	-0.108069	-0.0165366	-0.00598999	-0.024848	-0.0230813	0.0792836	0.0104514
Q04917	YWHAH	0					-0.155725	0.181653	-0.0623811	-0.012151	0.113287	0.188325	-0.00585057	0.0985869
Q00587	CDC42EP1	0					0.153319	-0.058154	-0.00972331	0.0284806	0.225295	0.15768	0.253161	0.212045
O75439	PMPCB	0					0.027093	-0.105788	-0.00697871	-0.0285579	-0.0977946	-0.108526	-0.0199799	-0.0754336
Q16864	ATP6V1F	0					-0.166313	-0.132688	-0.366947	-0.221983	-0.140795	-0.44209	-0.236975	-0.273286
O95777	LSM8	0					-0.0614934	-0.0202838	-0.0198045	-0.0338606	0.0246514	0.0095054	-0.1042	-0.0233479
O43852	CALU	0	+				0.372045	0.225965	0.466106	0.354705	0.442009	0.446427	0.572221	0.486886
O75431	MTX2	0					0.147465	-0.0778868	0.157747	0.0757752	-0.043157	-0.0722787	-0.0660177	-0.0604845
O75925	PIAS1	0					0.0839728	-0.00657852	-0.0712538	0.00204686	-0.0474726	0.327355	0.10585	0.128577
O00161	SNAP23	0	+				-0.122412	0.0525297	-0.0722979	-0.0473933	-0.428926	-0.0308756	0.0256754	-0.144709
Q709C8	VPS13C	0					0.0626393	0.264752	0.12664	0.151344	0.145459	0.09173	0.199835	0.145675
Q9BRA2	TXNDC17	0					-0.181895	0.236269	-0.147366	-0.0309976	0.127698	0.152112	-0.0190597	0.0869166
P51116	FXR2	0					0.10853	-0.0127428	0.0652906	0.0536926	0.0910534	0.0364009	0.0725427	0.0666657
Q9BXR0	QTRT1	0					-0.113772	0.00245846	-0.032735	-0.0480163	-0.172018	0.206698	-0.27469	-0.0800034
P55317	FOXA1	0					0.256649	0.0109011	-0.0554184	0.0707106	-0.0693533	0.0277112	-0.0187967	-0.0201463
Q56P03	EAPP	0					0.212658	0.182299	-0.193168	0.067263	-0.0249497	-0.033056	0.181783	0.0412593
Q86T03	TMEM55B	2	+				-0.00888034	-0.59873	-0.0429235	-0.216845	0.927965	1.38399	-0.253722	0.686077
P49257	LMAN1	1	+				0.341012	0.302346	0.393903	0.345754	0.551543	0.481478	0.580028	0.537683
Q8IX18	DHX40	0					-0.157303	-0.164874	-0.114056	-0.145411	-0.1537	-0.126123	-0.125242	-0.135022
Q9H0H0	INTS2	1					0.012714	-0.0908128	-0.14158	-0.0732263	0.13121	0.0871198	0.0179651	0.078765
P23258	TUBG1	0					-0.176202	-0.0372658	-0.17486	-0.129443	-0.131087	-0.0733385	-0.148508	-0.117644
P62249	RPS16	0					-0.131963	-0.0731018	-0.0337236	-0.0795961	-0.0907123	-0.0574942	-0.0867417	-0.0783161
Q9BPX3	NCAPG	0					-0.204652	-0.0234673	-0.0522801	-0.0934666	-0.019136	-0.0277357	-0.15211	-0.0663271
Q5R372	RABGAP1L	0					-0.553883	-0.101938	-0.398509	-0.351443	-0.529502	-0.208734	-0.463157	-0.400465
Q9H6Q4	NARFL	0					-0.0502179	0.20163	-0.0335226	0.0392967	-0.0435591	0.183713	-0.0115454	0.0428693
Q7Z478	DHX29	0	+				-0.0837834	0.000517231	-0.0885467	-0.0572709	-0.0380216	-0.0639061	-0.0804549	-0.0607942
P04049	RAF1	0					-0.19024	-0.00722188	-0.271025	-0.156162	-0.135053	-0.059501	-0.122063	-0.105539
Q9UQR0	SCML2	0					-0.11258	-0.325672	-0.186207	-0.208153	-0.294873	-0.351194	-0.24408	-0.296715
O95248	SBF1	0					0.306452	0.52797	-0.279526	0.184965	0.262082	0.565808	-0.25294	0.19165
O43678	NDUFA2	0					-0.00491442	-0.0658325	-0.171896	-0.0808808	-0.157048	-0.139465	-0.0842302	-0.126915
Q14139	UBE4A	0					-0.0454559	-0.0920262	-0.191773	-0.109752	1.31369	0.0699951	0.112748	0.498812
Q9BY77	POLDIP3	0					0.0623945	-0.0530537	0.0966655	0.0353354	-0.119979	0.0305545	-0.0275813	-0.039002
Q96DF8	DGCR14	0					-0.286979	-0.655071	-0.174739	-0.372263	0.117326	-0.106845	-0.123164	-0.0375613
Q14353	GAMT	0					-0.428076	0.0527979	-0.350904	-0.242061	-0.166676	-0.211143	-0.207277	-0.195032
Q92692	NECTIN2	1					-0.0283186	-0.0903271	0.122714	0.00135612	-0.201859	-0.220978	-0.155224	-0.192687
Q9UIA9	XPO7	0					-0.0876491	-0.00567738	-0.213363	-0.10223	-0.0396347	-0.00125327	-0.134132	-0.0583401
Q14151	SAFB2	0					0.23773	-0.0201563	0.126939	0.114838	0.13019	0.0186502	0.0756283	0.0748227
Q10589	BST2	1	+				-0.275115	-0.384298	-0.343625	-0.334346	-0.699276	-0.650112	-0.580425	-0.643271
Q8NBJ5	COLGALT1	0	+				0.0192324	-0.0480604	0.0864345	0.0192022	-0.0335762	-0.00694942	0.119536	0.0263366
O95336	PGLS	0					-0.165895	0.260534	-0.0571004	0.0125126	0.154307	0.299618	0.111308	0.188411
Q9UK45	LSM7	0					-0.119394	-0.110825	-0.215299	-0.148506	-0.0287113	-0.0795487	-0.0637248	-0.0573283
Q03111	MLLT1	0					0.052029	-0.0516822	0.0955474	0.0319647	-0.00867339	-0.00320079	-0.00956134	-0.00714518
Q92626	PXDN	0	+				-0.0707856	-0.257983	-0.0540318	-0.1276	-0.00908515	0.00418583	-0.0177443	-0.00754787
P17535	JUND	0					-0.131214	-0.0256281	0.0984265	-0.0194719	0.653745	0.188896	0.0718424	0.304828
Q9UBB4	ATXN10	0					-0.465397	-0.140099	-0.443711	-0.349735	-0.279169	-0.325184	-0.492149	-0.365501
O00268	TAF4	0					0.142282	0.00440239	-0.0230142	0.0412233	0.0417136	-0.105551	-0.195108	-0.0863151
O15230	LAMA5	0	+				-0.134101	-0.289847	-0.149084	-0.191011	-0.280534	-0.191269	-0.111495	-0.194433
P61081	UBE2M	0					-0.272303	0.141569	-0.13499	-0.0885747	0.0254944	0.168741	0.00828431	0.0675067
Q13263	TRIM28	0					-0.0802401	-0.132217	-0.023942	-0.0787996	-0.129857	-0.119469	-0.0623219	-0.103883
P41091	EIF2S3	0					-0.0735727	0.0919462	0.0119834	0.010119	-0.0218928	0.0718684	0.0331544	0.02771
O75146	HIP1R	0					0.117276	0.116264	0.118762	0.117434	0.137918	0.189818	0.188858	0.172198
Q9NQ55	PPAN	0	+				0.290797	-0.0671905	0.0184468	0.0806842	0.0972442	-0.042421	-0.00863464	0.0153962
Q9BQ67	GRWD1	0					0.169441	-0.0686707	0.0562413	0.0523374	-0.0265776	-0.0151068	0.0446523	0.00098929
Q9H8H0	NOL11	0					0.148374	-0.0530537	0.0999327	0.0650844	-0.0127855	-0.0685636	0.00748056	-0.0246229
O95155	UBE4B	0					-0.215898	-0.0117173	0.0348295	-0.0642619	-0.154166	0.0880081	-0.0106198	-0.0255925
Q8WUA2	PPIL4	0					0.145779	-0.0671905	0.0422963	0.0402948	0.217808	-0.0607037	-0.0324097	0.041565
P36543	ATP6V1E1	0					-0.190035	0.0124651	-0.119496	-0.0990218	-0.057758	-0.0460691	-0.134375	-0.0794008
O43402	EMC8	0					-0.056543	-0.172924	-0.123814	-0.11776	-1.51011	-1.69637	-1.50924	-1.57191
Q14687	GSE1	0					0.480127	-0.0298133	0.0373259	0.162547	0.249592	-0.355882	0.0298861	-0.0254681
Q9Y248	GINS2	0					-0.405335	0.00557007	-0.0902067	-0.163324	-0.225968	0.0355438	-0.401854	-0.197426
P82663	MRPS25	0					0.0131872	-0.0339864	0.0428438	0.00734819	-0.0616334	-0.105551	-0.125975	-0.0977198
Q9Y6W3	CAPN7	0					-0.0184008	0.197815	0.192163	0.123859	0.27857	0.273566	0.369745	0.307294
Q9BRG1	VPS25	0					-0.0534969	0.106209	-0.148388	-0.0318918	-0.0295232	0.101443	0.441446	0.171122
Q9BT67	NDFIP1	3	+				0.16431	-0.0636075	0.0197846	0.0401624	0.201044	0.307545	0.159365	0.222651
Q96A65	EXOC4	0					-0.0708972	0.111507	0.116567	0.0523922	0.0864277	0.0966526	0.0971299	0.0934034
Q13136	PPFIA1	0					-0.13346	0.0109011	0.0778129	-0.0149152	0.0963582	0.066081	0.22355	0.128663
Q4VC44	FLYWCH1	0					0.165887	-0.0290532	-0.00919523	0.0425462	0.125663	0.158006	0.144222	0.142631
Q5JSH3	WDR44	0					-0.660057	-0.368362	-0.473653	-0.500691	-0.376279	-0.406479	-0.488925	-0.423894
P09661	SNRPA1	0					0.0740683	-0.0339864	0.0782655	0.0394491	-0.0218928	-0.0266418	0.000666279	-0.0159561
Q9NZ32	ACTR10	0					-0.0767991	-0.026263	-0.0455673	-0.0495431	0.143627	0.246704	-0.0294102	0.120307
P17931	LGALS3	0					-0.288324	0.0249071	-0.313174	-0.192197	-0.151558	-0.0836305	-0.199292	-0.144827
P25685	DNAJB1	0					-0.0366843	0.256621	0.0560095	0.091982	0.056393	0.218937	0.075488	0.116939
P22670	RFX1	0					0.0365588	-0.178304	0.267805	0.04202	0.126567	0.122841	0.116124	0.121844
P19474	TRIM21	0					-0.242396	0.0872689	0.532682	0.125852	0.122728	0.0514245	-0.100601	0.0245171
Q92922	SMARCC1	0					0.186947	-0.0489354	0.0754623	0.0711579	-0.00217317	-0.130966	0.0176954	-0.0384812
Q8TEM1	NUP210	1					0.141894	-0.0309527	0.0908283	0.0672565	-0.00867339	-0.0813935	0.0187749	-0.023764
P56937	HSD17B7	1					0.0149625	-0.0859487	0.201064	0.0433592	-0.107825	-0.0234926	-0.239911	-0.123743
O43159	RRP8	0					0.288218	0.052932	0.155053	0.165401	0.197952	0.161057	0.067368	0.142125
Q14156	EFR3A	0					0.173666	0.073191	0.183296	0.143384	-0.184922	0.105964	0.0599877	-0.00632337
Q96EY7	PTCD3	0					0.0575074	-0.0564144	0.0946499	0.0319143	-0.0914902	-0.0857324	-0.0218184	-0.066347
Q9H0C8	ILKAP	0					-0.269583	0.122443	-0.211853	-0.119664	-0.0204641	0.0682559	-0.111002	-0.02107
Q96I15	SCLY	0					-0.368133	0.0974686	-0.182435	-0.151033	0.634935	0.312555	0.411241	0.45291
Q9BQG0	MYBBP1A	0					0.241882	-0.0135115	0.0613135	0.0965614	0.127133	-0.00888925	0.00426985	0.0408377
P27694	RPA1	0					-0.195777	-0.0632364	-0.216273	-0.158429	-0.109938	-0.0755879	-0.174832	-0.120119
P57772	EEFSEC	0					-0.0121383	-0.0458077	0.0341446	-0.0079338	-0.0236259	0.11745	0.0420436	0.0452893
Q9NZJ6	COQ3	0					0.0625169	-0.64088	0.105364	-0.157666	-0.0588522	-0.175934	-0.0161642	-0.0836502
Q9NS86	LANCL2	0					-0.123811	-0.0304464	-0.21822	-0.124159	-0.098762	0.0691472	-0.123042	-0.0508855
Q9NQZ2	UTP3	0					0.409446	0.0772772	0.240567	0.24243	0.188361	0.0248735	0.270718	0.161318
Q96LD4	TRIM47	0					0.0169772	0.252333	0.12707	0.132127	0.2106	0.282791	0.0886042	0.193998
P52758	RIDA	0					-0.156988	-0.0839984	-0.0781893	-0.106392	-0.213071	-0.244808	-0.0927513	-0.183543
O75616	ERAL1	0					0.0946966	-0.0766614	-0.0137879	0.00141578	-0.0108337	-0.0146932	-0.0770485	-0.0341918
Q9Y221	NIP7	0					0.16103	0.0350712	0.0403907	0.0788307	0.115192	0.00978574	0.101412	0.0754633
Q15554	TERF2	0					0.379923	0.124415	0.191027	0.231788	0.0892895	0.249301	0.260101	0.199564
Q9UN37	VPS4A	0					-0.24299	0.01756	-0.174708	-0.13338	-0.0990522	0.0907503	-0.128415	-0.0455723
Q9UKK6	NXT1	0					0.182284	-0.0298133	0.0122774	0.0549162	0.106581	-0.139592	-0.082847	-0.0386194
P38935	IGHMBP2	0					-0.067993	0.0561543	0.13816	0.0421073	0.297793	0.280133	0.169833	0.249253
Q9BQC3	DPH2	0					-0.178482	0.0978836	0.209267	0.0428896	0.393179	-0.165786	-0.000799253	0.0755312
P49321	NASP	0					-0.41618	-0.114652	-0.286009	-0.27228	-0.213071	-0.168887	-0.323313	-0.23509
O00203	AP3B1	0					0.000468921	0.118929	-0.0578419	0.0205187	0.161702	0.255675	0.0722625	0.163213
Q86VV8	RTTN	0					-0.0872079	0.00803805	-0.123247	-0.0674723	-0.0666856	-0.177167	-0.156539	-0.133464
Q9BQ69	MACROD1	0					0.295536	-0.338101	0.0796962	0.012377	0.0629775	-0.0678992	-0.053105	-0.0193422
Q9BTT4	MED10	0					-0.0787981	-0.026136	-0.111694	-0.0722092	-0.168797	-0.0677662	-0.139222	-0.125262
Q9H6E4	CCDC134	0	+				0.0333168	-0.279659	-0.0644321	-0.103592	-0.346043	-0.380707	-0.255844	-0.327531
P42356	PI4KA	0	+				0.207777	0.0511895	0.16873	0.142565	0.18612	-0.0580296	0.205969	0.111353
O15397	IPO8	0					-0.240314	0.145854	-0.0381889	-0.0442163	-0.147543	0.0132969	0.0508497	-0.0277987
P29218	IMPA1	0					-0.285634	0.0815117	-0.321294	-0.175138	-0.114441	-0.035233	-0.140794	-0.0968228
Q9P031	CCDC59	0					0.0253028	-0.0282928	0.0403024	0.0124375	0.162165	0.0435629	0.0696033	0.0917772
P62070	RRAS2	0					0.191624	0.0700662	0.191516	0.151069	0.157422	0.0180857	0.114897	0.0968014
P51659	HSD17B4	0					0.10853	0.0322923	0.204201	0.115008	0.0513402	0.109447	0.206323	0.12237
Q9UKR5	C14orf1	4	+				-0.199456	-0.5583	-0.652278	-0.470011	-0.659833	-0.688224	-0.373748	-0.573935
O75586	MED6	0					-0.0504442	-0.279872	-0.0744813	-0.134933	-0.265363	-0.0941104	-0.103581	-0.154351
Q9UBB5	MBD2	0					0.522481	0.124133	0.206811	0.284475	0.368099	0.215212	0.214942	0.266084
P14635	CCNB1	0					-0.181895	-0.061379	-0.263474	-0.168916	0.00529165	-0.033056	-0.132796	-0.0535202
Q9NPA0	EMC7	1	+				0.243407	-0.0905699	0.0724303	0.0750893	-1.32139	-1.17932	-0.7719	-1.09087
Q04721	NOTCH2	1	+				0.290653	0.231055	0.403238	0.308315	0.42425	0.286729	0.362926	0.357968
Q96QD8	SLC38A2	11	+				0.40469	0.282318	0.621084	0.43603	0.601347	0.618737	0.771075	0.663719
Q14693	LPIN1	0					-0.130679	-0.185712	0.53509	0.0728999	-0.0773263	-0.42268	-0.560146	-0.353384
O43776	NARS	0					-0.0450013	0.0815117	0.00114925	0.0125532	0.0879679	0.210723	0.128028	0.14224
Q9P260	KIAA1468	0					-0.0314184	0.151874	-0.0132105	0.0357483	-0.00310367	0.121809	0.0124445	0.0437167
P51946	CCNH	0					-0.194344	0.0715599	-0.0841215	-0.0689684	0.109706	-0.0455293	-0.0596396	0.00151245
Q92466	DDB2	0					0.128507	0.115704	0.134918	0.126376	0.196408	-0.0359127	0.145003	0.101833
Q8NAV1	PRPF38A	0					0.182417	-0.193873	-0.00152517	-0.00432686	0.0870876	-0.229084	0.0472657	-0.031577
Q6IA86	ELP2	0					-0.360211	0.263619	-0.188541	-0.0950445	-0.0350933	0.0804754	-0.0560557	-0.00355786
Q9HA77	CARS2	0					0.0898235	0.0503861	0.159163	0.0997909	-0.0520751	0.107764	0.0394395	0.0317096
O15119	TBX3	0					0.186013	0.259883	0.00408653	0.149994	-0.00258679	0.0647543	0.121331	0.0611663
Q15646	OASL	0					-0.222845	-0.579912	-0.700449	-0.501068	-0.0861341	-0.244102	-0.48864	-0.272959
Q6NUQ1	RINT1	0					0.0982051	0.0407787	-0.117158	0.0072753	0.158231	-0.0293747	-0.0936256	0.0117434
P21589	NT5E	0	+				0.689505	0.271369	1.01758	0.659484	0.754733	-0.0177239	0.403977	0.380329
Q9H0A0	NAT10	0					0.0944461	-0.109508	0.0018186	-0.00441439	-0.0727052	-0.145776	-0.126219	-0.1149
P11802	CDK4	0					-0.26861	0.0558856	-0.185514	-0.132746	-0.128815	-0.0982811	-0.227447	-0.151514
Q12800	TFCP2	0					-0.37962	-0.190478	-0.159652	-0.24325	-0.0749686	0.00838382	-0.0496333	-0.0387394
Q96D71	REPS1	0					-0.114747	0.0843877	-0.0128536	-0.0144043	-0.119598	0.0788411	0.0520924	0.00377849
O43464	HTRA2	1					0.279798	0.0200486	0.238826	0.179558	0.0388381	0.05527	0.299109	0.131073
Q99832	CCT7	0					-0.247243	-0.0151757	-0.139262	-0.133894	-0.20779	-0.113815	-0.196271	-0.172625
Q96EL3	MRPL53	0					0.17076	0.00323566	-0.0536849	0.0401037	-0.0551687	-0.0560206	0.0782986	-0.0109636
Q9Y4E8	USP15	0					-0.249906	0.117666	-0.0635137	-0.0652513	-0.0329689	0.140823	-0.0219497	0.0286348
O43237	DYNC1LI2	0					0.0324774	0.383688	0.106268	0.174144	0.200449	0.364791	0.134727	0.233322
Q9Y613	FHOD1	0					-0.121011	0.0962244	-0.0632512	-0.0293461	0.150623	0.0609851	0.0405352	0.0840477
Q14146	URB2	0					0.00999703	-0.0224494	0.0534096	0.0136524	-0.156677	-0.0522633	-0.0541319	-0.0876906
O43752	STX6	1	+				0.135571	-0.165566	-0.0390236	-0.0230062	-0.317322	-0.168267	-0.172706	-0.219432
P11047	LAMC1	0	+				-0.0847784	-0.287095	-0.0628901	-0.144921	-0.108209	-0.146909	-0.0941251	-0.116414
Q9H9J2	MRPL44	0					0.0697566	-0.0939657	-0.0753931	-0.0332007	-0.186924	-0.0698915	-0.056312	-0.104376
P10606	COX5B	0					0.10361	-0.0372658	0.022969	0.0297711	0.0143638	-0.019512	0.0843599	0.0264039
P82933	MRPS9	0					0.0944461	-0.0969909	0.0161389	0.00453138	-0.0715231	-0.0982811	-0.0484743	-0.0727595
Q9BVC5	C2orf49	0					0.0919456	-0.0612551	0.103391	0.0446939	-0.073493	-0.0300572	0.0467152	-0.018945
Q3SY69	ALDH1L2	0				+	1.01954	0.738324	1.00352	0.920461	1.31151	1.25546	1.37492	1.31396
Q9NPJ6	MED4	0					0.18935	-0.0150477	-0.449498	-0.0917317	-0.0494757	-0.0395772	0.0175605	-0.0238308
Q96JB2	COG3	0					0.221787	0.398438	0.107025	0.242417	0.546467	0.466173	0.176639	0.396426
Q9NV35	NUDT15	0					-0.124994	0.174939	-0.320058	-0.0900377	0.0908328	-0.0160715	0.280136	0.118299
O00425	IGF2BP3	0					-0.0562049	0.0498505	0.0846877	0.0261111	-0.00558173	0.108665	0.078158	0.0604139
O15504	NUPL2	0					0.252734	0.252503	0.198287	0.234508	0.0615718	0.0756662	0.211682	0.116307
P49914	MTHFS	0					-0.136235	0.161617	-0.0668406	-0.0138197	0.00539566	0.0279954	0.152625	0.0620053
Q07955	SRSF1	0					0.250501	-0.0360054	0.0976374	0.104044	0.0877477	0.0118914	0.0543042	0.0513145
Q9BSH4	TACO1	0					0.0471767	-0.0298133	0.0706107	0.0293247	-0.048074	0.0180857	0.115907	0.0286396
Q9HD33	MRPL47	0					0.104492	-0.0380216	-0.108341	-0.013957	-0.0960516	-0.139592	-0.174478	-0.136707
Q9Y597	KCTD3	0					-0.931719	0.111787	-0.155687	-0.325206	-0.120932	-0.327518	-0.274139	-0.240863
Q9NXE4	SMPD4	1					-0.137194	-0.141271	-0.151941	-0.143469	-0.17569	-0.349008	-0.198827	-0.241175
Q9H0E3	SAP130	0					-0.0234836	-0.0215581	-0.10463	-0.0498907	-0.0479738	-0.135158	-0.0378709	-0.0736677
Q9NYU2	UGGT1	0					0.223291	0.121599	0.299214	0.214701	0.197239	0.216005	0.323578	0.245607
O14657	TOR1B	0	+				0.465909	0.305026	-0.049549	0.240462	0.0937033	0.382826	0.31025	0.26226
Q99436	PSMB7	0					-0.0783541	0.109832	0.0218721	0.0177833	0.0613555	0.180251	0.0556884	0.0990983
Q13371	PDCL	0					-0.184373	-0.0996477	-0.112566	-0.132196	-0.0013457	-0.233476	-0.0467986	-0.0938733
P42766	RPL35	0					0.0766616	-0.093481	-0.0790824	-0.0319673	0.0188686	-0.00375677	-0.0189283	-0.00127215
Q9BUN8	DERL1	4	+				0.238836	0.268937	0.298876	0.268883	0.247992	0.433913	0.45216	0.378022
O60518	RANBP6	0					-0.258652	0.123992	-0.313726	-0.149462	0.742275	-0.155065	-0.363325	0.0746283
O75935	DCTN3	0					-0.200681	0.0616759	-0.0367856	-0.0585968	0.130983	0.22077	0.0116385	0.121131
Q9BX68	HINT2	0					0.298992	0.065459	0.173962	0.179471	0.216003	0.160885	0.209031	0.195306
Q9UBU6	FAM8A1	3	+				0.315496	0.143138	-0.175787	0.0942826	-0.201229	0.0581829	-0.00159792	-0.0482145
O43422	THAP12	0					0.407035	-0.501352	-0.474271	-0.189529	-0.335247	0.0166757	-2.27728	-0.865283
Q9P015	MRPL15	0					0.113974	-0.148988	-0.168162	-0.0677251	-0.0128881	-0.110722	-0.133889	-0.0858331
Q96RS0	TGS1	0					-0.140495	-0.187643	-0.136488	-0.154875	0.505694	-0.121007	-0.0351429	0.116515
Q9BRD0	BUD13	0					0.640574	-0.0186256	-1.11852	-0.165523	0.189896	0.0666499	0.000533048	0.0856929
Q9BTE7	DCUN1D5	0					-0.222945	0.110669	-0.155594	-0.08929	0.0481241	0.0759159	0.0117727	0.0452709
P10109	FDX1	0					-0.114206	-0.458244	-0.248123	-0.273524	-0.450686	-0.497221	-0.390311	-0.446073
Q9Y375	NDUFAF1	0					0.0718492	-0.156779	-0.0375709	-0.0408335	-0.195994	-0.101401	0.0833716	-0.0713413
Q02241	KIF23	0					0.322807	0.226827	0.206039	0.251891	0.135868	0.144376	0.231725	0.170656
O14672	ADAM10	1	+				0.102603	-0.0644732	0.0187245	0.0189515	0.0208637	0.0243066	0.0371136	0.0274279
Q9UHA3	RSL24D1	0					0.229874	0.038918	0.0554926	0.108095	0.0285548	-0.157315	-0.0417594	-0.05684
P61160	ACTR2	0					-0.0620549	0.115003	0.0485956	0.033848	0.0731832	0.193509	0.063882	0.110191
Q9HCU5	PREB	1	+				-0.0385113	0.0279357	0.132567	0.0406638	-0.0418497	-0.216069	-0.0784372	-0.112119
P42704	LRPPRC	0					-0.0422723	-0.19229	-0.0945169	-0.109693	-0.18847	-0.22062	-0.147546	-0.185545
P52732	KIF11	0					-0.258456	-0.0569116	-0.227344	-0.180904	-0.165014	-0.0964579	-0.305419	-0.188964
P36405	ARL3	0					0.0146073	0.248473	-0.0548078	0.0694241	0.146375	0.249881	0.0881791	0.161479
Q9UK59	DBR1	0					-0.183548	0.090156	-0.182374	-0.091922	-0.1615	0.0398342	0.164985	0.0144399
Q92547	TOPBP1	0					0.00222855	-0.261223	-0.010949	-0.0899813	-0.188925	-0.114845	-0.108656	-0.137475
O75165	DNAJC13	0	+				-0.0288933	-0.0219401	0.0129	-0.0126445	-0.119312	-0.0521289	-0.0219497	-0.0644635
Q9GZL7	WDR12	0					0.0977034	0.00790806	0.0839788	0.0631968	-0.0297262	-0.0426917	0.0262181	-0.0153999
Q96SL1	DIRC2	12	+				-0.459187	-0.418846	-0.823463	-0.567165	-0.429234	-0.375991	-0.33424	-0.379822
Q9Y2W2	WBP11	0					0.19887	-0.0372658	0.0458851	0.0691632	0.0320451	0.00460505	0.0245909	0.0204137
Q9NVM9	INTS13	0					-0.154884	-0.155735	-0.145213	-0.151944	-0.152117	-0.0553504	-0.125242	-0.110903
P50579	METAP2	0					0.131328	-0.0122301	0.280037	0.133045	0.38018	0.325677	0.00721278	0.23769
Q32P41	TRMT5	0					-0.136128	0.0387852	-0.156979	-0.084774	-0.112814	-0.104256	-0.137649	-0.118239
Q9UL25	RAB21	0					0.165887	0.109135	0.122117	0.132379	0.0828035	0.0557044	0.204541	0.11435
Q96BP3	PPWD1	0					0.00587225	-0.0347439	0.061868	0.0109988	-0.0698466	-0.0127611	0.0527833	-0.00994146
P30086	PEBP1	0					-0.269875	0.218394	-0.158762	-0.0700807	0.00010353	0.0496065	-0.0921265	-0.0141388
Q96EN8	MOCOS	0					-0.216201	0.313581	-0.0934405	0.00131328	0.0338464	0.3898	0.368643	0.264097
P20700	LMNB1	0					0.0762909	-0.0909342	0.0519157	0.0124242	-0.0395338	-0.0758523	0.0233715	-0.0306716
Q8WUM0	NUP133	0					-0.0204823	-0.148404	-0.104758	-0.091215	-0.181912	-0.133	-0.0639797	-0.126297
Q6P1A2	LPCAT3	9	+				-0.234547	-0.423384	-0.330459	-0.329464	-0.350274	-0.44373	-0.308005	-0.367336
Q92552	MRPS27	0					0.0660708	-0.0892338	0.00959937	-0.0045212	-0.161037	-0.18307	-0.0657631	-0.136623
Q9Y5P4	COL4A3BP	0					0.412563	0.0697949	-0.784674	-0.100772	0.16646	0.0571099	0.0920083	0.105193
P07686	HEXB	0	+				-0.123381	-0.351843	-0.216612	-0.230612	-0.461483	-0.325184	-0.339936	-0.375534
P35251	RFC1	0					0.26846	-0.140099	0.0234395	0.0506001	0.0206536	-0.0323749	-0.0496333	-0.0204515
P61086	UBE2K	0					-0.141558	0.234123	-0.0275969	0.0216563	0.104352	0.244292	0.0270324	0.125226
Q15172	PPP2R5A	0					-0.249709	-0.0256281	-0.282912	-0.186083	-0.157513	0.17012	-0.130607	-0.0393332
P60900	PSMA6	0					-0.0248667	0.156189	0.00756406	0.0462956	0.0442745	0.0996652	0.0795652	0.0745016
Q16706	MAN2A1	1	+				0.0485095	-0.0294334	0.0387693	0.0192818	0.00935145	-0.0786256	0.0617944	-0.00249324
Q15714	TSC22D1	0					-0.469889	0.00427277	-0.26818	-0.244599	-0.0525746	-0.0200617	-0.285006	-0.119214
Q15800	MSMO1	3	+				0.480078	0.319006	-0.116589	0.227498	0.0944771	0.381355	0.2755	0.250444
Q659A1	ICE2	0					-0.1029	-0.129974	0.243974	0.0037004	0.0159336	0.10436	-0.00664659	0.0378825
Q13573	SNW1	0					0.21293	-0.0176043	0.0330215	0.0761156	0.0914948	-0.047418	-0.00412453	0.0133174
O15021	MAST4	0					0.237868	0.215344	0.349294	0.267502	0.351355	0.760824	0.481568	0.531249
Q14126	DSG2	1	+				0.04379	-0.111185	0.0886388	0.00708138	-0.0804641	-0.116388	0.0647179	-0.0440446
O14777	NDC80	0					-0.164746	0.104262	-0.0643502	-0.0416112	0.0413938	-0.0775697	-0.288828	-0.108335
P54578	USP14	0					-0.138366	0.200249	-0.0124627	0.0164732	0.112055	0.138076	0.0446523	0.0982612
O95714	HERC2	0	+				-0.0708972	0.0607317	0.0162428	0.00202576	0.0392638	0.149266	0.0327455	0.0737583
Q01650	SLC7A5	12	+				0.100717	0.00557007	0.113744	0.0733434	0.132004	0.204079	0.320513	0.218866
P13498	CYBA	0	+				0.445399	-0.211398	0.0397912	0.0912638	-0.0576586	-0.197964	0.062629	-0.0643313
O75691	UTP20	0					0.030441	-0.152365	-0.0666441	-0.062856	-0.195542	-0.20124	-0.19662	-0.197801
P36956	SREBF1	2	+				-0.292062	-0.0654619	0.141864	-0.0718867	-0.628019	-0.0260947	-1.11439	-0.589501
O00505	KPNA3	0					-0.0794639	-0.0209211	-0.0544116	-0.0515989	-0.0232184	-0.0824466	-0.0598954	-0.0551868
Q9H9P8	L2HGDH	0					0.0213718	-0.00529102	-0.123263	-0.0357274	0.0491955	-0.0371351	-0.0201113	-0.00268365
Q9Y224	C14orf166	0					0.0884521	0.0446406	0.0703585	0.0678171	0.101571	0.166066	0.123101	0.130246
Q9NYH9	UTP6	0					0.0487519	-0.0846082	-0.00522008	-0.0136921	-0.0617326	-0.0501119	0.0203955	-0.030483
Q13867	BLMH	0					-0.242198	0.152736	-0.0926366	-0.0606995	0.0191835	-0.00888925	-0.0722408	-0.0206489
Q7L7X3	TAOK1	0					-0.210134	-0.0431753	0.0655057	-0.0626013	-0.0420509	-0.080735	-0.0708461	-0.064544
Q9H0C5	BTBD1	0					-0.315985	-0.225953	-0.33916	-0.293699	-0.489342	-0.252781	-0.364567	-0.368897
P30040	ERP29	0	+				0.0945713	0.0854846	0.22989	0.136649	0.0596275	0.0914627	0.238436	0.129842
Q14CX7	NAA25	0	+				-0.126175	0.027145	-0.0297315	-0.0429206	0.0833521	-0.0203364	0.029206	0.0307405
P49588	AARS	0					-0.167566	0.260781	0.0493052	0.0475069	0.255514	0.354405	0.25224	0.287387
Q08AM6	VAC14	0					-0.0863249	0.0411777	-0.118533	-0.0545599	0.161354	0.0193559	0.0036018	0.0614374
Q9C0B7	TANGO6	1					-0.00713201	-0.349612	-0.737223	-0.364656	-0.319648	-0.370936	-0.504412	-0.398332
Q9H1C7	CYSTM1	1					-0.535887	-0.875515	1.06791	-0.114497	1.20374	-0.410677	-0.14959	0.21449
O60925	PFDN1	0					-0.132818	0.16628	-0.0884499	-0.0183293	-0.0421515	0.0769001	-0.0429238	-0.00272507
O14578	CIT	0					-0.03988	0.0186074	0.0288347	0.00252069	0.0220201	0.00348737	0.079706	0.0350712
Q9NQX4	MYO5C	0					0.0284072	0.081375	-0.109756	8.69e-06	-0.170822	0.0526521	0.376526	0.0861188
Q9UPM8	AP4E1	0					0.0354774	0.803846	0.0740358	0.304453	0.00238412	0.382463	0.369951	0.251599
Q8TCT8	SPPL2A	9	+				-0.0529321	0.0546765	-0.0491347	-0.0157968	0.119799	0.0484533	0.078158	0.0821368
O75822	EIF3J	0					-0.135168	0.0657295	-0.00687623	-0.0254383	0.0188686	0.0906021	-0.0260119	0.0278196
Q9P035	HACD3	6	+				0.0878291	-0.113218	0.0559917	0.0102009	-0.00217317	-0.0122085	0.0345186	0.00671229
Q6PD74	AAGAB	0					-0.378899	0.225209	-0.0753931	-0.0763611	-0.646066	0.27069	0.112028	-0.0877828
Q9BVW5	TIPIN	0					-0.427641	-0.405926	-0.301396	-0.378321	-0.434914	-0.399102	-0.522333	-0.452116
Q15650	TRIP4	0					0.0480247	-0.0598914	0.0291669	0.00576672	0.0887388	-0.0410675	-0.14983	-0.0340528
P83111	LACTB	0					0.461689	0.284426	0.422711	0.389609	0.150623	0.125027	0.281286	0.185645
O60563	CCNT1	0					0.160506	-0.0202838	0.125386	0.0885361	0.0897303	0.111989	0.156882	0.119534
Q96CS3	FAF2	0	+				0.143964	-0.0900841	0.0140942	0.0226581	0.0559622	-0.0267786	-0.0471854	-0.00600058
Q96CW5	TUBGCP3	0					-0.084889	0.104957	-0.00316847	0.00563328	-0.108882	0.0405504	-0.256736	-0.108356
P56192	MARS	0	+				0.0513002	0.125543	0.0934787	0.0901072	0.146605	0.201161	0.195724	0.181163
P06576	ATP5B	0					-0.0102775	-0.131037	-0.0104555	-0.0505899	-0.121599	-0.1133	-0.0335817	-0.0894934
Q03060	CREM	0					0.0138972	-0.146187	0.0015611	-0.0435761	-0.148291	-0.0882248	-0.0551582	-0.0972245
P23588	EIF4B	0					0.0641091	0.0259599	0.0700344	0.0533678	0.161586	0.0704341	0.0274397	0.0864867
P61923	COPZ1	0					-0.16767	0.173728	0.0432501	0.0164359	0.110154	0.263965	0.173405	0.182508
O95857	TSPAN13	4	+				0.036679	-0.070888	-0.000976934	-0.0117286	-0.0738865	-0.018412	-0.0325399	-0.0416128
P49790	NUP153	0					0.131714	-0.0242304	0.136048	0.0811772	0.0552089	0.000696877	0.0746457	0.0435172
P22830	FECH	0					-0.12639	-0.0241032	-0.0804451	-0.0769795	-0.19744	-0.272985	-0.22756	-0.232662
Q96EE3	SEH1L	0					-0.0675457	-0.0985615	-0.0173669	-0.061158	-0.0482742	-0.0828414	-0.0403349	-0.0571501
Q7L5N7	LPCAT2	1	+				0.0757969	0.0157289	0.104165	0.0652303	-0.168612	-0.0297842	0.0610992	-0.0457658
Q15390	MTFR1	0					0.0939457	-0.00953555	0.152973	0.0791278	0.139286	0.118932	0.132724	0.130314
O75190	DNAJB6	0					0.0220858	0.0251703	-0.109454	-0.0207327	-0.0247463	0.200841	-0.00836969	0.0559082
Q15382	RHEB	0					-0.235344	0.0619458	-0.254447	-0.142615	0.00737226	0.0943454	-0.101471	8.22693e-05
P20618	PSMB1	0					-0.0694458	0.0956716	-0.00477586	0.00714998	0.0468399	0.145932	0.0703028	0.0876916
Q15363	TMED2	1	+				0.106509	0.0419761	0.0847425	0.0777427	0.0713321	0.1024	0.134595	0.102776
P25490	YY1	0					-0.141451	-0.235648	-0.0360333	-0.137711	-0.12217	-0.112913	-0.0341022	-0.0897284
Q13362	PPP2R5C	0					0.37604	0.326833	0.25537	0.319414	0.284613	0.246059	0.330866	0.287179
Q9UKL0	RCOR1	0	+				0.0261379	-0.074453	0.0253228	-0.0076641	-0.158348	-0.203299	-0.0610453	-0.140897
Q9HB40	SCPEP1	0	+				-0.0528191	-0.0666969	0.0367981	-0.0275726	-0.383998	-0.208613	-0.332971	-0.308528
Q9Y5Y2	NUBP2	0					-0.580463	0.0856217	0.0215065	-0.157778	0.235014	0.0341167	0.14903	0.139387
Q9Y4R8	TELO2	0	+				-0.19547	0.0725111	-0.161294	-0.0947508	-0.0589516	-0.111496	-0.186821	-0.119089
Q5T9L3	WLS	7	+				0.100842	0.0133782	0.067337	0.0605191	-0.0945004	-0.108397	-0.0356629	-0.0795201
Q92793	CREBBP	0					-0.0983084	-0.140451	-0.0674788	-0.102079	-0.172845	-0.0718812	-0.0859887	-0.110238
Q9BT22	ALG1	1	+				0.0260187	-0.00387334	-0.00933145	0.00427129	-0.00124225	0.00740323	-0.0129986	-0.00227921
Q9BUZ4	TRAF4	0					-0.122412	-0.201313	-0.0465804	-0.123435	-0.270094	-0.100882	-0.0822178	-0.151065
Q14562	DHX8	0	+				0.0969511	-0.110466	-0.00486127	-0.00612547	-0.0593492	-0.136427	-0.100353	-0.0987094
Q14019	COTL1	0					-0.155725	0.341108	0.00470567	0.0633629	0.150738	0.26812	0.155442	0.191433
Q6P1Q9	METTL2B	0					-0.0593578	0.168575	0.0308476	0.0466881	0.0753641	-0.006256	-0.0203741	0.0162447
P45985	MAP2K4	0					-0.308244	0.324144	-0.46063	-0.148243	-0.0250515	0.181183	0.0655542	0.0738951
Q9BS26	ERP44	0	+				0.170233	0.154174	0.259305	0.19457	0.191551	0.21845	0.315746	0.241916
Q14691	GINS1	0					-0.350867	-0.0767841	-0.164862	-0.197504	-0.358698	-0.249972	-0.482931	-0.363867
P55011	SLC12A2	12	+				-0.496718	-0.479912	-0.48705	-0.487893	-0.493541	-0.474939	-0.291117	-0.419866
Q9Y6A4	CFAP20	0					-0.00748187	-0.0478103	0.0359539	-0.00644609	0.0296116	0.0474451	0.00253366	0.0265301
P19784	CSNK2A2	0					-0.00899689	0.0677608	0.0234222	0.0273954	-0.111089	0.0168165	-0.00505421	-0.0331088
O75208	COQ9	0					0.138406	-0.0726101	0.0157053	0.0271671	-0.107344	-0.119982	0.0140583	-0.0710893
O15047	SETD1A	0					0.129019	0.0171673	0.131703	0.0926298	0.128038	0.153785	0.180122	0.153981
Q9UEG4	ZNF629	0					0.00446069	-0.210505	0.0175092	-0.0628449	-0.240331	-0.938593	-0.131216	-0.436713
O15269	SPTLC1	1	+				-0.142407	-0.187643	-0.0532717	-0.127774	-0.152955	-0.0407966	-0.0721141	-0.0886221
Q9NX63	CHCHD3	0					0.128635	0.016775	0.102894	0.0827679	-0.0389292	0.0295587	0.068625	0.0197515
O14745	SLC9A3R1	0					-0.0177062	-0.0140238	0.110908	0.0263926	-0.0272891	0.0563852	0.0975575	0.0422179
Q9NX62	IMPAD1	1	+				0.103988	0.0431745	0.144988	0.0973836	0.036818	0.00195189	0.0954207	0.0447302
P61019	RAB2A	0					0.109541	0.0254334	0.0974172	0.0774639	0.116876	0.121067	0.155011	0.130985
O43847	NRDC	0					-0.14177	0.133746	-0.0982217	-0.0354152	0.012482	0.106369	-0.0764168	0.0141447
P23142	FBLN1	0	+				0.572569	0.258614	0.269396	0.36686	0.281588	0.125422	0.592108	0.33304
P16035	TIMP2	0	+				0.431959	0.246079	0.494595	0.390878	0.50349	0.475422	0.355287	0.444733
Q08380	LGALS3BP	0	+				0.128635	0.086857	0.215445	0.143646	0.299831	0.158582	0.364366	0.27426
Q92900	UPF1	0					-0.0502179	-0.00361556	0.0174572	-0.0121254	-0.0252551	0.0374015	0.0226946	0.0116137
P55199	ELL	0					0.0242297	-0.0791113	-0.196269	-0.0837169	-0.144829	0.235539	-0.0344927	0.0187394
O14579	COPE	0					-0.0153889	0.0756414	0.0613671	0.0405398	0.127585	0.170277	0.176293	0.158052
Q9Y6X3	MAU2	0					-0.0288933	-0.147237	0.0349522	-0.0470595	-0.0414472	-0.0532036	0.158993	0.0214473
O60488	ACSL4	1	+				0.0400494	-0.00696463	0.0294471	0.020844	-0.0349922	-0.00930453	-0.0688151	-0.0377039
Q9Y3Z3	SAMHD1	0					-0.334229	-0.137515	-0.499959	-0.323901	-0.656551	-0.294501	-0.442619	-0.464557
P18887	XRCC1	0					-0.0734614	-0.0931176	-0.0682477	-0.0782755	0.0448085	-0.103737	-0.0270584	-0.0286623
Q8N129	CNPY4	0	+				0.054583	-0.0927537	0.193084	0.0516376	-0.0885711	0.0848129	0.138168	0.0448035
Q969H8	MYDGF	0	+				0.254271	0.166556	0.256885	0.225904	0.162745	0.191742	0.319016	0.224501
P36507	MAP2K2	0					-0.0430688	0.374089	0.149945	0.160322	0.267682	0.332608	0.347315	0.315869
Q9BW85	CCDC94	0					-0.029123	0.0429081	-0.125025	-0.0370799	0.0407546	-0.0199243	-0.0730009	-0.0173902
Q8N2W9	PIAS4	0					-0.228558	-0.211287	-0.559226	-0.333024	-0.178164	0.0275691	-0.0226056	-0.0577335
P55060	CSE1L	0					-0.243783	-0.0165822	-0.117348	-0.125904	-0.0933358	-0.0382211	-0.122675	-0.0847438
Q9Y3S2	ZNF330	0					0.347127	-0.0933598	-0.216819	0.0123159	-0.00217317	-0.096979	0.0949937	-0.00138616
P27361	MAPK3	0					-0.338592	0.247414	-0.00433143	-0.0318366	-0.163351	0.0767972	-0.0389089	-0.0418208
Q96HY7	DHTKD1	0					0.0693876	-0.151201	0.0674089	-0.00480155	0.146605	0.0449995	0.0256754	0.0724266
Q9NVV4	MTPAP	0					0.0599489	-0.0417943	0.0107046	0.00961974	-0.0656964	-0.0546799	0.0668095	-0.0178556
Q86W50	METTL16	0					-0.123058	-0.225621	-0.29568	-0.214786	-0.247066	-0.196141	-0.137286	-0.193498
Q16204	CCDC6	0					-0.28496	0.115003	-0.0869171	-0.0856248	-0.0482742	0.0277112	-0.0918765	-0.0374799
P52907	CAPZA1	0					-0.057219	0.138719	0.0228994	0.0347999	0.0366058	0.138107	0.102413	0.0923752
Q92890	UFD1	0					0.0412549	0.174764	0.0919975	0.102672	0.0900609	0.14567	0.154952	0.130228
P54198	HIRA	0					0.0120049	-0.025374	-0.120632	-0.044667	-0.165384	-0.154439	-0.0429238	-0.120916
P49593	PPM1F	0					-0.149293	0.285686	0.0899704	0.0754545	0.0125865	0.355064	0.239364	0.202338
Q712K3	UBE2R2	0					-0.201496	0.175231	-0.113501	-0.0465891	-0.0919761	-0.138453	-0.163337	-0.131255
P61158	ACTR3	0					0.0109416	0.138577	0.105548	0.0850222	0.102683	0.233261	0.0350644	0.12367
Q9NVP1	DDX18	0					0.302183	-0.0168378	0.0867987	0.124048	0.141569	0.0214756	0.0538893	0.0723114
Q9NP61	ARFGAP3	0					0.199543	0.659814	0.321174	0.39351	0.632589	0.677732	0.681658	0.663993
Q09472	EP300	0					-0.144105	-0.0409149	0.101385	-0.0278784	-0.158534	-0.0990618	-0.21384	-0.157145
Q6ICB0	DESI1	0					-0.339889	0.188694	-0.284039	-0.145078	-0.0849628	-0.446493	-0.0577208	-0.196392
P53680	AP2S1	0					-0.041703	-0.0333549	-0.0803317	-0.0517965	-0.0329689	-0.00778097	-0.0378709	-0.026207
P13807	GYS1	0					-0.132391	-0.0375178	-0.171591	-0.113833	-0.0211786	0.0132969	-0.208661	-0.0721809
Q9NZN4	EHD2	0					0.0464504	0.125825	0.166996	0.11309	-0.0423526	0.0130157	-0.0335817	-0.0209729
Q9NRL3	STRN4	0	+				-0.0209445	0.117666	-0.00381859	0.0309676	0.150278	0.181594	-0.061939	0.0899776
Q9H9Y6	POLR1B	0					-0.0187479	-0.0592712	0.097454	0.00647829	-0.0295232	-0.070953	0.0585994	-0.013959
P54920	NAPA	0					-0.226456	0.0427749	-0.0728359	-0.0855055	-0.19509	-0.109043	-0.00916425	-0.104432
O75530	EED	0					0.0885767	-0.0010339	0.0511694	0.0462374	-0.0716217	-0.070555	-0.0600232	-0.0674
P30043	BLVRB	0					-0.0454559	0.457928	0.155167	0.189213	0.351619	0.511829	0.291425	0.384958
O60885	BRD4	0					0.284644	-0.062865	0.073765	0.0985147	0.0667692	-0.00194911	-0.0253575	0.0131542
Q6UWB1	IL27RA	1	+				0.147465	-0.0205387	0.190577	0.105834	0.0135271	0.243698	-0.704166	-0.14898
Q9NVP2	ASF1B	0					-0.410636	-0.086801	-0.350904	-0.28278	-0.141359	-0.140477	-0.160121	-0.147319
A1L0T0	ILVBL	1	+				-0.0450013	-0.270042	-0.106288	-0.140444	-0.142109	-0.136046	-0.0661449	-0.114767
Q9Y421	FAM32A	0					-0.203126	-0.0660795	-0.0404748	-0.103227	0.116988	-0.0336005	-0.0433117	0.0133587
O95402	MED26	0					-0.000703064	-0.239048	-0.178577	-0.139442	-0.00980547	-0.231697	-0.115313	-0.118939
Q9P000	COMMD9	0					-0.198742	-0.0822898	-0.225014	-0.168682	-0.297319	-0.0870447	-0.187289	-0.190551
O75061	DNAJC6	0					-0.156357	-0.0149198	-0.139558	-0.103611	-0.206354	0.365742	0.0186398	0.0593426
Q9BZH6	WDR11	1	+				0.382916	0.107045	0.0778129	0.189258	0.0961368	0.190676	0.15224	0.146351
Q9H0J9	PARP12	0					0.295679	0.141854	0.103318	0.180284	0.117775	0.252817	0.203589	0.191394
Q96C86	DCPS	0					-0.450378	-0.197034	-0.418916	-0.355443	-0.0905179	-0.0607037	-0.2781	-0.143107
Q9C0D5	TANC1	0					-0.00643202	0.139147	0.101072	0.077929	-0.0272891	0.314424	0.143869	0.143668
Q9NRX1	PNO1	0					0.0935704	0.00518078	-0.00179929	0.0323173	0.0285548	-0.161557	-0.215447	-0.11615
Q53T94	TAF1B	0					-0.114639	-0.647332	1.81676	0.351598	0.127811	0.92857	-0.114452	0.313976
Q15005	SPCS2	2	+				0.272135	0.106766	0.246881	0.208594	0.131097	0.154917	0.237117	0.174377
Q96DI7	SNRNP40	0	+				0.0818624	-0.0961445	-0.0418744	-0.0187188	-0.0779153	-0.152686	-0.0620666	-0.0975558
O75937	DNAJC8	0					-0.169443	-0.02956	-0.168924	-0.122643	-0.0872069	-0.0407966	-0.165239	-0.0977476
Q9BV79	MECR	0					-0.233351	-0.628138	-0.253153	-0.371547	-0.502342	0.0460061	-0.105316	-0.187217
Q7Z460	CLASP1	0					-0.080351	0.0604623	-0.0946452	-0.038178	0.0268655	0.0382596	-0.0536186	0.0038355
O75063	FAM20B	1					-0.155094	-0.271542	-0.100798	-0.175811	-0.348648	-0.338137	-0.262524	-0.316436
Q8N5C6	SRBD1	0					0.0692645	-0.299754	-0.00912704	-0.0798722	0.0428869	-0.120751	-0.00319416	-0.0270195
Q8N3X1	FNBP4	0					0.111313	-0.045056	0.129469	0.0652418	0.128717	-0.0151068	0.0409465	0.0515189
O75489	NDUFS3	0					0.0593382	-0.0898413	-0.0253916	-0.0186316	-0.116926	-0.0829729	0.0527833	-0.0490386
Q9UQN3	CHMP2B	0					0.0135421	0.222356	0.014302	0.0834	0.0821455	0.288719	0.116384	0.162416
Q9P2K8	EIF2AK4	0					-0.131642	0.255293	-0.163378	-0.0132422	0.105689	0.133591	0.116658	0.118646
Q9H967	WDR76	0					0.165361	-0.105548	0.0254453	0.0284195	0.113399	0.0231736	-0.027712	0.0362868
Q12888	TP53BP1	0					-0.0107429	-0.171892	0.0679121	-0.0382408	-0.106382	-0.178891	0.0108328	-0.0914803
Q9H2Y7	ZNF106	0					0.128378	-0.025374	0.0428792	0.0486279	-0.118454	-0.240686	-0.0759113	-0.145017
P22059	OSBP	0					-0.0776879	0.221316	-0.0172484	0.0421264	0.179185	0.332714	0.0768926	0.196264
Q9Y3E7	CHMP3	0					-0.289858	0.111507	-0.205443	-0.127931	-0.406363	0.06423	-0.0477011	-0.129945
O95602	POLR1A	0					0.0716029	0.00245846	0.0370621	0.0370412	-0.0532734	-0.0700243	-0.0537469	-0.0590149
Q9BV40	VAMP8	1	+				0.0568976	-0.20894	0.0293769	-0.0408884	-0.140983	-0.0441787	-0.0387793	-0.0746469
Q9NZ43	USE1	1	+				-0.412926	-0.314592	-0.0666277	-0.264715	-0.322052	-0.132873	-0.294271	-0.249732
O75886	STAM2	0					-0.0178221	-0.0615029	-0.0333718	-0.0375656	0.299576	0.27148	0.247455	0.272837
O43815	STRN	0					-0.132712	0.00998952	0.0997303	-0.00766389	-0.0947914	-0.117287	-0.0629598	-0.0916795
Q9Y5Q9	GTF3C3	0					0.059216	-0.0552951	0.117459	0.04046	0.0366058	-0.0421505	-0.016691	-0.00741192
O75879	GATB	0					-0.0564303	-0.103263	-0.061872	-0.0738551	-0.103975	-0.17223	0.0733836	-0.067607
Q96CW6	SLC7A6OS	0					0.000468921	0.184795	-0.0690488	0.0387383	-0.220023	-0.026505	-0.253387	-0.166638
P49711	CTCF	0					0.315554	-0.0849738	0.0390512	0.0898773	0.0831326	-0.0812619	0.0225593	0.00814332
P48444	ARCN1	0	+				-0.0287784	0.138435	0.0620292	0.0572285	0.156152	0.227377	0.160213	0.181247
P22681	CBL	0					-0.25345	0.157054	-0.250129	-0.115508	0.0514476	0.135151	-0.262079	-0.0251602
P43121	MCAM	1	+				0.127738	0.0154676	0.198268	0.113824	-0.0257639	0.114129	0.183704	0.0906897
P35052	GPC1	0	+				-0.0513493	-0.000775506	0.076583	0.00815275	0.0925986	0.0838675	0.122375	0.0996138
P23497	SP100	0					-0.278404	0.115423	0.017006	-0.0486582	-0.178621	0.00768329	0.035201	-0.0452457
Q8IXB1	DNAJC10	0	+				0.195108	0.0708807	0.350518	0.205502	0.232943	0.210707	0.233744	0.225798
Q9GZU1	MCOLN1	6	+				0.379588	1.01717	-0.955495	0.147087	0.587305	-1.43937	0.12448	-0.242528
Q9NPR9	GPR108	7	+				-0.233551	0.0128564	-0.0284881	-0.0830608	-0.068662	0.000278757	0.016482	-0.0173004
P23229	ITGA6	1	+				0.0192324	-0.119182	-0.0540483	-0.0513326	-0.0768354	-0.142498	-0.00982608	-0.0763864
O14929	HAT1	0					-0.364678	-0.059023	-0.293163	-0.238955	-0.165846	-0.034417	-0.165833	-0.122032
Q14566	MCM6	0					-0.0505574	-0.0591471	-0.0423408	-0.0506818	-0.0898368	-0.085995	-0.0829728	-0.0862682
Q15042	RAB3GAP1	0					-0.0855518	0.111228	-0.0575288	-0.0106176	0.181298	0.216361	0.108289	0.168649
P14868	DARS	0					0.0105874	-0.00953555	0.0159654	0.0056724	-0.0406419	-0.0256841	0.0277113	-0.0128716
O00116	AGPS	0	+				0.0894492	-0.00232527	0.0967753	0.0612997	-0.0744769	-0.034961	0.0111013	-0.0327789
P36551	CPOX	0					-0.0231377	-0.143848	-0.0844773	-0.083821	-0.291238	-0.272293	-0.191379	-0.251637
Q969V5	MUL1	2					0.0284072	-0.11274	0.044505	-0.0132758	0.0529509	-0.185889	-0.0853609	-0.0727664
P47756	CAPZB	0					-0.0364556	0.0931869	0.0662058	0.040979	0.0240194	0.0816248	0.0224239	0.0426894
Q06203	PPAT	0					-0.27337	0.102457	-0.197257	-0.122723	-0.0478736	0.00432558	-0.170695	-0.0714142
Q8NC60	NOA1	0					0.0743151	-0.162104	-0.0387566	-0.0421817	-0.227208	-0.105422	-0.120225	-0.150951
P49841	GSK3B	0					-0.0203667	0.170581	0.00840896	0.0528745	0.156267	0.267483	0.102985	0.175578
Q9H2J4	PDCL3	0					-0.132818	0.1637	-0.0883694	-0.0191625	-0.0193405	-0.0515913	-0.0956221	-0.055518
O14530	TXNDC9	0					-0.241405	0.0894683	-0.163806	-0.105248	-0.0264759	-0.0384924	-0.164764	-0.0765774
Q9BS40	LXN	0					-0.0793528	0.170887	0.0508497	0.0474613	0.14844	0.353728	-0.00531967	0.165616
Q9H3U5	MFSD1	11	+				-0.076021	-5.26204	0.16175	-1.72544	0.144772	0.265589	0.104703	0.171688
Q9Y2X3	NOP58	0					0.277665	-0.0567874	0.0825802	0.101153	0.114295	-0.0163471	0.00640964	0.0347859
Q9P270	SLAIN2	0					-0.331717	0.266866	-0.0436556	-0.0361687	-0.335904	0.148401	-0.0901252	-0.0925428
Q9UII4	HERC5	0	+				0.16431	0.283828	0.315594	0.254577	0.59209	0.417166	0.399541	0.469599
Q9BT78	COPS4	0					-0.211046	0.00829799	-0.100542	-0.101097	-0.0311459	0.0197797	-0.0290186	-0.0134616
Q9Y6N8	CDH10	1	+				0.289077	0.101347	0.263477	0.217967	0.132118	0.168835	0.240025	0.180326
Q15291	RBBP5	0					0.0250642	-0.152714	-0.106001	-0.0778837	-0.0782095	-0.0175865	0.0203955	-0.0251335
Q16763	UBE2S	0					-0.00526478	0.16033	-0.0242456	0.0436065	0.180006	0.167458	-0.213036	0.0448095
O75781	PALM	0					0.211979	0.0311028	-0.0598501	0.0610772	-0.103108	-0.176551	-0.0700849	-0.116581
P20933	AGA	0	+				-0.0292378	-0.36224	-0.671137	-0.354205	-0.506795	-0.828986	-0.473078	-0.602953
P56524	HDAC4	0					-0.467009	-0.391609	-0.174116	-0.344245	-0.342208	-0.262338	-0.388989	-0.331178
O43242	PSMD3	0					-0.017359	0.0887805	0.0445229	0.0386481	0.12985	0.139794	0.0788614	0.116168
O15234	CASC3	0					0.0296034	-0.226726	-0.0366018	-0.0779082	0.24002	-0.0410675	0.0104301	0.0697942
Q14CZ7	FASTKD3	0					0.0310397	-0.21441	-0.141689	-0.108353	-0.132882	-0.219782	-0.220373	-0.191013
Q08J23	NSUN2	0					-0.224852	-0.174643	-0.200349	-0.199948	-0.21664	-0.163051	-0.182131	-0.187274
Q9NUQ7	UFSP2	0					-0.0068987	0.106766	0.0353564	0.0450746	0.270303	0.140086	0.0115042	0.140631
P27708	CAD	0					0.00928908	0.29557	0.150611	0.151823	0.255885	0.338991	0.163627	0.252834
P61026	RAB10	0					0.0578734	-0.00516208	0.0911755	0.0479623	-0.0443627	0.0487415	0.0301583	0.0115123
P15408	FOSL2	0					0.590758	0.33921	0.372258	0.434076	0.0937033	0.123539	0.22083	0.146024
P05362	ICAM1	1	+			+	0.580258	0.45477	0.564456	0.533162	0.559183	0.573065	0.693223	0.60849
P12429	ANXA3	0				+	0.270296	0.742449	0.539869	0.517538	0.690612	0.82829	0.692211	0.737038
Q9NS91	RAD18	0					0.0112959	-0.0760483	-0.138717	-0.0678232	-0.0976011	-0.0710857	-0.156778	-0.108488
P31040	SDHA	0					0.0381224	-0.135398	0.027436	-0.0232799	-0.102336	-0.139086	-0.0879958	-0.109806
O75340	PDCD6	0					-0.0159688	-0.0150477	-0.054296	-0.0284375	-0.0650036	-0.103218	-0.0852353	-0.0844858
Q9P209	CEP72	0					0.132099	0.0120739	-0.27995	-0.045259	-0.336478	-0.135793	-0.455599	-0.30929
Q9HAV7	GRPEL1	0					0.108277	0.00479155	0.103152	0.0720736	0.0813783	0.0352584	0.083654	0.0667635
Q9H0V9	LMAN2L	1	+				-0.187979	-0.0766614	0.0466994	-0.0726469	-0.286151	0.126182	0.132169	-0.0092665
Q709F0	ACAD11	0					-0.11637	-0.265424	0.110093	-0.0905668	-0.138727	0.223061	0.100983	0.0617724
Q9UKY7	CDV3	0					0.0153177	0.195118	0.0250263	0.0784875	0.248484	0.18834	0.0961325	0.177652
P09001	MRPL3	0					0.0610489	-0.203561	-0.0731944	-0.071902	-0.233211	-0.296884	-0.0295407	-0.186546
Q86SF2	GALNT7	1					-0.0123707	-0.184461	-0.097725	-0.0981854	-0.196536	-0.196749	-0.164289	-0.185858
P49736	MCM2	0					-0.00608198	-0.115248	-0.0493832	-0.0569045	-0.0212805	-0.147286	-0.122307	-0.0969581
P51149	RAB7A	0					0.0720956	0.0193934	0.0735305	0.0550065	-0.0121693	0.0241651	0.0860562	0.032684
Q96KR1	ZFR	0					0.182949	0.0532002	0.124694	0.120281	0.0211789	0.0128751	0.107141	0.0470649
Q9H4A6	GOLPH3	0					-0.0640743	-0.0893553	-0.022761	-0.0587302	-0.0761479	-0.0245888	-0.0458953	-0.0488773
P20585	MSH3	0	+				-0.0692224	-0.0606354	-0.0832477	-0.0710352	-0.15807	-0.14565	-0.178015	-0.160578
Q96J01	THOC3	0					-0.0267088	0.0136393	0.111075	0.0326683	-0.0225048	-0.10581	-0.0100907	-0.0461351
Q9NW82	WDR70	0					-0.144636	-0.0122301	-0.155302	-0.104056	-0.10965	0.0114702	-0.16179	-0.0866563
Q9BQI6	SLF1	0	+				-0.0393098	-0.174643	-0.136691	-0.116881	-0.244883	0.226562	0.355236	0.112305
Q02224	CENPE	0					-0.138047	0.0461082	-0.0246501	-0.0388629	0.0887388	0.0738026	-0.142727	0.00660488
Q07075	ENPEP	1					-0.891091	-2.21944	-0.318959	-1.14316	-0.861968	-0.308744	-0.532502	-0.567738
O43252	PAPSS1	0					-0.252762	-0.0528045	-0.117695	-0.141087	0.139514	0.0553715	-0.118999	0.0252957
Q9H089	LSG1	0					0.13287	-0.0267707	0.0405317	0.0488768	-0.0336774	0.00558378	0.00133294	-0.00892025
Q8WW12	PCNP	0					-0.131963	0.0742795	-0.153838	-0.0705072	0.0434204	0.0884674	-0.172469	-0.0135271
Q9P2N5	AC091959.3	0					0.153449	-0.0766614	0.0653264	0.0473714	0.0573627	-0.0251365	0.0019998	0.0114086
Q96EA4	SPDL1	0					-0.428425	-0.411575	-0.383734	-0.407911	-0.287679	-0.23809	-0.241828	-0.255866
Q9NP58	ABCB6	10	+				0.030441	0.0549452	0.173846	0.0864108	0.259228	0.146595	0.24316	0.216328
Q9UHB7	AFF4	0					0.365114	0.0171673	0.0952542	0.159178	0.155229	0.0185091	0.15473	0.109489
Q14999	CUL7	0					-0.25345	0.10107	-0.53316	-0.228514	0.161239	-0.135539	-0.452389	-0.14223
Q9H944	MED20	0					-0.135488	-0.153876	-0.228618	-0.172661	-0.386694	-0.08652	-0.214414	-0.229209
Q9HAV4	XPO5	0					-0.250498	-0.00657852	-0.137128	-0.131401	-0.124737	-0.0530693	-0.181779	-0.119862
P20839	IMPDH1	0					-0.125101	0.204175	0.0206887	0.0332543	0.124985	0.178373	0.025133	0.109497
Q9Y5L0	TNPO3	0					-0.113989	0.13815	-0.0636614	-0.0131668	0.00321421	0.0758131	-0.0311062	0.0159737
P31937	HIBADH	0					0.18548	0.0142919	0.119618	0.106463	-0.0132987	-0.0163471	0.149903	0.0400856
P06746	POLB	0					0.175915	-0.0535521	-0.0940671	0.00943186	-0.280705	0.0790913	0.143854	-0.0192531
O60934	NBN	0					0.18628	-0.00413117	0.145993	0.109381	0.0799544	0.0272853	0.0914404	0.0662267
P50995	ANXA11	0					-0.0627283	0.00401347	-0.116399	-0.0583712	-0.0406419	0.162225	0.0648572	0.0621469
P30044	PRDX5	0					0.0483883	0.164309	0.0764744	0.0963905	0.107585	0.227801	0.093287	0.142891
Q14181	POLA2	0					-0.0807944	0.12879	0.0589716	0.0356558	0.000725241	-0.0783618	-0.0628323	-0.0468229
Q9H3S7	PTPN23	0					-0.0395379	0.236056	0.0100138	0.0688438	0.12442	0.243253	0.165075	0.177583
Q15024	EXOSC7	0					-0.0747975	-0.119896	-0.0124798	-0.0690578	-0.0468712	-0.156316	-0.0951232	-0.0994367
Q12770	SCAP	8	+				-0.190754	-0.571584	-0.331549	-0.364629	-0.353763	-0.259896	-0.15175	-0.255136
O15440	ABCC5	13	+				-0.131535	-0.196357	0.192456	-0.0451453	-0.303962	-0.295523	-0.244417	-0.281301
Q96RQ3	MCCC1	0					0.228912	0.032689	0.279288	0.180296	0.199378	-0.00611713	0.126718	0.10666
Q9UJS0	SLC25A13	6					0.0463294	-0.102661	0.048507	-0.00260821	-0.136279	-0.1382	-0.067417	-0.113965
Q5H9R7	PPP6R3	0					-0.149399	0.0407787	-0.165795	-0.0914716	-0.00805559	-0.000835562	-0.12512	-0.0446703
Q13488	TCIRG1	8	+				0.217283	-1.61566	-0.750737	-0.716372	-1.11597	0.563315	-0.645667	-0.399441
Q9NQW6	ANLN	0					0.316897	0.086857	0.118408	0.174054	0.138032	0.161337	0.183401	0.160923
Q15056	EIF4H	0					-0.183032	0.113884	-0.101709	-0.0569524	0.00601954	0.063429	-0.014846	0.0182008
O43709	BUD23	0					-0.205669	-0.451453	-0.292604	-0.316575	-0.0989554	-0.28995	-0.348856	-0.24592
P24752	ACAT1	0					-0.0263636	-0.230478	-0.0876596	-0.114834	-0.146514	-0.138833	-0.0568243	-0.114057
P54278	PMS2	0					-0.173294	-0.256902	-0.21132	-0.213839	-0.224285	-0.136046	-0.173651	-0.177994
Q7L5D6	GET4	0					-0.327893	-0.116084	-0.0883047	-0.177427	-0.178255	-0.134651	-0.355223	-0.22271
Q14534	SQLE	4	+			+	1.15295	1.02836	1.36909	1.18347	0.87217	0.974097	0.9059	0.917389
O00443	PIK3C2A	0					-0.125746	-0.177961	-0.0236047	-0.109104	-0.243309	-0.125229	-0.124142	-0.164227
P14735	IDE	0					-0.128429	0.147285	0.0123292	0.010395	0.0656848	0.133744	0.0386181	0.079349
P78332	RBM6	0					0.223565	-0.0109476	0.0679301	0.0935158	0.0220201	0.0183678	0.0887459	0.0430446
Q12893	TMEM115	4	+				0.151625	0.174749	0.0459557	0.12411	0.25181	0.356116	0.703644	0.43719
Q9NWU2	GID8	0					0.00410814	0.0650533	-0.283757	-0.071532	-0.298498	-0.0948932	-0.069577	-0.154323
O94906	PRPF6	0					0.0291248	-0.0723643	0.0153761	-0.0092878	-0.0440613	-0.111624	-0.00982608	-0.0551706
Q9Y3I1	FBXO7	0					-0.222041	-0.047435	-0.293303	-0.187593	-0.0984719	-0.337807	-0.0761641	-0.170814
P49770	EIF2B2	0					-0.122304	0.0723752	0.0331091	-0.00560668	-0.0130933	0.0240233	-0.0541319	-0.0144006
Q9UDX5	AC004832.3	3					0.243685	0.0923597	0.164573	0.166872	0.105243	0.312053	0.277889	0.231728
Q9HBE1	PATZ1	0					0.00976114	-0.275713	-0.124632	-0.130195	-0.138068	-0.285156	0.067368	-0.118619
Q6ZN18	AEBP2	0					-0.118098	-0.353867	-0.264902	-0.245623	-0.414312	-0.00639471	-0.0859887	-0.168899
Q9HBU6	ETNK1	0					0.0343967	0.0184765	0.00556613	0.0194798	-0.141452	-0.31872	-0.233126	-0.231099
Q16795	NDUFA9	0					0.00952505	-0.176132	-0.084736	-0.0837809	-0.199696	-0.221695	-0.155343	-0.192245
P50542	PEX5	0					0.0741918	0.210983	-0.115418	0.0565857	0.127019	0.0854929	-0.0745202	0.0459973
Q16630	CPSF6	0					0.214425	0.00492131	0.136425	0.11859	0.151658	0.0109085	0.101841	0.0881357
Q6ZXV5	TMTC3	9	+				-0.211856	-0.427332	-0.148465	-0.262551	-0.287255	-0.327074	-0.279967	-0.298098
P42166	TMPO	0					-0.0184008	-0.104225	-0.0213765	-0.0480009	-0.0962453	-0.0956758	-0.0149779	-0.0689663
P62306	SNRPF	0					0.0625169	-0.00322854	0.00422424	0.0211709	-0.0217908	-0.0437732	-0.0243098	-0.0299579
P24941	CDK2	0					-0.143893	0.114023	-0.14605	-0.0586397	-0.0406419	0.0311238	-0.00691183	-0.00547664
Q15633	TARBP2	0					-0.141345	0.0385195	-0.107387	-0.0700707	-0.0905179	0.0742427	-0.0135267	-0.00993394
Q8TAQ2	SMARCC2	0					0.143187	-0.06336	0.083143	0.0543234	0.0637351	-0.0629729	-0.0180075	-0.00574843
Q9HB07	C12orf10	0					-0.100934	0.265452	-0.0957688	0.0229163	0.0555317	0.10213	-0.0578488	0.0332711
Q8NB46	ANKRD52	0					0.00740289	-0.29101	-0.213274	-0.165627	-0.222422	0.000418201	-0.111618	-0.111207
A3KN83	SBNO1	0					-0.349672	-0.0301932	-0.23676	-0.205542	-0.258539	-0.191513	-0.243292	-0.231115
Q96AX1	VPS33A	0					0.018045	-0.0593952	-0.023436	-0.0215954	-0.0752635	-0.127781	-0.0446041	-0.0825497
Q9HBH0	RHOF	0					0.113847	0.00323566	0.100796	0.0726264	0.0114378	-0.0218467	0.117265	0.0356186
Q9NX57	RAB20	0					0.13197	0.135733	-0.0541474	0.0711854	-0.166492	-0.15769	-0.277001	-0.200394
Q86U38	NOP9	0					0.163391	-0.0917836	-0.0375542	0.011351	-0.104457	-0.136046	-0.179898	-0.140134
Q8WXE9	STON2	0	+				-0.35948	-0.153993	-0.0238746	-0.179116	-0.122074	0.122325	0.142501	0.0475837
Q15643	TRIP11	0					0.206424	0.118227	0.310949	0.211867	0.220461	0.220478	0.274147	0.238362
P55081	MFAP1	0					0.108656	-0.0562901	0.0592931	0.0372198	0.0712234	-0.0146932	0.0373871	0.0313058
Q00796	SORD	0					-0.255023	0.100099	-0.187473	-0.114132	-0.115398	-0.00736527	-0.221288	-0.114684
Q8IV50	LYSMD2	0					-0.162129	0.137155	-0.15541	-0.0601281	0.223239	0.160543	-0.239685	0.048032
O14975	SLC27A2	3	+				0.239666	0.145425	0.365991	0.250361	0.196764	0.295834	0.347231	0.279943
P37108	SRP14	0	+				0.0029331	-0.0426731	0.103502	0.0212539	-0.0715231	-0.00194911	0.0917245	0.00608408
P29590	PML	0					0.166808	0.176472	0.175355	0.172878	0.406433	0.368474	0.427742	0.400883
P06865	HEXA	0	+				-0.277727	-0.353665	-0.291623	-0.307672	-0.416952	-0.507352	-0.449855	-0.458053
O15127	SCAMP2	4	+				0.12697	0.0886432	0.182674	0.132762	-0.113867	-0.0222584	0.10987	-0.0087518
P46940	IQGAP1	0					-0.110845	0.0386525	0.0131768	-0.0196718	-0.0209744	0.0487415	0.0298861	0.0192177
Q7Z2Z2	EFL1	0					-0.0564303	0.185941	0.0705745	0.0666952	0.210839	0.130126	0.119449	0.153471
O15305	PMM2	0					-0.211451	0.255941	-0.103721	-0.0197437	0.182002	0.187817	0.00815041	0.12599
Q01850	CDR2	0					0.519555	0.128649	-0.0220182	0.208728	0.271052	0.254295	0.115907	0.213751
Q92620	DHX38	0					0.08534	-0.111663	-0.0590275	-0.0284503	0.00394093	-0.12152	-0.110878	-0.0761524
Q15911	ZFHX3	0					0.467107	0.269747	0.15746	0.298105	-0.0773263	-0.0152447	0.174938	0.0274558
O96000	NDUFB10	0					-0.00759839	-0.198387	-0.0962822	-0.100756	-0.226942	-0.25126	-0.185884	-0.221362
P34059	GALNS	0	+				-0.345896	-0.608515	-0.473777	-0.476062	-0.580606	0.00642333	-0.395588	-0.323257
Q9UQ90	SPG7	2	+				0.289507	0.00790806	0.0918697	0.129761	-0.0177044	-0.0449892	0.06249	-6.78667e-05
Q9NWA0	MED9	0					0.559554	-0.302378	-0.237008	0.00672307	0.971208	-0.0193746	0.0218827	0.324572
O75376	NCOR1	0					0.0292444	-0.105428	-0.13435	-0.0701777	-0.0967297	-0.15093	-0.0267969	-0.0914855
Q9UNS2	COPS3	0					-0.0573318	0.0254334	-0.0131255	-0.0150079	0.00726805	0.0669417	0.00707895	0.0270962
Q9ULX3	NOB1	0					-0.0771325	0.0783688	-0.188045	-0.0622695	0.00633156	0.00474493	-0.163575	-0.0508328
O60256	PRPSAP2	0					-0.141876	0.278549	0.0683076	0.0683268	0.252674	0.131041	-0.0767959	0.102306
Q9BUM1	G6PC3	9	+				-0.10802	-0.251916	-0.265045	-0.208327	-0.0621295	-0.126506	-0.507601	-0.232079
Q9Y4W6	AFG3L2	2					-0.0156208	-0.128673	0.0159307	-0.0427879	-0.102433	-0.180982	-0.114083	-0.132499
O14732	IMPA2	0					-0.114747	0.26861	-0.0970359	0.0189423	0.0740552	0.215455	0.133162	0.140891
Q10472	GALNT1	1	+				0.0161472	-0.0257551	-0.0370864	-0.0155648	-0.0447643	-0.0501119	-0.145379	-0.0800852
Q96DM3	C18orf8	0					0.233728	0.0643773	0.16129	0.153132	0.168786	0.184029	0.451668	0.268161
O15118	NPC1	13	+				0.310327	0.140998	0.158857	0.203394	0.192616	0.220186	0.211281	0.208028
P35580	MYH10	0					-0.0820128	-0.117276	0.0123985	-0.0622968	-0.151278	-0.00139253	-0.0966194	-0.0830966
P38919	EIF4A3	0					-0.122842	-0.0470596	-0.0449858	-0.0716293	-0.13477	-0.0866511	-0.0912513	-0.104224
Q9HA64	FN3KRP	0					-0.13975	0.153455	-0.135942	-0.0407459	0.217808	0.15188	0.0286624	0.132783
Q6PJ69	TRIM65	0					-0.188801	-1.13009	-0.234459	-0.517784	-0.0721143	0.38794	0.226867	0.180898
Q9HC52	CBX8	0					0.128122	0.0191312	0.0365343	0.0612627	0.0810496	0.012313	0.119434	0.0709323
O00257	CBX4	0					0.206153	0.0103801	0.213038	0.14319	0.232335	0.111116	0.0119071	0.118453
Q7RTS9	DYM	0	+				-0.180758	-0.0392803	0.0835426	-0.0454987	0.0719852	-0.0444489	0.0483676	0.0253013
P83876	TXNL4A	0					-0.174125	-0.270578	-0.00522008	-0.149974	-0.106479	-0.130457	-0.109273	-0.115403
O43823	AKAP8	0					0.206289	0.00894831	0.158933	0.124723	0.122277	0.0474451	0.113037	0.0942529
P17858	PFKL	0					-0.292923	0.0809647	-0.12975	-0.113903	0.0011398	0.0655269	-0.074014	-0.0024491
Q99961	SH3GL1	0					-0.26968	0.170785	-0.0571004	-0.0519986	0.0633021	0.118524	-0.069323	0.0375009
Q96F63	CCDC97	0					-0.0101611	-0.0202838	-0.186599	-0.072348	-0.126635	-0.328295	-0.160121	-0.205017
P00441	SOD1	0					-0.11453	0.426521	0.032653	0.114881	0.133708	0.230251	0.0408094	0.134923
Q9UBE0	SAE1	0					-0.34912	0.0462416	-0.297774	-0.200217	-0.0750668	0.0432756	-0.208776	-0.0801891
O43379	WDR62	0					-0.0128356	0.309938	0.236299	0.177801	0.0571471	0.242396	0.0696033	0.123049
Q9BSF4	TIMM29	1					0.0671755	-0.154574	-0.0263684	-0.0379222	-0.0804641	-0.107621	-0.117894	-0.101993
Q9BQ95	ECSIT	0					0.0802507	-0.113457	0.0279428	-0.00175447	-0.0235241	-0.0462041	-0.156659	-0.0754623
O43615	TIMM44	0					0.141377	0.0658649	0.14869	0.118644	0.0612476	0.0268594	0.0941402	0.0607491
P28072	PSMB6	0					-0.177135	0.214744	0.00510143	0.0142369	0.0335282	0.126851	0.0715622	0.0773139
P62280	RPS11	0					-0.0363414	-0.093481	-0.0576277	-0.0624834	-0.057758	-0.070157	-0.0747732	-0.0675627
Q96D15	RCN3	0	+				-0.00128873	-0.274431	-0.132552	-0.136091	0.0731832	-0.182088	-0.0314975	-0.0468006
P52209	PGD	0					-0.185404	0.257748	-0.0502613	0.00736105	0.146834	0.238068	0.127446	0.170782
Q9P2B4	CTTNBP2NL	0					-0.172878	0.126671	0.0639097	0.00590095	0.0697008	0.161026	0.188692	0.139806
P28066	PSMA5	0					-0.137194	0.170523	0.00118362	0.0115041	0.0565008	0.151075	0.0479541	0.0851765
Q9HCU4	CELSR2	7	+				-0.69559	-0.94586	-0.380709	-0.674053	-0.661863	-0.763443	-0.28599	-0.570432
Q92733	PRCC	0					-0.0511232	-0.0274051	0.0178216	-0.0202356	-0.129099	-0.0288286	-0.0376113	-0.0651798
Q86TP1	PRUNE1	0					-0.561448	-0.0526798	-0.507819	-0.373982	-0.208776	-0.197235	-0.516012	-0.307341
Q15427	SF3B4	0					0.0967004	-0.0281661	0.0463807	0.038305	0.0224408	0.0148446	0.00895463	0.0154133
Q9P2M7	CGN	0					-0.27966	0.068303	-0.404221	-0.205192	-0.626141	-0.489303	-0.626636	-0.580693
P31949	S100A11	0					0.173666	0.381228	0.206771	0.253888	0.202354	0.382426	0.364795	0.316525
Q99755	PIP5K1A	0					0.371741	0.195696	0.332356	0.299931	0.240387	0.253298	0.316459	0.270048
Q9H4A5	GOLPH3L	0					-0.0499915	0.262471	0.243264	0.151914	0.196764	0.416961	0.494631	0.369452
P41214	EIF2D	0					-0.244178	-0.0699029	-0.0777506	-0.130611	-0.14642	0.105364	-0.127805	-0.0562871
Q13444	ADAM15	1	+				-0.108564	-0.24375	-0.418916	-0.257077	-0.671714	-0.344077	-0.245766	-0.420519
	TPM3						-0.120904	0.0883682	0.0594541	0.00897285	0.0870876	0.174438	-0.0218184	0.0799023
P24666	ACP1	0					-0.315985	0.233317	-0.0250715	-0.0359132	0.0554241	0.192538	0.0254042	0.091122
Q6IQ49	SDE2	0					-0.155094	-0.0696565	-0.121136	-0.115296	-0.0976979	-0.076381	-0.0675442	-0.080541
Q9BU76	C1orf35	0					0.243685	-0.0425477	0.0428615	0.0813329	-0.0887658	0.0523199	0.0679265	0.0104935
Q96BM9	ARL8A	0					0.203721	0.0422423	0.0742522	0.106739	0.0973551	0.136559	0.125671	0.119862
P62745	RHOB	0					-0.385913	-0.209611	-0.116383	-0.237302	-0.0485745	0.159795	0.139386	0.0835356
P62308	SNRPG	0					0.0481459	-0.0192636	0.0250263	0.0179695	0.11609	-0.015796	0.0813966	0.0605636
P82675	MRPS5	0					0.220967	0.0247756	0.139935	0.128559	0.0292945	-0.0724114	0.00734676	-0.0119234
Q9Y3C4	TPRKB	0					-0.184476	0.086857	-0.211157	-0.102925	-0.0541715	0.000557632	0.0401243	-0.00449652
O75319	DUSP11	0					0.369892	-0.409143	0.0524667	0.00440534	-0.166676	0.0438502	0.17327	0.0168146
Q8WUM9	SLC20A1	10	+				0.425145	0.28556	0.554601	0.421769	0.423	0.414583	0.623416	0.487
Q92575	UBXN4	0	+				0.100465	0.000387941	0.3001	0.133651	-0.0271876	-0.059902	0.143707	0.0188724
O15514	POLR2D	0					-0.0485189	-0.0449308	0.156046	0.0208653	-0.0999222	-0.144768	-0.183305	-0.142665
Q9ULA0	DNPEP	0					-0.0218682	0.116824	0.0298495	0.0416019	0.108813	0.0679491	-0.118385	0.0194589
Q9Y6G9	DYNC1LI1	0					-0.0436374	0.239837	0	0.0653998	0.288276	0.260557	0.093287	0.21404
O75915	ARL6IP5	4	+				-0.0225608	-0.0952975	-0.0120037	-0.0432873	-0.144454	-0.107104	-0.0479589	-0.099839
Q9Y2B0	CNPY2	0	+				-0.0479522	-0.0658325	0.0444697	-0.023105	-0.0369115	0.03483	0.048092	0.0153369
Q9NUJ1	ABHD10	0					0.0407727	-0.0748214	0.0336705	-0.00012607	0.000310739	-0.0968488	0.0472657	-0.0164241
Q5HYI8	RABL3	0					-0.049765	-0.0521812	-0.0565236	-0.0528232	-0.154445	-0.0041736	0.112604	-0.0153381
P38606	ATP6V1A	0					-0.244376	0.0541396	-0.122318	-0.104185	-0.0391308	-0.0475528	-0.143933	-0.0768722
Q13144	EIF2B5	0					-0.237433	-0.21084	-0.185061	-0.211112	-0.108593	0.00726309	-0.237653	-0.112994
Q03188	CENPC	0					0.0869574	-0.0600154	-0.0271763	-7.81033e-05	0.187889	0.0287059	-0.148869	0.0225754
Q9UHY7	ENOPH1	0					-0.384028	0.136302	-0.174055	-0.140594	0.0744913	0.00670308	-0.178839	-0.0325482
Q8N5K1	CISD2	1	+				0.227814	0.133321	0.278206	0.213113	0.0531657	0.156733	0.223114	0.144338
Q8NB90	SPATA5	0					-0.00117159	0.0722394	0.110167	0.0604117	0.242591	0.148833	0.27376	0.221728
Q8WTS6	SETD7	0					-0.168088	0.181918	0.048507	0.020779	0.0393702	0.191074	0.0849253	0.105123
Q96HR8	NAF1	0					-0.0364556	-0.0735933	-0.206915	-0.105655	-0.155468	-0.116002	-0.119734	-0.130402
O75380	NDUFS6	0					0.125307	-0.192742	-0.0982697	-0.0552349	-0.156584	-0.148041	-0.095248	-0.133291
O60337	2018-03-06	14	+				0.285501	0.128225	0.291911	0.235212	0.0524138	0.323985	0.309706	0.228701
Q9NUU6	FAM105A	0	+				0.243685	0.091533	-0.0129555	0.107421	-0.0428554	-0.0544116	0.0525069	-0.0149201
P61927	RPL37	0					0.0435482	-0.108549	0.106452	0.0138173	-0.0535729	-0.153938	-0.128293	-0.111935
Q13309	SKP2	0					-0.207498	-0.225068	-0.392904	-0.275157	-0.547046	-0.405953	-0.381747	-0.444915
Q99650	OSMR	1	+			+	0.786506	0.341862	0.479216	0.535861	0.769187	0.49304	0.681401	0.647876
Q9BRX2	PELO	0					0.0803745	-0.0440533	0.0260212	0.0207808	0.121713	0.149281	0.132359	0.134451
P20936	RASA1	0					-0.039652	0.0278039	-0.264188	-0.0920122	-0.113388	-1.30621	-0.337829	-0.585809
O95379	TNFAIP8	0					-0.0637381	0.184692	-0.303759	-0.0609351	-0.197621	0.0429886	-0.0271891	-0.060607
Q9Y6G5	COMMD10	0					-0.0894127	0.0441074	-0.128323	-0.0578761	-0.142954	-0.0230813	0.0760496	-0.0299952
Q9NX24	NHP2	0					0.12454	-0.0550463	0.127295	0.0655962	0.026338	0.104226	0.0920083	0.0741907
Q96NC0	ZMAT2	0					0.193231	0.198527	-0.00320277	0.129518	-0.029929	-0.035097	-0.0318884	-0.0323048
Q9BW72	HIGD2A	2	+				0.0433067	-0.561633	-0.275565	-0.26463	-0.262948	-0.303447	-0.177073	-0.247823
P22033	MUT	0					0.148244	-0.0420456	0.0555641	0.053921	0.141341	-0.0188246	0.150864	0.0911265
Q9ULW3	ABT1	0					0.0648444	-0.0601395	0.0843971	0.0297006	-0.0722129	-0.0303301	-0.0765431	-0.0596954
Q8WWQ0	PHIP	0					0.167334	-0.163259	-0.143103	-0.0463424	0.00903872	-0.198572	-0.108285	-0.0992726
Q8IYS1	PM20D2	0					-0.155094	0.275901	-0.0928136	0.00933112	0.0997947	0.170637	-0.0303237	0.0800361
A0FGR8	ESYT2	2	+				-0.0116733	-0.104225	-0.0162146	-0.0440378	-0.0864268	-0.0652384	-0.0519487	-0.0678713
O75223	GGCT	0					-0.24823	0.260084	-0.094035	-0.0273934	0.0664437	0.0719415	-0.0713534	0.0223439
P00533	EGFR	1	+				0.0985817	-0.02512	0.138576	0.0706791	-0.050376	-0.0181368	0.113757	0.0150815
Q96FF9	CDCA5	0					-0.182102	-0.0825339	-0.0204131	-0.0950164	0.0626531	-0.262686	-0.0303237	-0.0767855
P40227	CCT6A	0					-0.338407	-0.06336	-0.164005	-0.188591	-0.27823	-0.179998	-0.228357	-0.228862
Q9BXP2	SLC12A9	12	+				-0.289667	0.109274	0.096922	-0.0278235	0.0520917	0.337917	0.169968	0.186659
Q96H79	ZC3HAV1L	0					-0.372757	0.115984	-0.310273	-0.189015	0.037562	0.0158302	-0.228812	-0.0584731
Q5C9Z4	NOM1	0					0.459577	0.00829799	0.206099	0.224658	0.125776	0.0470132	0.222182	0.131657
P21281	ATP6V1B2	0					-0.146437	0.002329	-0.160328	-0.101478	-0.0974074	0.0224658	-0.134496	-0.0698127
Q9H7D0	DOCK5	0					0.106888	0.0405128	0.0543349	0.0672453	-0.0170906	0.205347	0.0746457	0.0876342
Q9NVT9	ARMC1	0					0.12288	0.0237239	0.0341446	0.0602496	0.225901	0.299738	0.0698831	0.198507
Q9Y2Q9	MRPS28	0					-0.00491442	-0.131627	-0.0502115	-0.0622509	-0.0814433	-0.166034	-0.0301933	-0.0925569
Q6P1N9	TATDN1	0	+				0.196182	0.175902	0.144041	0.172042	0.21817	0.123645	0.0471281	0.129648
Q96PU4	UHRF2	0					0.0398083	0.2749	0.127876	0.147528	0.0345888	0.0960866	0.248959	0.126545
Q99720	SIGMAR1	1	+				-0.0663148	-0.160716	-0.0824707	-0.103167	-0.216908	-0.26547	-0.221631	-0.23467
Q9NZB2	FAM120A	0					-0.0819021	-0.0348701	0.0086849	-0.0360291	-0.0637159	-0.0225328	0.0307025	-0.0185154
Q86WR7	PROSER2	0					0.213066	0.192339	0.329617	0.245007	0.400132	0.403317	0.397908	0.400452
P00367	GLUD1	0					0.209673	0.0465087	0.18503	0.147071	0.119012	0.149977	0.192584	0.153857
Q9P287	BCCIP	0					0.0519076	0.147285	0.0271038	0.075432	-0.0079526	0.0929033	-0.00492141	0.0266764
Q9NUP9	LIN7C	0					-0.0214065	-0.0456825	0.138897	0.0239359	-0.0740834	-0.0234926	0.0656937	-0.0106274
Q53GQ0	HSD17B12	3	+				0.345607	-0.0451814	-0.0121567	0.0960895	-0.127394	-0.0407966	0.0658331	-0.0341191
Q08945	SSRP1	0					-0.0126032	-0.118706	-0.0675607	-0.0662899	-0.0975042	-0.106845	-0.114944	-0.106431
Q9Y320	TMX2	1	+				-0.38007	-0.444724	-0.290082	-0.371625	-0.133827	-0.196992	-0.067417	-0.132745
Q53FT3	HIKESHI	0					-0.0727929	0.432423	0.041961	0.133864	0.178834	0.132797	-0.139827	0.0572676
O94919	ENDOD1	0	+				-0.113989	-0.0815568	0.0332494	-0.0540988	-0.0665868	0.111161	0.0270324	0.023869
Q9NRN7	AASDHPPT	0					-0.177549	0.0696591	-0.202183	-0.103358	-0.0889606	0.0138595	-0.0425358	-0.0392123
O94776	MTA2	0					0.0831034	-0.0577815	0.0715831	0.0323017	-0.0927532	-0.0478223	0.0054731	-0.0450341
Q9NQS7	INCENP	0					0.366443	-0.025501	-0.0234866	0.105819	0.0424601	-0.0862575	-0.0861142	-0.0433039
O14757	CHEK1	0					-0.10148	0.0304423	-0.288819	-0.119952	-0.0930447	-0.0236296	-0.164051	-0.093575
Q9BX40	LSM14B	0					-0.0854414	-0.0803346	-0.206662	-0.124146	-0.0427548	0.031836	-0.209007	-0.0733085
O00170	AIP	0					-0.306255	-0.0137676	-0.223751	-0.181258	-0.198433	0.0090847	-0.15031	-0.113219
Q9UID3	VPS51	0	+				0.0187573	-0.149337	-0.203196	-0.111259	-0.0710302	0.148663	0.0221534	0.0332621
Q9BW71	HIRIP3	0					-0.331158	0.180452	-0.186916	-0.112541	0.0867576	-0.241747	-0.708575	-0.287855
Q9UL54	TAOK2	5	+				-0.0988557	0.175595	0.0526267	0.0431222	-0.0217908	0.247977	-0.0507915	0.058465
Q14865	ARID5B	0					-0.076021	-0.207485	-0.388981	-0.224162	-0.278059	-0.411829	-0.365498	-0.351796
O95084	PRSS23	0	+				0.0244679	-0.113576	0.000428689	-0.02956	-0.149692	-0.167896	-0.21062	-0.176069
P48643	CCT5	0					-0.288611	-0.0277857	-0.136878	-0.151092	-0.220734	-0.136173	-0.21108	-0.189329
Q14185	DOCK1	0					-0.334043	-0.0323439	-0.121499	-0.162629	-0.193823	-0.160934	-0.459771	-0.271509
P10515	DLAT	0					-0.046591	-0.160138	-0.0200411	-0.07559	-0.119312	-0.130966	-0.0857376	-0.112005
Q9NZV1	CRIM1	1	+			+	0.641433	0.210848	0.707564	0.519949	0.605831	0.638446	0.488617	0.577632
O94855	SEC24D	0				+	0.461383	0.652622	0.63449	0.582831	0.853075	1.02414	0.908999	0.928737
O43583	DENR	0					-0.0309596	0.22775	0.0242415	0.0736775	0.157768	0.240156	0.221265	0.206396
Q96Q11	TRNT1	0					-0.0935928	0.123851	0.0175438	0.015934	0.0266546	0.134799	0.0938556	0.0851031
Q9NWU1	OXSM	0					0.258611	0.00647881	0.0931495	0.119413	0.0192885	0.186548	0.264703	0.156847
Q8NHP8	PLBD2	0	+				-0.345158	-0.449939	-0.559226	-0.451441	-0.682015	-0.482837	-0.519827	-0.56156
Q4G148	GXYLT1	1	+				0.194706	0.0200486	0.0897151	0.10149	0.208923	0.232017	0.0515399	0.16416
Q02487	DSC2	1	+				-0.28794	-0.14677	-0.247618	-0.227443	-0.571854	-0.649668	-0.582028	-0.601183
E9PQ53	NDUFC2-KCTD14	1	+				0.158411	-0.0690405	0.134542	0.0746377	0.0738371	-0.00167083	-0.0377413	0.011475
Q96I59	NARS2	0					0.00410814	-0.0142798	0.138236	0.0426881	-0.0567627	-0.0239037	0.0647179	-0.00531616
O75794	CDC123	0					-0.165582	0.151443	-0.0486043	-0.0209144	0.0308806	0.18612	0.0338363	0.0836122
Q9H974	QTRT2	0					-0.0647468	0.0458411	0.0475674	0.00955393	0.0217045	-0.0234926	0.0154042	0.0045387
Q6ZMI0	PPP1R21	0					-0.0512362	0.236436	0.161367	0.115522	0.322317	0.105544	-0.211771	0.0720301
Q71F23	CENPU	0					0.129789	-0.23422	-0.208133	-0.104188	0.2491	-0.0445839	0.126704	0.110406
P12235	SLC25A4	6					0.172477	0.000905205	0.140067	0.104483	0.102461	0.145485	0.0815376	0.109828
A2RRP1	NBAS	0	+				0.070741	-0.0544238	-0.41339	-0.132358	0.0425668	-0.126378	-0.119489	-0.0677669
Q07157	TJP1	0					0.145779	0.012726	0.22137	0.126625	0.121713	0.0569793	0.160347	0.113013
Q8N442	GUF1	0					-0.182928	-0.0900841	-0.125182	-0.132732	-0.155096	0.167489	-0.133889	-0.0404989
O15381	NVL	0					0.0584835	-0.105187	-0.00544215	-0.017382	-0.0401384	-0.0301936	0.0423178	-0.00933805
Q9NSD9	FARSB	0					-0.0968844	-0.0766614	-0.117553	-0.0970329	-0.0635178	-0.0821834	-0.134618	-0.0934397
Q6P582	MZT2A	0					-0.304263	-0.0165822	-0.177304	-0.16605	-0.166953	-0.0922819	-0.261857	-0.173697
Q71F56	MED13L	0					-0.0122545	-0.407584	0.361402	-0.0194789	0.0336344	-0.572696	-0.396094	-0.311719
Q9UJY1	HSPB8	0				+	0.406025	0.679578	0.438587	0.508063	0.491996	0.657549	0.460643	0.536729
Q8WXD5	GEMIN6	0					-0.174956	-0.0691637	-0.0134142	-0.0858447	-0.089058	0.0767678	-0.448782	-0.153691
Q5W0B1	RNF219	0					-0.309096	-0.210505	-0.176242	-0.231947	-0.0173974	-0.167399	-0.293728	-0.159508
Q2TBE0	CWF19L2	0					0.0588497	-0.380827	-0.223017	-0.181665	-0.0702413	0.00670308	-0.476625	-0.180055
Q96GW9	MARS2	0					0.150845	-0.108909	0.0449295	0.0289552	-0.0860365	-0.0693606	-0.0982384	-0.0845451
P47974	ZFP36L2	0					-0.16694	-0.216637	-0.719318	-0.367631	0.104575	-0.203299	-0.277111	-0.125278
P46937	YAP1	0					-0.0505574	0.0474436	0.241661	0.0795159	0.0297172	0.0930668	0.101126	0.0746366
Q6KC79	NIPBL	0					0.157888	-0.0228312	0.0702684	0.0684419	0.0463051	-0.0312846	0.0559654	0.0236619
Q8N335	GPD1L	0					-0.328453	0.0287269	-0.26133	-0.187019	-0.261394	-0.144894	-0.283255	-0.229848
P31483	TIA1	0					-0.274049	-0.294388	-0.270741	-0.279726	-0.110705	-0.257684	-0.129877	-0.166089
P56199	ITGA1	1	+				0.372136	0.312248	0.492012	0.392132	0.428565	0.486037	0.600124	0.504909
Q641Q2	WASHC2A	0					0.0291248	-0.0112042	0.0898975	0.0359394	0.0061235	-0.00250564	0.0554115	0.0196765
Q13503	MED21	0					-0.114855	-0.445104	-0.357342	-0.305767	-0.814469	-0.202209	-0.385525	-0.467401
P53384	NUBP1	0					-0.0460235	0.114023	-0.0815635	-0.00452118	0.0552089	0.139288	0.0873296	0.0939422
Q9BVS4	RIOK2	0					-0.0812376	0.106209	0.123181	0.0493841	0.135982	0.244358	0.150124	0.176822
O60264	SMARCA5	0					0.126842	-0.117276	0.03062	0.0133953	-0.037719	-0.093327	0.00774864	-0.0410991
P49792	RANBP2	0					0.103358	-0.0193913	0.0919246	0.0586306	-0.0274925	-0.0357768	0.029478	-0.0112638
Q96K49	TMEM87B	7	+				-0.0506705	-0.0742074	0.0982982	-0.00885995	0.114295	-0.231697	-0.0966194	-0.0713404
Q9NT62	ATG3	0					-0.218419	0.156189	-0.132099	-0.064776	0.0356501	0.247299	0.0767522	0.1199
Q9H871	RMND5A	0					-0.374928	-0.209834	-0.137362	-0.240708	-0.18647	-0.601539	0.133352	-0.218219
P49247	RPIA	0					-0.341	0.103984	-0.0173331	-0.0847829	-0.00217317	-0.0149689	-0.116788	-0.0446435
P29083	GTF2E1	0					-0.362218	-0.171662	-0.119354	-0.217745	-0.169718	-0.11703	-0.317444	-0.201397
Q9UEE9	CFDP1	0					-0.118098	0.0390507	-0.116114	-0.065054	0.000310739	0.106624	0.0168863	0.0412736
Q14669	TRIP12	0					0.142411	-0.096749	-0.0210047	0.00821912	-0.0244408	0.0752258	0.0233715	0.0247188
Q96SI1	KCTD15	0					-0.162548	0.0963624	-0.185981	-0.0840557	-0.271896	0.0854634	0.0248619	-0.0538571
Q9HCJ1	ANKH	8	+				0.124924	0.0672188	0.0383291	0.0768238	0.0285548	-0.0908435	0.0186398	-0.0145496
Q8TF42	UBASH3B	0					0.534569	0.600097	-0.00416041	0.376835	0.427589	0.497518	0.689049	0.538052
Q96BN8	OTULIN	0					-0.184064	0.509945	0.101477	0.142453	0.137918	0.12325	0.0999829	0.120384
O94826	TOMM70	1					0.0879537	-0.107589	0.0302347	0.00353307	-0.059548	-0.0796808	-0.00903176	-0.0494202
Q96F44	TRIM11	0					-0.357012	-0.0377697	0.161041	-0.0779135	0.0744913	-0.41549	-0.0574647	-0.132821
Q7L7V1	DHX32	0					0.0872064	0.306465	-0.00827498	0.128465	0.204978	0.195327	0.162642	0.187649
Q9NTK5	OLA1	0					-0.0997311	0.227357	-0.0488862	0.0262466	0.121939	0.189071	0.0248619	0.111957
P78310	CXADR	1	+				0.0778983	-0.0554196	0.0929848	0.0384878	-0.0901286	-0.0680321	0.0687648	-0.0297986
Q9NYK5	MRPL39	0					0.00917117	-0.119896	-0.0692286	-0.0599845	-0.215035	-0.155065	-0.133039	-0.167713
Q01831	XPC	0					0.551665	0.0366618	0.0323548	0.206894	0.262827	0.229891	0.167512	0.220077
P42765	ACAA2	0					0.178831	0.0370598	0.163631	0.126507	0.102016	0.0841925	0.160079	0.115429
Q9P0U4	CXXC1	0					1.05115	-0.0715032	0.256107	0.411919	0.32452	0.0366868	0.222306	0.194504
P19447	ERCC3	0					0.203587	-0.103142	0.0581503	0.0528648	-0.0168858	0.134478	-0.0524627	0.0217098
Q9NUQ2	AGPAT5	3					0.130687	-0.107589	-0.0228117	9.51933e-05	-0.229506	0.202651	0.0854906	0.0195452
P48723	HSPA13	0	+				0.335263	0.16499	0.372258	0.290837	0.371311	0.487287	0.370571	0.409723
Q9UHP3	USP25	0					-0.418286	-0.224957	-0.0334052	-0.22555	-0.24724	-0.0984113	-0.377753	-0.241135
Q6PH81	C16orf87	0					0.563897	-0.115607	-0.956467	-0.169392	-0.335329	0.778567	1.10207	0.515102
Q86WA8	LONP2	0					0.3451	0.221903	0.334171	0.300391	0.0594116	0.242462	0.277663	0.193179
Q9BYG3	NIFK	0					0.296255	0.0270134	0.141202	0.154823	0.150738	-0.0608373	-0.00465585	0.0284149
Q8TEQ6	GEMIN5	0					-0.222041	-0.156779	-0.14913	-0.175983	-0.250988	-0.191635	-0.186001	-0.209541
P15121	AKR1B1	0				+	0.762785	1.32792	1.09297	1.06122	1.35973	1.49432	1.55343	1.46916
Q92621	NUP205	0					0.00775634	-0.0406636	-0.0114254	-0.0147775	-0.0936271	-0.0426917	-0.0566963	-0.0643383
	LCOR						0.118675	-0.220526	-0.00916113	-0.0370041	0.522748	-0.179998	0.0697431	0.137498
Q8IUH3	RBM45	0					0.407641	-0.0404121	-0.0909474	0.0920939	0.0652513	-0.127654	0.378794	0.105464
P13667	PDIA4	0	+				0.308904	0.222401	0.368866	0.300057	0.290934	0.337001	0.408621	0.345519
P54709	ATP1B3	1	+				-0.206482	-0.29101	-0.160051	-0.219181	-0.339101	-0.303334	-0.209122	-0.283852
P61758	VBP1	0					-0.191678	0.0891931	-0.131786	-0.0780901	0.0657931	0.11345	0.00480441	0.0613493
P51809	VAMP7	1	+				-0.0789091	-0.00322854	-0.0264694	-0.0362023	-0.240594	-0.0558867	-0.148027	-0.148169
P50148	GNAQ	0					-0.0827877	0.701065	0.52652	0.381599	-0.142109	-0.162802	0.124858	-0.0600179
P55263	ADK	0					-0.201598	0.197696	-0.156702	-0.0535348	0.0669861	0.104076	-0.068561	0.034167
P27707	DCK	0					-0.380251	-0.0338602	-0.538245	-0.317452	-0.0167833	-0.0601693	-0.283474	-0.120142
P27105	STOM	0	+				0.340938	0.247859	0.363298	0.317365	0.228932	0.214646	0.400104	0.281227
P50990	CCT8	0					-0.318055	-0.0327232	-0.126989	-0.159256	-0.216195	-0.13211	-0.209007	-0.185771
P14927	UQCRB	0					-0.00666543	-0.104346	-0.0669715	-0.0593276	-0.124357	-0.144894	-0.0703386	-0.113196
Q96E29	MTERF3	0					0.0286464	-0.119896	-0.0908989	-0.0607162	-0.0523748	0.00334771	-0.00252933	-0.0171855
Q6YHK3	CD109	0	+				-0.00339497	-0.137985	-0.00912704	-0.0501691	-0.19518	-0.115616	0.00908863	-0.100569
Q6PL18	ATAD2	0					-0.0343971	-0.300909	-0.145879	-0.160395	-0.228623	-0.178522	-0.119244	-0.175463
Q6UVJ0	SASS6	0					-0.419689	-0.197711	-0.107721	-0.241707	-0.00877634	-0.197478	-0.124998	-0.110418
O60566	BUB1B	0					-0.135061	0.138292	0.0822717	0.0285009	0.00778867	0.164925	-0.001465	0.057083
Q9Y2C4	EXOG	0	+				-0.0386253	-0.0579056	0.107339	0.00360257	-0.213339	0.792472	0.207276	0.262136
Q9UG63	ABCF2	0					-0.0711203	-0.0047756	-0.00656902	-0.0274883	-0.0605414	-0.00653334	-0.0628323	-0.0433023
Q5SWX8	C1orf27	2	+				-0.172462	-0.218305	0.127557	-0.0877367	-0.0849628	-0.170126	0.117511	-0.0458594
Q9H8X2	IPPK	0					0.0992093	0.0457077	-0.050791	0.0313753	-0.0449651	-0.165786	0.284041	0.02443
Q9HBH1	PDF	0					0.133512	0.0333502	-0.0224067	0.048152	0.159271	-0.141109	0.267892	0.0953517
O95067	CCNB2	0					0.127482	-0.134574	-0.0914784	-0.0328568	0.0473749	-0.469013	-0.26219	-0.227943
Q12965	MYO1E	0					0.0114139	0.0437075	-0.0727869	-0.00588848	-0.0965359	-0.0365919	-0.0486031	-0.060577
Q9UKG1	APPL1	0					-0.377456	-0.096749	-0.207435	-0.227213	-0.194728	-0.0645724	-0.38328	-0.214193
Q5U3C3	TMEM164	7	+				0.357135	0.143138	0.637714	0.379329	0.171466	0.36153	0.490656	0.341218
Q5HYK3	COQ5	0					-0.0745749	0.103012	0.130632	0.0530232	-0.0298276	0.0770616	0.0405352	0.0292564
Q96PY5	FMNL2	0					-0.00292719	0.143281	0.0257942	0.0553827	-0.0289142	0.00334771	0.449774	0.141403
Q96C57	C12orf43	0					0.363289	-0.00322854	0.0511337	0.137065	0.135527	0.0920417	0.13622	0.121263
Q9NRX2	MRPL17	0					0.0417375	-0.0353747	-0.0626274	-0.0187549	-0.210567	-0.120238	-0.0911262	-0.140644
Q32MZ4	LRRFIP1	0					-0.0160846	0.134598	0.0915227	0.0700119	0.160312	0.147073	0.127024	0.144803
P42025	ACTR1B	0					0.17076	0.189741	0.213515	0.191339	0.0758006	0.206698	0.325279	0.202593
Q9UKZ1	CNOT11	0					-0.0117896	0.283576	-0.0252567	0.0821766	-0.0270858	0.191042	0.161926	0.108627
Q68EM7	ARHGAP17	0					-0.112255	0.207515	-0.129091	-0.011277	0.185414	0.116106	0.00828431	0.103268
O15027	SEC16A	0					-0.0332521	0.129639	0.0983714	0.0649193	0.240754	0.252933	0.169998	0.221228
P57076	C21orf59	0					-0.226656	0.17991	-0.219413	-0.0887198	-0.0419503	0.169556	-0.00199724	0.0418695
Q14974	KPNB1	0					-0.108346	0.00829799	-0.0402747	-0.0467743	-0.0711287	-0.028692	-0.0523343	-0.0507183
Q08334	IL10RB	1	+				-0.232554	-0.0984406	-0.150768	-0.160587	-0.664087	-0.396246	-0.211771	-0.424035
Q9HCD5	NCOA5	0					0.328271	-0.0723643	0.167554	0.141154	0.061788	0.0319783	0.0336999	0.0424887
Q9NZT2	OGFR	0					-0.397082	-0.145369	-0.328685	-0.290378	-0.195723	-0.0786256	-0.259856	-0.178068
P48047	ATP5O	0					-0.0300416	-0.125003	-0.0212751	-0.0587732	-0.112622	-0.099452	-0.0588724	-0.0903156
Q96H20	SNF8	0					-0.278017	0.20175	-0.38334	-0.153203	-0.179902	-0.0322387	-0.346447	-0.186196
Q9NZI8	IGF2BP1	0					-0.0141128	0.0350712	0.0527513	0.0245699	0.0428869	0.113827	0.0636034	0.0734392
P16152	CBR1	0					-0.17589	0.292352	0.01048	0.042314	0.126906	0.234097	0.125177	0.16206
O75828	CBR3	0					0.167071	0.461306	0.292751	0.307043	0.32141	0.299687	0.153662	0.258253
P62736	ACTA2	0					-0.000351575	-0.685133	0.0633185	-0.207389	-0.059051	-0.017311	0.311755	0.0784642
Q8IVS2	MCAT	0					0.140343	-0.0239761	0.0656853	0.060684	-0.107248	-0.0245888	0.186188	0.0181171
P28070	PSMB4	0					-0.0890823	0.124556	-0.0148065	0.00688895	0.0797356	0.179178	0.0262181	0.0950438
Q9UKV5	AMFR	7	+				-0.00748187	-0.53743	-0.351844	-0.298919	-0.460504	-0.517607	-0.292858	-0.423657
Q8IWV7	UBR1	0					-0.301888	0.206456	0.069009	-0.00880771	0.188715	0.108125	-0.0566963	0.0800478
Q13564	NAE1	0					-0.25875	0.12371	-0.195536	-0.110192	0.0410742	0.0933194	-0.0776799	0.0189046
Q13951	CBFB	0					-0.258652	0.107045	-0.171926	-0.107845	-0.151464	0.0342593	-0.00571779	-0.0409743
Q9BRQ6	CHCHD6	0					0.136086	-0.0484355	0.242574	0.110075	0.182825	0.000139471	0.0616555	0.08154
Q9NP77	SSU72	0					-0.154252	-0.164874	-0.214723	-0.177949	-0.107152	-0.0493042	-0.431004	-0.19582
Q9BXS5	AP1M1	0					-0.0474986	0.073327	0.075065	0.0336311	-0.00692229	0.133851	0.0652754	0.0640681
P10588	NR2F6	0					0.468177	0.512525	0.0956573	0.358786	-0.464488	-0.396564	-0.287082	-0.382711
Q4VC31	CCDC58	0					0.0636189	-0.0663265	0.0220288	0.00644038	-0.0800723	-0.0757201	-0.0215558	-0.0591161
P04080	CSTB	0					-0.36012	0.308273	-0.233176	-0.0950078	-0.0204641	0.0645505	0.010967	0.0183511
Q15269	FP565260.1	0					-0.023253	-0.123936	-0.0392907	-0.0621597	-0.100212	-0.171982	-0.0592561	-0.110484
Q6P5Z2	PKN3	0					0.209944	0.205472	-0.224427	0.0636631	-0.300854	0.218596	0.46678	0.128174
Q96CP7	TLCD1	4	+				0.488966	-0.117872	0.148272	0.173122	0.408493	0.190088	0.0942823	0.230954
Q8N511	TMEM199	2	+				-0.349764	-0.556719	-0.584945	-0.497143	-0.478605	-0.538285	-0.408896	-0.475262
Q15424	SAFB	0					0.242575	-0.084852	0.103852	0.0871917	0.161354	0.0244483	0.110877	0.0988931
O95571	ETHE1	0					0.19887	0.142282	0.116381	0.152511	0.0858779	0.254012	0.142368	0.160753
Q7Z7E8	UBE2Q1	0					-0.408783	0.0558856	-0.0922348	-0.148377	-0.117404	0.213644	0.118508	0.0715828
Q9NW15	ANO10	8	+				0.460834	0.140143	0.151506	0.250828	0.141455	0.219034	0.24458	0.20169
Q9BV68	RNF126	0					-0.0834516	0.0865824	-0.143071	-0.0466469	-0.0286098	0.0289901	-0.153188	-0.050936
Q17RY6	LY6K	0	+				0.0895741	-0.39289	0.0284673	-0.0916161	-0.0517755	-0.069095	0.00895463	-0.0373053
Q96RE7	NACC1	0					-0.255219	-0.235977	-0.11989	-0.203695	-0.241032	-0.380707	-0.361978	-0.327906
P39880	CUX1	0					0.00175917	-0.156895	0.0388045	-0.0387771	-0.0945004	-0.118571	0.0268966	-0.0620583
Q9UFC0	LRWD1	0					0.336521	-0.0545483	0.0336004	0.105191	0.115417	0.0950594	-0.112605	0.0326239
Q96GG9	DCUN1D1	0					-0.181586	0.269809	0.0405494	0.0429244	0.106469	-0.00861215	0.00253366	0.0334636
P51692	STAT5B	0					0.131585	0.40755	0.348573	0.295903	0.338071	0.333749	0.305369	0.32573
Q8IZ83	ALDH16A1	0	+				0.0891999	0.129921	-0.0595869	0.0531781	0.0229668	0.127201	0.0489188	0.0663624
P08648	ITGA5	1	+				0.222197	0.0863079	0.249263	0.185923	0.0386255	-0.0470135	0.131512	0.0410414
Q9P086	MED11	0					-0.0704508	-0.13634	-0.00631309	-0.0710345	-0.0361037	-0.128164	-0.0480877	-0.0707851
P60842	EIF4A1	0					-0.137088	0.0831545	-0.0389403	-0.0309579	0.0213892	0.0558492	-0.0303237	0.0156382
Q9Y2Y1	POLR3K	0					0.0390855	0.150582	-0.473406	-0.0945797	0.102794	-0.000139227	-0.0774274	0.00840923
Q9NQ29	LUC7L	0					0.0370398	-0.0233401	0.0796055	0.0311018	-0.112143	0.0152668	-0.00106557	-0.0326473
Q9Y303	AMDHD2	0					-0.326024	0.104679	-0.0722815	-0.0978756	0.0870876	0.0429886	0.739521	0.289866
O60503	ADCY9	12	+				-0.152355	-0.906468	-0.859347	-0.63939	0.186474	-0.224441	-0.987287	-0.341751
Q9Y6J9	TAF6L	0					-0.0214065	0.205725	-0.0669224	0.0391321	0.237698	-0.0675004	-0.187757	-0.00585316
Q13190	STX5	1	+				-0.281493	0.0905691	-0.109883	-0.100269	-0.481278	-0.0778337	0.0580444	-0.167023
O95159	ZFPL1	1	+				-0.272691	-0.466314	-0.118296	-0.285767	-0.465463	-0.546035	-0.3231	-0.444866
Q9C0D3	ZYG11B	0					-0.16767	-0.33943	-0.249076	-0.252059	-0.0190338	-0.00805809	-0.0863651	-0.037819
Q9NWV4	C1orf123	0					-0.0233683	0.312039	-0.184715	0.0346522	-0.0123748	0.0938102	0.0805511	0.0539955
Q9UPU5	USP24	0					-0.154989	-0.0170933	-0.133459	-0.101847	-0.0592499	-0.00292279	-0.102216	-0.0547961
Q9NVH1	DNAJC11	0					-0.00759839	-0.0469346	0.00319276	-0.0171134	-0.125022	-0.1133	-0.0300628	-0.0894614
Q96AE4	FUBP1	0					-0.0533839	-0.0965073	-0.0118166	-0.0539026	-0.0427548	-0.0593673	0.0520924	-0.0166766
P17655	CAPN2	0					0.0429443	0.443422	0.189951	0.225439	0.29843	0.420668	0.330916	0.350005
Q92968	PEX13	1	+				0.416124	0.236665	0.553645	0.402145	-0.415633	0.102205	-0.000266512	-0.104565
Q8NFH5	NUP35	0					0.105248	-0.0680541	0.0896056	0.0422666	-0.0239315	-0.0123468	0.113037	0.0255861
Q8WUX2	CHAC2	0					0.172477	0.390011	-0.107944	0.151515	-0.106575	-0.129056	-0.0646169	-0.100083
Q8NC42	RNF149	1	+				-0.0626161	-0.0712571	0.226978	0.0310349	0.197239	0.0244483	0.327351	0.183013
Q96ST2	IWS1	0					0.0230382	-0.0167099	-0.0195338	-0.00440182	-0.142297	0.00768329	0.10413	-0.0101612
Q8NBL1	POGLUT1	0	+				-0.0369126	-0.0826561	-0.00364746	-0.041072	0.0687229	0.0877268	0.220504	0.125651
Q9H4A4	RNPEP	0					-0.30796	0.124697	-0.17083	-0.118031	0.0150961	0.0958931	-0.0791942	0.0105983
Q8N6L1	KRTCAP2	3	+				0.267472	0.172343	0.2614	0.233738	0.291695	0.236491	0.227366	0.251851
P49368	CCT3	0					-0.345619	-0.0575329	-0.145538	-0.182897	-0.24497	-0.156691	-0.218657	-0.206773
Q96BH1	RNF25	0					-0.0670983	0.052932	-0.0249199	-0.0130287	0.270927	0.177491	0.236018	0.228145
Q8TCG1	KIAA1524	1					-0.192088	0.235903	-0.093344	-0.0165096	-0.0594486	0.0240233	-0.116174	-0.0505331
Q8TCJ2	STT3B	11	+				-0.0270539	-0.218972	-0.110137	-0.118721	-0.119407	-0.125101	-0.117157	-0.120555
P41743	PRKCI	0					-0.113772	0.135733	-0.0606887	-0.0129092	0.0701357	0.0200621	-0.0126025	0.0258651
Q6NUM9	RETSAT	0	+				0.0924454	-0.0716263	-0.00070272	0.00670545	-0.093433	-0.098151	0.00949105	-0.0606976
Q8N8Q8	COX18	3	+				0.161554	0.129073	-0.0273445	0.0877609	0.012482	-0.0341448	0.240953	0.0730969
Q6I9Y2	THOC7	0					-0.0864352	-0.0653383	0.114338	-0.0124786	-0.0781115	-0.099712	-0.0982384	-0.0920206
Q15008	PSMD6	0					-0.032221	0.0874062	0.0209845	0.0253899	0.0442745	0.159298	0.0683456	0.0906392
Q8TF72	SHROOM3	0					0.421577	-0.0187533	0.186786	0.196536	0.324909	-0.0568247	0.103987	0.124024
P46976	GYG1	0					-0.284672	0.438595	-0.126314	0.0092031	0.225053	0.0868091	0.0924346	0.134766
O75394	MRPL33	0					0.181487	0.0109011	-0.171073	0.00710477	-0.179993	-0.163051	-0.00757462	-0.116873
Q9NQ48	LZTFL1	0					0.117276	0.499069	0.240142	0.285495	0.458992	0.570704	0.447356	0.49235
Q9BQS8	FYCO1	0					0.142411	-0.00297053	0.29103	0.14349	0.152349	-0.0967185	0.107715	0.0544483
Q8TDB6	DTX3L	0					0.0603155	0.285466	0.0804937	0.142092	0.134617	0.254527	0.0645785	0.151241
P18084	ITGB5	1	+				-0.129394	-0.193307	-0.070764	-0.131155	-0.167691	-0.157065	-0.0853609	-0.136706
Q8TAD8	SNIP1	0					0.349559	-0.0841203	0.116474	0.127304	0.140998	0.0952531	0.0705825	0.102278
Q9BXB4	OSBPL11	0					0.143058	0.137012	-0.167582	0.0374962	0.0634102	-0.0256841	-0.055543	-0.00593894
P04843	RPN1	1	+				0.0712334	-0.0123583	0.105087	0.0546541	-0.0141193	0.0117511	0.0373871	0.0116729
O94888	UBXN7	0					-0.100497	0.0865824	-0.0258632	-0.0132591	-0.0725084	-0.0162094	-0.0839788	-0.0575655
P25815	S100P	0					-0.0134162	0.331804	0.0961338	0.138174	0.310709	0.401476	0.314072	0.342086
Q32P28	P3H1	0	+				0.0719723	-0.0489354	0.132323	0.0517865	0.182707	0.254178	0.390902	0.275929
P53582	METAP1	0					-0.0783541	-0.16522	-0.0525611	-0.0987117	-0.152769	-0.0282822	0.0135202	-0.0558437
P11766	ADH5	0					-0.255219	0.187236	-0.180984	-0.0829888	0.0366058	0.162412	-0.0394276	0.0531969
Q9BUT1	BDH2	0					-0.531596	0.0141615	-0.267041	-0.261492	-0.28666	-0.249386	-0.256178	-0.264075
O15173	PGRMC2	1	+				0.00869943	-0.0216855	-0.0726402	-0.0285421	0.0599514	0.0207687	0.0489188	0.043213
P13798	APEH	0					-0.122412	0.311141	0.0381531	0.0756274	0.0465189	0.201834	0.0903053	0.112886
Q8NHS3	MFSD8	12	+				0.504163	0.258475	0.0659543	0.276197	0.428565	0.498403	0.457255	0.461408
Q6UXN9	WDR82	0					0.0254221	-0.06645	-0.0508572	-0.0306284	-0.0933358	-0.0680321	-0.0541319	-0.0718333
O75446	SAP30	0					-0.0745749	0.0727831	-0.133944	-0.0452451	-0.045768	-0.345174	0.118841	-0.0907003
Q13257	MAD2L1	0					-0.169547	0.182768	-0.0354645	-0.00741454	-0.00506577	0.0556321	-0.123164	-0.0241992
P08758	ANXA5	0					-0.0283186	0.439068	0.103134	0.171294	0.354926	0.43271	0.303575	0.363737
Q9BXJ9	NAA15	0					-0.211552	-0.0813124	-0.123987	-0.13895	-0.0678719	-0.006256	-0.0498907	-0.0413395
Q9Y2F5	ICE1	0					-0.0450013	-0.160716	-0.0107277	-0.0721485	-0.198433	-0.501262	-0.155104	-0.284933
P61221	ABCE1	0					-0.0987464	0.0449073	-0.0892076	-0.0476822	0.0361807	0.0282794	-0.0676713	-0.00107042
P17301	ITGA2	1	+				0.329861	0.280935	0.471493	0.360763	0.383959	0.593921	0.679352	0.552411
Q8N183	NDUFAF2	0					0.129404	0.0900186	0.190557	0.13666	0.163209	0.145871	0.20132	0.170133
Q96DG6	CMBL	0					-0.225052	0.268298	-0.0246164	0.00620989	0.023493	0.125544	0.0011996	0.0500788
Q96M27	PRRC1	0	+				0.154101	0.254043	0.165784	0.191309	0.443416	0.435721	0.298962	0.3927
P62266	RPS23	0					0.027093	-0.0585265	-0.0899328	-0.0404554	-0.0128881	-0.0787575	-0.111865	-0.0678369
O43181	NDUFS4	0					0.0220858	-0.163489	-0.0206497	-0.0540178	0.0646014	0.0854634	-0.0322794	0.0392618
Q8WVY7	UBLCP1	0					-0.212665	0.169548	-0.157994	-0.0670368	-0.0197491	0.0739201	-0.0778062	-0.00787839
Q8TED0	UTP15	0					0.155015	-0.0777643	0.0499974	0.0424159	-0.0171928	0.00404606	0.0346549	0.00716939
Q96BQ5	CCDC127	0					0.11664	-0.100372	0.217457	0.0779085	0.0379873	-0.070953	0.0498839	0.00563939
Q86SQ4	ADGRG6	7	+				-0.394052	-0.392791	-0.492666	-0.426503	-0.559117	-0.677549	-0.658301	-0.631656
Q8N8Z6	DCBLD1	1	+				-0.187361	-0.268325	0.25625	-0.0664787	-0.14642	-0.0375425	-0.131459	-0.105141
O95391	SLU7	0					0.156189	-0.0586506	-0.00410918	0.0311432	0.0119598	0.124146	0.144266	0.0934574
Q8TA86	RP9	0					0.285073	-0.0881396	0.45295	0.216628	0.26843	0.0579798	0.177528	0.167979
P38646	HSPA9	0					0.0730816	-0.0601395	0.093369	0.035437	-0.0445635	-0.0230813	0.0341091	-0.0111786
Q8IWU2	LMTK2	2	+				-0.0123707	0.220773	0.0973255	0.101909	0.327896	-0.254767	-0.200336	-0.0424025
O60216	RAD21	0					0.00175917	-0.0974743	-0.00340799	-0.033041	-0.0787	-0.11433	0.0436907	-0.0497797
O43913	ORC5	0					-0.106605	-0.267896	-0.0164518	-0.130318	-0.0635178	-0.0682979	-0.040853	-0.0575562
Q86Y56	DNAAF5	0					-0.171006	-0.0671905	-0.210624	-0.149607	-0.0989554	-0.0304664	-0.15103	-0.093484
Q9H814	PHAX	0					-0.193217	-0.0289266	-0.173736	-0.13196	0.00633156	-0.0318299	-0.182836	-0.0694446
Q9H2D1	SLC25A32	6					0.0492368	0.0193934	0.040426	0.0363521	0.370106	0.0352584	0.201397	0.202254
Q69YN4	KIAA1429	0					0.0576292	-0.0275319	0.135107	0.055068	-0.0722129	-0.105551	-0.022868	-0.0668773
Q6NSJ0	KIAA1161	1	+				0.106005	-0.00219617	0.316768	0.140192	-0.138539	0.0325482	0.0900216	-0.00532295
Q6PI78	TMEM65	3					0.314315	0.22219	0.296158	0.277554	0.190132	0.135993	0.116167	0.147431
Q9H6R4	NOL6	0					0.0663162	-0.106749	0.022638	-0.00593155	-0.0597468	-0.0809984	-0.0559275	-0.0655576
Q14191	WRN	0					-0.397793	0.0231983	-0.335224	-0.236606	-0.0746735	-0.46114	-0.176011	-0.237275
P52655	GTF2A1	0					-0.222945	-0.139981	-0.00475877	-0.122562	-0.015452	0.111161	0.0384813	0.0447302
O15357	INPPL1	0					0.0681582	0.396412	0.187489	0.217353	0.305964	0.432427	0.340905	0.359766
O94913	PCF11	0	+				0.165361	0.12512	0.119842	0.136774	0.164833	-0.0589661	-0.110261	-0.0014647
O60524	NEMF	0					-0.0922741	-0.0155594	-0.0394742	-0.0491026	-0.0494757	-0.0503809	-0.0286267	-0.0428278
P62330	ARF6	0					0.0254221	0.0882305	0.151163	0.0882719	0.129396	0.105424	0.211358	0.148726
Q15018	FAM175B	0					-0.0799074	0.0942907	-0.0299332	-0.00518331	0.0069559	0.136146	-0.0135267	0.0431917
P30048	PRDX3	0					0.0573854	-0.0754349	0.0714571	0.0178026	-0.0380216	-0.0510536	0.031928	-0.0190491
Q5SXM2	SNAPC4	0					-0.249315	-0.258524	-0.114927	-0.207589	-0.114345	-0.280001	-0.186821	-0.193722
P00492	HPRT1	0					-0.239222	0.125966	-0.0910441	-0.0681	-0.0492755	0.00768329	-0.14164	-0.0610774
Q86U44	METTL3	0					-0.0127192	-0.0506841	0.00345049	-0.0199843	-0.0982784	0.0765328	-0.170931	-0.0642256
Q8WWH5	TRUB1	0					-0.190446	-0.0234673	-0.28122	-0.165044	-0.0826174	-0.169383	-0.231084	-0.161028
Q9P2I0	CPSF2	0					0.0879537	-0.13021	-0.0505592	-0.0309385	-0.0981817	-0.0891418	-0.031367	-0.0728968
Q96QK1	VPS35	0					-0.0397659	0.0115525	-0.0501121	-0.0261085	0.0355437	0.10466	0.0297501	0.0566513
Q70UQ0	IKBIP	1	+			+	0.512582	0.434361	0.654997	0.53398	0.554689	0.583069	0.675899	0.604552
Q9NWT6	HIF1AN	0					0.0999627	0.279584	0.0417669	0.140438	0.30622	0.158473	-0.0195857	0.148369
Q7Z4Q2	HEATR3	0					-0.181172	-0.0579056	-0.263903	-0.16766	-0.140795	-0.0799443	-0.152949	-0.124563
P12277	CKB	0					-0.419601	-0.00142145	-0.356271	-0.259098	-0.129384	-0.0647055	-0.285334	-0.159808
Q86YV9	HPS6	0					0.0387245	0.384599	-0.0400913	0.127744	-0.117499	0.45618	0.308484	0.215722
P61457	PCBD1	0					-0.464548	-0.00180884	-0.364285	-0.276881	-0.241558	-0.0783618	-0.314447	-0.211456
P78371	CCT2	0					-0.265591	-0.0247387	-0.128339	-0.139556	-0.17569	-0.128036	-0.17495	-0.159559
Q3T906	GNPTAB	2	+				0.309339	0.397467	0.141561	0.282789	0.130076	0.221761	0.733483	0.361774
Q12962	TAF10	0					-0.066203	-0.074453	0.081963	-0.0195643	-0.17624	-0.239035	-0.133889	-0.183055
O14773	TPP1	0	+				-0.543466	-0.223186	-0.244538	-0.337064	-0.660291	-0.457594	-0.294597	-0.470827
P50213	IDH3A	0					0.159066	0.098022	0.0791527	0.11208	0.00311056	-0.00597845	0.0739446	0.0236922
Q8NCN4	RNF169	0					0.179362	-0.150968	0.0756249	0.0346727	0.110824	-0.211985	-0.115313	-0.0721581
Q8WVC0	LEO1	0					0.146816	0.0119435	0.116511	0.0917568	0.0353314	-0.135919	-0.0462826	-0.0489568
Q96JJ7	TMX3	1	+				0.377546	0.0927734	0.259859	0.243393	0.190487	0.217332	0.322045	0.243288
Q9Y3Q3	TMED3	1	+				-0.263152	-0.461909	-0.328002	-0.351021	-0.344575	-0.413086	-0.449075	-0.402245
Q7Z7K6	CENPV	0					0.247298	-0.117514	-0.0248525	0.0349769	0.225538	0.0338313	-0.0248336	0.0781784
P14625	HSP90B1	0	+				0.159589	0.0787785	0.22373	0.154033	0.113511	0.19109	0.237651	0.18075
Q8WTW3	COG1	0					0.196317	0.127801	0.24562	0.189913	0.65171	0.371571	0.297455	0.440245
Q08AF3	SLFN5	0					0.207642	0.179031	0.30772	0.231464	0.273053	0.426461	0.408444	0.369319
P23284	PPIB	0	+				0.22603	0.187119	0.271361	0.22817	0.228811	0.240781	0.326833	0.265475
Q9H5X1	FAM96A	0					-0.148024	-0.112501	-0.190541	-0.150355	-0.00867339	0.094732	-0.122919	-0.0122869
Q9NYB0	TERF2IP	0					0.117021	-0.0647204	0.0621366	0.0381458	0.0862077	0.0633997	0.295033	0.148214
Q9BTE1	DCTN5	0					-0.138686	0.341452	0.0466639	0.0831435	0.0111245	-0.13122	0.147938	0.00928064
P53350	PLK1	0					-0.0708972	-0.0247387	-0.00677394	-0.0341366	-0.0561652	-0.0863888	0.0104301	-0.0440413
O76031	CLPX	0					0.129019	-0.0363836	0.0772701	0.0566353	-0.0945973	-0.0696261	0.0285265	-0.0452323
Q86TB9	PATL1	0					0.260014	0.204905	-0.0903354	0.124861	-0.0461693	0.0999338	0.198367	0.0840437
Q9NX20	MRPL16	0					0.0160287	0.0250388	0.105843	0.0489703	-0.0881814	-0.112011	-0.117771	-0.105988
O95081	AGFG2	0					-0.109107	0.491033	-0.907765	-0.17528	0.159387	0.127354	0.384557	0.223766
Q9Y3Q8	TSC22D4	0					-0.118962	-0.045056	-0.384523	-0.182847	0.10413	-0.000974869	-0.364774	-0.0872065
O95273	CCNDBP1	0					-0.445825	-0.0333549	-0.122759	-0.200646	0.0184489	0.0677009	0.17536	0.0871698
P30101	PDIA3	0	+				0.250362	0.140143	0.264795	0.218433	0.202116	0.242017	0.330799	0.25831
O43809	NUDT21	0					0.0663162	-0.0538012	0.113985	0.0421666	-0.0644093	-0.0240408	0.0175605	-0.0236299
Q9ULW0	TPX2	0					0.21851	-0.103744	0.044894	0.05322	0.0925986	-0.0633729	-0.0256194	0.0012021
P62314	SNRPD1	0					0.240635	-0.0658325	0.0516313	0.075478	0.0291886	-0.0574942	0.0393026	0.0036657
Q6P1M0	SLC27A4	2	+				0.248133	-0.0186256	0.299045	0.176184	0.114744	0.0555452	0.198	0.122763
P46108	CRK	0					0.0663162	0.151156	-0.0484883	0.0563278	0.118224	0.0672482	0.0825248	0.0893325
Q92616	GCN1	0					-0.11518	0.0869943	-0.0921864	-0.0401239	0.0401154	0.0925318	-0.0376113	0.0316786
Q15648	MED1	0					0.140859	-0.113098	0.0182209	0.0153273	0.0913845	-0.14565	-0.0524627	-0.035576
O75964	ATP5L	0					0.0200638	-0.0663265	0.0341446	-0.00403938	-0.0999222	-0.0832359	0.0100274	-0.0577102
Q96N21	TEPSIN	0					-0.376464	0.0765954	-0.134365	-0.144745	-0.275238	0.390641	-0.0616837	0.0179063
Q13586	STIM1	1	+				0.161685	0.0140309	0.0888212	0.0881791	-0.0575591	-0.0146932	0.0300222	-0.0140767
P23921	RRM1	0					-0.395657	-0.0455572	-0.277405	-0.23954	-0.152862	-0.0883558	-0.249133	-0.16345
Q96B54	ZNF428	0					0.121094	0.115143	0.55798	0.264739	-0.0788961	-0.263499	0.10499	-0.0791351
P67936	TPM4	0					0.284502	0.443175	0.33104	0.352906	0.41635	0.490278	0.379539	0.428722
P61006	RAB8A	0					0.0691416	-0.0211759	0.129657	0.0592074	0.0166669	-0.0417445	0.0285265	0.00114961
Q86VM9	ZC3H18	0					0.264653	-0.040035	0.119078	0.114565	0.122615	0.0503276	0.112893	0.0952784
P53602	MVD	0					-0.245266	0.290501	-0.0407249	0.00150327	-0.088084	0.0406937	-0.053105	-0.0334984
Q9UL33	TRAPPC2L	0					-0.271041	0.0574992	-0.177637	-0.130393	0.0359683	0.0401208	-0.24947	-0.0577935
O14686	KMT2D	0					-0.154568	0.0133782	0.132041	-0.00304959	0.0754733	-0.210902	0.0117727	-0.0412188
Q9BQE3	TUBA1C	0					-0.200681	0.200783	-0.0885306	-0.029476	0.0435272	0.110394	-0.0511773	0.034248
Q9P265	DIP2B	0					-0.11193	0.110949	0.0336354	0.0108848	0.109259	0.167113	0.0739446	0.116772
Q13111	CHAF1A	0					0.109162	-0.109268	-0.0892076	-0.0297713	-0.164275	-0.163921	-0.108779	-0.145659
Q9HC38	GLOD4	0					-0.187155	0.169505	-0.269888	-0.095846	0.00737226	-0.00514569	-0.130485	-0.0427529
Q2NL82	TSR1	0					0.006814	-0.11668	-0.0465472	-0.0521378	-0.0649046	-0.144138	-0.0742671	-0.0944365
Q9NPF0	CD320	1	+				0.230011	0.202463	0.157231	0.196568	0.00893447	0.104271	-0.420191	-0.102329
P32119	PRDX2	0					-0.281879	0.15691	-0.171926	-0.0989649	0.0686143	0.155522	0.0338363	0.0859907
O75947	ATP5H	0					0.0587275	-0.0603874	0.0167631	0.00503439	-0.0736898	-0.0623058	0.0119071	-0.0413628
Q92817	EVPL	0					-0.119825	-0.16902	-0.0311418	-0.106662	-0.564799	-0.320283	-0.14019	-0.341757
Q15067	ACOX1	0					0.0968256	-0.00953555	0.136614	0.0746346	0.00477201	0.0642591	0.106854	0.0586282
P04183	TK1	0					-0.0969941	0.182372	-0.123609	-0.0127437	0.0316215	0.0849164	-0.0184021	0.0327119
Q66K89	E4F1	0					-0.326959	-0.216303	-0.116051	-0.219771	-0.24881	-0.402795	0.404435	-0.0823899
P42126	ECI1	0					0.0648444	-0.0439278	0.0422963	0.021071	0.0419268	-0.0146932	0.0876127	0.0382821
Q9NXV2	KCTD5	0					-0.132605	-0.00348651	-0.145275	-0.0937886	0.107362	0.0448558	-0.122185	0.0100108
Q9UQ35	SRRM2	0					0.187881	-0.115368	0.0997303	0.0574145	0.119687	-0.0782297	0.0362935	0.0259168
Q16531	DDB1	0					-0.106496	-0.0380216	-0.067528	-0.070682	-0.103301	-0.0318299	-0.0387793	-0.0579699
Q8TBN0	RAB3IL1	0					-0.260121	0.475419	-0.267896	-0.0175326	0.154998	-0.357841	0.339033	0.045397
Q1KMD3	HNRNPUL2-BSCL2	0					0.156843	-0.0258821	0.110501	0.0804871	0.00228041	0.0525802	0.0982705	0.0510437
P62487	POLR2G	0					0.0105874	-0.289742	-0.234911	-0.171355	-0.138821	0.143591	-0.15103	-0.0487534
Q14247	CTTN	0					-0.0174748	0.0931869	0.0959872	0.0572331	0.164021	0.149142	0.134727	0.149297
Q96KB5	PBK	0					-0.33488	0.059923	-0.398899	-0.224619	-0.0918788	-0.0841562	-0.319474	-0.16517
Q9H6X2	ANTXR1	1	+				0.208183	0.0779594	0.244746	0.176963	0.138488	0.160838	0.15926	0.152862
P51608	MECP2	0					0.40362	0.0655944	0.211568	0.226928	0.177662	0.124343	0.169818	0.157274
Q86TM6	SYVN1	5	+				0.301244	-0.0405378	0.0147522	0.0918193	0.12239	0.243237	0.0842188	0.149948
Q8N3V7	SYNPO	0					0.240497	0.150582	0.282913	0.224664	0.0780948	-0.164667	0.0536127	-0.0109867
P62310	LSM3	0					-0.0655311	-0.00850765	-0.0868524	-0.0536304	0.00601954	-0.0896656	-0.0858632	-0.0565031
Q9Y2S0	POLR1D	0					0.539791	0.0334827	0.0774511	0.216908	-0.139197	0.161244	0.0405352	0.0208605
Q02750	MAP2K1	0					0.00763847	0.380891	0.29799	0.22884	0.386529	0.443525	0.293987	0.374681
O75367	H2AFY	0					0.226442	-0.103985	0.0472662	0.0565743	0.0351191	-0.0767773	-0.00492141	-0.0155266
P08236	GUSB	0	+				-0.139856	-0.446243	-0.330322	-0.305474	-0.722246	-0.700707	-0.897945	-0.773633
Q9H074	PAIP1	0					-0.0463641	0.208665	0.109964	0.0907551	0.149244	0.168569	-0.00850211	0.103104
Q9BVS5	TRMT61B	0					0.0384835	-0.225953	0.0698185	-0.0392169	-0.0749686	0.012313	0.162597	0.0333139
Q7L5Y9	MAEA	0					-0.0371411	0.0611365	-0.0322488	-0.00275114	0.120362	-0.177167	-0.196388	-0.0843975
Q9UQ80	PA2G4	0					-0.0884208	-0.0207937	-0.0648256	-0.0580134	-0.0289142	-0.0128993	-0.0838531	-0.0418888
P31350	RRM2	0					-0.377366	-0.0327232	-0.284039	-0.231376	-0.125686	-0.00542333	-0.0981138	-0.0764078
P34932	HSPA4	0					-0.122627	0.139289	0.0582573	0.024973	0.0169812	0.114627	-0.0144503	0.0390525
O15379	HDAC3	0					0.0159101	-0.343512	-0.0908989	-0.1395	-0.28912	-0.0770415	-0.131581	-0.165914
Q6UN15	FIP1L1	0					0.369287	0.173407	0.112631	0.218441	0.0415004	0.142452	-0.0677983	0.0387182
Q15046	KARS	0					-0.0708972	-0.0473099	-0.0456836	-0.0546302	-0.0632203	-0.0206113	-0.0288879	-0.0375732
P49755	TMED10	1	+				0.112833	0.0221477	0.157594	0.0975248	0.037881	0.0906762	0.166764	0.0984404
P31153	MAT2A	0					-0.316362	0.0591145	-0.205904	-0.154384	-0.100019	-0.015796	-0.158809	-0.0915412
Q8NBP7	PCSK9	0	+				-0.0501046	-0.0331022	0.0110674	-0.0240465	-0.0633194	0.0788559	0.186537	0.0673577
Q9Y6C9	MTCH2	3					-0.0299267	-0.16902	-0.0658253	-0.0882572	-0.122931	-0.103348	-0.0667811	-0.0976866
P17275	JUNB	0				+	0.673059	0.464942	0.508065	0.548689	0.632027	0.587312	0.667473	0.628938
Q7Z4W1	DCXR	0					-0.107041	-0.135869	-0.116541	-0.119817	-0.345799	-0.190658	-0.211195	-0.249217
Q12907	LMAN2	1	+				0.16103	0.115003	0.260763	0.178932	0.163441	0.183443	0.22963	0.192171
P49354	FNTA	0					-0.157093	0.170247	-0.191863	-0.0595695	-0.104361	0.0247318	-0.00757462	-0.0290678
Q29RF7	PDS5A	0					0.114227	-0.0520564	0.00839169	0.0235209	-0.0192382	-0.0510536	-0.0281042	-0.0327987
Q9H5U6	ZCCHC4	0					0.373183	-0.127846	-0.168909	0.025476	0.224206	0.522196	0.434154	0.393519
	BAHCC1						-0.0180536	-0.1308	0.180496	0.0105472	-0.196898	-0.108785	-0.128415	-0.144699
Q8N4T8	CBR4	0					0.154623	0.038918	0.162422	0.118654	0.0528435	0.00320821	0.182675	0.0795757
Q16134	ETFDH	0					-0.123596	-0.274965	-0.0408249	-0.146462	0.0601673	-0.105033	-0.0308456	-0.0252371
Q8IV38	ANKMY2	0					-0.343404	-0.0405378	-0.260185	-0.214709	-0.268719	-0.137567	-0.143933	-0.183406
Q08752	PPID	0					-0.188287	0.241074	0.0833066	0.0453644	0.0686143	0.160823	0.0592933	0.0962435
Q6IBS0	TWF2	0					-0.145166	0.165062	0.102029	0.0406419	0.0734011	0.103941	-0.00770723	0.056545
Q8NBZ0	INO80E	0					-0.0426136	-0.0349963	0.0940825	0.00549088	0.18612	0.0908839	0.148203	0.141736
A0PJW6	TMEM223	2					0.663356	0.396497	0.574584	0.544812	-0.145203	0.366335	0.411418	0.21085
Q9BTV4	TMEM43	4	+				0.137761	-0.00966393	0.18786	0.105319	0.0497314	0.0874159	0.162433	0.0998602
Q8TDD1	DDX54	0					0.158935	-0.0979575	0.0346888	0.0318887	-0.0286098	-0.0812619	-0.0859887	-0.0652868
Q5T0W9	FAM83B	0					0.08758	0.12512	0.187898	0.133533	0.0668777	-0.135539	0.00681126	-0.0206166
Q9UDY8	MALT1	0					0.0353572	0.220457	-0.0476425	0.0693905	0.18118	0.245465	0.200493	0.209046
P49773	HINT1	0					-0.0986369	0.262641	-0.0524454	0.0371863	0.178013	0.216587	0.062629	0.15241
Q9NQ92	COPRS	0					-0.235643	-0.0637311	-0.302648	-0.200674	0.0627611	-0.0416091	0.129514	0.050222
P52888	THOP1	0					-0.200273	0.12174	-0.224881	-0.101138	-0.0420509	0.0287059	-0.0861142	-0.0331531
P49327	FASN	0					-0.545234	-0.165105	-0.403832	-0.37139	-0.370122	-0.297111	-0.441736	-0.369657
P35221	CTNNA1	0					-0.203432	-0.0317117	-0.136223	-0.123789	-0.0982784	-0.0784937	-0.157018	-0.111263
Q96EK4	THAP11	0					-0.159718	-0.16948	0.0148735	-0.104775	-0.149692	-0.253132	-0.103457	-0.16876
Q92989	CLP1	0					-0.113664	-0.106149	-0.20966	-0.143158	-0.0735912	-0.0824466	-0.00292831	-0.0529887
P23919	DTYMK	0					-0.0326794	0.197474	0.127052	0.097282	0.00259151	0.201898	0.133192	0.11256
Q8WVJ2	NUDCD2	0					-0.168296	0.383435	-0.0055447	0.0698648	0.0999057	0.128983	0.0500218	0.0929701
Q9BX10	GTPBP2	0					0.0860863	0.292558	0.277188	0.218611	0.113735	0.135289	0.268936	0.172653
Q9GZY8	MFF	1					0.347782	0.115283	0.372036	0.278367	0.342135	0.390842	0.38407	0.372349
Q9BUT9	MCRIP2	0					-0.211653	-0.144316	-0.189083	-0.181684	-0.194275	0.502365	-0.217511	0.0301926
Q96N64	PWWP2A	0					3.19489	-0.298598	0.149831	1.01538	0.638139	-0.353704	-0.0854865	0.0663163
Q9BRZ2	TRIM56	0					0.021253	0.185618	0.0962989	0.101057	-0.0712275	0.0464376	-0.00585057	-0.0102135
P49458	SRP9	0					0.048267	-0.0216855	0.0786456	0.0350757	-0.0540718	-0.004868	0.031247	-0.00923091
Q9UNK0	STX8	1	+				0.460754	-0.0922688	0.176033	0.181506	-0.512469	1.0562	-0.75139	-0.0692206
Q8N6T7	SIRT6	0					0.277665	0.0131173	0.0909564	0.127246	0.135072	-0.0786256	0.0760496	0.0441653
P17676	CEBPB	0					0.385072	0.314336	0.213257	0.304222	0.206531	0.368654	0.357795	0.310993
P83436	COG7	0					-0.0379405	0.095119	-0.13152	-0.0247803	0.114071	0.266008	0.0694637	0.149848
Q8NE01	CNNM3	4	+				0.056532	0.148717	0.108041	0.10443	-0.0699453	0.03483	0.199651	0.0548454
Q96MW5	COG8	0					0.353297	0.2012	0.0652368	0.206578	0.478195	0.126349	0.174081	0.259542
P39748	FEN1	0					-0.0835622	0.0279357	-0.103147	-0.0529244	0.0202334	0.0117511	0.00079967	0.0109281
Q9BVQ7	SPATA5L1	0					0.0168586	0.208994	0.0373961	0.0877496	0.0634102	0.103776	0.0377973	0.068328
Q15365	PCBP1	0					-0.176616	0.0494491	-0.129044	-0.0854038	-0.0684645	-0.0269154	-0.0712267	-0.0555355
O95202	LETM1	1					0.0740683	-0.0603874	0.050157	0.0212793	-0.082324	-0.0799443	0.0105643	-0.050568
Q86VS8	HOOK3	0					-0.0569938	0.10454	-0.0242118	0.0077782	0.180124	0.12451	0.0747861	0.126473
Q9HCP0	CSNK1G1	0	+				-0.0490854	0.135876	0.22169	0.102827	-0.129289	0.0425581	-0.0174811	-0.0347373
Q15393	SF3B3	0					0.00669623	-0.0729789	0.0325477	-0.011245	-0.09353	-0.0821834	-0.0511773	-0.0756302
Q7Z2K8	GPRIN1	0					1.03516	0.855567	-0.288398	0.534111	0.265066	0.012032	0.238547	0.171881
Q14103	HNRNPD	0					0.0762909	0.0511895	0.115321	0.080934	0.0113334	0.033546	0.0156735	0.0201843
Q15059	BRD3	0					0.175518	-0.198387	-0.138671	-0.0538465	-0.0254588	-0.186624	0.0430041	-0.0563596
P31948	STIP1	0					-0.162967	0.0826066	-0.0218663	-0.0340756	-0.000414108	0.110439	-0.0274506	0.0275248
P56385	ATP5I	0					0.0702487	-0.16948	-0.00871821	-0.035983	-0.12274	0.0131564	-0.0635974	-0.0577272
P18085	ARF4	0					0.0722188	0.241013	0.110001	0.141078	0.353206	0.310739	0.242009	0.301984
Q9HC36	MRM3	0					0.137117	-0.190138	0.0161734	-0.0122827	-0.128247	-0.120495	-0.169866	-0.139536
Q8N5M9	JAGN1	4	+				0.25763	-0.0697797	0.0548336	0.0808945	0.0288718	-0.0236296	0.124712	0.0433181
Q9NUU7	DDX19A	0					-0.143681	0.154893	-0.0741882	-0.0209919	0.0972442	0.101861	-0.0386496	0.0534853
Q9BSK2	SLC25A33	6	+				-0.376283	-0.276567	-0.210239	-0.287696	-0.0743785	0.0632395	-0.0511773	-0.0207721
P61981	YWHAG	0					-0.0102775	0.29503	0.132417	0.139057	0.239042	0.313662	0.245811	0.266172
P47985	UQCRFS1	1					-0.00608198	-0.160948	-0.0168926	-0.0613074	-0.110609	-0.111496	-0.0248336	-0.0823128
Q8NEM2	SHCBP1	0					-0.032794	0.0270134	-0.045069	-0.0169499	0.012691	0.0418408	-0.0477011	0.00227692
Q9H082	RAB33B	0					0.109162	0.567984	-0.0117145	0.221811	-0.0456676	0.205765	0.110158	0.090085
Q9BYD1	MRPL13	0					-0.05812	-0.00773636	-0.0446035	-0.03682	-0.137692	-0.12625	-0.175068	-0.146337
O43447	PPIH	0					-0.039652	-0.0466842	0.0903722	0.00134535	-0.0950822	-0.0888799	-0.0458953	-0.0766191
O14715	RGPD8	0					-0.549966	-0.379635	0.00298648	-0.308871	-0.537088	0.440308	-0.0649991	-0.0539264
Q9BRJ7	NUDT16L1	0					-0.0711203	-0.331438	-0.356405	-0.252988	-0.413379	-0.38167	-0.421087	-0.405379
O15297	PPM1D	0					-3.49231	0.435025	-2.88638	-1.98122	0.308655	-0.00708802	-0.190212	0.0371185
Q9NQS1	AVEN	0					0.111693	0.0801445	-0.028152	0.0545617	-0.0450654	0.0929033	0.152832	0.0668901
Q9H061	TMEM126A	4					0.0435482	-0.094329	0.0881467	0.0124553	-0.108017	-0.0208858	-0.0838531	-0.0709186
Q9P0P0	RNF181	0					-0.0106266	0.155613	-0.34092	-0.0653112	-0.208865	0.064973	-0.189277	-0.111056
Q9ULM3	YEATS2	0					-0.0330232	-0.305624	-0.124239	-0.154295	-0.50978	-0.379636	-0.110015	-0.333144
Q56NI9	ESCO2	0					0.28493	-0.1023	0.0530358	0.0785553	-0.285301	-0.0821834	0.0986984	-0.0895954
P34741	SDC2	1	+				-0.150138	-0.379436	-0.244075	-0.257883	-0.278145	-0.370289	-0.260189	-0.302874
Q8WUR7	C15orf40	0					0.0648444	0.513466	0.198189	0.258833	0.391412	0.451315	0.162552	0.335093
P33176	KIF5B	0					-0.0703391	0.0959478	-0.0480903	-0.00749388	0.0776574	0.172395	-0.0118097	0.0794143
Q9BTL3	FAM103A1	0					0.17565	-0.910945	0.12664	-0.202885	-0.142203	0.0568924	0.0585994	-0.00890389
Q9NZJ5	EIF2AK3	1	+				0.187881	-0.226395	-0.480797	-0.173104	0.102238	0.0183678	0.299552	0.140053
Q8IU81	IRF2BP1	0					-0.174125	-0.0835105	-0.117948	-0.125195	-0.0518753	-0.0698915	-0.068561	-0.0634426
Q8N122	RPTOR	0	+				-0.166104	0.0299143	-0.0258464	-0.0540121	-0.0944033	0.0607527	-0.00518702	-0.0129459
P33993	MCM7	0					-0.117342	-0.0936023	-0.101677	-0.104207	-0.18747	-0.131093	-0.119734	-0.146099
Q969G5	CAVIN3	0					0.321606	0.25537	0.432003	0.336326	0.177544	0.201129	0.191306	0.189993
Q8NCH0	CHST14	1	+				0.257349	0.073191	0.0773608	0.135967	-0.155654	1.58048	-0.111248	0.43786
Q9UK73	FEM1B	0					-0.25286	-0.486571	-0.217099	-0.318844	0.0222303	-0.735348	-0.43997	-0.384363
Q9NYD6	HOXC10	0					-0.180345	-0.111902	-0.261473	-0.184573	-0.0874018	-0.264195	-0.28599	-0.212529
Q8WUM4	PDCD6IP	0					-0.190138	0.151874	-0.0952874	-0.0445171	0.0498386	0.0969208	-0.0184021	0.0427858
Q10469	MGAT2	1	+				-0.0170115	-0.124291	0.0771074	-0.0213984	0.221305	0.153878	0.176488	0.18389
Q96I99	SUCLG2	0					0.0970763	-0.138808	-0.0132785	-0.0183366	-0.00650985	-0.00375677	-0.0578488	-0.0227051
Q8TAF3	WDR48	0					-0.0898533	0.107323	-0.0317793	-0.00476992	0.0870876	-0.139718	-0.0452498	-0.0326268
Q15818	NPTX1	0	+				-0.280046	-0.34748	-0.131457	-0.252994	-0.449777	-0.33328	-0.393358	-0.392138
P47897	QARS	0	+				-0.0691106	-0.0385251	-0.0599816	-0.0558725	-0.0949854	-0.0677662	-0.0565683	-0.0731066
Q8N3Y7	SDR16C5	2	+				0.574173	0.462143	0.397942	0.478086	0.497132	0.252385	0.936097	0.561871
Q96JG6	VPS50	0					0.0266155	0.138008	-0.123908	0.0135717	0.0119598	0.100979	-0.0728744	0.013355
P10412	HIST1H1E	0					0.33191	-0.0504344	0.0319164	0.104464	0.116652	-0.0378139	0.086622	0.0551532
Q8NEZ5	FBXO22	0					-0.364405	0.0118131	0.0495536	-0.101013	-0.268117	0.0596778	-0.0237857	-0.0774084
Q14919	DRAP1	0					0.0394469	0.225406	-0.205384	0.0198229	0.161586	0.0295587	0.0158084	0.0689844
O14618	CCS	0					0.0117684	-0.153295	0.690501	0.182992	-0.614553	0.134769	0.286476	-0.0644361
Q8IWJ2	GCC2	0					0.116132	0.150869	0.19377	0.15359	0.206291	0.250743	0.244532	0.233855
P13639	EEF2	0					-0.18839	0.183899	-0.084639	-0.0297101	0.0705707	0.12237	-0.0184021	0.0581797
O95568	METTL18	0					-0.14739	0.125543	-0.26133	-0.0943923	-0.463737	0.0202036	-0.101968	-0.181834
Q9UNX4	WDR3	0					0.0748088	-0.0723643	0.0246774	0.00904066	-0.0929474	-0.148795	-0.00332714	-0.0816899
Q8N668	COMMD1	0					-0.183754	-0.359723	-0.0676588	-0.203712	-0.281301	-0.397833	0.0809736	-0.199387
Q9BVG9	PTDSS2	7	+				-0.570631	-0.493659	-0.277405	-0.447232	-0.433381	-0.905729	-0.67942	-0.672844
Q96DV4	MRPL38	0					0.0358378	-0.0838764	-0.00764403	-0.0185609	-0.0167833	-0.0676333	-0.0691961	-0.0512042
Q9BRU9	UTP23	0					0.41783	-0.0210486	-0.0153496	0.127144	0.224206	0.15546	0.299273	0.226313
Q99766	ATP5S	0					0.111566	-0.223076	-0.214324	-0.108611	-0.142485	0.0548937	-0.265519	-0.117703
Q8NB16	MLKL	0					-0.0388534	0.361178	-0.00571537	0.105536	0.214199	0.308718	0.0710024	0.197973
Q9Y2U8	LEMD3	2					0.135442	-0.0362576	0.100245	0.0664766	0.0975766	-0.0784937	0.214215	0.0777659
Q71UI9	H2AFV	0					-0.00573177	-0.139395	-0.106877	-0.0840012	-0.180542	-0.163051	-0.113836	-0.152476
Q9UBS0	RPS6KB2	0					-0.200885	-0.0227038	-0.25416	-0.159249	-0.0218928	-0.122416	-0.087745	-0.0773512
	CYB5B		+				-0.06385	-0.149454	-0.0369528	-0.0834189	-0.0926561	-0.0513225	0.00975926	-0.0447398
P01116	KRAS	0					0.0299622	-0.256577	-0.116114	-0.114243	-0.188743	-0.200998	-0.0496333	-0.146458
Q16643	DBN1	0					-0.106061	-0.2755	-0.0559629	-0.145841	-0.242959	-0.28527	-0.15187	-0.2267
Q7L2J0	MEPCE	0					0.264371	-0.0854614	0.109908	0.0962727	0.109818	-0.00722664	0.14974	0.0841104
Q9UHR6	ZNHIT2	0					-0.0562049	0.251917	-0.0567378	0.0463249	0.252427	-0.0466088	-0.128171	0.0258823
Q96GC5	MRPL48	0					0.0616604	-0.134692	0.0354091	-0.0125407	-0.109458	-0.15769	-0.0584886	-0.108546
Q9NYL9	TMOD3	0					0.0631291	0.234883	0.144742	0.147585	0.139856	0.153382	0.1178	0.137013
P41440	SLC19A1	12	+				-0.0207134	-0.294282	-0.103306	-0.139434	-0.278828	-0.186869	-0.156061	-0.207253
Q9Y3B7	MRPL11	0					0.0153177	-0.121561	-0.0382057	-0.0481495	-0.125876	-0.103089	-0.0404644	-0.0898097
Q96JH7	VCPIP1	0					-0.152566	-0.000258513	-0.0664477	-0.0730906	-0.0150422	0.101906	-0.179428	-0.0308545
O43505	B4GAT1	1	+				0.384124	0.123992	0.349425	0.285847	0.12951	0.163879	-0.0116775	0.0939037
Q6L8Q7	PDE12	0					0.0661935	0.0562889	-0.0329529	0.0298432	-0.0485745	-0.0490349	-0.0634698	-0.0536931
Q15386	UBE3C	0					-0.120904	0.181683	-0.0884659	-0.00922894	0.00508395	-0.0336005	-0.0377413	-0.0220859
Q86UV5	USP48	0					-0.253155	-0.199851	-0.349828	-0.267611	-0.355707	-0.428282	-0.254057	-0.346015
Q9Y2K7	KDM2A	0					0.231524	0.126812	0.178108	0.178815	0.0734011	-0.0363203	0.110589	0.0492233
Q96S52	PIGS	2	+				-0.0480655	-0.00219617	0.171875	0.0405377	-0.165291	-0.10581	-0.0100907	-0.0937307
Q86VR2	RETREG3	3					0.0390855	-0.0294334	0.130163	0.0466051	0.0893996	0.116725	0.206461	0.137528
Q99460	PSMD1	0					0.0242297	0.138435	0.0973439	0.0866694	0.0176101	0.139856	0.0861976	0.0812212
Q96B01	RAD51AP1	0					-0.17371	-0.194212	-0.392513	-0.253478	-0.304968	-0.17926	-0.254057	-0.246095
P51610	HCFC1	0					0.0626393	-0.141271	0.0881103	0.00315939	-0.0450654	-0.350538	0.0941402	-0.100488
Q5XKP0	C19orf70	1	+				0.171552	0.00258808	-0.0709272	0.0344043	-0.127109	0.0792237	0.171483	0.0411991
P07919	UQCRH	0					0.0865841	-0.0619984	0.0378363	0.0208073	-0.0617326	-0.0753235	-0.0180075	-0.0516879
Q14C86	GAPVD1	0					-0.240214	0.12174	-0.141487	-0.0866539	0.0370306	0.116015	0.00453716	0.0525276
P17612	PRKACA	0					-0.145695	0.0141615	-0.0812395	-0.0709245	-0.0499759	-0.0090277	-0.156778	-0.0719274
Q96RR1	TWNK	0					0.0223238	-0.0641022	0.0465755	0.00159904	0.362896	-0.468107	0.32023	0.071673
Q96IZ6	METTL2A	0					0.0288856	0.395119	0.00785709	0.143954	-0.0220968	0.353515	0.315978	0.215799
Q8NBI6	XXYLT1	1	+				0.0532446	-0.0324703	-0.0327517	-0.00399244	-0.054371	-0.0422857	0.0186398	-0.0260056
O75427	LRCH4	0	+				0.86885	-0.352349	1.02985	0.51545	-0.278486	-0.656313	-0.643366	-0.526055
A1X283	SH3PXD2B	0					-0.108129	0.366652	0.23529	0.164604	0.261337	0.445573	0.314337	0.340416
Q6P0N0	MIS18BP1	0					0.102477	-0.240362	-0.793802	-0.310562	-0.21003	-0.267092	-0.257294	-0.244805
Q96FC9	DDX11	0					-0.278211	-0.327425	-0.393035	-0.33289	-0.399392	-0.636733	-0.494704	-0.510277
P78536	ADAM17	1	+				0.381114	-0.0213033	-0.0280846	0.110575	0.0731832	0.0359723	0.0799876	0.0630477
Q15326	ZMYND11	0					0.060071	-0.0690405	-0.0641535	-0.0243743	-0.178987	-0.229203	-0.10779	-0.171994
Q969S3	ZNF622	0					0.0138972	0.198334	-0.0111022	0.0670429	0.0594116	0.0820821	0.00935692	0.0502836
Q96C90	PPP1R14B	0					-0.181482	0.149721	-0.087611	-0.0397907	-0.06629	0.192187	-0.26862	-0.047574
Q13200	PSMD2	0					-0.00491442	0.172008	0.0839063	0.0836666	0.111719	0.150023	0.0749264	0.112223
Q6UXD5	SEZ6L2	1	+				0.377744	0.0122042	0.338197	0.242715	0.403553	0.0825688	0.372605	0.286242
Q9H0U4	RAB1B	0					0.116767	0.133321	0.143624	0.131237	0.0618961	0.0676425	0.200202	0.109914
P0C2W1	FBXO45	0					-0.22425	-0.000387787	-0.0738136	-0.0994838	-0.116831	-0.135158	-0.088121	-0.11337
O43290	SART1	0					0.25078	0.0150756	0.118203	0.12802	0.127359	0.0158302	0.0823836	0.0751908
Q07960	ARHGAP1	0	+				0.116132	0.283985	0.286171	0.228763	0.167623	0.185644	0.227647	0.193638
Q92889	ERCC4	0					-0.0193263	0.0016817	-0.166864	-0.0615029	-0.0769337	0.123008	0.0818197	0.0426312
P62195	PSMC5	0					0.0419788	0.158944	0.0850698	0.0953307	0.0887388	0.150812	0.0655542	0.101702
Q9H1K1	ISCU	0					0.0395674	-0.0914196	0.0246252	-0.00907567	-0.0780133	-0.0495735	-0.0565683	-0.061385
Q8N1F7	NUP93	0					-0.024521	-0.0833883	-0.0363176	-0.0480756	-0.0922675	-0.112011	-0.0534902	-0.085923
Q9BUQ8	DDX23	0					0.15972	-0.108189	0.00472282	0.0187513	-0.0111421	-0.141361	-0.1042	-0.0855679
Q9BQC6	MRPL57	0					0.0693876	-0.149454	0.159297	0.0264103	0.137804	-0.121392	-0.0448624	-0.00948332
P09497	CLTB	0					0.104366	0.115143	0.191007	0.136839	0.0782039	0.0904833	0.0912985	0.0866619
Q5VWQ8	DAB2IP	0					0.244795	0.370174	0.457204	0.357391	0.33441	0.654344	0.292339	0.427031
Q9NVI1	FANCI	0					-0.296268	-0.162335	-0.169748	-0.20945	-0.13477	-0.138706	-0.161194	-0.14489
O15446	CD3EAP	0					0.290223	-0.0485604	0.0982797	0.113314	0.0170859	-0.111882	0.0239132	-0.0236278
Q8IWW6	ARHGAP12	0					-0.556037	-0.00322854	-0.184534	-0.247933	0.0941455	0.00642333	-0.105316	-0.00158222
Q8N573	OXR1	0					-0.153093	-0.377945	-0.114706	-0.215248	-0.657405	0.0737734	0.00226684	-0.193788
Q8IY37	DHX37	0					0.182018	-0.0822898	0.0422787	0.0473358	0.139172	-0.00306179	-0.022212	0.0379661
Q8WV41	SNX33	0					-0.198129	-0.0446801	-0.0391405	-0.0939831	-0.102047	0.21003	0.191975	0.099986
P36578	RPL4	0					0.112199	-0.0707648	-0.0491514	-0.00257235	0.0526286	-0.0452593	-0.0452498	-0.0126268
P20340	RAB6A	0					0.0949467	0.132045	0.204656	0.143882	0.194511	0.13066	0.263567	0.196246
Q96T23	RSF1	0					0.109794	-0.173956	-0.0120886	-0.0254168	-0.0119639	-0.131093	0.0287984	-0.0380862
O95271	TNKS	0					-1.24606	-0.0281661	-0.136972	-0.470398	-0.177523	-0.122416	-0.192429	-0.164122
Q12972	PPP1R8	0					0.105626	-0.00953555	0.0823986	0.0594965	-0.0406419	0.0766357	-0.0157688	0.00674167
O95747	OXSR1	0					-0.165059	0.19915	-0.0248018	0.0030963	0.0425668	0.166801	-0.0287573	0.0602034
Q86Y39	NDUFA11	2					0.0762909	-0.00619235	0.15924	0.0764461	0.108031	-0.0304664	-0.0416299	0.0119782
Q96PK6	RBM14	0					0.136472	0.0329534	0.124956	0.0981273	-0.027594	0.0414105	0.0486432	0.0208199
Q5H8A4	PIGG	12	+				0.143317	0.106627	-0.163423	0.0288401	-0.0968264	-0.0497081	0.191306	0.0149237
Q5T9A4	ATAD3B	0					0.373016	0.0896056	0.0210366	0.161219	-0.0584544	0.0996949	-0.087745	-0.0155015
P38117	ETFB	0					0.149154	0.0533345	0.124264	0.108918	0.111719	0.131148	0.19234	0.145069
Q9UJY4	GGA2	0					-0.146437	0.039848	-0.400848	-0.169146	-0.205546	-0.101531	-0.191379	-0.166152
Q96G46	DUS3L	0					-0.174229	0.0410446	-0.0312593	-0.0548146	-0.18747	-0.183192	-0.164407	-0.178357
Q8IW45	NAXD	0					0.364299	0.0208353	0.224712	0.203282	0.471287	-0.19845	0.183401	0.152079
Q9UHB9	SRP68	0					0.0806225	0.00712824	0.0654161	0.0510556	-0.00929095	0.014563	0.112172	0.0391481
P55735	SEC13	0					-0.0499915	-0.019136	-0.0116634	-0.0269303	0.126228	0.133622	0.0849253	0.114925
Q68CZ2	TNS3	0					-0.0909542	0.138862	0.0195933	0.0225002	-0.0170906	0.0666209	-0.15642	-0.0356298
Q9BRR6	ADPGK	0	+				0.143187	0.00155217	0.20897	0.117903	0.038519	-0.0251365	0.177664	0.063682
Q16836	HADH	0					-0.0590204	-0.187189	-0.0663166	-0.104175	-0.227119	-0.211745	-0.170221	-0.203028
P51580	TPMT	0					-0.274436	0.112206	-0.223942	-0.128724	-0.0787	-0.221337	-0.39741	-0.232482
Q9H2W6	MRPL46	0					0.106131	-0.160022	0.0766734	0.00759403	-0.0528742	-0.0303301	0.0129822	-0.0234074
O60232	SSSCA1	0					-0.046137	-0.0270244	-0.0624467	-0.0452027	0.206053	0.204818	0.0606824	0.157184
Q7L0Y3	TRMT10C	0					0.102225	-0.0277857	0.137123	0.0705209	-0.0714245	0.00418583	0.0672284	-3.44433e-06
Q5T5Y3	CAMSAP1	0					0.240635	0.443562	0.211429	0.298542	0.0113334	-0.0288286	0.491836	0.158114
Q6UVK1	CSPG4	1	+				-0.00503109	-0.101577	0.0596506	-0.0156525	-0.204558	-0.105033	-0.000532901	-0.103375
Q9BUB7	TMEM70	2					0.0775272	0.0596534	0.0584181	0.0651996	0.0715499	0.0068431	0.0689045	0.0490992
Q9H845	ACAD9	0					0.0427029	-0.0772742	0.0989774	0.0214687	-0.0404404	0.00922483	-0.0451207	-0.0254454
Q5SSJ5	HP1BP3	0					0.285073	-0.113337	0.00608257	0.0592725	0.143398	0.00264971	0.0425924	0.0628801
P42575	CASP2	0					-0.400193	-0.193534	-0.469325	-0.354351	-0.320146	-0.133889	-0.543513	-0.332516
Q8N3D4	EHBP1L1	0					-0.138154	-0.171318	-0.00436567	-0.104612	-0.102818	-0.0853386	-0.13012	-0.106092
Q15545	TAF7	0					0.0151993	-0.0192636	-0.174313	-0.0594592	0.00643566	-0.114459	0.0054731	-0.0341833
Q9UNP9	PPIE	0					0.0622721	-0.0243574	0.0644655	0.0341268	-0.0521751	0.0124535	0.0105643	-0.00971909
Q9NQX3	GPHN	0					-0.267735	0.130063	-0.281079	-0.139584	0.0189737	0.0468692	-0.11396	-0.0160389
P04899	GNAI2	0					-0.0311891	-0.0872879	-0.00422888	-0.040902	-0.165753	-0.126761	-0.0412415	-0.111252
Q9H361	PABPC3	0					-0.0599201	0.0425087	-0.00977431	-0.00906189	-0.024848	0.0132969	-0.0409825	-0.0175112
Q8WVB6	CHTF18	0					-0.217209	0.0137697	-0.0752302	-0.0928899	0.025073	-0.0988017	0.0313832	-0.0141152
O75323	NIPSNAP2	0					0.0239912	0.0562889	-0.0410915	0.0130629	-0.0471719	-0.110593	0.0898797	-0.0226283
Q9H4A3	WNK1	0					-0.140069	-0.0010339	-0.092299	-0.0778007	-0.00516899	-0.0364562	-0.0931261	-0.0449171
Q96QE3	ATAD5	0					0.15972	-0.191158	0.0425434	0.00370205	-0.0803662	-0.205958	-0.204504	-0.16361
Q14103	HNRNPD	0					0.0818624	-0.0853395	0.108817	0.0351133	-0.0164762	-0.0311484	0.00841853	-0.0130687
P98082	DAB2	0					0.0870819	0.174734	0.251793	0.171203	0.0963582	0.0895045	0.116282	0.100715
P78527	PRKDC	0					0.0686499	-0.0132553	0.0795694	0.044988	0.0438473	0.0726887	0.149976	0.0888375
Q9UBQ7	GRHPR	0					-0.0472717	0.162672	-0.0351299	0.026757	0.0447016	0.0399774	0.0143272	0.0330021
A0AVT1	UBA6	0					-0.225654	0.150725	-0.0545106	-0.0431464	0.126002	0.240024	0.047541	0.137856
O15067	PFAS	0					-0.361762	-0.0378957	-0.308336	-0.235998	-0.15807	-0.141361	-0.267292	-0.188908
Q13098	GPS1	0					-0.157303	0.0417099	-0.0266041	-0.047399	-0.0830086	0.00111505	-0.0719873	-0.0512936
Q8N4H5	TOMM5	1					0.0807465	0.220095	0.0553857	0.118742	0.00622745	0.00992615	0.0801284	0.032094
Q96DH6	MSI2	0					-0.07791	0.0014228	0.0386108	-0.0126255	-0.0169882	0.0654395	0.0191799	0.0225437
O43805	SSNA1	0					0.155406	0.197236	0.182246	0.178296	-0.0216888	-0.256285	-0.202306	-0.160093
Q07666	KHDRBS1	0					0.214561	-0.10242	0.0050843	0.039075	0.144199	-0.026505	0.0133855	0.0436932
Q9NTI5	PDS5B	0					0.208183	-0.0649675	0.0865984	0.0766046	0.0329983	-0.00791957	0.0494702	0.0248496
Q9BQQ3	GORASP1	0					0.140472	-0.026263	0.370972	0.161727	-0.449853	1.15168	0.348299	0.350041
Q6P3X3	TTC27	0					-0.35948	0.0475773	-0.215904	-0.175936	-0.0400376	-0.190536	-0.240475	-0.157016
Q9UJX6	ANAPC2	0					-0.0536098	0.0171673	0.0176655	-0.00625904	-0.344168	-0.220381	-0.138254	-0.234267
O60884	DNAJA2	0					-0.13826	0.0402467	-0.117521	-0.0718448	-0.10869	-0.0724114	-0.179192	-0.120098
Q13177	PAK2	0					-0.119286	0.386846	-0.0075588	0.0866671	0.163557	0.239301	0.0282548	0.143704
P19532	TFE3	0					-0.0558667	0.148717	0.521834	0.204895	0.101571	0.249848	0.233494	0.194971
Q8IWA0	WDR75	0					0.113466	-0.012999	0.00532506	0.0352642	-0.043157	-0.0883558	0.0339727	-0.0325134
Q13206	DDX10	0					0.269166	-0.0444293	0.107634	0.11079	0.0409676	-0.0661702	0.00159958	-0.00786767
Q6P2P2	PRMT9	0					-0.709777	-0.389143	-0.337396	-0.478772	-0.257673	0.1304	0.184855	0.0191939
O43708	GSTZ1	0					0.127738	0.0354688	0.0600974	0.0744348	0.198427	0.261892	-0.134132	0.108729
Q9UBP6	METTL1	0					-0.366498	0.133746	-0.261616	-0.164789	-0.163628	0.538131	-0.270278	0.0347417
O14976	GAK	0					-0.204754	0.0439741	-0.106384	-0.0890546	-0.0776209	-0.0170357	-0.175894	-0.0901834
Q9BZF9	UACA	0					0.422865	0.267349	0.313589	0.334601	0.363029	0.39949	0.275452	0.34599
P51688	SGSH	0	+				-0.140813	-0.212515	-0.267611	-0.20698	-0.292084	-1.106	-0.276671	-0.558253
Q9Y6X8	ZHX2	0					0.20886	0.163729	-0.0938904	0.0928996	0.248853	0.0984564	0.277938	0.208416
Q9H0E2	TOLLIP	0					0.110047	0.362507	0.01067	0.161075	0.00935145	0.0209101	0.151737	0.0606661
Q68D91	MBLAC2	0					0.100842	-0.0809458	0.0648779	0.0282581	0.076565	0.0868831	0.211744	0.125064
P43155	CRAT	0					0.256789	0.131478	-0.238462	0.0499354	0.833435	-0.0825781	-0.00558527	0.248424
Q9BYD6	MRPL1	0					0.326903	0.156189	0.113707	0.198933	0.117775	0.0349727	0.205032	0.11926
O95831	AIFM1	0					0.0622721	-0.0390286	0.0807476	0.0346637	-0.0641122	-0.00916606	0.0512639	-0.00733814
P26006	ITGA3	1	+				0.132355	-0.00309953	0.125554	0.0849368	-0.0599454	-0.0115177	0.0939979	0.0075116
Q92974	ARHGEF2	0					-0.00619865	0.137012	0.122695	0.084503	0.235989	0.416496	0.187492	0.279993
Q8N6S5	ARL6IP6	3					0.0347568	-0.36435	-0.247705	-0.192433	-0.384315	-0.438496	-0.264078	-0.362296
O43395	PRPF3	0					0.0750557	-0.0272783	0.0973805	0.048386	-0.0252551	-0.0697589	-0.0104876	-0.0351672
Q7Z4H8	KDELC2	0	+				-0.110302	0.00569975	0.0817635	-0.0076129	0.120249	0.126152	0.0367035	0.0943682
Q92665	MRPS31	0					0.144482	-0.0569116	0.00782254	0.0317978	0.0424601	-0.0505154	0.0683456	0.0200968
Q12830	BPTF	0					0.108404	-0.0712571	0.0567227	0.0312898	0.00570763	-0.0823151	0.0405352	-0.0120241
Q9NPD3	EXOSC4	0					0.0192324	-0.0387769	-0.0521147	-0.0238864	-0.12692	-0.15794	-0.130485	-0.138448
O60356	NUPR1	0					-0.0629528	0.34603	0.192261	0.158446	0.254526	0.394848	0.221591	0.290321
Q9UH65	SWAP70	0					0.0339166	0.327174	0.129769	0.16362	0.172984	0.192554	0.0876127	0.15105
P04818	TYMS	0					-0.270458	0.101208	-0.303204	-0.157484	-0.119598	-0.123056	-0.257405	-0.166686
Q6XZF7	DNMBP	0					-0.0372554	0.0756414	-0.10667	-0.0227614	0.0679628	0.161135	0.0432787	0.090792
Q13112	CHAF1B	0					-0.07791	-0.130918	-0.123074	-0.110634	-0.0879866	-0.0874382	-0.0446041	-0.073343
O00217	NDUFS8	0					0.124796	-0.149804	0.0754623	0.0168182	0.152003	0.0937356	0.0373871	0.0943753
	COG4						0.0231572	-0.0925113	0.252507	0.0610511	0.249469	0.460373	0.270526	0.326789
Q12996	CSTF3	0					0.0412549	-0.0545483	0.102158	0.0296215	0.0137362	0.0808143	0.104417	0.0663223
Q9Y490	TLN1	0					-0.139218	0.14271	-0.0161807	-0.00422949	0.142941	0.169509	0.0812557	0.131235
P52948	NUP98	0					0.0184011	-0.106028	-0.0256443	-0.0377572	-0.113963	-0.112785	-0.0665266	-0.097758
Q13151	HNRNPA0	0					0.110427	-0.112262	0.0303922	0.00951916	0.0264436	-0.0501119	0.0244552	0.000262317
Q96ES7	SGF29	0					0.0263767	-0.00232527	-0.064383	-0.0134438	-0.13033	-0.0827097	-0.074014	-0.0956846
P61088	UBE2NL	0					-0.16913	0.271447	-0.109343	-0.0023422	0.0485526	0.181499	0.00989335	0.0799815
O95363	FARS2	0					-0.0567684	-0.19195	-0.00624477	-0.0849877	-0.128626	-0.0922819	-0.00797232	-0.0762933
Q6VY07	PACS1	0					-0.242594	0.202478	-0.1661	-0.0687386	0.205217	0.223842	-0.0774274	0.11721
O15014	ZNF609	0					0.306278	-0.1519	0.108466	0.0876148	0.282092	-0.109431	-0.0232614	0.0497999
Q70E73	RAPH1	0					0.0814903	0.319167	0.0196107	0.140089	0.45828	0.367772	0.276662	0.367571
	GTPBP6						0.0894492	-0.0641022	0.0656672	0.0303381	-0.0738865	-0.190414	-0.347181	-0.203827
Q9UI26	IPO11	0					-0.321811	-0.000775506	-0.244408	-0.188998	-0.168705	-0.00264468	-0.159048	-0.110132
Q00169	PITPNA	0					-0.228158	0.277781	-0.172215	-0.040864	0.0532733	0.125331	0.0167515	0.0651186
Q8N196	SIX5	0					0.234141	0.12371	-0.0422575	0.105198	-0.0600448	0.100501	0.325997	0.122151
Q8IVL5	P3H2	0	+				0.0589717	-0.112142	-0.0176888	-0.0236196	0.00279905	-0.0605701	0.0268966	-0.0102915
Q9H9B4	SFXN1	5					-0.0452286	-0.185143	-0.0720043	-0.100792	-0.152117	-0.150553	-0.138012	-0.146894
O75643	SNRNP200	0					0.0133055	-0.0978367	-0.000222907	-0.0282514	-0.107344	-0.0850759	-0.0415005	-0.0779735
Q9Y4D7	PLXND1	1	+				-0.0534969	-0.0501847	0.0603298	-0.0144506	-0.0556669	-0.305704	0.0326093	-0.109587
Q8WXW3	PIBF1	0					-0.113989	0.0716956	-0.131895	-0.0580629	0.0357561	-0.0270521	0.123173	0.0439591
P08574	CYC1	1					0.103107	-0.0381474	0.0532138	0.039391	-0.0492755	-0.11214	0	-0.0538052
Q96AY3	FKBP10	0	+				0.0587275	-0.132099	-0.0292107	-0.034194	0.104909	0.0644193	0.113613	0.0943139
P17987	TCP1	0					-0.327987	-0.0877746	-0.164128	-0.193296	-0.253857	-0.181105	-0.22756	-0.220841
P42785	PRCP	0	+				-0.131963	-0.563296	-0.558645	-0.417968	-0.769793	-0.477743	-0.766428	-0.671322
P82912	MRPS11	0					0.185346	-0.00284146	0.0850698	0.0891916	-0.0653995	-0.0470135	0.134347	0.0073112
O94925	GLS	0				+	1.05067	1.24159	1.59689	1.29639	1.36562	1.44538	1.8454	1.55213
Q96FZ7	CHMP6	0					0.228225	-0.0542993	0.0677324	0.0805528	-0.219134	0.00656321	0.0890292	-0.0411804
P53611	RABGGTB	0					-0.356096	0.0131173	-0.210639	-0.184539	-0.110321	-0.0430974	-0.266074	-0.139831
Q08117	AES	0					-0.0826771	-0.247349	-0.373182	-0.234403	-0.304968	-0.32474	-0.392038	-0.340582
Q9BUL9	RPP25	0					0.119438	0.0610014	0.0892954	0.0899117	0.0367117	-0.149926	0.138491	0.00842578
Q12846	STX4	1	+				0.273409	0.354303	0.348442	0.325385	0.156267	0.157882	0.276033	0.196727
O14763	TNFRSF10B	1	+				0.188415	-0.0237217	-0.0943402	0.0234511	-0.0760496	0.070317	0.172789	0.0556855
Q7Z6E9	RBBP6	0					0.0885767	-0.094329	0.0370267	0.0104248	-0.048074	-0.08113	0.0178302	-0.0371246
Q15075	EEA1	0					0.166545	0.0711523	0.217437	0.151711	0.0535957	0.076856	0.205739	0.112063
O75116	ROCK2	0					-0.29989	-0.0361316	-0.177986	-0.171336	-0.168981	-0.171611	-0.185064	-0.175219
Q9Y3T9	NOC2L	0					0.152537	-0.0723643	0.0504412	0.0435381	-0.038425	-0.0232185	-0.0440873	-0.0352436
Q01105	SET	0					-0.333857	-0.0793559	-0.258036	-0.22375	-0.185195	-0.0917589	-0.235391	-0.170782
Q12768	WASHC5	0					0.0336766	0.0505199	-0.112804	-0.00953577	0.0575782	0.0640551	0.00413627	0.0419232
Q8IWC1	MAP7D3	0					0.0458453	-0.0235946	0.00911631	0.0104557	0.0309865	-0.0918896	-0.0422769	-0.0343934
Q96EL2	MRPS24	0					-0.0123707	-0.206253	0.0265625	-0.0640203	-0.0261707	-0.0754557	-0.0214246	-0.041017
Q13438	OS9	0	+				0.308715	0.235188	0.103668	0.215857	0.0870876	-0.0482267	0.301784	0.113548
O75569	PRKRA	0					-0.0929336	-0.129146	-0.121294	-0.114458	-0.0756567	-0.00542333	-0.0587445	-0.0466082
Q96I24	FUBP3	0					0.027332	-0.0957816	0.0404436	-0.00933534	-0.0451659	-0.0208858	-0.0139226	-0.0266581
P19338	NCL	0					0.200755	-0.0471847	0.0869261	0.0801655	0.0573627	-0.0156581	0.0283906	0.023365
Q9BRX5	GINS3	0					-0.357195	-0.197485	-0.472665	-0.342448	-0.398842	-0.174083	-0.628791	-0.400572
Q9Y265	RUVBL1	0					-0.00140578	0.0457077	0.0313908	0.0252309	-0.0302334	0.0434192	0.0327455	0.0153104
Q96IP4	FAM46A	0					-0.0741295	-0.389637	-0.434859	-0.299542	-0.416021	-0.89153	-0.49196	-0.599837
Q9NRG1	PRTFDC1	0					-0.231955	-0.043677	-0.306119	-0.193917	0.0639516	0.0678615	-0.154147	-0.00744452
Q92598	HSPH1	0					-0.015273	0.312714	0.200591	0.16601	0.167623	0.329839	0.168245	0.221902
Q9BUF5	TUBB6	0					-0.378899	0.111787	-0.162213	-0.143109	-0.0589516	-0.0200617	-0.230289	-0.103101
Q9UJX5	ANAPC4	0					-0.116478	-0.0621222	0.0383467	-0.0467511	-0.135713	0.00964549	-0.0273199	-0.0511292
Q8IUI8	CRLF3	0					-0.334787	-0.017221	-0.30792	-0.219976	0.0690488	0.158613	-0.13668	0.0303274
P34896	SHMT1	0					-0.290913	0.087956	-0.15704	-0.119999	0.102906	-0.0522633	0.0281189	0.0262537
Q96CN9	GCC1	0					-0.0837834	-0.319262	0.0122254	-0.130273	-0.177889	-0.0145553	-0.0944994	-0.0956479
Q13435	SF3B2	0					0.23359	-0.0246116	0.091687	0.100222	0.12849	0.00964549	0.048092	0.0620759
Q9BXK5	BCL2L13	1					0.224934	0.0627558	0.260906	0.182865	0.0730743	0.268439	0.190834	0.177449
Q6Q0C0	TRAF7	0					0.300536	0.302346	0.287489	0.29679	0.274305	0.217316	0.393368	0.294996
Q96BK5	PINX1	0					0.360938	-0.109028	0.0747038	0.108871	0.168204	-0.0168981	0.0587381	0.0700148
P61225	RAP2B	0					0.322338	0.151156	0.368181	0.280558	0.0837909	0.325538	-0.0236546	0.128558
O14744	PRMT5	0					-0.177342	0.0738712	-0.030269	-0.0445799	0.0284491	0.135442	-0.00159792	0.0540976
Q6ZSZ5	ARHGEF18	0					0.0337965	0.320006	-0.00284344	0.116986	0.164833	0.19721	0.0845014	0.148848
Q04726	TLE3	0					-0.108237	-0.172006	-0.115529	-0.131924	-0.195994	-0.151432	-0.118262	-0.155229
Q96A72	MAGOHB	0					0.00152434	0.0205731	-0.0342595	-0.00405402	0.0259163	0.0375444	-0.000666157	0.0209315
Q8TF64	GIPC3	0					-0.688335	-0.898584	-1.46511	-1.01734	-0.172937	-0.744026	-0.358241	-0.425068
Q9UHD1	CHORDC1	0					-0.174749	0.253519	0.0351105	0.0379605	0.0707882	0.164659	0.0536127	0.0963535
Q6NUQ4	TMEM214	2	+				0.307714	0.152736	0.288096	0.249515	0.255267	0.289638	0.300947	0.281951
P23434	AC092718.8	0					0.113086	-0.108669	0.0500861	0.0181679	-0.0524747	-0.108785	0.0489188	-0.0374469
Q9Y266	NUDC	0					-0.121119	0.172795	-0.0529083	-0.000410887	0.162861	0.16405	0	0.10897
Q6RW13	AGTRAP	3	+				0.453963	0.23277	0.294243	0.326992	0.11508	0.334891	0.186082	0.212018
Q8NE62	CHDH	0					-0.259729	-0.380926	0.198957	-0.147233	-0.109841	-0.290291	-0.190562	-0.196898
Q8TB96	ITFG1	1	+				0.0395674	0.0122042	0.338067	0.129946	0.183413	0.20201	0.165852	0.183758
P17152	TMEM11	2					0.287216	0.173305	0.676622	0.379048	0.204023	0.257223	0.581044	0.34743
Q8NDZ4	C3orf58	0	+				0.203452	0.663127	0.0317061	0.299428	-0.190559	-0.0913667	-0.00624866	-0.0960582
Q5ZPR3	CD276	1	+				0.138406	-0.0310792	0.156543	0.0879565	0.027182	0.00852386	0.227912	0.0878727
Q9Y3D9	MRPS23	0					0.0241106	-0.0699029	-0.00771224	-0.0178349	-0.0884736	-0.110722	-0.0294102	-0.0762018
Q9Y6M1	IGF2BP2	0					0.186813	0.207575	0.323618	0.239335	0.0961368	0.19924	0.1316	0.142326
Q13509	AC092143.1	0					-0.0988557	0.324354	-0.0832964	0.0474007	0.0258107	0.0444246	-0.0776799	-0.00248152
Q9Y285	FARSA	0					-0.153725	-0.105067	-0.143211	-0.134001	-0.139103	-0.137947	-0.129024	-0.135358
O14497	ARID1A	0					0.021253	-0.071011	0.0813823	0.0105414	-0.045768	-0.100882	0.0594323	-0.0290725
Q15642	TRIP10	0					-0.113556	0.233621	0.048507	0.0561909	0.0907225	0.175743	0.141119	0.135861
Q9H1X3	DNAJC25	3	+				-0.156777	-0.00580611	0.495441	0.110952	0.145802	-0.165786	0.145032	0.041683
Q9Y2Z4	YARS2	0					0.152277	0.0782323	0.168363	0.132957	0.113847	0.0693372	0.158338	0.113841
Q9HC35	EML4	0					-0.384207	-0.164413	-0.324994	-0.291205	-0.171742	-0.107104	-0.283584	-0.187477
O43896	KIF1C	0					-0.270846	0.0483791	-0.0857542	-0.102741	-0.12274	-0.0537405	-0.23063	-0.135704
P27797	CALR	0	+				0.0587275	-0.039406	0.110612	0.0433111	0.0344826	0.0827901	0.143089	0.0867873
Q8WV44	TRIM41	0					-0.0184008	-0.187302	0.213694	0.00266372	0.0669861	0.0635162	-0.178368	-0.0159553
Q8N9T8	KRI1	0					0.417814	0.115563	0.203135	0.245504	0.256133	0.00852386	0.11174	0.125466
A5YKK6	CNOT1	0	+				-0.187052	-0.044304	-0.0761414	-0.102499	-0.136279	-0.0376782	-0.121695	-0.0985508
Q9Y2G3	ATP11B	10	+				-0.216201	-0.520405	-0.316758	-0.351121	-0.641758	-0.372766	-0.341829	-0.452118
P37837	TALDO1	0					-0.245069	0.236375	-0.0336566	-0.0141167	0.0900609	0.23659	0.0379341	0.121528
P10176	COX8A	1					0.1312	-0.0726101	0.0391922	0.032594	-0.0276955	-0.0593673	-0.0210308	-0.0360312
Q9UJY5	GGA1	0					-0.0220991	1.11112	0.409601	0.499539	-0.107056	0.183048	-0.0815885	-0.00186539
Q9BTY7	HGH1	0					-0.29808	-0.0196462	-0.308751	-0.208826	-0.119503	-0.0628395	-0.344245	-0.175529
P54725	RAD23A	0					-0.141558	0.12188	-0.112392	-0.044023	-0.0367096	-0.0413384	-0.15187	-0.0766393
Q9Y3A4	RRP7A	0					0.121987	-0.0796007	-0.0386565	0.00124327	0.024546	-0.122416	-0.0211621	-0.0396773
P12268	IMPDH2	0					-0.237334	0.0195244	-0.18177	-0.133193	-0.0533733	0.015971	-0.188926	-0.0754429
O75410	TACC1	0					0.186947	0.0283314	0.0657032	0.0936605	0.563309	-0.31626	-0.0318884	0.0717202
Q96HC4	PDLIM5	0	+				0.189083	0.489689	0.318456	0.332409	0.409318	0.490611	0.326666	0.408865
Q68DI1	ZNF776	0					0.137761	0.138292	-0.577496	-0.100481	0.108589	-0.0102731	-0.839653	-0.247112
Q8IXI1	RHOT2	1					0.146038	-0.0281661	0.0351632	0.0510116	-0.0366088	-0.0632395	-0.0533617	-0.05107
O94875	SORBS2	0					-0.0174748	-0.240252	-0.216199	-0.157975	-0.199155	-0.0991919	-0.238331	-0.178893
Q9BVC3	DSCC1	0					0.71041	0.0415769	0.201793	0.317927	0.0561776	0.266008	0.216736	0.179641
O60427	FADS1	4	+				-0.0614934	-0.253327	-0.167826	-0.160882	-0.050376	-0.00236644	0.0379341	-0.00493611
Q15050	RRS1	0					0.230561	-0.0717492	0.1299	0.0962375	0.120812	0.00362702	0.0502977	0.0582457
P49411	TUFM	0					0.0562881	-0.0588988	0.0438685	0.0137526	-0.0613357	-0.0613714	-0.0219497	-0.0482189
Q9H773	DCTPP1	0					-0.343034	0.0186074	-0.229335	-0.184587	-0.210656	-0.198086	-0.347809	-0.252184
Q07864	POLE	0					-0.0595827	-0.223519	-0.211335	-0.164812	-0.250988	-0.242807	-0.0671627	-0.186986
Q9BUL5	PHF23	0					0.11982	0.0764591	0.101551	0.0992766	0.340167	0.077047	0.0823836	0.166533
Q49A26	GLYR1	0					0.109162	-0.102541	0.0474966	0.0180393	0.127924	-0.106457	0.029478	0.0169817
Q14202	ZMYM3	0					-0.330226	-0.470426	-0.560971	-0.453874	-0.369321	-0.4029	-0.568526	-0.446915
Q5VZL5	ZMYM4	0					-0.0473852	-0.205916	-0.0763366	-0.109879	-0.17624	-0.232053	-0.0979894	-0.168761
Q9Y4F1	FARP1	0					-0.614315	-0.479542	-0.564454	-0.55277	-0.591644	-0.193707	-0.249918	-0.34509
O15382	BCAT2	0					0.231662	-0.0567874	0.0256894	0.0668546	-0.0228107	-0.0299207	0.075488	0.00758553
Q9NQT5	EXOSC3	0					0.16431	-0.0908128	0.0561344	0.0432105	0.0612476	-0.0542774	-0.115559	-0.0361963
Q8TAE8	GADD45GIP1	0					0.0134237	-0.0707648	0.0250787	-0.0107541	-0.114058	-0.110076	-0.055543	-0.0932259
Q7Z5J4	RAI1	0					0.0993346	-0.175903	-0.213008	-0.0965253	0.0367117	-0.166655	0.0293422	-0.0335337
Q9BU61	NDUFAF3	0					0.195243	-0.00902172	0.1281	0.104774	0.0331042	0.0301276	0.1511	0.071444
Q96BD5	PHF21A	0					0.0782694	0.118087	0.206296	0.134218	0.16553	-0.0617719	0.0529214	0.0522265
Q8IZ73	RPUSD2	0					-0.190754	-0.0521812	-0.319096	-0.187344	-0.299761	-0.197357	-0.273257	-0.256792
Q96R06	SPAG5	0					-0.206889	-0.175101	-0.0988141	-0.160268	-0.164367	-0.228609	-0.241377	-0.211451
Q14554	PDIA5	0	+				0.346307	0.0356014	0.280953	0.220954	0.21829	0.188436	0.309425	0.238717
Q14683	SMC1A	0					0.0547048	-0.100733	0.00999635	-0.0120107	-0.0783077	-0.0597683	0.00681126	-0.0437549
Q9UL63	MKLN1	0					-0.0666506	0.0264866	0.0857246	0.0151869	-0.152769	0.0411239	-0.0303237	-0.047323
Q8N584	TTC39C	0					-0.438925	-0.109628	-0.395905	-0.314819	-0.373484	-0.325852	-0.315733	-0.338356
Q8N4Q0	ZADH2	0					0.171816	-0.00593493	0.0695486	0.0784766	-0.0235241	0.0636763	0.139459	0.0598705
Q9C0C9	UBE2O	0					-0.27618	0.130488	-0.0377546	-0.0611489	0.0384127	0.0404073	-0.0541319	0.00822934
O75718	CRTAP	0	+				0.0743151	-0.0481854	0.104165	0.0434316	0.116315	0.085138	0.235327	0.145593
O60244	MED14	0					0.0107053	-0.012999	0.120662	0.039456	0.108701	-0.134016	-0.0688151	-0.0313768
Q96MW1	CCDC43	0					0.021253	0.206187	0.0261083	0.0845162	0.210001	0.075769	-0.133889	0.0506267
Q15149	PLEC	0					0.116386	-0.046559	0.102986	0.0576043	0.0369243	0.0137188	0.117886	0.0561765
Q7Z7H8	MRPL10	0					0.142282	-0.0546728	-0.0656616	0.00731574	0.0194984	-0.0417445	0.0746457	0.0174665
Q567U6	CCDC93	0					0.0118867	0.0414438	0.0670138	0.0401147	0.0716586	0.205251	0.0778766	0.118262
P11021	HSPA5	0	+				0.215921	0.122302	0.27856	0.205594	0.18212	0.227622	0.297717	0.235819
Q8TBK6	ZCCHC10	0					0.0191136	0.0834284	0.156466	0.086336	0.116202	0.0517277	0.266113	0.144681
Q15942	ZYX	0					0.146297	0.396752	0.303312	0.282121	0.341479	0.443942	0.312416	0.365946
P49750	YLPM1	0					0.259593	-0.0685474	0.160734	0.11726	0.0485526	0.0135783	0.0633251	0.0418186
Q99747	NAPG	0					-0.0513493	0.109274	-0.0565894	0.000445177	0.0470538	0.0606654	0.11819	0.0753031
Q8NCF5	NFATC2IP	0					-0.193626	0.0574992	-0.140087	-0.0920715	-0.0685633	-0.0223956	-0.125487	-0.0721484
P30153	PPP2R1A	0					-0.142513	0.159016	-0.0296141	-0.00437056	0.0284491	0.10213	0.00667723	0.0457523
Q02040	AKAP17A	0					0.259733	-0.0401607	0.187274	0.135615	0.232091	0.154715	0.148691	0.178499
Q86V21	AACS	0					0.106131	0.431638	0.230112	0.25596	0.262082	0.292417	0.259862	0.271453
Q9Y678	COPG1	0					0.02578	0.219974	0.140502	0.128752	0.22203	0.275893	0.252018	0.24998
Q15021	NCAPD2	0					-0.186332	-0.0149198	-0.159069	-0.120107	-0.116449	-0.0367277	-0.154984	-0.10272
P55084	HADHB	0					0.0412549	-0.0859487	0.0253927	-0.00643369	0.0232824	-0.0237667	0.0805511	0.026689
P50579	METAP2	0					0.0869574	0.0288588	-0.0523627	0.0211512	0.172867	0.0676571	-0.000399657	0.0800415
Q66K74	MAP1S	0					-0.0108593	-0.0204113	-0.0541143	-0.0284616	0.079079	0.0836019	0.0262181	0.0629663
Q92572	AP3S1	0					0.0303213	0.302011	0.0749566	0.135763	0.267183	0.396607	0.237007	0.300266
Q9C0J8	WDR33	0					0.182417	-0.00438905	0.0728992	0.0836425	0.0939245	-0.0827097	0.0540276	0.0217475
Q9NZL9	MAT2B	0					-0.37971	0.0595187	-0.135084	-0.151758	-0.224374	-0.0185494	-0.198131	-0.147018
P35555	FBN1	0	+				0.622868	0.388351	0.126509	0.379243	0.338333	0.340472	0.494631	0.391145
Q9BSY4	CHCHD5	0					0.117911	0.0405128	0.00701272	0.0551456	-0.250814	0.156733	-0.163218	-0.0857663
Q9NRC1	ST7	3	+				0.129147	-0.000258513	0.0468767	0.0585886	0.134503	0.0465815	0.0818197	0.0876348
O75150	RNF40	0					-0.0576696	-0.0971116	-0.0134483	-0.0560765	-0.133355	-0.0560206	-0.0300628	-0.0731461
P86791	CCZ1	0					0.0155547	0.0260916	0.0964819	0.0460428	0.142141	-0.0534721	0.1257	0.0714563
Q8TBB5	KLHDC4	0					0.155667	0.138862	-0.109772	0.0615856	-0.066389	0.00628327	0.0271681	-0.0109792
P52272	HNRNPM	0					0.0493582	-0.0591471	0.0637127	0.0179746	-0.0552684	-0.0435029	0.0100274	-0.0295813
P49959	MRE11	0					0.222197	0.000129153	0.108078	0.110135	0.132004	0.0114702	0.13325	0.0922415
Q8WUK0	PTPMT1	0					0.169573	-0.14607	0.0218545	0.0151194	-0.0287113	-0.209337	-0.0301933	-0.0894137
Q96JJ3	ELMO2	0					-0.268124	0.01756	-0.01674	-0.0891014	0.129057	0.179241	0.237164	0.18182
O95625	ZBTB11	0					0.127354	-0.129146	-0.0134652	-0.00508585	-0.00403338	-0.0879626	-0.0700849	-0.054027
Q9BTZ2	DHRS4	0					0.15632	0.00686843	0.123722	0.0956369	0.103684	0.0865132	0.25967	0.149956
Q8IYB3	SRRM1	0					0.334199	-0.0653383	0.077433	0.115431	0.101794	0.0258661	-0.00863464	0.0396751
O43772	SLC25A20	6	+				0.146297	0.0256967	0.321003	0.164332	0.0698097	-0.0495735	0.130914	0.0503834
Q99958	FOXC2	0					0.142152	0.104401	0.078537	0.108364	0.00643566	-0.0210231	-0.0446041	-0.0197305
Q14240	EIF4A2	0					0.0268542	0.370993	0.371992	0.256613	0.0341646	0.371715	0.245717	0.217199
Q69YN2	CWF19L1	0					-0.26061	-0.155735	-0.189789	-0.202045	-0.282834	-0.130966	-0.243404	-0.219068
Q9BTK6	PAGR1	0					-0.0916142	0.274759	0.00205905	0.0617346	0.100239	-0.334496	0.134054	-0.033401
Q86W42	THOC6	0					0.006814	-0.0847301	0.051187	-0.0089097	-0.00175942	-0.0382211	0.0133855	-0.00886499
Q96JC1	VPS39	0					0.00340296	0.0650533	-0.030504	0.0126508	-0.166676	-0.251611	-0.0474432	-0.155243
Q9Y6A5	TACC3	0					-0.0988557	-0.0804568	-0.0119526	-0.063755	-0.145578	-0.0327837	-0.174832	-0.117731
Q7LBC6	KDM3B	0					-0.0776879	-0.0717492	-0.0105746	-0.0533372	-0.0984719	-0.0384924	-0.0609176	-0.0659606
A6NHR9	SMCHD1	0					0.101094	-0.08009	0.0597577	0.0269205	-0.0690571	-0.0930658	0.00159958	-0.0535078
Q9NP84	TNFRSF12A	1	+			+	0.837305	0.897748	1.17309	0.969382	1.05855	0.981533	0.899747	0.979943
Q71SY5	MED25	0					-0.101043	-0.258091	-0.0280005	-0.129045	0.0334222	-0.070953	-0.122063	-0.0531978
P52298	NCBP2	0					-0.000820246	-0.167409	0.0118278	-0.0521337	-0.0766391	-0.0574942	-0.0369622	-0.0570318
Q5TFE4	NT5DC1	0					-0.286787	0.036264	-0.245869	-0.165464	0.0274987	0.04615	-0.227105	-0.0511522
Q49AR2	C5orf22	0					-0.134207	0.220336	-0.714624	-0.209498	-0.0667845	-0.028692	-0.268509	-0.121329
Q03252	LMNB2	0					0.119438	-0.074944	0.0603298	0.0349414	-0.0874018	-0.0955455	0.0213418	-0.0538685
P40926	MDH2	0					0.0774035	-0.064844	0.0284148	0.0136581	-0.00589124	-0.0407966	0.0644392	0.00591711
Q15154	PCM1	0					0.116894	0.122584	0.28162	0.173699	0.11609	0.0342593	0.181345	0.110565
O15144	ARPC2	0					0.021015	0.166658	0.0522357	0.0799695	0.118112	0.178642	0.0615164	0.119423
Q969X6	UTP4	0					0.0786408	-0.0872879	0.0144752	0.00194268	-0.0260692	-0.0877005	-0.0435702	-0.0524466
Q92526	CCT6B	0					-0.319089	-0.105187	-0.242685	-0.22232	-0.242784	-0.171364	-0.263967	-0.226038
P19404	NDUFV2	0					0.0327172	-0.270363	-0.0924277	-0.110025	-0.204917	-0.14565	-0.144897	-0.165155
Q0ZGT2	NEXN	0					0.395534	0.159882	0.178787	0.244734	0.641011	0.369193	0.452652	0.487619
O00423	EML1	0					0.272418	0.0676252	-0.00157657	0.112822	0.455153	0.469507	0.646131	0.523597
Q86TU7	SETD3	0					0.00540165	0.0320277	-0.0530239	-0.00519816	-0.106286	0.00698311	-0.0132626	-0.0375219
Q9UH17	APOBEC3B	0					-0.0430688	-0.336669	-0.312898	-0.230879	-0.485057	-0.576345	-0.578285	-0.546562
Q7Z6J9	TSEN54	0					-0.418462	-0.304996	-0.347943	-0.357134	-0.205366	-0.0661702	-0.14983	-0.140455
Q9UBK9	UXT	0					0.071726	0.0348063	0.0381001	0.0482108	0.0180295	0.124754	-0.0634698	0.0264377
P07237	P4HB	0	+				0.242714	0.131337	0.283038	0.21903	0.263698	0.301626	0.361453	0.308926
O43592	XPOT	0					-0.227457	0.150869	-0.0751164	-0.0505683	0.188479	0.277209	0.062629	0.176106
Q6P9B9	INTS5	3					-0.0168957	0.178826	-0.0388901	0.0410135	-0.114537	-0.0710857	0.156704	-0.00963961
P08240	SRPRA	0					0.124924	0.031367	0.159336	0.105209	0.0325746	0.10826	0.109007	0.0832806
Q2M389	WASHC4	0					-0.021522	0.0196554	-0.035431	-0.0124325	0.0799544	0.146133	0.0357472	0.0872781
Q96IZ0	PAWR	0					0.170496	0.157775	0.116418	0.14823	0.199378	0.109101	0.0349279	0.114469
Q69YH5	CDCA2	0					0.0690187	-0.223519	-0.160941	-0.105147	-0.181364	-0.219304	-0.240588	-0.213752
P50748	KNTC1	0					-0.128	0.118789	-0.0644159	-0.0245424	-0.0410447	0.0415539	0.0189099	0.00647303
Q9P0W2	HMG20B	0					-0.148236	-0.432131	-0.217999	-0.266122	-0.235676	-0.0854699	-0.225169	-0.182105
Q5VWN6	FAM208B	0					0.0160287	-0.0813124	0.160792	0.0318359	-0.0678719	-0.23312	-0.0928763	-0.131289
Q9UK53	ING1	0					0.528774	0.0588453	0.062047	0.216556	-0.0370125	-0.006256	0.0500218	0.00225111
P52943	CRIP2	0					-0.125316	0.230053	0.0494117	0.051383	0.120812	0.220251	0.125904	0.155656
Q86SX6	GLRX5	0					0.141506	-0.0580299	-0.0852857	-0.000603247	0.0278154	-0.175934	0.0397134	-0.0361351
P85037	FOXK1	0					-0.214586	-0.0822898	-0.212727	-0.169867	-0.0478736	-0.0852072	-0.103332	-0.0788044
O94992	HEXIM1	0					-0.00386265	-0.130446	-0.106447	-0.080252	-0.0437599	-0.047418	-0.0799506	-0.0570428
P98175	RBM10	0					0.136859	-0.0279124	0.147075	0.0853406	0.0608153	-0.0229442	0.115171	0.0510139
Q9BVI4	NOC4L	3					0.136344	-0.0284196	0.0927837	0.0669026	-0.0391308	-0.0608373	-0.0573367	-0.0524349
Q9Y5B6	PAXBP1	0					0.122625	0.10788	0.0710068	0.100504	0.00976832	0.0189325	0.113037	0.0472458
O00165	HAX1	0					0.0198262	-0.197711	0.00231664	-0.0585226	-0.0385257	-0.026505	-0.0164277	-0.0271528
Q96PQ0	SORCS2	1	+				-0.369041	-0.198387	-0.313726	-0.293718	-0.217086	-0.503524	-0.28216	-0.334257
O95466	FMNL1	0	+				0.0207772	0.0279357	0.0727909	0.0405013	-0.0162715	-0.169383	-0.037092	-0.0742488
P08047	SP1	0					-0.150138	-0.229596	0.140672	-0.0796874	-0.0402391	-0.122544	-0.008767	-0.0571833
P24390	KDELR1	7	+				0.349603	0.123569	0.35194	0.275037	0.348583	0.441556	0.403572	0.397904
P53814	SMTN	0					-0.0315331	-0.27379	-0.497411	-0.267578	-0.271039	-0.135919	-0.225739	-0.210899
Q8TAA5	GRPEL2	0					0.209809	0.07755	0.304349	0.197236	0.157884	0.423636	0.333533	0.305018
Q92522	H1FX	0					0.094321	-0.181272	-0.0782868	-0.0550792	0.0836812	-0.0300572	0.0154042	0.0230094
Q9Y295	DRG1	0					-0.0629528	-0.0147918	0.00128654	-0.025486	-0.0678719	-0.0285554	0.0324729	-0.0213181
Q86YQ8	CPNE8	0					-0.0507838	-0.147471	-0.127742	-0.108666	-0.307899	-0.324406	-0.174832	-0.269046
Q9Y570	PPME1	0					-0.0511232	0.358921	0.0694227	0.12574	0.141455	0.275909	0.136967	0.184777
O95456	PSMG1	0					0.168124	0.109692	-0.0769706	0.0669486	0.16495	0.230463	-0.0963701	0.0996809
Q9UHD2	TBK1	0					0.19887	-0.0655854	0.0200453	0.0511101	0.117438	0.115094	-0.0694501	0.0543607
Q9H9A5	CNOT10	0					-0.167253	-0.0908128	-0.109248	-0.122438	-0.100502	-0.173095	-0.153787	-0.142461
P16401	HIST1H1B	0					0.351053	-0.0312057	0.0653624	0.128403	0.151428	-0.00153172	0.0410836	0.06366
Q8N531	FBXL6	0					0.112706	-0.203561	-0.157963	-0.0829391	-0.0576586	-0.188459	-0.0742671	-0.106795
Q9H2U1	DHX36	0	+				-0.158878	-0.159559	-0.156518	-0.158318	-0.14286	-0.146405	-0.105687	-0.131651
Q7L4I2	RSRC2	0					0.0513002	-0.0895983	0.137953	0.0332182	0.0120642	0.0356866	0.0463022	0.031351
Q5VST6	ABHD17B	0					0.0832276	0.16033	0.417457	0.220338	-0.088279	0.00195189	-0.0529766	-0.0464346
P55854	SUMO3	0					-0.0806835	-0.331232	-0.236746	-0.21622	0.0932614	0.0352584	-0.0764168	0.0173676
Q9H7E9	C8orf33	0					0.0850913	0.0443738	-0.156118	-0.00888416	-0.150625	-0.125995	-0.0304541	-0.102358
Q6GMV3	PTRHD1	0					-0.045115	0.247107	0.114115	0.105369	0.135413	0.269598	0.132184	0.179065
Q8TB03	CXorf38	0					0.114227	0.979028	0.119059	0.404105	0.701552	0.0752697	0.223145	0.333323
Q9UI09	NDUFA12	0					-0.0625039	-0.130092	-0.201572	-0.131389	-0.211909	-0.166407	-0.397612	-0.258642
A6NDG6	PGP	0					-0.330785	0.105792	-0.253728	-0.159574	0.00383716	0.0713998	-0.109891	-0.0115514
Q9BVK6	TMED9	1	+				0.192695	0.150151	0.249406	0.197418	0.170883	0.227981	0.261777	0.220214
Q71UM5	RPS27L	0	+				0.404985	0.315655	0.343996	0.354879	0.405335	0.487931	0.412482	0.435249
O14964	HGS	0					0.0046959	0.162514	0.0246948	0.0639681	0.134844	0.172285	0.114334	0.140488
O95263	PDE8B	0					-0.687971	-0.22374	0.200177	-0.237178	-0.218333	-0.183192	-0.34372	-0.248415
Q6WKZ4	RAB11FIP1	0					-0.0846679	-0.328043	-0.136551	-0.183087	-0.12255	-0.285956	-0.323739	-0.244082
Q53S33	BOLA3	0					-0.132284	-0.0716263	-0.478584	-0.227498	-0.167875	-0.0560206	-0.138496	-0.120797
Q4ZIN3	TMEM259	4	+				-0.0024593	-0.150037	-0.128778	-0.0937579	-0.459375	-0.319948	-0.176483	-0.318602
Q8TAT6	NPLOC4	0					-0.029123	0.115844	0.124171	0.0702971	0.109595	0.156515	0.148853	0.138321
Q9Y446	PKP3	0					-0.210945	-0.213741	-0.199289	-0.207992	-0.304297	-0.339129	-0.261857	-0.301761
Q01844	EWSR1	0					0.178831	-0.135751	0.0458851	0.0296549	0.00633156	-0.0341448	0.0857734	0.0193201
Q6IQ22	RAB12	0					0.059216	0.00310627	0.0968305	0.0530509	0.0911637	-0.0159339	0.125642	0.0669573
Q5THK1	PRR14L	0					0.171288	-0.348089	0.20272	0.00863963	0.182707	0.477593	0.523547	0.394616
Q6P161	MRPL54	0					0.387937	0.141711	0.148291	0.22598	0.0165621	-0.0708204	0.0289343	-0.00844134
O60678	PRMT3	0					-0.214889	0.114303	-0.0360667	-0.0455506	0.0177149	0.0701853	-0.159048	-0.0237158
P26641	EEF1G	0					-0.0708972	0.104818	-0.0287906	0.00171018	0.0367117	0.0843106	-0.0300628	0.0303199
Q5VZK9	CARMIL1	0					-0.18664	-0.000904654	-0.0855118	-0.0910189	-0.0122721	-0.0633729	0.00373544	-0.0239699
Q6NW29	RWDD4	0					0.111186	-0.0846082	-0.168696	-0.0473726	-0.0126827	-0.0514569	0.00600807	-0.0193772
Q9NPE3	NOP10	0					0.122625	0.0787785	0.253468	0.151624	0.0501602	-0.0479571	-0.0108844	-0.00289377
Q6UXH1	CRELD2	0	+				0.0538528	-0.158054	-0.0255095	-0.0432369	-0.0258656	-0.103089	-0.0751526	-0.0680356
Q9Y487	ATP6V0A2	8	+				-0.143893	-0.184347	0.022464	-0.101925	-0.42098	-0.315813	-0.17931	-0.305368
Q9NUL7	DDX28	0					0.106762	-0.179675	-0.0467298	-0.0398809	-0.015452	-0.209577	-0.0011987	-0.0754094
Q9H0L4	CSTF2T	0					0.0457242	-0.0277857	0.112353	0.0434304	0.307117	0.0919526	0.136732	0.1786
Q12873	CHD3	0					0.140084	-0.113935	0.10041	0.0421866	0.133708	0.0662705	-0.0103553	0.0632076
Q00577	PURA	0					0.0263767	0.0603273	-0.000719927	0.0286614	0.126341	0.211836	0.0894544	0.142544
Q86WQ0	NR2C2AP	0					-0.123918	0.330259	-0.169229	0.0123703	-0.150065	0.485452	-0.224941	0.0368155
Q9UDW1	UQCR10	0					0.123008	-0.0671905	0.100686	0.0521678	-0.0392316	0.139794	0.0290701	0.043211
Q3ZAQ7	VMA21	2	+				-0.18396	0.0718315	-0.143941	-0.0853566	-0.286066	-0.118186	-0.0779323	-0.160728
P13056	NR2C1	0					-0.0338247	-0.158054	-0.551175	-0.247685	-0.288782	-0.379101	-0.0883717	-0.252085
P11279	LAMP1	1	+				-0.101589	-0.0887475	0.0086849	-0.0605506	-0.0931416	0.109312	0.0587381	0.0249694
Q9NQ50	MRPL40	0					0.259452	-0.0803346	0.114189	0.0977689	0.00633156	-0.115488	-0.00744219	-0.0388662
Q9NYM9	BET1L	1	+				0.529214	0.404176	-0.283757	0.216544	0.463983	0.157556	-0.531764	0.0299248
Q15907	RAB11B	0					0.0223238	0.020442	0.113224	0.0519967	-0.0400376	0.00614336	0.0328818	-0.000337475
O94903	PLPBP	0					-0.0785761	0.254691	0.197029	0.124381	0.0656848	0.166378	-0.043958	0.0627017
Q9H334	FOXP1	0					0.00375551	-0.15898	0.152763	-0.000820531	-0.418193	0.239975	0.151663	-0.00885177
Q9Y3B3	TMED7-TICAM2	1	+				0.188549	0.168575	0.199586	0.18557	0.219978	0.208274	0.320347	0.249533
Q9BV57	ADI1	0					-0.0735727	0.383553	0.0555997	0.12186	0.164485	0.274375	0.166405	0.201755
Q7Z7N9	TMEM179B	4	+				-0.403387	-0.379635	-0.360685	-0.381236	-0.192282	-0.393597	-0.203463	-0.263114
Q15361	TTF1	0					0.201833	-0.130092	0.0536942	0.0418119	0.158	0.0761509	-0.0328004	0.0671167
Q86WX3	RPS19BP1	0					0.0101151	-0.019136	-0.0249366	-0.0113192	0.221426	-0.102699	0.0572126	0.0586465
	PARVA		+				0.0576292	0.294364	0.0603298	0.137441	0.239653	0.215325	0.10585	0.186943
Q6PCB5	RSBN1L	0					0.151365	-0.166257	-0.0203286	-0.0117402	0.079079	0.0375444	0.0191799	0.0452678
Q8N5I4	DHRSX	0	+				0.0370398	-0.0380216	0.209207	0.0694086	-0.121408	0.0745359	-0.0471854	-0.0313525
Q01082	SPTBN1	0					0.281364	0.258692	0.358805	0.29962	0.343449	0.286423	0.316658	0.31551
Q96MD7	C9orf85	0					0.104492	0.127236	-0.140943	0.0302618	0.0873076	-0.357406	-0.2082	-0.159433
O00629	KPNA4	0					0.0770326	0.0948428	0.0631931	0.0783562	0.0299287	0.10814	0.10456	0.0808761
Q6PI98	INO80C	0					-0.0858832	-0.0593952	-0.223032	-0.12277	0.0168765	0.00125458	0.0282548	0.0154619
Q9ULJ6	ZMIZ1	0					0.00669623	0.100515	-0.840415	-0.244401	-0.164737	-0.00125327	-0.033842	-0.0666108
Q14114	LRP8	1	+				0.148894	0.460932	0.524718	0.378181	0.269054	0.275758	0.530228	0.358346
Q8WXA9	SREK1	0					0.148634	-0.0767841	-0.00296321	0.0229622	0.0832422	-0.0462041	0.0317919	0.0229433
Q9BUI4	POLR3C	0					-0.049312	-0.180816	-0.145631	-0.125253	-0.222244	-0.156065	-0.180486	-0.186265
Q8NEN9	PDZD8	0	+				-0.0337103	-0.147471	-0.0909956	-0.0907257	-0.218778	-0.372874	-0.343825	-0.311826
Q2NKX8	ERCC6L	0					-0.403564	0.0533345	-0.0223897	-0.124207	-0.0970202	-0.0544116	-0.169274	-0.106902
P48739	PITPNB	0					-0.182928	0.279537	-0.131175	-0.0115221	0.113511	0.0911658	-0.0326703	0.0573355
Q96BS2	TESC	0					-0.248723	-0.0904486	0.0368331	-0.10078	0.126115	0.149637	-0.0330609	0.0808969
Q9NSY1	BMP2K	0					0.358712	-0.258308	-0.155702	-0.0184324	0.566818	-0.019237	0.223939	0.257173
P14618	PKM	0					-0.0436374	0.36078	0.134222	0.150455	0.283982	0.363392	0.268229	0.305201
Q68CP9	ARID2	0					0.0530013	-0.141857	0.03069	-0.0193887	-0.141452	-0.178645	-0.141278	-0.153792
Q96IR7	HPDL	0					0.19149	-0.0431753	0.0957307	0.0813485	0.0561776	-0.015796	0.0845014	0.0416277
Q6P4E1	CASC4	1					0.242298	0.174253	0.312226	0.242926	0.217688	0.203068	0.364177	0.261644
Q658Y4	FAM91A1	0					-0.132818	0.0188693	-0.100606	-0.0715185	0.00228041	-0.160311	-0.111988	-0.0900062
Q9UII2	ATPIF1	0					-0.0276289	-0.0658325	0.0924913	-0.000323363	-0.00661299	0.012313	0.161852	0.0558506
P36957	DLST	0					0.16326	0.0217538	0.156887	0.113967	0.0546709	0.0250153	0.169399	0.0830283
O75533	SF3B1	0					0.101597	-0.0372658	0.0764384	0.0469231	-0.0479738	-0.0589661	0.000932876	-0.0353357
Q86UN3	RTN4RL2	0	+				-0.369676	-0.535112	-0.387278	-0.430689	-0.541151	-0.602641	-0.448782	-0.530858
Q9Y2G5	POFUT2	0	+				0.124412	-0.0412918	0.146677	0.0765991	0.139971	-0.292455	0.338225	0.0619136
Q5VTB9	RNF220	0					0.237868	1.59023	0.1964	0.674834	0.124646	-0.468409	-0.067417	-0.13706
Q99653	CHP1	0					-0.0668744	-0.105428	-0.0364513	-0.0695845	-0.137127	-0.0625726	-0.0775537	-0.0924177
P61599	NAA20	0					-0.109868	0.027145	-0.0676424	-0.0501217	-0.124737	0.00824361	0.0341091	-0.0274613
Q2T9J0	TYSND1	0					0.160899	-0.0449308	0.230433	0.115467	-0.0277971	-0.0648388	0.154418	0.020594
Q01167	FOXK2	0					0.0959486	-0.0491854	0.177526	0.074763	-0.181821	-0.273216	0.13965	-0.105129
Q9Y305	ACOT9	0					0.33411	0.152448	0.359399	0.281986	0.153615	0.211513	0.298552	0.221227
Q86X02	CDR2L	0					-0.182722	0.190021	0.212899	0.0733995	0.201044	0.0615667	-0.0115454	0.0836883
Q9Y620	FSBP	0					0.000117115	-0.102179	-0.345786	-0.149283	-0.281557	-0.599793	-0.412003	-0.431118
Q8N1G0	ZNF687	0					0.104618	-0.0853395	0.142204	0.0538275	0.0442745	-0.0149689	0.0967023	0.0420026
Q6PKG0	LARP1	0					0.00799204	0.0233297	-0.0615106	-0.010063	0.00810099	0.0113296	0.00333467	0.00758843
Q3B7T1	EDRF1	0	+				-0.0859936	0.315945	0.0837607	0.104571	0.107696	0.347422	0.261889	0.239002
O43143	DHX15	0					0.105879	-0.00116307	0.0588822	0.0545326	0.0720942	-0.0322387	-0.0470565	-0.00240037
Q8N9R8	SCAI	1					0.40957	0.226192	-0.253297	0.127488	-0.253422	-0.0379497	-0.100725	-0.130699
O15061	SYNM	0					-0.0863249	-0.335542	-0.252002	-0.224623	-0.437211	-0.337035	-0.414704	-0.396317
P68363	TUBA1B	0					-0.167462	0.297126	-0.0925241	0.01238	-0.0198513	0.0352584	0.0258111	0.0137394
Q9H2G2	SLK	0					-0.246057	0.155901	-0.0508406	-0.0469989	0.0628693	0.090869	-0.00159792	0.0507135
Q9H981	ACTR8	0					0.122115	-0.0642259	-0.0148915	0.0143324	-0.0444631	-0.201603	-0.139706	-0.128591
Q5VW38	GPR107	7	+				0.198063	0.0608666	0.35402	0.204317	0.224085	0.247911	0.333147	0.268381
O96005	CLPTM1	5	+				0.181753	-0.0356271	0.160217	0.102114	0.0739461	0.0425581	0.13987	0.0854582
Q9UBV2	SEL1L	1	+				0.0676667	-0.001938	0.155969	0.0738994	0.118	0.100352	0.100554	0.106302
Q96EP5	DAZAP1	0					0.122497	-0.112859	0.0195587	0.00973215	-0.0672788	0.0090847	-0.0123382	-0.0235108
A0JLT2	MED19	0					0.241189	0.0894683	0.29521	0.208623	0.00716401	0.0941668	0.0958478	0.0657262
P13051	UNG	0					0.108404	0.290121	0.0526626	0.150396	0.178013	0.325084	-0.0159006	0.162399
Q6DKJ4	NXN	0					-0.208106	0.0882305	-0.123011	-0.0809623	-0.0874018	-0.0131753	-0.188576	-0.0963842
Q9BQ52	ELAC2	0					-0.213777	-0.0746985	-0.220517	-0.169664	-0.20994	-0.234542	-0.307681	-0.250721
Q15257	PTPA	0					-0.125746	0.127377	-0.145414	-0.0479275	0.0508037	0.0275691	-0.169392	-0.0303397
Q9HD15	SRA1	0					-0.241107	0.17179	-0.215993	-0.0951035	0.125437	0.300407	0.0620727	0.162639
[truncated: 3,949 more rows]
