# Supplementary material for: The ER membrane protein complex interacts cotranslationally to enable biogenesis of multipass membrane proteins
Source: eLife. 2018 May 29;7:e37018. doi: 10.7554/eLife.37018 (PMC5995541; doi:10.7554/eLife.37018)
Supplement: Supplementary file 2. — A list of all transmembrane domains annotated in the yeast proteome for analyses performed in Figure 3. See Materials and methods for details on TMD annotation. [file elife-37018-supp2.xlsx]

## Sheet: Yeast TMDs
Uniprot Accession	Gene Name	Locus	start	end	TMD amino acid sequence	Upstream	Downstream
P04710	AAC1	YMR056C	9	44	QSHFGVDFLMGGVSAAIAKTGAAPIERVKLLMQNQ	MSHTETQTQ	EEMLKQGSLD
P04710	AAC1	YMR056C	80	105	TANVLRYFPTQALNFAFKDKIKSLL	EGIVSFWRGN	SYDRERDGYA
P04710	AAC1	YMR056C	113	148	YAKWFAGNLFSGGAAGGLSLLFVYSLDYARTRLAA	LLSYDRERDG	DARGSKSTSQ
P04710	AAC1	YMR056C	182	210	GFVPSVLGIIVYRGLYFGLYDSFKPVLL	KTDGLLGLYR	TGALEGSFVA
P04710	AAC1	YMR056C	214	249	EGSFVASFLLGWVITMGASTASYPLDTVRRRMMMT	FKPVLLTGAL	SGQTIKYDGA
P04710	AAC1	YMR056C	277	303	GCGANIFRGVAAAGVISLYDQLQLIM	QKEGAYSLFK	FGKKFK
P18238	AAC3	YBR085W	8	43	ETNFAINFLMGGVSAAIAKTAASPIERVKILIQNQ	MSSDAKQQ	DEMIKQGTLD
P18238	AAC3	YBR085W	79	104	TANVIRYFPTQALNFAFKDKIKLMF	EGLISFWRGN	GFKKEEGYGK
P18238	AAC3	YBR085W	111	146	YGKWFAGNLASGGAAGALSLLFVYSLDFARTRLAA	LMFGFKKEEG	DAKSSKKGGA
P18238	AAC3	YBR085W	180	208	GFMPSVVGIVVYRGLYFGMFDSLKPLVL	KSDGIAGLYR	TGSLDGSFLA
P18238	AAC3	YBR085W	212	247	DGSFLASFLLGWVVTTGASTCSYPLDTVRRRMMMT	LKPLVLTGSL	SGQAVKYNGA
P18238	AAC3	YBR085W	275	301	GCGANILRSVAGAGVISMYDQLQMIL	ASEGVGSLFK	FGKKFK
	ADP1	YCR011C	6	25	YLYYSILSFLLLSCSVVLA	MGSHRR	KQDKTPFFEG
P25371	ADP1	YCR011C	324	345	LVLALTAVMVLALFTFATFYI	KDPTVSWQGK	SKSPLFRNGL
P25371	ADP1	YCR011C	463	481	IIGFVDQDDFLLPTLTVF	ISMDRKSFSK	ETVLNSALLR
P25371	ADP1	YCR011C	793	814	LLLGNYLLTILLSLFLGTLYY	SFKNMYRNPK	NVSNDISGFQ
P25371	ADP1	YCR011C	828	849	LFFFILTYFGFVTFTGLSSFA	DISGFQNRMG	LERIIFIKER
P25371	ADP1	YCR011C	877	898	VVPLRVVPPILLSLIVYPMTG	AYYISKIMSE	LNMKDNAFFK
P25371	ADP1	YCR011C	909	930	IGILILFNLGISLEILTIGII	NMKDNAFFKC	FEDLNNSIIL
P25371	ADP1	YCR011C	937	958	IILSVLVLLGSLLFSGLFINT	GIIFEDLNNS	KNITNVAFKY
P25371	ADP1	YCR011C	1000	1021	IEVPGATILSTFGFVVQNLVF	MLKERKYGLN	DIKILALFNV
P25371	ADP1	YCR011C	1024	1045	ILALFNVVFLIMGYLALKWIV	VVQNLVFDIK	VEQK
P25613	ADY2	YCR010C	89	110	PAPLGLSAFALTTFVLSMFNA	APAPVHKFAN	RAQGITVPNV
P25613	ADY2	YCR010C	120	141	VVGCAMFYGGLVQLIAGIWEI	RAQGITVPNV	ALENTFGGTA
P25613	ADY2	YCR010C	151	172	LCSYGGFWLSFAAIYIPWFGI	ALENTFGGTA	LEAYEDNESD
P25613	ADY2	YCR010C	185	206	ALGFYLLGWAIFTFGLTVCTM	YEDNESDLNN	KSTVMFFLLF
P25613	ADY2	YCR010C	208	229	TVMFFLLFFLLALTFLLLSIG	FGLTVCTMKS	HFANRLGVTR
P25613	ADY2	YCR010C	240	261	GGVLGVVVAFIAWYNAYAGVA	FANRLGVTRA	TKQNSYVLAR
P39925	AFG3	YER017C	115	136	FANTMFLTIGFTIIFTLLTPS	SLSEYFRSKE	SNNSGDDSNR
P39925	AFG3	YER017C	223	244	PFTFLFPFLPTIILLGGLYFI	IPIKYIERSS	TRKINSSPPN
Q12482	AGC1	YPR021C	533	554	FSLGSIAGCIGATVVYPIDFI	FYPIFDSLYN	KTRMQAQRSL
Q12482	AGC1	YPR021C	590	611	GPQLIGVAPEKAIKLTVNDFM	EGIKGLYSGL	RNRLTDKNGK
Q12482	AGC1	YPR021C	621	642	LSLFPEIISGASAGACQVIFT	RNRLTDKNGK	NPLEIVKIRL
Q12482	AGC1	YPR021C	680	702	GLYNGVAACLMRDVPFSAIYFP	TQIVKKLGLR	TYAHLKKDLF
Q12482	AGC1	YPR021C	730	751	LTAGAIAGMPAAFLTTPFDVI	KRNRLKTWEL	KTRLQIDPRK
Q12482	AGC1	YPR021C	785	806	FKGGGARVLRSSPQFGFTLAA	ILKEESFRSF	YELFKGFIPS
P25376	AGP1	YCL025C	124	145	VLMIALGTGIGTGLLVGNGTA	SLKKTIQPRH	LVHAGPAGLL
P25376	AGP1	YCL025C	148	169	AGPAGLLIGYAIMGSILYCII	LVGNGTALVH	QACGEMALVY
P25376	AGP1	YCL025C	197	218	FGFAVAWVYCLQWLCVCPLEL	AYPSFLVDDG	VTASMTIKYW
P25376	AGP1	YCL025C	231	252	VNPDVFVIIFYVLVITINIFG	SMTIKYWTTS	ARGYAEAEFF
P25376	AGP1	YCL025C	260	281	FFFNCCKILMMTGFFILGIII	FGARGYAEAE	DVGGAGNDGF
P25376	AGP1	YCL025C	313	334	GVAATLVTAAFAFGGSEFIAI	NGKHAIDRFK	TTAEQSNPRK
P25376	AGP1	YCL025C	352	373	MIYRILFLFLATIILLGFLVP	RKAIPGAAKQ	YNSDQLLGST
P25376	AGP1	YCL025C	402	425	VVPHFINAVILLSVLSMANSSFY	VIAVASHGVR	SSARLFLTLS
P25376	AGP1	YCL025C	452	473	PLIAMGVSALFAVIAFCAASP	VFSYIDRAGR	KEEQVFTWLL
P25376	AGP1	YCL025C	477	498	VFTWLLAISGLSQLFTWTAIC	FCAASPKEEQ	LSHLRFRRAM
P25376	AGP1	YCL025C	531	552	ACIMMILILIAQFWVAIAPIG	SQTGVWGSAY	EGKLDAQAFF
P25376	AGP1	YCL025C	560	581	FFENYLAMPILIALYVGYKVW	IGEGKLDAQA	HKDWKLFIRA
P38090	AGP2	YBR132C	94	115	LIAISGVIGTALFVAIGKALY	RRKLENRHVQ	RGGPASLLLA
P38090	AGP2	YBR132C	117	138	GPASLLLAFALWCVPILCITV	VAIGKALYRG	STAEMVCFFP
P38090	AGP2	YBR132C	165	186	AVMASWNFWFLECVQIPFEIV	LATKCVDDSL	SVNTIIHYWR
P38090	AGP2	YBR132C	199	220	SAGIPLAVQVVLYLLISICAV	TIIHYWRDDY	KYYGEMEFWL
P38090	AGP2	YBR132C	227	248	FWLASFKIILALGLFTFTFIT	CAVKYYGEME	MLGGNPEHDR
P38090	AGP2	YBR132C	288	309	FLACLIQASFTIAGGEYISML	VGKSSGYFQG	AGEVKRPRKV
P38090	AGP2	YBR132C	326	347	VFVRLTFLFLGSCLCVGIVCS	RKVLPKAFKQ	PNDPDLTAAI
P38090	AGP2	YBR132C	379	400	ILPDIVNIALITAAFSAGNAY	VIAMNNLKIR	TYCSSRTFYG
P38090	AGP2	YBR132C	427	448	GVPIYSVAISLVWALVSLLQL	PKIFTRCNRH	NSNSAVVLNW
P38090	AGP2	YBR132C	459	480	INLITASQLINFVVLCIVYLF	SNSAVVLNWL	FRRAYHVQQD
P38090	AGP2	YBR132C	505	526	AIIGLVSCSAMILIQGYTVFF	PFRSWGQPYT	PKLWNTQDFL
P38090	AGP2	YBR132C	534	555	FLFSYLMVFINIGIYVGYKFI	FFPKLWNTQD	WKRGKDHFKN
P43548	AGP3	YFL055W	57	78	ISLLALGGVIGPGCLVGAGNA	GVKRALKNRH	LNKGGPLALL
P43548	AGP3	YFL055W	81	102	GGPLALLLGFSIIGIIAFSVM	LVGAGNALNK	ESIGEMITLY
P43548	AGP3	YFL055W	126	147	SDALPAVCGYAYVVVFFAVLA	GFTTLARRFH	NEYNTLSSIL
P43548	AGP3	YFL055W	168	189	YILIFWFAFEIFQLVGVGLFG	FWGPQVPLYG	ETEYWLAWLK
P43548	AGP3	YFL055W	193	214	WLAWLKIVGLVAYYIFSIVYI	GVGLFGETEY	SGDIRNRPAF
P43548	AGP3	YFL055W	241	262	IAIVFVFCSTFYSGTESVALA	PGALSHGFKG	ATESKNPGKA
P43548	AGP3	YFL055W	280	301	LWRILVVYIGIAVFYGATVPF	KAVPLAVRQT	DDPNLSASTK
P43548	AGP3	YFL055W	324	345	GWAGGAHLVNAFILITCISAI	SPIAIAISRA	NGSLYIGSRT
P43548	AGP3	YFL055W	375	396	GVPIPAITVFNALGLISLMNV	PKILAWTDRR	SVGAANAYSY
P43548	AGP3	YFL055W	402	423	AYSYIVNLSGVGVFIVWGVIS	LMNVSVGAAN	YTHLRIRKAW
P43548	AGP3	YFL055W	446	467	ALFYPWTPVLSLAANIFLALI	GRSIEELPYE	QGWSYFVPFD
P43548	AGP3	YFL055W	480	501	FVDAYILLPVGILLYIGICVF	SYFVPFDAGN	KSNHFRTVDL
P52923	AIF1	YNR074C	6	25	NIVVVGAGVFGVSVANHLY	MTINTK	RELGGTYAIK
P87275	AIM11	YER093C-A	19	37	YGAAAFTLITMRLISRAI	KRRVLQMARF	KVRKYVPSIF
P87275	AIM11	YER093C-A	65	88	LTYASAASIGTFSTLIFGFCWAL	FSQRNEAMSA	DISTAREFVF
P53109	AIM14	YGL160W	20	41	IKYGYYVLIISLVYLIGLALL	KRHSETHFAN	RAFGRRTPSR
P53109	AIM14	YGL160W	69	90	AIHLGILFFAVLIPFYYHYSL	IIYRLYDIDP	TTQSTVYLKR
	AIM14	YGL160W	100	118	LGRLSYALIPLNLFLTLR	TTQSTVYLKR	PNWFLRKNCT
P53109	AIM14	YGL160W	141	162	IITVIGLLHGIFFIIKWAIDD	FIPFHKWFSR	NVSLKQKLIL
P53109	AIM14	YGL160W	176	197	FAGFIISILVLFLLICSIGPM	KQKLILKTFN	RRYNYRLFYI
	AIM14	YGL160W	203	222	LFYIVHNLVNVAFILLTPI	IGPMRRYNYR	HSRPGVKFPF
	AIM14	YGL160W	231	251	FLLLNCTLLFIHIINRIVFA	IHSRPGVKFP	KSLMILNKNA
P53109	AIM14	YGL160W	373	394	IAIICGGSGISFALPLFRHFF	PEECYSQGTN	NKENVKYLKM
P40502	AIM19	YIL087C	30	48	ALANAALLASTPVLSPSF	LYALTRTPYP	KVPPTQSPAL
P40502	AIM19	YIL087C	79	96	TALFFSTMQAIGAYMIY	STARIGITTK	DNDLENGAGF
P40502	AIM19	YIL087C	102	119	GAGFIATWSALYLIVGG	YMIYDNDLEN	KKSFSALRYG
P40502	AIM19	YIL087C	130	147	TWPLVLSSVSLANAVLY	KSFSALRYGR	GQRFLATGFQ
P40451	AIM20	YIL158W	5	26	VAVGTAVGIPIAVGVIIALIF	MGNVS	WCKLQRRYKK
P32858	AIM26	YKL037W	6	27	EHLLLSQLKGSFFLLLLAYFF	MQTMGG	RGRSPYYARC
P32858	AIM26	YKL037W	40	61	LAVTPGAITIAIAIATDSIPA	SPYYARCYRR	LAKSKVLVSV
P32858	AIM26	YKL037W	97	118	FLFCLGSARFCISFPCFGLSI	PRPFSNSLTR
Q04516	AIM33	YML087C	14	35	PFYPFCTGLLLNCVVTPLYFW	ETCISFVSTN	KTQNGRIVVV
Q04516	AIM33	YML087C	41	62	IVVVSLLQFVVLYATAFISIG	LYFWKTQNGR	TDKSLYRNKW
Q04516	AIM33	YML087C	179	200	LGIIAGGSGITPVLQVLQEII	LEYDQDTATE	PSPEDLTHIS
Q03673	AIM34	YMR003W	171	187	IFLLGFFMLSCLWWNL	VHSHLQPRDR	EPQESKPTID
Q03798	AIM36	YMR157C	63	82	IFLVAIIGTVIFVKTVQSL	DKIDAPGFKK	DKNKPKTTLS
Q08223	AIM39	YOL053W	155	176	QIWSAIFGGIFGVILGYSLIY	ITHQRNKRRK	RVIYLKEQSF
P39010	AKR1	YDR264C	321	341	AKLVTFITPFLFLGIAFALF	IKKWFKKSQH	SHINPLFVII
P39010	AKR1	YDR264C	346	364	LFVIIVLFLLAIATNKGL	AFALFSHINP	NKFVLPSYGR
P39010	AKR1	YDR264C	384	405	SPLLSGVFFGTLLWVTIVWFF	MGVHNVTLLR	KVMPRTFSDE
P39010	AKR1	YDR264C	418	439	NILMLVILVSVFYLFGQLVIM	PRTFSDEQYT	DPGCLPEETD
P39010	AKR1	YDR264C	513	534	AFIFFITLMESGIFTFLALCL	FNDVGLKNHK	EYFDELEDAH
P39010	AKR1	YDR264C	570	591	FVFLILLWALLQSIWVASLIF	DLCSGLIYDR	VQAFQICKGM
	AKR2	YOR034C	153	176	IMHFSVYSSNILLVVYVLYFVVN	PTLKDEQGLN	NNDNVDIDSK
Q12013	AKR2	YOR034C	306	327	FLLMVYIYLISLVLSPVLAIM	HAQFTIFLSP	LSLLVTVVMV
Q12013	AKR2	YOR034C	327	348	LSLLVTVVMVNTLKKFVLPCL	LVLSPVLAIM	PRKNTYKVSL
Q12013	AKR2	YOR034C	360	381	TPFFSGLFLSTFCFLIYIWTK	KNTYKVSLTR	KLYPYSVSDY
Q12013	AKR2	YOR034C	392	413	MKNVQFLVTSFLTVVLFLRLV	LYPYSVSDYT	RSDPGCLKTD
Q12013	AKR2	YOR034C	489	510	LFVFFAVTVQYHMFLFMWLCL	YNDVGLKNHK	AYFKKTNYIY
Q12013	AKR2	YOR034C	546	567	TFFLFIWISVNFIWLGAMLIV	LCKGSNYDPS	QFFQILKGIT
Q08548	ALE1	YOR175C	19	39	SFTLRYAICLLGSFPLNAIL	TKIITNYGID	KRIPEKRIGL
Q08548	ALE1	YOR175C	51	72	CFIISMSMFYLFGVLNLVSGF	IPEKRIGLKC	RTLFISTMFT
Q08548	ALE1	YOR175C	92	113	FMPHLNFMFVMGHLAINHIHA	YLISRFYRSK	QFLNEQTQTT
Q08548	ALE1	YOR175C	231	252	KLALWKVVQGLAWMILSTLGM	GERRQIPKNG	KHFPVKYVLD
Q08548	ALE1	YOR175C	274	295	IHYLFLLGFIHRFKYYAAWTI	GFPTRSFIFR	SEGSCILCGL
Q08548	ALE1	YOR175C	429	450	LVGIYAIKLAFGYMVQPFIIL	TPLPSKKIYD	DLKPSLMVWG
Q08548	ALE1	YOR175C	456	477	MVWGSVYFYVHIIVAFSFFLF	FIILDLKPSL	RGPYAKQVTE
P16661	ALG1	YBR110W	7	34	WLLALIILYLSIPLVVYYVIPYLFYGN	MFLEIPR	KSTKKRIIIF
P53954	ALG11	YNL048W	20	41	KYVVSSLVLVYGLIKVLTWIF	EEVKSHFGFK	RQWVYSSLNP
P53730	ALG12	YNR030W	2	23	WSVLDTVLLTVISFHLIQAPF	MR	TKVEESFNIQ
P53730	ALG12	YNR030W	61	82	FVGAVIIAMLSRPYLYLSSLI	LKFPGVVPRT	QTSRPTSIDV
P53730	ALG12	YNR030W	89	110	IDVQLVVRGIVGLTNGLSFIY	SLIQTSRPTS	LKNCLQDMFD
P53730	ALG12	YNR030W	136	157	IYDSAGTWFLLFLIGSFHLMF	KEENEDKDIY	YSTRTLPNFV
P53730	ALG12	YNR030W	178	199	WVLLGRYNAAIFLSALVAIVF	TLPLTNVALG	RLEVSALSAG
P53730	ALG12	YNR030W	202	223	VSALSAGIALFSVIFKKISLF	ALVAIVFRLE	DAIKFGIFGL
P53730	ALG12	YNR030W	227	248	FGIFGLGLGSAISITVDSYFW	KKISLFDAIK	QEWCLPEVDG
P53730	ALG12	YNR030W	275	296	VTAYFTHYLRMMFMPPTVLLL	GYASKWGVEP	NYFGYKLAPA
P53730	ALG12	YNR030W	303	324	APAKLKIVSLASLFHIIVLSF	LLLNYFGYKL	QPHKEWRFII
P53730	ALG12	YNR030W	331	352	FIIYAVPSIMLLGATGAAHLW	LSFQPHKEWR	ENMKVKKITN
P53730	ALG12	YNR030W	365	386	LAILPLSIMTSFFISMAFLYI	KVKKITNVLC	SRMNYPGGEA
P53730	ALG12	YNR030W	417	438	IPPCMTGVTLFGELNYGVYGI	NITNATVHIS	NYDKTENTTL
P38242	ALG14	YBR070C	7	28	SLVLIVSTAYVIRLIAILPFF	MKTAYLA	HTQAGTEKDT
P43636	ALG2	YGL065C	63	84	VYGDFLPTNFLGRFFIVFATI	EVKNGQLKVE	RQLYLVIQLI
P43636	ALG2	YGL065C	111	132	TCIPLLHIFSSATLMFYCHFP	YQLIIIDQLS	DQLLAQRAGL
P43636	ALG2	YGL065C	442	463	WEIFGISFSNFILHMAFIKIL	VIWKEKKYYP	PNNPWPFLFM
	ALG2	YGL065C	469	492	FLFMATFMVLYFKNYLWGIYWAF	IKILPNNPWP	VFALSYPYEE
P38179	ALG3	YBL082C	41	62	ANLIVMPLLILFESMLCKIII	GVRYVIFDCR	KKVAYTEIDY
P38179	ALG3	YBL082C	95	116	GTGPLVYPAGHVLIYKMMYWL	GMLDYSQVSG	TEGMDHVERG
P38179	ALG3	YBL082C	137	158	LALQMACYYLLHLPPWCVVLA	VFFRYLYLLT	CLSKRLHSIY
P38179	ALG3	YBL082C	171	192	LFNDCFTTLFMVVTVLGAIVA	KRLHSIYVLR	SRCHQRPKLK
P38179	ALG3	YBL082C	216	237	VSIKMNALLYFPAMMISLFIL	LVISATYSMA	NDANVILTLL
P38179	ALG3	YBL082C	242	263	ILTLLDLVAMIAWQVAVAVPF	SLFILNDANV	LRSFPQQYLH
P38179	ALG3	YBL082C	302	323	FHLALLISHLIALTTLFVTRY	MDEEAFNDKR	PRILPDLWSS
P38179	ALG3	YBL082C	345	366	ANPAKTIPFVLIASNFIGVLF	HPLRKNAVLN	SRSLHYQFLS
P38179	ALG3	YBL082C	381	402	LPILIFWSGMPFFVGPIWYVL	YQFLSWYHWT	HEWCWNSYPP
P38179	ALG3	YBL082C	415	436	ASTLLLALNTVLLLLLALTQL	CWNSYPPNSQ	SGSVALAKSH
P40350	ALG5	YPL227C	12	33	TVFFTLLVALVLSLYLLVYLF	ALRFLIENRN	SHTPRPPYPE
Q12001	ALG6	YOR002W	35	56	WLPEYIIFVCAVILRCTIGLG	LYPFRPVGNQ	PYSGKGSPPL
Q12001	ALG6	YOR002W	104	125	AFHSYLLGLIGSFFNPSWFAL	YWGLDYPPLT	EKSRGFESPD
Q12001	ALG6	YOR002W	145	166	VIISDILFYFPAVIYFTKWLG	NGLKTYMRST	RYRNQSPIGQ
Q12001	ALG6	YOR002W	171	192	SPIGQSIAASAILFQPSLMLI	TKWLGRYRNQ	DHGHFQYNSV
Q12001	ALG6	YOR002W	223	244	VCFVLSICFKQMALYYAPIFF	LLDEYYAMAA	AYLLSRSLLF
Q12001	ALG6	YOR002W	263	284	VIAFATLATFAIIFAPLYFLG	FPKFNIARLT	GGLKNIHQCI
Q12001	ALG6	YOR002W	332	353	LYSLIATVIGFLPAMIMTLLH	KERFTIQQLQ	PKKHLLPYVL
Q12001	ALG6	YOR002W	356	377	HLLPYVLIACSMSFFLFSFQV	MIMTLLHPKK	HEKTILIPLL
Q12001	ALG6	YOR002W	398	419	NVLSLVSWINNVALFTLWPLL	ITLLYSSTDW	KKDGLHLQYA
Q12001	ALG6	YOR002W	425	446	LQYAVSFLLSNWLIGNFSFIT	WPLLKKDGLH	PRFLPKSLTP
Q12001	ALG6	YOR002W	481	502	FIIGTYIAMGFYHFLDQFVAP	LLPYNVVWKS	PSKYPDLWVL
Q12001	ALG6	YOR002W	508	529	LWVLLNCAVGFICFSIFWLWS	FVAPPSKYPD	YYKIFTSGSK
P07286	ALG7	YBR243C	23	44	ALVAAVGFGIAGYLATDMLIP	IYYSKNQGPS	RVGKSFIKIG
P07286	ALG7	YBR243C	71	92	IGAIPAAVYLFVMFIYIPFIF	KPGRPVLPET	YKYMVITTSG
P07286	ALG7	YBR243C	128	149	YLSAILCLESTVLLGIADDLF	NIFPHDKLSE	DLRWRHKFFL
P07286	ALG7	YBR243C	156	177	FFLPAIAAIPLLMVYYVDFGV	DLFDLRWRHK	THVLIPGFME
P07286	ALG7	YBR243C	201	222	YVYMASMAIFCPNSINILAGV	KTSVDLGLWY	NGLEVGQCIV
P07286	ALG7	YBR243C	230	251	IVLAILALLNDLLYFSMGPLA	GVNGLEVGQC	TRDSHRFSAV
P07286	ALG7	YBR243C	255	276	HRFSAVLIIPFLGVSLALWKW	SMGPLATRDS	NRWPATVFVG
P07286	ALG7	YBR243C	282	303	VFVGDTYCYFAGMVFAVVGIL	LWKWNRWPAT	GHFSKTMLLL
P07286	ALG7	YBR243C	308	329	TMLLLFIPQIVNFIYSCPQLF	VVGILGHFSK	KLVPCPRHRL
P07286	ALG7	YBR243C	386	407	EIISTSNMTLINLTLVWFGPM	LIDLEFDENN	REDKLCNTIL
P07286	ALG7	YBR243C	418	439	LQFCIGILALLGRHAIGAIIF	EDKLCNTILK	GHDNLWTVR
P40351	ALG8	YOR067C	42	63	SLWNFWISTLFLKLLLIPDYF	TEKGEGSKRY	STDFDVHRNW
P40351	ALG8	YOR067C	92	113	WTLDYPPFFAYFEWFLSQFVP	SEWYYEHTSQ	KSVRDDGCLD
P40351	ALG8	YOR067C	139	160	LTVIFSEILLFVILQIYINTT	FGLPTIVFQR	KLSERSQSFV
P40351	ALG8	YOR067C	168	189	FVVASSIVLSPGFLIIDHIHF	TTKLSERSQS	QYNGFLFAIL
P40351	ALG8	YOR067C	219	240	TAICFKHIFLYLAPCYFVFLL	RYILCAVLYT	RAYVLNVNNF
P40351	ALG8	YOR067C	266	287	LLKLATVVVGIFTICFLPFAH	DFLFLIRWAN	QMPQVLSRLF
P40351	ALG8	YOR067C	307	328	WAPNFWALYSFMDKILTTVML	PFSRGLTHAY	KLPYVHTFAT
P40351	ALG8	YOR067C	382	403	LTFILTIFYQVLAVLPLLFDP	FVILPQIPPK	SFKRFVGSLT
P40351	ALG8	YOR067C	419	440	FLFGWHVHEKAIMLVIIPFTF	GSLTLCGLAS	LVGFDRRLLV
P40351	ALG8	YOR067C	447	468	LLVPFMLVASAGYVSLYPLLY	FTFLVGFDRR	KGQDFFIKTL
P40351	ALG8	YOR067C	470	491	QDFFIKTLYTYVWCIIYFAAF	VSLYPLLYKG	RKTTKISSSV
P40351	ALG8	YOR067C	504	525	IFFLDRLALTYIFSLLPIVTV	TKISSSVERR	LQILDEVKWR
P40351	ALG8	YOR067C	543	564	FLGLMIYSVYCSLGIISSWFA	WRYSFLQKFE	LSWLYNFDEL
P53868	ALG9	YNL219C	7	28	ISLLLLLFLTRVYIQPTFSLI	MNCKAVT	SDCDETFNYW
P53868	ALG9	YNL219C	62	83	SWAFLLPFYCILYPVNKFTDL	WEYSPEYSIR	ESHWNFFITR
P53868	ALG9	YNL219C	86	107	WNFFITRACLGFFSFIMEFKL	VNKFTDLESH	HREIAGSLAL
P53868	ALG9	YNL219C	113	134	SLALQIANIWIIFQLFNPGWF	EFKLHREIAG	HASVELLPSA
P53868	ALG9	YNL219C	176	197	FLASILGWPFVLILSLPLCLH	SNFTKSLAYN	YLFNHRIIST
P53868	ALG9	YNL219C	213	234	CCLIFSLTAFAVIVTDSIFYG	IISTIRTAFD	KLAPVSWNIL
P53868	ALG9	YNL219C	268	289	PLNLLLNFPLPVLVLAILGIF	IFGVEPWYYY	HLRLWPLWAS
P53868	ALG9	YNL219C	316	337	FLYPIYGLITLSASIAFYKVL	FTQQPHKEER	NLFNRKPILK
P53868	ALG9	YNL219C	349	370	IKLSVLLIVAGQAMSRIVALV	FNRKPILKKG	NNYTAPIAVY
P38971	ALP1	YNL270C	73	93	HIGMIALGGTIGTGLIIGIG	REVKRKLKQR	PPLAHAGPVG
P38971	ALP1	YNL270C	95	116	LAHAGPVGALISYLFMGTVIY	TGLIIGIGPP	SVTQSLGEMV
	ALP1	YNL270C	125	143	VTFIPVTSSFSVFAQRFL	YSVTQSLGEM	SPALGATNGY
P38971	ALP1	YNL270C	153	174	MYWLSWCFTFALELSVLGKVI	SPALGATNGY	QYWTEAVPLA
P38971	ALP1	YNL270C	179	200	AVPLAAWIVIFWCLLTSMNMF	LGKVIQYWTE	PVKYYGEFEF
P38971	ALP1	YNL270C	209	230	FCIASIKVIALLGFIIFSFCV	FPVKYYGEFE	VCGAGQSDGP
P38971	ALP1	YNL270C	265	286	FLGWVSSLINAAFTYQGTELV	IISSDKNEGR	GITAGEAANP
P38971	ALP1	YNL270C	306	327	VVVRILVFYILSLFFIGLLVP	RKALPRAIKK	YNDPKLDSDG
P38971	ALP1	YNL270C	359	380	IFNAVVLITILSAGNSNVYIG	ENSGTKVLPD	SRVLYSLSKN
P38971	ALP1	YNL270C	403	424	GVPYFSVLSTSVFGFLAFLEV	PRFLSNVTRG	SAGSGKAFNW
P38971	ALP1	YNL270C	431	452	FNWLLNITGVAGFFAWLLISF	LEVSAGSGKA	SHIRFMQAIR
P38971	ALP1	YNL270C	477	498	MPFLAYYASFFIALIVLIQGF	RDDLPYKAQM	TAFAPTFQPI
P38971	ALP1	YNL270C	510	531	VAAYISIFLFLAIWLSFQVWF	FAPTFQPIDF	KCRLLWKLQD
Q08269	ALR1	YOL130W	743	764	TMIGTMLVPLNVITGLFGMNV	NKVTEMLGKV	KVPGENSSIA
Q08269	ALR1	YOL130W	772	793	IAWWFGILGVLLLLAVLGWFL	NVKVPGENSS	ASYWIKRIDP
P43553	ALR2	YFL050C	741	762	VTMLGTMLVPLNVITGLFGMN	NNKVTEMLGK	VKVPGRNGSI
P43553	ALR2	YFL050C	771	792	IAWWYGILGVLLLLAVISWFL	NVKVPGRNGS	ASYWIKKIDP
P32629	ANP1	YEL036C	15	27	SIAGTLLTVFFL	RKLSFNPTTV	TRLVLSFFSI
Q06497	ANT1	YPR128C	0	21	MLTLESALTGAVASAMANIAV		YPLDLSKTII
Q06497	ANT1	YPR128C	77	98	TVTTVATFVQNFVYFFWYTFI	KGILGLYQGM	RKSYMKHKLL
Q06497	ANT1	YPR128C	127	148	LVLGVAAASISQLFTSPMAVV	GPITPSTIEE	ATRQQTVHSA
Q06497	ANT1	YPR128C	184	202	LRTGLALTINPSITYASF	NGDITAFWKG	QRLKEVFFHD
Q06497	ANT1	YPR128C	225	246	FILGVLSKMISTLVTQPLIVA	DAGSLSAVQN	KAMLQSAGSK
Q06497	ANT1	YPR128C	276	297	WKGVLPQLTKGVIVQGLLFAF	LYKNEGLKSL	RGELTKSLKR
P40532	APQ12	YIL040W	39	58	LVFQLLFIFFTFYVFYKLL	TITKFSQSHP	MNFITLVKRF
P40532	APQ12	YIL040W	67	84	FLYLTLVVTCIGIYMRG	LMNFITLVKR	SQQFLTVDLL
P53943	AQR1	YNL065W	99	120	WGMVAILTMCGFWSSLGSPIY	PYTLLSYGQK	YPALRQLEKQ
P53943	AQR1	YNL065W	139	160	VTVVVYLLFQGISPTVSGGLA	QFNVDENMVN	DCFGRRPIIL
P53943	AQR1	YNL065W	166	187	PIILAGMLIYVIASIGLACAP	GGLADCFGRR	SYGVIIFLRC
P53943	AQR1	YNL065W	188	209	YGVIIFLRCIQSIGISPTIAI	ASIGLACAPS	SSGVVGDFTL
P53943	AQR1	YNL065W	225	246	FVGATSGFVLLGQCFGSLIGA	DFTLKHERGT	VLTARWDWRA
P53943	AQR1	YNL065W	255	276	AIFWFLTIGCGSCFLIAFLIL	AVLTARWDWR	PETKRTIAGN
P53943	AQR1	YNL065W	334	355	ILVLPEIILSLFPSGLLFAMW	PKLDLSSAGK	TLMLSSISSG
P53943	AQR1	YNL065W	374	395	LVIIGVCYLPGGIGGLMGSFF	GLSVAPYNYH	TGRIIDMYFK
P53943	AQR1	YNL065W	433	454	VCLLPQNFLAVVAYLLFGWSI	AEINMFKVRL	DKGWRIESIL
P53943	AQR1	YNL065W	459	480	IESILITSFVCSYCAMSTLST	FGWSIDKGWR	STTLLVDLYP
P53943	AQR1	YNL065W	523	544	VGGTFTFLCALVFFFNFLMFI	CFAKMKAAMT	PMKYGMKWRE
P0CD91	AQY1	YPR192W	48	69	FIAAVGEFCGTFMFLWCAYVI	KISRDTLRDH	CNVANHDVAL
P0CD91	AQY1	YPR192W	91	112	IMIAIGFGFSVMFSIWCFAGV	APDGSHPGQL	SGGALNPAMS
P0CD91	AQY1	YPR192W	136	157	VVMWVSQIVAGMAAGGAASAM	LARAVSPTRC	TPGEVLFANS
P0CD91	AQY1	YPR192W	176	197	GLFLEMFGTAILCLTVLMTAV	SLGLGCSRTR	EKRETNFMAA
P0CD91	AQY1	YPR192W	203	224	FMAALPIGISLFIAHVALTAY	MTAVEKRETN	TGTGVNPARS
P0CD91	AQY1	YPR192W	248	269	WIYWIGTLLGSILAWSVWQLL	VAARYFPHYH	QILDYTTYVT
P0CD90	AQY2	YLL052C	47	68	FIAAVGEFCGTFMFLWCAYVI	NIDRDTLRNH	CNVANHDVAL
P0CD90	AQY2	YLL052C	89	110	LIMIALGFGFSVMFSIWCFWW	TEPEGSHPGQ	GFEPSRFSLF
P25628	ARE1	YCR048W	181	202	LESNFSGIYVFAWMFLGWIAI	DKADAPPGEK	RCCTDYYASY
P25628	ARE1	YCR048W	228	249	LFTIAMLDLAMFLCTFFVVFV	LEIVQYMTTD	HWLVKKRIIN
P25628	ARE1	YCR048W	263	284	GFVAVSIFELAFIPVTFPIYV	KKRIINWKWT	YYFDFNWVTR
	ARE1	YCR048W	290	313	WVTRIFLFLHSVVFVMKSHSFAF	PIYVYYFDFN	YNGYLWDIKQ
P25628	ARE1	YCR048W	370	391	ISCSNFFMFCLFPVLVYQINY	QTKDNDFPNN	PRTSRIRWRY
P25628	ARE1	YCR048W	408	429	IIGTIFLMMVTAQFFMHPVAM	WRYVLEKVCA	RCIQFHNTPT
	ARE1	YCR048W	449	472	WFHLLFDMIPGFTVLYMLTFYMI	FGGWIPATQE	WDALLNCVAE
P25628	ARE1	YCR048W	534	555	ATLFTFFLSAVFHEMAMFAIF	MGALHLSKSQ	RRVRGYLFMF
P25628	ARE1	YCR048W	589	610	VVFSFGVCSGPSIIMTLYLTL	FLRARPQLSN
P53629	ARE2	YNR019W	214	235	FSGLYVAFWMAIAFGAVKALI	TVETTIISSN	DYYYQHNGSF
	ARE2	YNR019W	253	276	MTTNLFTVASVDLLMYLSTYFVV	SFKDSEILKF	GIQYLCKWGV
P53629	ARE2	YNR019W	291	312	TGWIFTSIYEFLFVIFYMYLT	CKWGVLKWGT	ENILKLHWLS
	ARE2	YNR019W	325	348	LFLHSLVLLMKMHSFAFYNGYLW	LKLHWLSKIF	GIKEELQFSK
P53629	ARE2	YNR019W	403	424	ISAKSFFWFTMFPTLIYQIEY	SDQTQKFPNN	PRTKEIRWSY
P53629	ARE2	YNR019W	441	462	IFGTIFLMMIDAQILMYPVAM	WSYVLEKICA	RALAVRNSEW
P53629	ARE2	YNR019W	484	505	LLVDIVPGFIVMYILDFYLIW	ILDRLLKWVG	DAILNCVAEL
P53629	ARE2	YNR019W	566	587	ATLMTFFLSSVVHELAMYVIF	MSSFKLNKSQ	KKLRFYLFFF
P53629	ARE2	YNR019W	621	642	VIFWLGICMGPSVMCTLYLTF	FMRNRTIIGN
P38731	ARN1	YHL040C	70	91	WYLQAILLLSAFICGYGYGLD	TEIIGSAYNK	GNIRYIYTGY
P38731	ARN1	YHL040C	110	131	LLSTINVINAVVSAASQIIYA	YATSSYSEHS	RLSDVFGRLY
P38731	ARN1	YHL040C	135	156	VFGRLYLFISAVILYVVGTII	SQIIYARLSD	QSQAYDVQRY
P38731	ARN1	YHL040C	167	188	AGAIFYNAGYVGVILILLIIL	SQAYDVQRYA	SDFSSLKWRL
P38731	ARN1	YHL040C	197	218	LLYQFVPTWPFIINTWIAGNI	LSDFSSLKWR	TSRANPVVNW
P38731	ARN1	YHL040C	231	252	VGMWAFIFPLSCVPIVLCMLH	ANPVVNWSWD	MQWRARKTPE
P38731	ARN1	YHL040C	290	311	VVGVLLMGCSLGCILVPLTLA	ILKQLFWMLD	GGVKTTWNDS
P38731	ARN1	YHL040C	323	344	IGPFVLGFVLIPILWIWEYRF	VKTTWNDSRL	ARDPILPYRL
P38731	ARN1	YHL040C	367	388	FLIDFIYYMAADYLYTVMIVA	RAVWSSMGIS	VNESVKSATR
P38731	ARN1	YHL040C	398	419	IATLSSFVSTVASPFFALLVT	VNESVKSATR	RCTRLKPFIM
P38731	ARN1	YHL040C	424	445	KPFIMFGCALWMVAMGLLYHF	ALLVTRCTRL	RGGSQSHSGI
P38731	ARN1	YHL040C	454	475	IIGALCVWGVGTTLFTYPVTV	FRGGSQSHSG	SVQSAVSHEN
	ARN1	YHL040C	493	516	YTLYRIGSAVGSAVSGAIWTQTL	ENMATVTALN	YKQILKRMGD
P38731	ARN1	YHL040C	563	584	LETIVALVFCVPLIAFSLCLR	LMNAYKYVQR	DPKLTDTVAV
P38724	ARN2	YHL047C	70	93	IFLFSAFICTFAYGLDSSIRGTY	KKYDTWQLKA	MTYAMNSYSA
P38724	ARN2	YHL047C	105	128	LISTVSVIVLMISAVSQVIFGGL	YAMNSYSAHS	SDIFGRLTLF
P38724	ARN2	YHL047C	134	152	LTLFLVSIVLYIVGTIIQ	FGGLSDIFGR	SQAYDVQRYA
P38724	ARN2	YHL047C	161	184	AAGAVFYYVGLVGVMLQVVLMLS	QSQAYDVQRY	DNSSLKWRLF
P38724	ARN2	YHL047C	190	213	WRLFYTLIPSWPSIITTWVSGSV	LMLSDNSSLK	VEAANPLENW
P38724	ARN2	YHL047C	222	245	WSWNIAMWAFIFPLCCIPLILCM	VVEAANPLEN	LHMRWKVRND
P38724	ARN2	YHL047C	285	308	VVGVLLFTAGVGCILVPLTLAGG	MLVQLFWKLD	VSTNWRNSKI
P38724	ARN2	YHL047C	317	335	IIGPFVLGFVLVPGFIYW	GVSTNWRNSK	ESRLALVPFA
P38724	ARN2	YHL047C	354	377	VWAPLGIMFFICFVYQMAAGYLY	APFKLLKDRG	TILVVAVDES
P38724	ARN2	YHL047C	391	414	TRIINLYSFVTAVVAPFLGLIVT	VAVDESASSA	RSSRLKSYII
P38724	ARN2	YHL047C	420	438	SYIIFGGSLYFITMGLFY	LIVTRSSRLK	RYRSGQDADG
P38724	ARN2	YHL047C	447	470	GGIIAGMVIWGLSSCLFDYPTIV	YRYRSGQDAD	SIQSVTSHEN
P38724	ARN2	YHL047C	490	513	VFRIGGAVAAAISGAIWTQSLYP	MATVTALNYT	KLLHYMGDAD
P38724	ARN2	YHL047C	560	578	VIVALVFSAPMFLLTFCV	EAYRHVQKYE	RDPRLTEDFA
Q06598	ARR3	YPR201W	34	55	LMLPFTIILSIIIAVIISVYV	TTIKSLSWLD	PSSRHTFDAE
Q06598	ARR3	YPR201W	69	90	LMGVSIPLTVGMIVMMIPPIC	HTFDAEGHPN	KVSWESIHKY
Q06598	ARR3	YPR201W	113	134	LFLNWVIGPLLMTALAWMALF	SYIRKQLALS	DYKEYRQGII
Q06598	ARR3	YPR201W	141	162	GIIMIGVARCIAMVLIWNQIA	ALFDYKEYRQ	GGDNDLCVVL
Q06598	ARR3	YPR201W	169	190	VVLVITNSLLQMVLYAPLQIF	QIAGGDNDLC	YCYVISHDHL
Q06598	ARR3	YPR201W	216	237	VFLGIPLGIGIIIRLGSLTIA	LFEEVAKSVG	GKSNYEKYIL
Q06598	ARR3	YPR201W	245	266	ILRFISPWAMIGFHYTLFVIF	IAGKSNYEKY	ISRGYQFIHE
Q06598	ARR3	YPR201W	280	301	ILCFVPLVLYFFIAWFLTFAL	YQFIHEIGSA	MRYLSISRSD
Q06598	ARR3	YPR201W	343	364	CFTMASNNFELSLAIAISLYG	EASFSITMTQ	NNSKQAIAAT
Q06598	ARR3	YPR201W	369	390	AIAATFGPLLEVPILLILAIV	ISLYGNNSKQ	ARILKPYYIW
Q06541	ARV1	YLR242C	178	199	FASYCILDVSLFHTFTQYFIL	TWSPPIQYLY	KKLHWKHYSV
Q06541	ARV1	YLR242C	213	234	VISYTILLSYGAKIFPILMLI	WKHYSVSSKD	WPYDTLISMS
Q06541	ARV1	YLR242C	247	270	WVANLYIIESLKIVTNLSYWNII	DTLISMSIIK	KIFISVSLLR
Q06541	ARV1	YLR242C	271	292	IFISVSLLRYFMVKPILIVFV	TNLSYWNIIK	AKFNFSVIKN
P46993	ASG7	YJL170C	49	70	FFVFGILCPVFWLVNLLAWWF	SVPVQPWLPR	LQYWQPHELE
P46993	ASG7	YJL170C	184	205	LRSLLGLLIDSILIIFVVLLC	LLRKTFRDWN	KKSR
P54074	ASI1	YMR119W	69	90	VFDTIGFFFSPYAIFCFVIAI	SEEIPPTLRS	VLNRFVVFYA
P54074	ASI1	YMR119W	116	137	VFHVSAVVVLAMVSLGPLTLG	RRTLPLWLSN	KDFKILGDPA
P54074	ASI1	YMR119W	152	173	FLLNIFYAFAYSYCVETIFTI	LGDPAFAQEK	MRNSSPLEGT
P54074	ASI1	YMR119W	209	230	YIIDCSMAILSRILIHLVEIF	NNTKFLDSPD	RLRNYRLLFS
	ASI1	YMR119W	236	255	LLFSTIMNLCHICYLGIRV	VEIFRLRNYR	KQGGWKSLPF
P54074	ASI1	YMR119W	273	294	KLFSVSIICLSLLIFKLSCLI	PFSVKFRHFP	RWDPFGKSRN
	ASI2	YNL159C	116	139	TFLRNLFILDYFIGLILFPFSVY	FTARQQSPLR	NILRSGFNSM
P53895	ASI2	YNL159C	222	243	LMFAKAFELFVKVSTILIYLA	GNEPNLNWIR	YGVSGTVYMV
P53895	ASI2	YNL159C	247	268	GTVYMVTAGFFFVLCLLFTVI	ILIYLAYGVS	RRYKGVHRML
P53983	ASI3	YNL008C	78	99	MFFSYSVSKYAVLCFSTAIIL	TLQLAKVGIR	NRLTVMSSLR
P53983	ASI3	YNL008C	126	147	LVATLSLVKALLQILSQFGLM	LPLWSKTLLH	HELHVSDTDF
P53983	ASI3	YNL008C	156	177	FYALSVYLFVALSDCIEIFIS	MHELHVSDTD	STTNVPSLIC
P53983	ASI3	YNL008C	181	202	VPSLICSDFSIWGLSLNLYII	IEIFISSTTN	SKMPAGQQHI
P53983	ASI3	YNL008C	277	298	GFFYISTILLASIGIFLKALF	NICLIHNYFP	TSNPFRSLYS
P25641	ATG15	YCR068W	14	35	LHLGCILTLTVLCLIAYYFAL	SPSRKRFASP	PDYLSVGKSS
P25568	ATG22	YCL038C	98	119	YVFSLSVLFQTIIVISVSGIV	IFVDTSSFAL	DLWGSVKFKG
P25568	ATG22	YCL038C	130	151	ILVWFGIVGALSTVAISKLND	LWGSVKFKGR	TQIYSLAGLY
P25568	ATG22	YCL038C	153	174	IYSLAGLYIVANGCFGVINVV	VAISKLNDTQ	GNSLLPIFVK
P25568	ATG22	YCL038C	210	231	GASLGYSSALIVQIVSMFLVA	DSLTTVISGR	SKKGSKQDVQ
P25568	ATG22	YCL038C	241	262	VAVLFVGIWWFVWQLPMIWLI	SKKGSKQDVQ	DDVTIPIRVD
P25568	ATG22	YCL038C	318	339	VMIFLIAWFIISDSITTINST	SFKHARLLKD	AVLFSKAELH
P25568	ATG22	YCL038C	352	373	LNLIMISVLTVVNAMLGAFMI	FSKAELHMST	PQFLATKFRW
P25568	ATG22	YCL038C	388	409	LMYIIIWASFIPFYGILGFFF	TKFRWTSSQT	NAFGLKHKFE
P25568	ATG22	YCL038C	417	438	FEMFLLAIWYGLSLGGLSAVS	FFNAFGLKHK	RSVFSLIVPP
P25568	ATG22	YCL038C	485	506	SFYFFFLLLMLSLPVLNCLDV	LTDKTHNIRY	KRGRREAEEL
P46989	ATG27	YJL178C	199	220	FTWLFLYALLFTLIYLMVVSF	PAKKAGGTSW	LNTRGGSFQD
P40458	ATG32	YIL146C	389	414	WFTWGISITIGISFGCCVTYFVTAA	KRKKQKFFTS	YEHQTVKSLS
Q06485	ATG33	YLR356W	9	30	GIAVSSIGLYSGLLASASLIT	MSVCLAITK	STTPLEVLTG
Q06485	ATG33	YLR356W	51	72	AATALGAFASTFFCVSFFGAP	LTPTLTTLKN	PSLRHPYLLY
Q06485	ATG33	YLR356W	77	98	PYLLYGMLVAPLSSFVLGCAS	FFGAPPSLRH	NYQSRKYSKV
Q06485	ATG33	YLR356W	171	192	LIAATAIAIVGFVQAVIGVYG	HTGPPIHTKN	EGQFI
Q06159	ATG39	YLR312C	147	164	VIMLSSLLSMTFSYLAL	GKSAKLKMWH	EYSLTGDVLA
	ATG40	YOR152C	4	27	ILWPLFLLTSVAIPLQLTLEVVY	MFNL	LTSSVDFSKA
Q99325	ATG40	YOR152C	67	88	FIHFIYLYTPIDAFLNFLPFT	SLLKYWSLYE	SLLMSFGSIC
Q12142	ATG9	YDL149W	318	339	FYCIILEKILNICTLLFVVFV	DVYNYYLGNG	STYMGHCVDY
Q12142	ATG9	YDL149W	376	397	FFLWMFYFFVILKIVQLYFDV	YSNSITGFTK	QKLSELQNFY
Q12142	ATG9	YDL149W	538	559	GFLNIILAPFLVTYFVLLYFF	EELQKRFMLA	RYFNEYKTSP
Q12142	ATG9	YDL149W	620	641	FLKFVSFICGSFVAILAFLTV	DQFPKEKTNL	FDPENFLNFE
Q12142	ATG9	YDL149W	656	677	SVIFYITILGAIWSVSRNTIT	FLNFEITSDR	QEYHVFDPEE
Q12142	ATG9	YDL149W	723	744	IVILLRELTSLMITPFVLWFS	LEFCKLYNLR	LPSSAGRIVD
P40416	ATM1	YMR301C	110	132	VLIALGLLISAKILNVQVPFFF	PKGNNKVRIR	KQTIDSMNIA
P40416	ATM1	YMR301C	155	179	LTILCYGVARFGSVLFGELRNAVF	PTVALPAAIG	AKVAQNAIRT
P40416	ATM1	YMR301C	228	252	LTAMVFHIIPISFEISVVCGILTY	DRGTKGISQV	QFGASFAAIT
P40416	ATM1	YMR301C	253	274	FGASFAAITFSTMLLYSIFTI	SVVCGILTYQ	KTTAWRTHFR
P40416	ATM1	YMR301C	340	359	FLNSGQNLIFTTALTAMMY	SQIKVSQSLA	MGCTGVIGGN
P40416	ATM1	YMR301C	374	396	LVLINQLVFQLSVPLNFLGSVY	VIGGNLTVGD	RDLKQSLIDM
P32907	ATO2	YNR002C	86	107	ANPAPLGLSGFALTTFVLSMF	GLAPAPVHKF	NARAQGITIP
P32907	ATO2	YNR002C	119	140	VVGCAMFYGGLVQLIAGIWEI	RAQGITIPNV	ALENTFGGTA
P32907	ATO2	YNR002C	150	171	LCSFGGFWLSFGAIYIPWFGI	ALENTFGGTA	LDAYKDKESD
P32907	ATO2	YNR002C	184	205	ALGFYLLGWALFTFGLSVCTM	YKDKESDLGN	KSTIMFFALF
P32907	ATO2	YNR002C	207	228	TIMFFALFFLLAVTFLLLSIA	FGLSVCTMKS	NFTGEVGVTR
P32907	ATO2	YNR002C	238	259	AGGVLGVIVAFIAWYNAYAGI	NFTGEVGVTR	ATRQNSYIMV
Q12359	ATO3	YDR384C	84	105	ANPVPLGLASFSLSCLVLSLI	NCAKYTPHQF	NANVRGVTDG
Q12359	ATO3	YDR384C	120	141	LFMFFGGAIELFAGLLCFVIG	GVTDGKWALS	DTYAMTVFSS
	ATO3	YDR384C	143	163	YAMTVFSSFGGFWICYGYGL	GLLCFVIGDT	TDTDNLVSGY
Q12359	ATO3	YDR384C	181	202	VIGFFLAGWTVFTFLMLMCTL	GYTDPTMLNN	KSTWGLFLLL
Q12359	ATO3	YDR384C	207	228	LFLLLTFLDLTFLLLCIGTFI	LMCTLKSTWG	DNNNLKMAGG
Q12359	ATO3	YDR384C	236	257	GGYFGILSSCCGWYSLYCSVV	FIDNNNLKMA	SPSNSYLAFR
P81450	ATP18	YML081C-A	8	25	ILKVYWPFFVAGAAVYY	MLKRFPTP	GMSKAADLSS
P81451	ATP19	YOL077W-A	14	31	HQLAIGTLGLLGLLVVP	YHFMGKAIPP	NPFKSAKPKT
P13090	ATR1	YML116W	108	129	WLMASFPLVSGSFILISGRLG	SFGSEGNSKS	DIYGLKKMLL
P13090	ATR1	YML116W	136	157	MLLVGYVLVIIWSLICGITKY	RLGDIYGLKK	SGSDTFFIIS
P13090	ATR1	YML116W	172	193	LGIAFVLPNVLGIIGNIYVGG	FFIISRAFQG	TFRKNIVISF
P13090	ATR1	YML116W	198	219	IVISFVGAMAPIGATLGCLFA	IYVGGTFRKN	GLIGTEDPKQ
P13090	ATR1	YML116W	231	252	WAFYAYSIAAFINFVLSIYAI	IGTEDPKQWP	PSTIPTNIHH
P13090	ATR1	YML116W	262	283	FSMDWIGSVLGVIGLILLNFV	PSTIPTNIHH	WNQAPISGWN
P13090	ATR1	YML116W	295	316	YIIVILIISVIFLVVFIIYEI	QAPISGWNQA	RFAKTPLLPR
P13090	ATR1	YML116W	333	354	MIQIMLALFFGWGSFGIFTFY	LPRAVIKDRH	YFQFQLNIRQ
P13090	ATR1	YML116W	371	392	GTYFMFLIWGIIAALLVGFTI	IRQYTALWAG	KNVSPSVFLF
P13090	ATR1	YML116W	399	420	FLFFSMVAFNVGSIMASVTPV	FTIKNVSPSV	HETYFRTQLG
P13090	ATR1	YML116W	429	450	GTMIILSFGMDLSFPASSIIF	VHETYFRTQL	SDNLPMEYQG
	ATR1	YML116W	461	484	AGSLVNTVVNYSMSLCLGMGATV	DNLPMEYQGM	ETQVNSDGKH
P13090	ATR1	YML116W	505	526	GIGLASLACMISGLYMVESFI	LKGYRGAQYL	KGRRARAAAE
Q12067	ATX2	YOR079C	2	23	FLGVILLASFLLIATFLIGLI	MK	PLYYIDKQKS
Q12067	ATX2	YOR079C	67	88	IAVLSQFGIGMLLGTSFMLVI	NDDVSSYRVK	PEGIKACVEH
Q12067	ATX2	YOR079C	103	124	VNLLIGFLGVYVLDRLVTLWV	ACVEHDGNVG	SRKQTVYTHD
Q12067	ATX2	YOR079C	154	175	LIQNNVVFALFIHGLSDGIAL	INHPRQIWMN	GTTTNNDSLL
Q12067	ATX2	YOR079C	183	204	LLIVVLIAIVIHKIPAVLSLT	ALGTTTNNDS	SLMVSRQNLM
Q12067	ATX2	YOR079C	217	238	VICNVFLFASSTPIGYIVLSL	VSRQNLMKWE	LNLSHSPTMD
Q12067	ATX2	YOR079C	251	272	GNLLLMSGGSLLYASFTAFVG	SHSPTMDWIS	GDSHDHDLSV
Q12067	ATX2	YOR079C	285	306	VVLPHDESVYVLIGVCIPLVI	HDHDLSVEQE	SYCISEE
P36107	AUR1	YKL004W	41	62	LSDWVHYIFLGSIMLFVFITN	LLKVQKYKPA	PAPWIFKILF
P36107	AUR1	YKL004W	64	85	PWIFKILFYCFLGTLFIIPAT	MLFVFITNPA	SQFFFNALPI
P36107	AUR1	YKL004W	87	108	FFFNALPILTWVALYFTSSYF	TLFIIPATSQ	PDDRRPPITV
P36107	AUR1	YKL004W	155	176	FHFGAPFVVAAILFVFGPPTV	DILAWLPYGL	LQGYAFAFGY
P36107	AUR1	YKL004W	178	199	GYAFAFGYMNLFGVIMQNVFP	FVFGPPTVLQ	AAPPWYKILY
P36107	AUR1	YKL004W	245	266	VIFGAFPSLHSGCATMEALFF	MYTTAFSNSS	CYCFPKLKPL
P36107	AUR1	YKL004W	268	289	CFPKLKPLFIAYVCWLWWSTM	ATMEALFFCY	YLTHHYFVDL
P36107	AUR1	YKL004W	291	312	THHYFVDLMAGSVLSYVIFQY	CWLWWSTMYL	TKYTHLPIVD
	AUS1	YOR011W	388	408	MTAQFISVVIQSLVIGSLFY	FQRSLGDKAY	EIPLTTIGSY
Q08409	AUS1	YOR011W	420	443	GSLTFFSILFFTFLSLADMPIAF	PLTTIGSYSR	QRQPVVKKQS
Q08409	AUS1	YOR011W	467	490	TVFDYCFKLCLVIVFSIILYFLA	YTNWVETLST	HLQYKAARFF
Q08409	AUS1	YOR011W	496	519	ARFFIFLLFLSFYNFCMVSLFAL	YFLAHLQYKA	TTLVAPTISV
Q08409	AUS1	YOR011W	528	551	VANLFAGILLLAIAMYASYVIYL	LTTLVAPTIS	KNMHPWFVWI
Q08409	AUS1	YOR011W	557	575	FVWIAYLNPAMYAMEAIL	VIYLKNMHPW	SNELYNLKLD
Q08409	AUS1	YOR011W	635	658	VWRNFGIIIGFLVFFIACTLFAS	KQGLSYTYHH	QYIKPYFNKD
Q08409	AUS1	YOR011W	1080	1103	YVMAKYCLNGGAGLFIGFSFWHI	QYICTKRDMT	KHNIIGLQDS
Q08409	AUS1	YOR011W	1106	1129	IIGLQDSIFFCFMALCVSSPLIN	GFSFWHIKHN	QIQDKALKTK
Q08409	AUS1	YOR011W	1155	1178	VLLLSQSIIELPLALTSSTLFFV	EARSNTYHWT	CAFFSCGFNN
Q08409	AUS1	YOR011W	1192	1215	AGVFFLNYMLFAAYYSTLGLWLI	SCGFNNAGWS	YTAPNLQTAA
Q08409	AUS1	YOR011W	1223	1246	AAVFVAFIYSFTASFCGVMQPYS	LIYTAPNLQT	LFPTFWKFMY
Q08409	AUS1	YOR011W	1345	1368	FGIEWAFVGFNFFAMFAGYYLTY	NMSYDHVWRN	VARIWPKVFK
P47082	AVT1	YJR001W	208	231	TAPQTIFNSINVLIGIGLLALPL	KVVTLLAGQS	GLKYAGWVIG
P47082	AVT1	YJR001W	240	261	GLTMLAIFALATFCTAELLSR	LGLKYAGWVI	CLDTDPTLIS
P47082	AVT1	YJR001W	286	307	LISALFTLDLLGSGVSLVILF	YAAFGTKGRA	GDSLNALFPQ
P47082	AVT1	YJR001W	321	342	FFKIVSFFIVTPPVFIPLSVL	NALFPQYSTT	SNISLLGILS
P47082	AVT1	YJR001W	344	365	ISLLGILSTTGTVLVICCCGL	VFIPLSVLSN	YKSSSPGSLV
P47082	AVT1	YJR001W	389	410	LCLSIGLLSACWGGHAVFPNL	TSMWPIDLKH	KTDMRHPDKF
P47082	AVT1	YJR001W	429	450	ITSVTDIGTAVIGFLMFGNLV	FKDCLKTTYK	KDEITKNVLL
P47082	AVT1	YJR001W	466	487	FVYGLISALMTIIPIAKTPLN	NVLLTEGYPK	ARPIVSVLDV
P47082	AVT1	YJR001W	517	538	GLQVFNRIFINVVFVLIAINF	ASAIKRRAAK	PEFDKIIAFL
P47082	AVT1	YJR001W	543	564	IIAFLGAGLCFTICLILPCWF	IAINFPEFDK	YLRLCKTTIK
P47082	AVT1	YJR001W	580	601	CHVTICISVVLSTLGVGAAII	TTIKPWERVA	S
P39981	AVT2	YEL064C	71	92	AFMNLANSILGAGIITQPFAI	ENDKKSSMRM	KNAGILGGLL
P39981	AVT2	YEL064C	94	115	AGILGGLLSYVALGFIVDWTL	IITQPFAIKN	RLIVINLTLA
P39981	AVT2	YEL064C	144	165	LILFTNGLFAFGGCIGYCIII	EHVMGKKGKL	GDTIPHVLRA
	AVT2	YEL064C	185	205	FWLRRNVIIVMVTTFISFPL	IFSQNDGNVH	SMKRNIEALS
P39981	AVT2	YEL064C	213	234	LSKASFLAVISMIIIVLTVVI	PLSMKRNIEA	RGPMLPYDWK
P39981	AVT2	YEL064C	262	283	LSVISFALVCHHNTSFIFFSM	FFMKATIFRS	RNRSVAKFTR
P39981	AVT2	YEL064C	296	317	ISIIISVICCALMGYSGFAVF	SVAKFTRLTH	KEKTKGNVLN
P39981	AVT2	YEL064C	337	358	IARLCFGFNMLTTFPMEIFVL	SFPGTDTAIN	RDVVGNLLHE
P39981	AVT2	YEL064C	393	414	VFITMGISLTTCNLGALFELI	KQHVVITSSL	GATTASTMAY
P39981	AVT2	YEL064C	446	467	FYLCICFGFMIMIISSTQTII	KKKSWKERLP	DAVNGSDGQH
P36062	AVT3	YKL146W	301	322	AVLLLLKSFVGTGVLFLPKAF	RHPHKSSTVK	HNGGWGFSAL
P36062	AVT3	YKL146W	328	349	FSALCLLSCALISYGCFVSLI	PKAFHNGGWG	TTKDKVGVDG
P36062	AVT3	YKL146W	373	394	FAILSSIALSQIGFSAAYTVF	GRILYGPKMK	TATNLQVFSE
P36062	AVT3	YKL146W	411	432	GSISLATYIFAQVLIFVPLSL	FSENFFHLKP	TRNIAKLSGT
P36062	AVT3	YKL146W	442	463	ALIADLFILLGLVYVYVYSIY	TRNIAKLSGT	YIAVNGVASD
P36062	AVT3	YKL146W	482	503	WSLFIGTAIFTFEGIGLLIPI	DTMLMFNKAD	QESMKHPKHF
P36062	AVT3	YKL146W	518	539	AVMCIVAVIFISCGLLCYAAF	HPKHFRPSLS	GSDVKTVVLL
P36062	AVT3	YKL146W	560	581	VQLLYALAILLSTPLQLFPAI	FPQDTSYTLT	RILENWTFPS
P36062	AVT3	YKL146W	606	627	YFRCAIVVLTSILAWVGANDL	YNPKVKWLKN	DKFVSLVGSF
P36062	AVT3	YKL146W	629	650	FVSLVGSFACIPLIYIYPPLL	AWVGANDLDK	HYKASILSGT
P36062	AVT3	YKL146W	664	685	LLLDLIVIVFGVAVMAYTSWQ	SILSGTSRAR	TIKMWSQ
P50944	AVT4	YNL101W	242	263	FLEFLYVFGHFAGESFEDDFI	IDKVPFLTRN	PDSSNMMIRG
P50944	AVT4	YNL101W	301	322	VFLILLKSFIGTGVLFLPNAF	SAKGTTSTKK	HNGGLFFSVS
P50944	AVT4	YNL101W	326	347	LFFSVSMLAFFGIYSYWCYYI	FLPNAFHNGG	LVQAKSSCGV
P50944	AVT4	YNL101W	373	394	IIILFSLVITQVGFSGAYMIF	GLKLYGPWMR	TAKNLQAFLD
P50944	AVT4	YNL101W	410	431	VLPLSYLMVFQTIIFIPLSFI	AFLDNVFHVG	RNISKLSLPS
P50944	AVT4	YNL101W	438	459	LPSLLANFFIMAGLVIVIIFT	SFIRNISKLS	AKRLFFDLMG
P50944	AVT4	YNL101W	483	504	WTLFIGTAIFAFEGIGLIIPV	GVVYGLNADR	QDSMRNPEKF
P50944	AVT4	YNL101W	515	536	LVLALVILTATILFISIATLG	DSMRNPEKFP	YLAYGSNVQT
P50944	AVT4	YNL101W	561	582	IQLFYSIAIMLSTPLQLFPAI	LPQSNIFVNL	KIIENKFFPK
P50944	AVT4	YNL101W	621	642	WLKNFIRSIIVIIVVSIAYFG	NSGKLNWKIK	SDNLDKFVSV
P50944	AVT4	YNL101W	648	669	FVSVIGSLACIPLVYIYPSML	AYFGSDNLDK	HLRGNSLPET
P50944	AVT4	YNL101W	692	711	ILIFFGIASMLYTSYQSIF	FWRFKPMLDT	GV
P38176	AVT5	YBL089W	7	28	GVLTLLHTACGAGVLAMPFAF	MPSNVRS	KPFGLMPGLI
P38176	AVT5	YBL089W	32	53	LMPGLITLTFCGICSLCGLLL	AMPFAFKPFG	QTRIAKYVPK
P38176	AVT5	YBL089W	81	102	VVFDFAIAVKCFGVGVSYLII	LTQLINPSIS	VGDLVPQIVQ
P38176	AVT5	YBL089W	130	151	FLDRRLYITLIIVFVISPLCF	NMSGSQEHHM	KRSLNSLRYA
P38176	AVT5	YBL089W	160	181	ASMIAIVSVAYLSGLIIYHFV	FKRSLNSLRY	NRHQLERGQV
P38176	AVT5	YBL089W	205	226	LTTLPIFVFAYTCHHNMFSVI	PHGDSQSHSP	NEQVDKSFKV
P38176	AVT5	YBL089W	239	260	IPIFAIVLAYFLYIIIGGTGY	VDKSFKVIRR	MTFGENIVGN
P38176	AVT5	YBL089W	277	298	SISTTIGRLAMLLLVMLAFPL	VGNILTLYPN	QCHPCRSSVK
P38176	AVT5	YBL089W	363	384	IITLCILLFSYLLAISITSLA	LRSESLRHIN	KVLAIVGATG
P38176	AVT5	YBL089W	385	406	VLAIVGATGSTSISFILPGLF	LAISITSLAK	GYKLIGSEFT
P38176	AVT5	YBL089W	433	454	LSLFIWGIAVMVASLSAIVFL	TSIKIFKYLS	GTSSH
P40074	AVT6	YER119C	7	28	GVLTLLHTACGAGILAMPYAF	MVASIRS	KPFGLIPGVI
P40074	AVT6	YER119C	32	53	LIPGVIMIVLCGACAMQSLFI	AMPYAFKPFG	QARVAKYVPQ
P40074	AVT6	YER119C	80	101	IVFDLAIAIKCFGVGVSYMIV	LTRLINPNLG	VGDLMPQIMS
P40074	AVT6	YER119C	125	146	ISLIMLFFVAPLSFLKKLNSL	NAWLLNRNVQ	RYASMVAISS
P40074	AVT6	YER119C	150	171	MVAISSVAYLCVLVLLHYVAP	KKLNSLRYAS	SDEILRLKGR
P40074	AVT6	YER119C	195	216	LNTLPIFVFAYTCHHNMFSII	LPPQSHDLNV	NEQRSSRFEH
P40074	AVT6	YER119C	229	250	IPLIAISLALILYIAIGCAGY	RSSRFEHVMK	LTFGDNIIGN
P40074	AVT6	YER119C	267	288	AVSSTIGRIAIVLLVMLAFPL	IGNIIMLYPQ	QCHPARASIH
P40074	AVT6	YER119C	357	378	FIVITCSILVASYLVAISVSS	PKETPLRGKS	LARVLAIVGA
P40074	AVT6	YER119C	381	402	VLAIVGATGSTSISFILPGLF	VAISVSSLAR	GYKLIGTEHK
P40074	AVT6	YER119C	424	445	TGLLLFIWGLIIMITCLTAAL	VPLTTKIFKY	KLN
P40501	AVT7	YIL088C	6	27	ALSSTANLVKTIVGAGTLAIP	MEATSS	YSFKSDGVLV
P40501	AVT7	YIL088C	34	55	VLVGVILTLLAAVTSGLGLFV	AIPYSFKSDG	LSKCSKTLIN
P40501	AVT7	YIL088C	84	105	IFDLAMIVQCFGVGLSYLVLI	CMLTYPTLAP	GDLFPGLFGG
P40501	AVT7	YIL088C	108	129	FPGLFGGERNYWIIASAVIII	LSYLVLIGDL	PLCLVKKLDQ
P40501	AVT7	YIL088C	143	164	SILGLFALAYISILVFSHFVF	VKKLDQLKYS	ELGKGELTNI
P40501	AVT7	YIL088C	190	211	LSTFSIIIFAFTGSMNLFPMI	WWKIHDFKGL	NELKDNSMEN
P40501	AVT7	YIL088C	221	242	ITFVINNSISLSTALFLIVGL	NELKDNSMEN	SGYLTFGNET
P40501	AVT7	YIL088C	264	285	IWIVIGKFCLGSMLILSFPLL	NLMLNYDPNS	FHPLRIAVNN
P40501	AVT7	YIL088C	397	418	ALLLISMYTLALSVQSFALVL	FVKSRFYWIT	SFVGATGSTS
P40501	AVT7	YIL088C	428	449	ISFTLPGLLGYKLIGLDSLAI	SFVGATGSTS	GKMIPPKDRF
P40501	AVT7	YIL088C	463	484	SLLLVFYGLSVMFLSLYVTVF	PPKDRFYKRC	NRSDEA
P38928	AXL2	YIL140W	508	529	CGVAIPLGVILVALICFLIFW	SHNKKAVAIA	RRRRENPDDE
P50080	AZR1	YGR224W	70	91	IALALSLFLAALDIMIVSTII	PKGFILYASL	EEVAKQFGSY
P50080	AZR1	YGR224W	102	123	EIGWLFTGYSLPNALLALIWG	EVAKQFGSYS	RIATPIGFKE
P50080	AZR1	YGR224W	134	155	MLFAIVIFEIGSLISALANSM	IATPIGFKET	SMLIGGRVIA
P50080	AZR1	YGR224W	163	184	IAGVGGCGIQSLSFVIGSTLV	SMSMLIGGRV	EESQRGILIA
P50080	AZR1	YGR224W	189	210	GILIAVLSCSFAIASVVGPFL	GSTLVEESQR	GGVFTSSVTW
P50080	AZR1	YGR224W	221	242	WCFYVNLPIGGLAFFLFLFFY	GVFTSSVTWR	NPGLSTFQET
P50080	AZR1	YGR224W	298	319	IIEFVFCSAGFTCILLAFTFG	PFMELIFMYD	GNRYAWNSAS
P50080	AZR1	YGR224W	329	350	IIILFIIGIVLVVLAGIYDFL	GNRYAWNSAS	VFPKFNIVKA
P50080	AZR1	YGR224W	375	396	PGIFTVNIALFLTCAGYISQF	PLMSWTNIKK	TYIVQYFQLI
P50080	AZR1	YGR224W	414	435	AVHLVACIISTVVTAILCGAI	LIYNDSAWRA	TDKTRQIKPI
P50080	AZR1	YGR224W	443	464	PIIVISSIFGVVGAGILTLLN	AITDKTRQIK	NNANNSAHIG
P50080	AZR1	YGR224W	472	493	IGLLILPGVAFGGLAQSSMLA	LNNNANNSAH	SQIQLDKKSP
P50080	AZR1	YGR224W	581	602	LTDVFYMALGFYALSLIFAVF	SKLGNIISES	ASNKKVTASL
P38084	BAP2	YBR068C	99	120	VVMMSLGTGIGTGLLVANAKG	KLKKSMKSRH	LHYGGPAALI
P38084	BAP2	YBR068C	123	144	GGPAALIIGYILVSFVTYFMI	LVANAKGLHY	QAAGEMAVTY
P38084	BAP2	YBR068C	173	194	GFATVWLYCFQWLTVLPLELI	YSSIFISKSF	TASMTIQFWN
P38084	BAP2	YBR068C	210	231	IYILIFYVFLVFIHFFGVKAY	QFWNDKINPD	GETEFIFNCC
P38084	BAP2	YBR068C	235	256	FIFNCCKILMIAGFIILSIVI	FGVKAYGETE	NCGGAGNDGY
P38084	BAP2	YBR068C	289	310	VCYILVTAYFSFGGMELFALS	GDTSIGRFKN	VQEQSNPRKS
P38084	BAP2	YBR068C	328	349	IYRIVVIYLLTMILIGFNVPY	KSTPVAAKRS	NDDQLMGAGG
P38084	BAP2	YBR068C	374	395	GVKIVPHIINAVILISVVSVA	SPYVLAASIH	NSSLYAGPRL
P38084	BAP2	YBR068C	427	448	PLRALIVCCVFGVIAFVAASS	FLDYVDREGR	KEEIVFTWLA
P38084	BAP2	YBR068C	451	472	IVFTWLAAIAGLSELFTWTSI	AFVAASSKEE	MLSHLRFRQA
P38084	BAP2	YBR068C	500	521	IWGSIYGVFFNILVFVAQFWV	DELGYKATTG	ALAPLGNGGK
P38084	BAP2	YBR068C	536	557	FFQNYLAFPIWLAFYFGYMVY	GNGGKCDAES	NRDFTLLNPL
P41815	BAP3	YDR046C	95	116	VMMSLGTGIGTGLLVANAKGL	LKKSMKSRHV	SLAGPGSLVI
P41815	BAP3	YDR046C	119	140	GPGSLVIGYVMVSFVTYFMVQ	VANAKGLSLA	AAGEMGVTYP
P41815	BAP3	YDR046C	169	190	FATTWLFCIQWLTVLPLELIT	NSIFISKSFG	SSMTVKYWND
P41815	BAP3	YDR046C	206	227	FIVIFYVFLLFIHFFGVKAYG	YWNDTINADV	ETEFIFNSCK
P41815	BAP3	YDR046C	238	259	LMVAGFIILSVVINCGGAGVD	TEFIFNSCKI	GYIGGKYWRD
P41815	BAP3	YDR046C	284	305	ICYILVSAYFSFGGIELFVLS	EGSGATRFKG	INEQSNPRKS
P41815	BAP3	YDR046C	323	344	VYRILIIYLLTMILIGFNVPH	KSTPVAAKRS	NNDQLMGSGG
P41815	BAP3	YDR046C	377	398	INAVILISVISVANSALYAAP	IHKVRVIPHI	RLMCSLAQQG
P41815	BAP3	YDR046C	423	444	LRALVVCSLVGVVGFVACSPQ	LNYIDREGRP	EEQAFTWLAA
P41815	BAP3	YDR046C	449	470	TWLAAIAGLSELFTWSGIMLS	ACSPQEEQAF	HIRFRKAMKV
P41815	BAP3	YDR046C	502	523	VFFNMLVFMAQFWVALSPIGN	NTGIWGSYYG	GGKCDAQAFF
P41815	BAP3	YDR046C	531	552	FFESYLAAPLWIFMYVGYMVY	GNGGKCDAQA	KRDFTFLNPL
P32839	BCS1	YDR375C	44	68	AMSNNPYFAAGGGLMILGTGLAVA	REKLSKLVGD	RSGIIKASRV
P22804	BET1	YIL004C	117	141	SGISIKTWLIIFFMVGVLFFWVWI	FGNMMEMARR	T
P38813	BIG1	YHR101C	275	296	GLLQLIFTILVGYILIQFFFT	FDSQLIENNR	KKTIVDEKIT
P53744	BIO5	YNR056C	49	70	LLGIAFSLSCSWVGISASMAV	KFDKHFNWWS	GIASGGPLLI
P53744	BIO5	YNR056C	77	98	LLIIYGLIIAAFFSLMCGISL	MAVGIASGGP	GDFAAILPNS
P53744	BIO5	YNR056C	160	181	VSSMVVGLLNYFGAIFTTASI	NVEVSSKFQK	CSSLSMSCIG
P53744	BIO5	YNR056C	204	225	WHVFVGYECINAVLTLFNIYS	LLHPDYELKH	TPLPYISQFG
P53744	BIO5	YNR056C	230	251	ISQFGLYTSLLSFAMTFIICI	FNIYSTPLPY	VSRSDNTVDP
P53744	BIO5	YNR056C	281	302	GMAFVVGLVNPIWAFVGIDSA	FDNQTGWNSS	THMIDEVGYS
P53744	BIO5	YNR056C	321	342	IITTIIVGFVTSFIYCVGLFF	SKSRFLVPKV	CITDQTAVVE
P53744	BIO5	YNR056C	369	390	LSVFLQCMCITTGFVSGIASG	IFYQATGNRN	TWQSRILQSF
P53744	BIO5	YNR056C	439	460	ICVTIIGCIFMGSSTAFNAII	SPLYAHFLSQ	TACITLLLMS
P53744	BIO5	YNR056C	461	482	ACITLLLMSYAVPSFIFLFVI	SSTAFNAIIT	KKEKFIHRIE
P53744	BIO5	YNR056C	507	528	MIPHIICILWTLFCLVFLSFP	VSRPNRRRMS	YTLPVTAGNM
P53744	BIO5	YNR056C	540	560	TSVVYAVVFCIISIVVFPTC	LPVTAGNMNY	I
P53838	BOR1	YNL275W	84	105	VIPSIVDTYFNNLLPAIAFAQ	SDWVDAFNYR	DMFDRTDNSY
P53838	BOR1	YNL275W	116	134	VNEVLLSSAMAGIVFGVL	MFDRTDNSYG	GGQPLCIVGV
P53838	BOR1	YNL275W	140	160	IVGVTGPISIFNYTVYEIIK	FGVLGGQPLC	PLNTSYFGFM
P53838	BOR1	YNL275W	165	186	YFGFMFWICMWSMIFHLVLAF	YEIIKPLNTS	TNAVCLLQYV
P53838	BOR1	YNL275W	192	213	LQYVTTFPCDIFGLFINVVYI	VLAFTNAVCL	QKGIQILTRQ
P53838	BOR1	YNL275W	235	256	GFASVVVALVMTAFGLFFKLF	AKSGEKSVQD	HYYPLFSHRI
P53838	BOR1	YNL275W	274	295	TALSVLFWSSFTHFGGYLHDV	RIRTFISDYS	KFKKLPITKA
P53838	BOR1	YNL275W	329	350	VFIALPFGIFLTILFYFDHNV	LAYEPIPVKD	SSLMAQRHQY
P53838	BOR1	YNL275W	373	394	LLGLTTCISGVLGIPAPNGLI	KPSSFHYDFA	PQAPLHTETL
P53838	BOR1	YNL275W	438	459	LVCLGEIPQAVLSGLFFIMGI	MILGTMTRPL	NGLMTNSIIQ
P53838	BOR1	YNL275W	495	516	LIFLSFSLTGFAGEFAITNTI	PLMKVSKKSM	AAIGFPLVLL
P53838	BOR1	YNL275W	518	539	IGFPLVLLLSVLVSFSFAYIF	EFAITNTIAA	PTEELKILDT
P25385	BOS1	YLR078C	222	240	LVFWIALILLIIGIYYVL	SINKRVFKDK	KWLR
P14772	BPT1	YLL015W	29	50	ISVISAWQAVFFLLIGSYQLW	SGTNALNPCF	KLYKNNKVPP
P14772	BPT1	YLL015W	84	105	FQSTLIICELALVSQSSDRVY	RHLTHLTNVC	PFILKKALYL
P14772	BPT1	YLL015W	110	127	KALYLNLLFNLGISLPT	SDRVYPFILK	QYLAYFKSTF
P14772	BPT1	YLL015W	139	160	GNQLFYYMFQILLQLFLILQR	LAYFKSTFSM	YYHGSSNERL
P14772	BPT1	YLL015W	178	199	MILEVLLLFNSVAIFIYDLCI	RLTVISGQTA	FEPINELSEY
	BPT1	YLL015W	213	235	GWYPPVHVLSYITFIWMNKLIV	NELSEYYKKN	ETYRNKKIKD
P14772	BPT1	YLL015W	283	304	IWKSFGRTISVAMLYETTSDL	WLNRNSLWRA	LSVVQPQFLR
P14772	BPT1	YLL015W	333	354	VFIALTLFVISVVSVFLTNQF	TSSKYPPLNG	YIGIFEAGLG
P14772	BPT1	YLL015W	410	431	AQTIIGAPIQIIVVLTSLYWL	VLRIQRFFEN	LGKAVIGGLV
P14772	BPT1	YLL015W	434	455	AVIGGLVTMAIMMPINAFLSR	LTSLYWLLGK	KVKKLSKTQM
P14772	BPT1	YLL015W	518	539	LIYFAWNCVPLMVTCSTFGLF	NFRKIGIVSN	SLFSDSPLSP
P14772	BPT1	YLL015W	560	581	ILNSAIYSVPSMINTIIETSV	IVFPSLSLFN	SMERLKSFLL
P14772	BPT1	YLL015W	972	993	KACGVLGVVLFFLFMILTRVF	VKTKIYLAYI	DLAENFWLKY
P14772	BPT1	YLL015W	1030	1052	SAAFNNLRSIMMLLYCSIRGSK	VGVYSLIGVA	KLHESMAKSV
P14772	BPT1	YLL015W	1095	1116	IFSFFFKSILTYLVTVILVGY	MDAVDSNLQY	NMPWFLVFNM
P14772	BPT1	YLL015W	1117	1138	MPWFLVFNMFLVVIYIYYQTF	LVTVILVGYN	YIVLSRELKR
P14772	BPT1	YLL015W	1209	1230	QTIGATIVLATAILALATMNT	STNRWLSVRL	KRQLSSGMVG
P14772	BPT1	YLL015W	1235	1256	SGMVGLLMSYSLEVTGSLTWI	ATMNTKRQLS	VRTTVTIETN
Q07660	BRE4	YDL231C	143	164	NGVSIFKFFIAYFIAIVICVI	IIHFPRDIRK	RPSGRWIGHE
Q07660	BRE4	YDL231C	176	194	YFLPIAVLIHHPVRNIGV	SGRWIGHEFR	QLEMTISSII
Q07660	BRE4	YDL231C	198	219	TISSIIGASFGLGWSALAWYI	VRNIGVQLEM	STATKPTANY
Q07660	BRE4	YDL231C	227	248	NYQGGILFQSLTMALLFAIWL	YISTATKPTA	RSVYRRFFYF
Q07660	BRE4	YDL231C	254	275	FFYFTTSFSISIIFTHTVRLA	AIWLRSVYRR	SSKFDLKWQI
Q07660	BRE4	YDL231C	284	305	IFWDFGISYLFGLLLSLLVCV	ASSKFDLKWQ	CVSPHSGNAE
Q07660	BRE4	YDL231C	706	727	ITFCMIFLCLPTWLPESYHWY	SGDECKWTLK	QEFHCWWAPL
Q07660	BRE4	YDL231C	750	771	WALVMRRLICGIVGIFWGWAA	LLAHRRYSGN	NQSRHFGSPY
Q07660	BRE4	YDL231C	780	801	YVVCTFAGLIVVPFSINFLVY	ANQSRHFGSP	RNTKSSFTAL
Q07660	BRE4	YDL231C	843	864	GLALIIGILVSIPINWIVWPF	AGIWKSTWVT	RARTELRDSM
P38770	BRL1	YHR036W	299	320	LFLNAITTVVIFSFILSFIIA	ASYALMSYLQ	LQKDLKSTWE
P38770	BRL1	YHR036W	407	428	FVIFCGVITWCFSSNFLLGFV	FIDPLNWKTL	RAKSYYGNGI
P53062	BRR6	YGL247W	53	74	FFNFIIGTIGLSLAIKFILMI	PSLIAEYIQL	RNDVNLKLEH
P53062	BRR6	YGL247W	160	181	FLFILISIIGIIFVTNTSFGS	AFFEAFSIRS	YRVYLNNKDT
Q05611	BSC2	YDR275W	67	88	FGIFQLMCSLGVIVLLLPIII	SEIRSGLMLM	LDAIDLFLYM
Q08280	BSC6	YOL137W	72	93	TVPLVKLQVIACLIMFVVFGM	KVKTYPLNYQ	NDQTVGALLP
Q08280	BSC6	YOL137W	144	165	GGMLLAAGLCIVFLIILATAP	ERLNKHFGMR	SSFYVCMFCG
Q08280	BSC6	YOL137W	167	188	FYVCMFCGLPLGLGIGILDST	LIILATAPSS	GNVLMGSLLV
Q08280	BSC6	YOL137W	205	226	IMHGLYGAAAMVTPPLVSYFV	LLVHKNELMG	EWGHWSLFFL
Q08280	BSC6	YOL137W	232	253	LFFLIPLFFSIIGMIVIFPAF	SYFVEWGHWS	KFETASKYDY
Q08280	BSC6	YOL137W	300	321	PAIFLYSLYLFLYLGAEITTG	SPGFFELLRN	SWFFSYLLET
Q08280	BSC6	YOL137W	340	361	YIAASFWTGLTVGRLCLGFVT	TKSSNKVAMS	ERFFENEYKA
Q08280	BSC6	YOL137W	373	394	AYAFLTLSSYTLFVLVGLINS	FFENEYKASK	SSVFYFVVLF
Q08280	BSC6	YOL137W	397	418	FYFVVLFFVVFCCGTFIGPLF	LVGLINSSSV	PNASIVALQV
Q08280	BSC6	YOL137W	439	460	VAVAVGGCGGAAIPYLAGVIA	PKRLHVSGVG	HTVGIQYIPL
Q08280	BSC6	YOL137W	462	483	VGIQYIPLLCWIMVALFTLEW	PYLAGVIAHT	TLYPKFIKGH
P38356	BSD2	YBR290W	178	199	LLWNIIVSTSFQFIGFLITYI	EGLPVGNIAN	LHTSHAAKQG
P38356	BSD2	YBR290W	211	232	FGLGLTFIGYGYSMIPNDVTS	TSHAAKQGSR	KVGKNKSLNR
P38356	BSD2	YBR290W	280	301	IPWLAVFVAFLGLFITLKSIY	NHGLDEEKQN	DYIQVKKLEK
P43571	BST1	YFL025C	56	77	FSILGILSICSLLLISLLKPF	IAKKPYTYRL	NGADAPQCES
P43571	BST1	YFL025C	707	728	LALASFPVAFIALVLSYQFYW	TLKMLFIRYR	YNKTSEFPSF
P43571	BST1	YFL025C	748	769	HGILMFFTLFLASPVVNNKLV	DSTLGYILRK	QRILYLLDPV
P43571	BST1	YFL025C	803	824	WFMSTIGILFGVMTVGLLALV	ANFYYLGIRD	SKIFGSLEIL
P43571	BST1	YFL025C	871	892	LLLLVFFHIPYQMAFVISLVI	GKGRLMASVL	QIATCIRVAL
P43571	BST1	YFL025C	919	940	TLLLLLLFVSAINIPIIIVFL	QKLNLLNYNM	HNVAIKWETS
P43571	BST1	YFL025C	956	977	ILAVAPIIFLVGNNSIFKMPN	WETSFRSHHN	SVPLDTWDGK
P43571	BST1	YFL025C	984	1005	DGKVTIILFVYLTVFSFIYGI	MPNSVPLDTW	RNLYWIHHLV
P43571	BST1	YFL025C	1007	1028	LYWIHHLVNIICAWLLFFETI	VFSFIYGIRN	H
P41698	BUD8	YLR353W	515	536	IIVILLCCSIVPPLFFIIGCS	GFRDVYSIEN	SRRKLVSDYR
P41698	BUD8	YLR353W	577	598	LILGAAETVIVMAGIAIGFGV	VDLRWFRMFC	GITRE
P53226	BUD9	YGR041W	460	481	VITTLCICLFVPPLFFFFSIN	GFSEIYSIPR	GNNGVSNYRL
P53226	BUD9	YGR041W	521	542	FVLGCIEMLAIFASIGIGFGV	IDVQWFRTLC	GIIRE
P48558	BXI1	YNL305C	53	74	VYSLLSCQLLASLSFCYWASV	PIIRQRFMHK	STSLQNFIMS
P48558	BXI1	YNL305C	85	106	IALFYICMVVSLVSCIWLAVS	TSLQNFIMSH	PRPEDYEASV
P48558	BXI1	YNL305C	146	167	LTLLSIFTLSEAYCLSLVTLA	WYVLSSYKQK	YDKDTVLSAL
P48558	BXI1	YNL305C	171	192	TVLSALLITTIVVVGVSLTAL	SLVTLAYDKD	SERFENVLNS
P48558	BXI1	YNL305C	208	229	WLNWGLWIMIGMGLTALLFGW	VLNSATSIYY	NTHSSKFNLL
P48558	BXI1	YNL305C	239	260	YGWLGAILFTAYLFIDTQLIF	NTHSSKFNLL	RKVYPDEEVR
P48558	BXI1	YNL305C	270	291	CAMMLYLDIVNLFLSILRILA	RKVYPDEEVR	NSNDDN
P04817	CAN1	YEL063C	92	113	IGMIALGGTIGTGLFIGLSTP	EVKRELKQRH	LTNAGPVGAL
P04817	CAN1	YEL063C	116	137	AGPVGALISYLFMGSLAYSVT	FIGLSTPLTN	QSLGEMATFI
P04817	CAN1	YEL063C	171	192	MYWFSWAITFALELSVVGQVI	SPAFGAANGY	QFWTYKVPLA
P04817	CAN1	YEL063C	198	219	VPLAAWISIFWVIITIMNLFP	GQVIQFWTYK	VKYYGEFEFW
P04817	CAN1	YEL063C	234	255	VLAIIGFLIYCFCMVCGAGVT	EFEFWVASIK	GPVGFRYWRN
P04817	CAN1	YEL063C	282	303	FLGWVSSLINAAFTFQGTELV	IISKDKNEGR	GITAGEAANP
P04817	CAN1	YEL063C	323	344	VVFRILTFYIGSLLFIGLLVP	RKSVPRAIKK	YNDPKLTQST
P04817	CAN1	YEL063C	376	397	IFNAVILTTIISAANSNIYVG	ENSGTKVLPH	SRILFGLSKN
P04817	CAN1	YEL063C	419	440	GGVPYIAVFVTAAFGALAYME	APKFLSRTTK	TSTGGDKVFE
P04817	CAN1	YEL063C	448	469	FEWLLNITGVAGFFAWLFISI	METSTGGDKV	SHIRFMQALK
P04817	CAN1	YEL063C	497	518	LAYYAATFMTIIIIIQGFTAF	LPFKAKLMPG	APKFNGVSFA
P04817	CAN1	YEL063C	523	544	GVSFAAAYISIFLFLAVWILF	GFTAFAPKFN	QCIFRCRFIW
P53223	CAX4	YGR036C	34	55	AYFSLMPILVLAFYLSWFIIT	DSHDFLSFLS	RELEACIVAF
P53223	CAX4	YGR036C	131	152	FLEKCIFSGALALLSFCVCFS	KIYTSWKNLN	RVYLHYHNLD
P53223	CAX4	YGR036C	164	185	IVGFSVGALTGSLYFFIVGII	YLHYHNLDQV	RELGLINWFL
P21560	CBP3	YPL215W	151	169	TFSQWFQITVLHEWILFV	YFYEDLKLPR	RMRAMPFKYG
P37267	CBP4	YGR174C	4	27	LWVRWLKVYAIGGAIIGSGFLLF	MERP	KYTTPTDQQL
P38626	CBR1	YIL043C	6	27	KLVVVIVIVVVPLLFKFIIGP	MAIDAQ	KTKPVLDPKR
P47818	CCC1	YLR220W	99	120	VISDLIIGLSDGLTVPFALTA	LGFFQSVDPR	GLSSLGDAKL
P47818	CCC1	YLR220W	129	150	LVITGGFAELISGAISMGLGG	AGLSSLGDAK	YLGAKSESDY
P47818	CCC1	YLR220W	236	257	VTIGGGYLLGGLVPLVPYFFV	PAENRELISA	SDVGTGLIYS
P47818	CCC1	YLR220W	259	280	VGTGLIYSIIVMVVTLFWFGY	PLVPYFFVSD	VKTKLSMGSG
P47818	CCC1	YLR220W	300	321	VEMVVVGGVAAGAAWFFVKLL	SSTSKKVTEG	G
P38995	CCC2	YDR270W	262	283	LLAIICMLLYMIVPMMWPTIV	FWKKNSIKST	QDRIFPYKET
P38995	CCC2	YDR270W	303	324	ILGVILASYIQFSVGFYFYKA	SFVRGLFYRD	AWASLKHGSG
P38995	CCC2	YDR270W	335	356	MDTLVCVSTTCAYTFSVFSLV	WASLKHGSGT	HNMFHPSSTG
P38995	CCC2	YDR270W	370	391	IVFDTSIMIISYISIGKYLET	HPSSTGKLPR	LAKSQTSTAL
P38995	CCC2	YDR270W	528	549	IFVPGILILAVLTFFIWCFIL	IQGYADYLAS	NISANPPVAF
P38995	CCC2	YDR270W	577	598	VVIVACPCALGLATPTAIMVG	FFICLQTATS	TGVGAQNGVL
P38995	CCC2	YDR270W	901	924	LFWALCYNIFMIPIAMGVLIPWG	LKTFKRIKLN	ITLPPMLAGL
P38995	CCC2	YDR270W	927	950	PPMLAGLAMAFSSVSVVLSSLML	GVLIPWGITL	KKWTPPDIES
P50077	CCH1	YGR217W	345	366	YSLLYNTLLTFYAILLAIRTY	KIARFLLHRR	NPHNVVFLYR
P50077	CCH1	YGR217W	383	404	FIFILSACFTGNDIAKIIAFG	LYRFSNWTDY	FWDDSEMFKA
P50077	CCH1	YGR217W	562	583	MLVYFWIFFGILGVQIFQGSF	GIPQLVNVSS	RRQCVWFNPE
P50077	CCH1	YGR217W	657	678	IVNSMELVFVIMSANTFTDLM	PYNGRISFDN	YYTMDSDEMA
P50077	CCH1	YGR217W	690	711	LFFIVCIFVLTIWLLNLLIAV	TMDSDEMAAC	LVSSFEIANE
P50077	CCH1	YGR217W	765	786	LAIYSHVEFIFVILIICDIGM	TKFPNWSQKG	RASVKVSTSA
P50077	CCH1	YGR217W	808	829	ISIVLFIESLARLVLYLPNMW	NNILLKTDRG	KFLTKPSYVY
P50077	CCH1	YGR217W	840	861	FIISIITLVISCLAVEGVLGH	FLTKPSYVYD	MYAWLSIFHI
P50077	CCH1	YGR217W	903	924	FYFFFTFLVAIIMAVYFEGVI	NGVMIWNLSS	PPEEMADQPF
P50077	CCH1	YGR217W	941	962	SFLSLFIIGSTENWTDILYAL	QPFGMYSLPN	QKHSPNISST
P50077	CCH1	YGR217W	977	998	FFIIWFLLSNSVILNIFIALI	NISSTFFCSV	SESMEVKEEE
P50077	CCH1	YGR217W	1206	1227	VFVFIFALATILLIVCSCYVT	RSYFHHIERD	PLYRMHHKMG
P50077	CCH1	YGR217W	1246	1267	CAFIGAFSIEFIVKTVADGFI	GTWNWSSALD	YSPNAYLRNP
P50077	CCH1	YGR217W	1276	1297	PWNFIDFCVLISMWINLIAYL	IYSPNAYLRN	KNNGNLSRIF
P50077	CCH1	YGR217W	1339	1360	IFEAGLISLSLLFPFTVWGLS	NLVMFDGLNK	IFKGRLGTCN
P50077	CCH1	YGR217W	1407	1428	FASAFSSLYQIISLEGWVDLL	YQQPYLHLDS	ENMMNSSGIG
P50077	CCH1	YGR217W	1451	1472	FLVLFNFLSMVFILNLFVSFI	TVMGSAGNAL	VNNQARTTGS
P50077	CCH1	YGR217W	1528	1549	NFYYASFLQVVLYLHIIMLLS	FFYQLAVEKK	RSYNPGNLIG
P50077	CCH1	YGR217W	1553	1574	PGNLIGYQGVYFMFSTSVFLI	IIMLLSRSYN	QEALHMCGEG
P50077	CCH1	YGR217W	1595	1616	IRLSIIIIAFIMNAVAFHVPA	RLYFRQKWNS	SHYWFHNIKG
P50077	CCH1	YGR217W	1617	1638	HYWFHNIKGFFLLVIFLFIIP	NAVAFHVPAS	QNDTLTELLE
P50077	CCH1	YGR217W	1653	1674	LPPILSLTYTWGVLFLVYAIA	TELLETAMAS	LNQIFGLTRL
P50077	CCH1	YGR217W	1747	1768	LMSWNIISMYIFVNMFVSLII	CGSETYAYLL	GNFSYVYRSG
P40986	CDC1	YDR182W	39	60	LRIYWRYISIVWILWLGLISY	KKSKSRSKKR	YESVVVKRAM
P40986	CDC1	YDR182W	391	412	IRMYLWGLLFSAAFIAYMHFF	LCYMPDPYKA	PKSFNNRVAT
P40986	CDC1	YDR182W	465	486	IKQFLVNAIVLFVSVMPIFIY	SKYAVNDTRS	FYTVV
P04821	CDC25	YLR310C	1451	1473	DVACVPFFGVYLSDLTFTFVGN	KYRELLRSVT	PDFLHNSTNI
P25656	CDC50	YCR094W	44	65	VLPLLIFVACIFTPIGIGLIV	AWQPILSPQS	SATKVQDLTI
P25656	CDC50	YCR094W	331	352	LGVLYLIVAGLCALFGIIFLV	NGAIGGRNMS	KLIFQPRAMG
P38221	CDS1	YBR029C	70	91	VMISGFFITLASGHAWCIVLI	NFFIRTVWTF	LGCQIATFKE
P38221	CDS1	YBR029C	153	174	FIVTNHKFICYCLYLMGFVLF	ATFYEYPVLN	VCSLRKGFLK
P38221	CDS1	YBR029C	187	208	GSLCVTHMVLLLVVFQAHLII	LRKGFLKFQF	KNVLNGLFWF
P38221	CDS1	YBR029C	213	234	GLFWFLLPCGLVIVNDIFAYL	AHLIIKNVLN	CGITFGKTKL
P38221	CDS1	YBR029C	254	275	GFLGAWFFTALASIILTRILS	IEISPKKTLE	PYTYLTCPVE
P38221	CDS1	YBR029C	329	350	FHALNLATFASLFAPFGGFFA	INSITVKPIY	SGLKRTFKVK
P08456	CHO1	YER026C	81	102	MADYITMLNGFSGFYSIVSCL	HHFSMMRNLH	RFTLTGKPHY
P08456	CHO1	YER026C	162	183	IAFAIGFQTTFDVMILSFFVL	LVSFGVAPAA	CGLARLARFN
P08456	CHO1	YER026C	209	230	YFEGLPMPTTLALVLGMAYCV	PKDSSTGKSK	RKGLIFDNIP
P08456	CHO1	YER026C	247	268	QILEFHPIILVFFIHGCGMIS	NIPFGIFRED	KSLKIPKP
P05374	CHO2	YGR157W	55	76	LLEKCIALAIISNFFICYWVF	SLFDPTLKKS	QRFGLQFTKY
P05374	CHO2	YGR157W	86	107	FFLVQYLFWRIAYNLGIGLVL	QRFGLQFTKY	HYQSHYETLT
P05374	CHO2	YGR157W	187	208	FVDLILMQDFVTYIIYVYLSI	EINVWLIFRQ	PYSWVQIFNW
P05374	CHO2	YGR157W	212	233	VQIFNWRSLLGVILILFNIWV	YVYLSIPYSW	KLDAHRVVKD
P05374	CHO2	YGR157W	258	279	LIFDGVFNISPHPMYSIGYLG	GDFFFLEESE	YYGLSLICND
P05374	CHO2	YGR157W	291	310	VLLVSVFGHYSQFLFLKYV	GLSLICNDYK	ENPHIERTYG
P05374	CHO2	YGR157W	362	383	FTDYFTIGTVAALMLGTIMNA	LSFNNFNKLR	RFINLNYLFI
P05374	CHO2	YGR157W	389	410	YLFITVFVTKLVSWLFISTIL	IMNARFINLN	YKQSQSKWFT
P05374	CHO2	YGR157W	439	460	IYNYYLVLTYTLMIIHTGLQI	QVYSYEQWQF	WSNFSNINNS
P05374	CHO2	YGR157W	463	484	FSNINNSQLIFGLILVALQTW	IHTGLQIWSN	CDKETRLAIS
P05374	CHO2	YGR157W	534	555	VWGTVLMTNFAVTNIILAVLW	HPEAVLGVVG	TLTNFILVKF
P08004	CHS1	YNL192W	794	815	FFYLFFNTLISWFSLSSFFLV	IGRKLLLTVE	FRILTVSIAL
P08004	CHS1	YNL192W	832	853	VLSVIFLWLYGICTLSTFILS	IALAYHSAFN	LGNKPKSTEK
P08004	CHS1	YNL192W	865	886	VLTCVIFAVMMIYMIFCSIFM	NKPKSTEKFY	SVKSFQNILK
P08004	CHS1	YNL192W	913	934	IVISLGSTYCLYLISSIIYLQ	GLITTEAFRD	PWHMLTSFIQ
P08004	CHS1	YNL192W	941	962	FIQYILLSPSYINVLNIYAFC	YLQPWHMLTS	NVHDLSWGTK
P08004	CHS1	YNL192W	1041	1062	LVIIFWVITNFIIVAVVLETG	KTGYYANVRS	GIADYIAMKS
P08004	CHS1	YNL192W	1100	1121	ILWLVALSALIRFIGCSIYMI	TSKASIYFNV	VRFFKKVTFR
P14180	CHS2	YBR038W	643	664	FIQMLFSWFSIANFVLTFYYL	FFLHVEFLYQ	AGSMNLVIKH
P14180	CHS2	YBR038W	677	698	LFIFFKYLIFCDLASLFIISM	MNLVIKHGEA	GNRPQGAKHL
P14180	CHS2	YBR038W	711	732	SMVILSICATYSLICGFVFAF	PQGAKHLFIT	KSLASGTESH
P14180	CHS2	YBR038W	743	764	IFVDIVISLLSTYGLYFFSSL	SLASGTESHK	MYLDPWHMFT
P14180	CHS2	YBR038W	775	796	SIQYFLTLPAFTCTLQIFAFC	YLDPWHMFTS	NTHDVSWGTK
P14180	CHS2	YBR038W	875	896	IVMIWMLSNLILIMSIIQVFT	NDYYRDIRTR	PQDTDNGYLI
P14180	CHS2	YBR038W	905	926	IFILWSVAALAAFRVVGSMAF	TPQDTDNGYL	LFMKYLRIIV
P29465	CHS3	YBR023C	170	191	MYCYFITFWAPAPILAFCGMP	ETNDTLSFWQ	KKERQMAWRE
P29465	CHS3	YBR023C	202	223	VALISVILYIGAIVAFLTFGF	KERQMAWREK	TKTVCSSSKL
P29465	CHS3	YBR023C	452	473	VVLYVSLVFILSVVIIKFIIA	SKTVGCIASD	CYFRWTVARK
P29465	CHS3	YBR023C	1006	1027	LVLIRDLCGTFCFSMQFVIGI	INSTVHNLFE	ELIGTMVLPL
P29465	CHS3	YBR023C	1029	1050	IGTMVLPLAICFTIYVIIFAI	SMQFVIGIEL	VSKPTPVITL
P29465	CHS3	YBR023C	1055	1076	PVITLVLLAIILGLPGLIVVI	IIFAIVSKPT	TATRWSYLWW
P29465	CHS3	YBR023C	1080	1101	WSYLWWMCVYICALPIWNFVL	GLIVVITATR	PSYAYWKFDD
P38843	CHS7	YHR142W	61	82	VIFDVGNAFINIGALGVILII	YARSIDLANT	LYNIRQKYTA
P38843	CHS7	YHR142W	98	119	LYFFQLTLLLIIFTLVVDCGV	KYTAIGRSEY	SPPGSGSYPY
P38843	CHS7	YHR142W	129	150	FVAIQIGLAGACCWALLIIGF	SPPGSGSYPY	LGFNLWEDGT
P38843	CHS7	YHR142W	169	190	TSMLGFIANFLASILTFKAWI	TTKSMLLVRG	TDHKVATMNA
P38843	CHS7	YHR142W	199	220	ASGMIVVVYIINAIFLFVFVI	ITDHKVATMN	CQLLVSLLVV
P38843	CHS7	YHR142W	232	253	LWVTGAIFLGLFFFVAGQVLV	LLVSLLVVRN	YAFSTQICEG
P38843	CHS7	YHR142W	265	286	HYLDGLFFGSICNVFTLMMVY	FSTQICEGFK	KTWDMTTDDD
P27825	CNE1	YAL058W	481	502	FVLTAAVVLLTTSVLCCVVFT	IDRILEQPLK
P40452	COA1	YIL157C	73	94	IAGFLLFSVAIGSALSLIFNY	PDPTTERRKR	EKTESPIISN
Q3E7B2	COA3	YJL062W-A	26	49	FFKGNMLGLTLLLGVTGSVYYYT	TPAMIRARKP	YHFLHKDNDF
P32378	COQ2	YNR041C	91	112	PVGTWLLYLPCSWSILMGAMM	PYAELMRLEK	QGATLSATAG
P32378	COQ2	YNR041C	113	134	GATLSATAGMLGIFGVGALVM	WSILMGAMMQ	RGAGCTINDF
P32378	COQ2	YNR041C	170	191	ALVFLGAQTLVGMGVLSLLPA	IASGRVSPRR	QCWWLGLASL
P32378	COQ2	YNR041C	192	213	CWWLGLASLPIVFTYPLFKRF	MGVLSLLPAQ	TYYPQAALSA
P32378	COQ2	YNR041C	228	249	ALLGFPAMGVMSWPTMIPLYL	AALSACFNWG	SSYLWCMTYD
P32378	COQ2	YNR041C	297	318	IALLAVAGLNSGLLWGPGFIG	SIMKAMSASQ	GLGVFAYRLF
P32378	COQ2	YNR041C	351	372	TGLYFTYALAVDYILRLFGFL	CWKYFNANIN
P53822	COS1	YNL336W	42	63	IYKSLAFRIWMLLWLPLSVWW	RSSFTWFCYE	KLSNNCIYPL
P53822	COS1	YNL336W	72	93	LIVSLLVLFLGPIFVLVICGL	WKLSNNCIYP	SRKRSLSKQL
P53822	COS1	YNL336W	231	252	RISNIFMLIPFLNFLCCIYVS	YRFKLTWFLK	RGMCLLLRTF
P53822	COS1	YNL336W	254	275	MCLLLRTFYLGWILFMLVQGF	FLCCIYVSRG	QNMRMIVLSV
P52924	COS10	YNR075W	36	59	IRNSGFWIWSLSWLPLAVWWGMA	RNRLTWLCSE	STWFYPLLTS
P52924	COS10	YNR075W	62	85	FYPLLTSVVLILALIAILPVVQI	AVWWGMASTW	QYSKYTLSNQ
P53053	COS12	YGL263W	70	91	VIVTALMFEVLYFLWTYSYIF	WKIRGKRHYL	RERTLGKQVS
P53053	COS12	YGL263W	231	252	IMNSRFAFFSIAYLNGLLTIP	KLLWAFKEVT	RLRNSLHILY
P53053	COS12	YGL263W	257	278	LHILYVCAVLSSMIIEYLIGI	LLTIPRLRNS	DKFRFKSMNL
	COS2	YBR302C	45	63	SLAFRIWMLLWLPLSVWW	FTWFCYEIYK	KLSNNCIYPL
P0CX12	COS2	YBR302C	72	93	LIVSLLVLFLGPIFVLVICGL	WKLSNNCIYP	SRKRSLSKQL
P0CX12	COS2	YBR302C	254	275	MCLLLRTLYLGWILFMLVQGF	FLCCIYVSRG	QNIRVLIMSM
	COS3	YML132W	45	63	SLAFRIWMLLWLPLSVWW	FTWFCYEIYK	KLSNNCIYPL
P0CX13	COS3	YML132W	72	93	LIVSLLVLFLGPIFVLVICGL	WKLSNNCIYP	SRKRSLSKQL
P0CX13	COS3	YML132W	254	275	MCLLLRTLYLGWILFMLVQGF	FLCCIYVSRG	QNIRVLIMSM
P43542	COS4	YFL062W	42	63	IYKSLAFRIWMLLWLPLSVWW	RSSFTWFCYE	KLSNNWIYPL
P43542	COS4	YFL062W	69	90	IYPLMVSLLVLFWGPVFVLVI	SVWWKLSNNW	FRLSRKRSLS
P43542	COS4	YFL062W	232	253	ISNIFMLIPFLNFLCCIYVSR	RFKLTWFLKR	GMCLLLRTLY
P43542	COS4	YFL062W	254	275	MCLLLRTLYLGWILFMLVQGF	FLCCIYVSRG	QNIRVLIMSM
P47187	COS5	YJR161C	42	63	IYKSLAFPIWMLLWLPLSVWW	RSSFTWFCYE	KLSNNCIYPL
P47187	COS5	YJR161C	72	93	LIVSLLVLFLGPIFVLVICGL	WKLSNNCIYP	SRKRSLSKQL
P47187	COS5	YJR161C	232	253	IFTIYSLPLWLAFLNCICVSQ	RSKLTWFLKR	HFCLAFRILC
P47187	COS5	YJR161C	254	275	FCLAFRILCPGLFFLMMVWLF	FLNCICVSQH	QNMRTTALLV
P53344	COS6	YGR295C	42	63	IYKSLVFRIWMLLWLPLSVWW	RSSFTWFCYE	KLSNNWIYPL
P53344	COS6	YGR295C	69	90	IYPLMVSLLVLFWGPVFVLVI	SVWWKLSNNW	FRLSRKRSLS
	COS6	YGR295C	232	251	IFNRRCLPLFLFYLHNVFI	RFKLTWVLKR	SRNDGTIARP
	COS6	YGR295C	255	270	GTIARPLFLVVLFFI	LHNVFISRND	MTRDFRNMRM
Q07788	COS7	YDL248W	42	63	IYKSLAFRIWMLLWLPLSVWW	RSSFTWFCYE	KLSNNCIYPL
Q07788	COS7	YDL248W	72	93	LIVSLLVLFLGPIFVLVICGL	WKLSNNCIYP	SRKRSLSKQL
Q07788	COS7	YDL248W	232	253	IFTIYSLPLWLAFLNCICVSQ	RSKLTWFLKR	HFCLAFRILC
Q07788	COS7	YDL248W	254	275	FCLAFRILCPGLFFLMMVWLF	FLNCICVSQH	QNMRTTALLV
P38723	COS8	YHL048W	42	63	IYKSLAFRIWMLLWLPLSVWW	RNELTWFCYE	KLSSNWIHPL
P38723	COS8	YHL048W	72	93	LIVSLLVLFLGPFFVLVICGL	WKLSSNWIHP	SRKRSLSKQL
P38723	COS8	YHL048W	237	258	CLPLFLYYFLIVYTSGNADLI	WILKRIFNLR	SRFLFPVVMF
P36034	COS9	YKL219W	74	95	TWLLLLLLMWLPGFLSQIKSI	YEFFKCFTFR	NRIFPFKLCI
P36034	COS9	YKL219W	97	118	IFPFKLCILVSCLVGIFLPNI	FLSQIKSINR	YSFSHKSVLT
P36034	COS9	YKL219W	260	281	IFNLWLFPAFILFLACIYVSW	RYKFTWVLKR	DKGHLFRILC
	COS9	YKL219W	285	303	LFRILCCGGGFLLMVRVF	CIYVSWDKGH	QNMRPFSMHM
P32798	COT1	YOR316C	9	27	IISLLLLDTVFFGIEITT	MKLGSKQVK	GYLSHSLALI
P32798	COT1	YOR316C	42	60	MLNDIISLVVALWAVNVA	SLALIADSFH	KNRNPDSTYT
P32798	COT1	YOR316C	77	100	ILGALINAVFLIALCVSILIEAL	TYTYGWKRAE	QRIIAPPVIE
P32798	COT1	YOR316C	113	133	FVLYVGVAGLISNTVGLFLF	IAPPVIENPK	HDNDQEHGHG
P32798	COT1	YOR316C	243	265	VFLHVLGDALGNIGVMLSAFFI	KRKRSLNMHG	WKTDYSWKYY
P32798	COT1	YOR316C	278	295	LVSLIITGIIFSSALPL	DYSWKYYTDP	SCKASKILLQ
P21592	COX10	YPL172C	140	165	LKKKVIMPYLQLTKPRLTILVMLSA	AISEGLNMKT	ICSYALSPYP
P21592	COX10	YPL172C	179	198	ELLCLTVGTTLCSGSANAI	ALSPYPASVN	NMGREPEFDR
P21592	COX10	YPL172C	220	239	GDVTPTQAFEFAALIGTLG	VRTQARPVVR	VSILYFGVNP
P21592	COX10	YPL172C	249	268	TVAILGASNIALYGWAYTS	VSILYFGVNP	MKRKHIINTW
	COX10	YPL172C	273	296	IINTWLGALVGMVPPLMGWAAAS	WAYTSMKRKH	PLSHPGSWCL
P21592	COX10	YPL172C	337	356	AWKNPLLNARVSLRYSILM	EYKNAGYVMT	FPLCFGLSYF
P21592	COX10	YPL172C	368	386	TDWYYQIDSGLINAWLTF	LCFGLSYFNI	WAFKFYWQQR
P21592	COX10	YPL172C	428	453	VLHLPAILILAIIHKKGRWDWIYPG	IYARKTFMAS	EAKRPQERF
P19516	COX11	YPL132W	84	105	VAFYFSSVAVLFLGLAYAAVP	ARERKFKDRT	LYRAICARTG
P39103	COX14	YML129C	16	38	LTVLTLVGGTLYMSGGLAYTLY	YTRVTDTLHR	MNGKKYEQQV
P40086	COX15	YER141W	85	106	VAYWLIGTSGLVFGIVVLGGL	IESRLKTSKN	TRLTESGLSI
P40086	COX15	YER141W	170	191	LWGRAIGAVFILPAVYFAVSK	FIFFMEWIHR	KTSGHVNKRL
P40086	COX15	YER141W	200	221	LFGLAGLLGLQGFVGWWMVKS	KKTSGHVNKR	GLDQEQLDAR
P40086	COX15	YER141W	243	264	THLGTAFFLYMGMLWTGLEIL	KPTVSQYRLT	RECKWIKNPV
P40086	COX15	YER141W	293	314	ISLALLAVSFLTAMSGGMVAG	DNPAIGPMRK	LDAGWVYNTW
	COX15	YER141W	364	387	QLVHRTCAYVAFTSVLAAHMYAI	RNLLENPVTV	KKKAVIPRNA
P40086	COX15	YER141W	402	423	VMMGVVTLQATLGILTILYLV	IPRNAMTSLH	PISLASIHQA
P40086	COX15	YER141W	424	445	ISLASIHQAGALALLTSSLVF	GILTILYLVP	ASQLRKPRAP
P47081	COX16	YJL003W	32	53	PFLFFGLPFCATIVLGSFWLS	GRYKKALSKH	SFTAIKYEQG
P53239	COX18	YGR062C	163	184	WKNALLPMVQIPLWVTVSMGI	KLFKKYNVPL	RTLTETQLIE
P53239	COX18	YGR062C	213	234	PLVAMPLLAPILVGTLAVLNV	LGFSSFDLSS	ELNGRLMFSS
P53239	COX18	YGR062C	274	295	GCVVMLAMSSQAPFLLSLYWI	MTSILNVSRL	SSQLFSLVQN
Q04935	COX20	YDR231C	90	109	AGMLGFSSMFLMGSIIFIY	KLTSIPCFRD	HKSPTKATNW
Q04935	COX20	YDR231C	115	132	ATNWAMSSLILGSIVGW	IFIYHKSPTK	EQCRLKRQKS
P10174	COX7	YMR256C	30	51	YPFYAIFAVAVVTPLLYIPNA	WRHPRSALYL	IRGIKAKKA
P07255	COX9	YDL067C	15	34	MDIVLGFSLGGVMASYWWW	ITGTIKRRVI	GFHMDKINKR
P34237	COY1	YKL179C	614	635	VFLFYCIGLHGLVFMMSMYVI	VILQNKMTRM	NISGYMTPEV
P25334	CPR4	YCR069W	285	303	ISRALMCLTVLGLCFIAY	GTTAYDLNHP	KGMHEKPHTV
P27614	CPS1	YJL172W	19	40	AFISGIVALIIIGTFFLTSGL	PRKSLWQRHR	HPAPPHEAKR
P17898	CPT1	YNL130C	40	61	IFPLWMAPNLVTLLGFCFIIF	LRPFWRKFAT	NVLTTLYYDP
	CPT1	YNL130C	134	157	MTGMGYTYMTIFSQFAILCSFYL	TTLSMIPVCS	STWEEYHTHK
P17898	CPT1	YNL130C	172	193	FCGPVEGIIVLCISFIAVGIY	YHTHKLYLAE	GPQTIWHTKV
P17898	CPT1	YNL130C	210	231	FVFDVETVHLMYAFCTGALIF	TKVAQFSWQD	NIVTAHTNVV
P17898	CPT1	YNL130C	263	284	AVNGLLPFFAYFSSIFTLVLI	PSKTAENISK	QPSFISLALI
P17898	CPT1	YNL130C	285	306	PSFISLALILSIGFSVAFVVG	SSIFTLVLIQ	RMIIAHLTMQ
P17898	CPT1	YNL130C	320	341	VNFPFLIPTIQLVLYAFMVYV	AHLTMQPFPM	LDYQKGSIVS
P17898	CPT1	YNL130C	348	369	IVSALVWMGLGLTLAIHGMFI	VYVLDYQKGS	NDIIYDITTF
Q12289	CRC1	YOR100C	32	49	RENIKSFVAGGVGGVCA	SRPPIKSNPV	VFTGHPFDLI
Q12289	CRC1	YOR100C	106	123	LGVTPIFAVSFWGYDVG	GFYKGVIPPL	KKLVTFNNKQ
Q12289	CRC1	YOR100C	140	162	MGQMAAAGFISAIPTTLVTAPT	NKQGGSNELT	ERVKVVLQTS
Q12289	CRC1	YOR100C	195	212	GSLATLARDGPGSALYF	KEGGIASLFK	ASYEISKNYL
Q12289	CRC1	YOR100C	243	260	LAGGIAGMSMWLAVFPI	DEPVNILNVC	DTIKTKLQAS
Q12289	CRC1	YOR100C	292	313	FFPGLGPALLRSFPANAATFL	IYLQRGGIKG	GVEMTHSLFK
Q07560	CRD1	YDL142C	82	103	PFIGLFIITNNLTPALGLFAF	ILTLSRIGCT	SSITDFMDGY
Q07560	CRD1	YDL142C	154	175	VSIAAIILGRDVLLAISALFI	SVPSGPQIIP	RYSTLKLKYP
Q07560	CRD1	YDL142C	208	229	LSKWNTFFQMVYLGSGVLLLL	YPSAEVRPSQ	YEKEEGCEKT
	CRD1	YDL142C	254	274	SYLGYVTATTTIMSGVSYAL	DRKQDFQKAF	KRNAFKLLK*
Q06538	CSC1	YLR241W	34	55	TQLTIATSLGIFALLSFSILL	FRKPTAKVVT	KKWPRLYASR
Q06538	CSC1	YLR241W	116	139	IKLLSIFCFFSVCVISPVRYHFT	YVFLSFFKMC	GKIDDGNDDD
Q06538	CSC1	YLR241W	181	202	LWMYVLFTYFFTFIAIKMAVA	HSAPERTNVY	ETKHVVSTRQ
Q06538	CSC1	YLR241W	440	461	VFIGLSSLFLVIPVSYLATLL	DRLTKVYSTT	NLKTLSKFWP
Q06538	CSC1	YLR241W	485	506	IVTGLLPTYLFTLLNFGIPYF	LLKDHQWAAN	YEYLTSYQGL
Q06538	CSC1	YLR241W	530	551	FFYIFVNLFLVFTLAGTASNY	EEEISLVSKN	WAYLSDTTKI
Q06538	CSC1	YLR241W	578	599	LIILQGIGMFPFKLLLVGSLI	VKEFSLFYVD	GFPLVKIKAK
Q06538	CSC1	YLR241W	621	642	IFNFGLQLPQPILILIITLIY	RQRNELYNPP	SVMSTKILTS
Q06538	CSC1	YLR241W	648	669	ILTSGLAYFIIGFYVYKYQLI	TLIYSVMSTK	FATDHLPHST
Q06538	CSC1	YLR241W	681	702	VWPLIFRRIIVGLLLFQLTMT	TDHLPHSTGK	GTLAGFEGGW
Q06538	CSC1	YLR241W	709	730	GGWVLSSCLFPLPVVTLCFLY	TMTGTLAGFE	DFEKNYLPLS
Q12150	CSF1	YLR087C	17	38	FSWVFLVDWILTVVVCLTMIF	RGVPLTHQKD	YMGRIYAYLV
P35206	CSG2	YBR036C	50	71	SSLTFYLTFMYFASWLLLVPA	PETNGDNGNS	SRLWEKMRPM
P35206	CSG2	YBR036C	141	161	LTVLALIMIVADLTYNMALS	SVATFKYVAK	LSPAFDVALM
P35206	CSG2	YBR036C	167	187	VALMQNTAIFEIVTLLYGVC	MALSLSPAFD	GISRKNYVFR
P35206	CSG2	YBR036C	197	217	NFLIMMNAVIGILIISYTKA	GISRKNYVFR	TCDMLAGKLS
P35206	CSG2	YBR036C	245	265	GALICGLGALIMGPFAVLWN	SDPFLFDRLK	RWFCSNISKN
P35206	CSG2	YBR036C	285	305	STHMALIGIIGMVILLPFIP	ENSAVVLVKQ	KFPSRESVES
P35206	CSG2	YBR036C	324	344	FWFSLLGSIIFGSLPSLISI	SISLFYNDKS	LELNRKAPAE
P35206	CSG2	YBR036C	355	374	LTTCNLGAIIFMGLAEWVC	ELNRKAPAEY	EPTQTTIVRW
P35206	CSG2	YBR036C	385	404	VIGYIMLTVSLLVLSVTLG	PTQTTIVRWE	EGKYHH
P38287	CSH1	YBR161W	6	27	ILIIANIALLISIIHYTFDLL	MKKELK	TLCIDDTSKD
	CSH1	YBR161W	200	220	YIPYMTIMGSTGPLFISVVW	KSLKHYKKNW	KQYKRWSNTA
P38287	CSH1	YBR161W	273	294	ILSCVVTGFIFGFFILYGEFT	ANFMKTLENH	FYTWLCSGPF
Q08955	CSM4	YPL200W	130	151	FVIAELNSLIIVFFISLVFLW	LSDEVCSHLK	VSIEV
P38226	CST26	YBR042C	12	33	VVVPGISLLIFFQGCLILLFL	HQKIAHKVRK	QLTYKTLYCR
P38226	CST26	YBR042C	57	78	LFIVLVSSILHVVAPSAVRIT	KQIGLNKTKR	TENSSVPKGT
P38226	CST26	YBR042C	117	138	WIFLWWLAYTSNLGANVFIIL	AICNHQIYTD	KKSLASIPIL
P38226	CST26	YBR042C	376	397	VLILPTLTIIWLVYKLYCFIF	FKINRIELTE
P38152	CTP1	YBR291C	15	36	FLAGSLAGAAEACITYPFEFA	TKSDVDPLHS	KTRLQLIDKA
P38152	CTP1	YBR291C	65	86	IGSIYVGCPAFIIGNTAKAGI	LIYKTAKTQG	RFLGFDTIKD
P38152	CTP1	YBR291C	112	133	IAGLGAGLLESVAAVTPFEAI	TGELSGTRGV	KTALIDDKQS
P38152	CTP1	YBR291C	173	193	GVLPVSMRQAANQAVRLGCY	RDKGFSGLYR	NKIKTLIQDY
P38152	CTP1	YBR291C	214	235	GLTFLVGAFSGIVTVYSTMPL	DSPKDKPLSS	DTVKTRMQSL
P38152	CTP1	YBR291C	271	291	GATPRLGRLVLSGGIVFTIY	KEEGLKTFWK	EKVLVMLA
P49573	CTR1	YPR124W	152	173	AFGIFLLFVVAAFVYKLLLFV	HHLHANNSGK	SWCLEVHWFK
P49573	CTR1	YPR124W	250	271	IIYMLMLATMSFVLTYVFAVI	RAFLVFTSTM	TGLALSEVFF
P38865	CTR2	YHR175W	81	102	LPGLILSCLAIFGLAYLYEYL	VVFEWWHIKT	KYCVHKRQLS
P38865	CTR2	YHR175W	142	163	FSFMLMLVFMTYNGWLMLAVV	NSILYGLQVG	CGAIWGNYSW
Q06686	CTR3	YLR411W	41	62	GKFAGSCIGCFALVVVAQWLT	IARSWRNDTK	RFSRQFDVEL
Q06686	CTR3	YLR411W	159	180	LYPTFLDHMIRVTIFVLQWGL	SCCTLITPVD	SYIIMLLFMY
Q06686	CTR3	YLR411W	182	203	IIMLLFMYYNGYIIISCLIGA	IFVLQWGLSY	IVGRFIFCYE
P38428	CUE1	YMR264W	6	23	LITLILVFGVIFLKKFF	MEDSRL	QSNQHPSAQR
P53008	CWH41	YGL027C	10	28	TFWILTSIVLLASATVDI	MLISKSKMFK	SKLQEFEEYQ
	CWH43	YCR017C	8	31	IPIAHTICAFSAFFAALVTGYSL	MLIINGKI	HFHKIVTNAH
P25618	CWH43	YCR017C	64	85	IFQILIALTAFPRFLLLLGHY	TIGDRYPERS	YLNQSKVCFL
P25618	CWH43	YCR017C	91	112	VCFLVGVLRTVSCGGWVYITS	LGHYYLNQSK	TDDHDIHDIF
P25618	CWH43	YCR017C	117	138	IHDIFMITYIVLTLPWDIMIT	VYITSTDDHD	RYSSPLTSKN
P25618	CWH43	YCR017C	149	170	GLTATIFFGTLFPMIYWYIQH	YSSPLTSKNK	SVQQRAGAYS
P25618	CWH43	YCR017C	175	196	AGAYSIYAYFEWSLILLDIAF	WYIQHSVQQR	DAFAYADFKK
P25618	CWH43	YCR017C	278	299	GFLFWSNVTSLLCSIWHFPLW	FFYLLTNIFN	YMGISGYEAA
P25618	CWH43	YCR017C	307	328	AAILGYLGPIFLYLPFVSEAF	LWYMGISGYE	TQYGVLLGGI
P25618	CWH43	YCR017C	330	351	YGVLLGGIIAIGAYIVQMPEL	LPFVSEAFTQ	RLISVAVGTS
P25618	CWH43	YCR017C	352	368	LISVAVGTSITVATFV	AYIVQMPELR	QNLRYITNAE
P25618	CWH43	YCR017C	380	401	FSFALTWLLGLVASVILKMGF	LRYITNAETS	YTNNPTWVIL
P25618	CWH43	YCR017C	420	441	TALVLTVLFGMLSPYVNSINF	LDERNGGYNK	EGKRNAQAKS
P25618	CWH43	YCR017C	450	471	SASLIGKLFLAVGFGSLLFGI	FEGKRNAQAK	HQLLTDSSTT
P25618	CWH43	YCR017C	495	516	LPWPWGALTCTVMLFASLSSV	WEGYNESHGP	KFMGKPLVPC
P25618	CWH43	YCR017C	517	538	FMGKPLVPCLLLLISTAVLSA	MLFASLSSVK	RSITQWPKYI
P25618	CWH43	YCR017C	547	568	IFGGLLYAIAMLWLVPSYFSA	ARSITQWPKY	LGQVQNIWVY
P25618	CWH43	YCR017C	585	606	IIFVLAHVWVVAYAFVPMGWV	WVYVLSFSVY	LREKIETVLA
P25618	CWH43	YCR017C	613	634	VLAFSSTFIIIGALTCKNLNI	GWVLREKIET	QLVTMGKKFF
P25618	CWH43	YCR017C	642	663	FFIYVFFFAVALLSLTARFVY	NIQLVTMGKK	DIRPTGIPQP
P40312	CYB5	YNL111C	97	118	GSGTLVVILAILMLGVAYYLL	KVSTSENQSK	NE
P07143	CYT1	YOR065W	272	287	TVIILSSLYLLSIWV	HDERKRLGLK	KKFKWAGIKT
Q04895	DAL4	YIR028W	144	165	WWQCWLTVWIGYTFAGIFVVL	AGTGLQLGLN	NSRFGSAYHL
Q04895	DAL4	YIR028W	174	195	LSFPITVRASFGIFFSMWPII	LNSRFGSAYH	NRVVMAIVWY
Q04895	DAL4	YIR028W	198	219	VMAIVWYAVQAWLGATPVALM	FSMWPIINRV	LKSIFGKNLE
Q04895	DAL4	YIR028W	243	264	FEFMCFFIFWVVSIPFVLVAP	NHFGSPNSTT	HKIRHLFTVK
Q04895	DAL4	YIR028W	269	290	LFTVKAALIPFAAFGFLIWAL	VLVAPHKIRH	KKSHGKIELG
Q04895	DAL4	YIR028W	311	332	FSWIFVRSLMACVANFAALII	LNDYSPHGSE	NAPDFGRFAK
Q04895	DAL4	YIR028W	351	372	LVAIPLFFAITCLIGIIVTAA	KNPQASLWPQ	GYHLYGVNYW
Q04895	DAL4	YIR028W	401	422	AGVFLISFVFALAQLGTNISA	LETTYTRGTR	NSLACGADMT
Q04895	DAL4	YIR028W	443	464	GSLFCVAMALCICPWNLMASS	LFPRYINIRR	SKFTSALGAY
Q04895	DAL4	YIR028W	466	487	FTSALGAYAIFLSSIAGVICA	PWNLMASSSK	DYFVVRRGYV
Q04895	DAL4	YIR028W	522	543	AFVAYICGIAPNLPGFIGDVG	FGNKFGANWR	APKITVSEGA
Q04895	DAL4	YIR028W	560	581	YPVGFFISAVIYLILCYFFPV	EGAMRLYYLG	PGTPVTNFLT
P15365	DAL5	YJR152W	80	97	IDYCMFPLMCILYAVQF	PEEDRKLRWK	MDKISTSSAA
P15365	DAL5	YJR152W	123	145	WVTSAFYFGYLFMNLGPVQFIF	DLKMHGDQYS	QRTSHMSKML
P15365	DAL5	YJR152W	154	171	LAVFIVIWGMLLALHAA	FQRTSHMSKM	PTVKYPSFIV
P15365	DAL5	YJR152W	178	200	FIVLRVLLGCAESVVTPCFTII	HAAPTVKYPS	TAQYWKTEEQ
P15365	DAL5	YJR152W	213	237	VSIWFGMNGLGSILINAIAYGVYI	YWKTEEQFTR	HQDSYAIKGW
P15365	DAL5	YJR152W	248	269	TLFVITGVITIFIGILIFLWI	QDSYAIKGWR	PDDPSKARFL
P15365	DAL5	YJR152W	317	342	WLYFLFTVSSNIPNGGISSFMSILL	IIEALKDVRT	NSDFGYSSKE
P15365	DAL5	YJR152W	352	377	TLLMGLPTGAVELVGCPLFGILAVY	NSDFGYSSKE	AANKKIPFWK
P15365	DAL5	YJR152W	389	411	LSWAIFAAVLALIASCMLGFAT	NKKIPFWKYK	NSKKARLAGA
P15365	DAL5	YJR152W	417	435	LAGAYLWYISPVSFICVL	GFATNSKKAR	SNISANSSGY
P15365	DAL5	YJR152W	453	472	INLVAYAAANLAGPQTFIA	GYSKKWTVSS	KQAPKYHGAK
P15365	DAL5	YJR152W	482	504	VAMVVCYAVMIVLLSILLIVNL	KQAPKYHGAK	RENKRRDKIA
P18962	DAP2	YHR028C	29	45	VGIILVLLIWGTVLLL	KKHLLDKLIR	KSIPHHSNTP
	DCV1	YFR012W	14	37	QLISFSGFMICCLTSPIIRNWGL	KLILLFSSFL	AQAAGVSYGT
P43595	DCV1	YFR012W	90	107	IGGLLISIPVATCLTFI	WWLSPKARHT	SFALPLVIIF
P43595	DCV1	YFR012W	136	155	ILTLLSTIFACTVILLLCM	SLITSNAILH	HRDPVTISSL
P43595	DCV1	YFR012W	167	189	LVWLANCSLFPLLVIGVHFLSF	DPVTISSLYD	RFDTSAQSDR
P38307	DER1	YBR201W	4	25	ILNLLGDIPLVTRLWTIGCLV	MDAV	LSGLTSLRIV
P38307	DER1	YBR201W	55	76	LLYSIFDYGAFNWISMINIFV	LVFKKGQYGR	SANHLSTLEN
P38307	DER1	YBR201W	93	114	FCWIIFLLLVILVKMTSIEQP	LENSFNLRRK	AASLGVLLHE
P38307	DER1	YBR201W	142	163	FGAIDVSPSIFPIYMNAVMYF	KNGNQMNVRF	VYKRSWLEIA
P40526	DFG10	YIL049W	17	38	LSFFVGICSLFIAKSCLPEFL	LLKYTIYAYR	QYGKTYRPKE
P40526	DFG10	YIL049W	77	98	FLSLVTLYFYPKFPIVWIIFG	YFSHFYYLAT	HSLRRLYETL
P40526	DFG10	YIL049W	122	143	HYLVGIWFYSVLLLILNISLY	YTSNSRMNWS	KNSIPNTLNM
P40526	DFG10	YIL049W	199	220	IIYSTLLPYEQEFYLTLVWVI	VCCPHYLDEI	TSLTISALET
Q99234	DFG16	YOR030W	1	22	IIRLHFYYLLTLVYHLGLVGA	M	YEKAARKRIQ
Q99234	DFG16	YOR030W	167	188	ITFASGCICVATWMLFLVVLL	KDPFPLGMIM	LPSDNHNRRN
Q99234	DFG16	YOR030W	203	224	YVLFSAIIRTVFLNETIAVIF	HNRRNKVVHV	DSQYHDDYQD
Q99234	DFG16	YOR030W	291	312	IIITVGCFLSLADNILFANLL	IPFKMKKGTH	WRKNLVVLKV
Q99234	DFG16	YOR030W	321	342	VFYKLIELLIYTIFISIICYF	LWRKNLVVLK	TWHNFAYILL
Q99234	DFG16	YOR030W	378	399	IPLLAYNILIFILFYFTTIFF	RILWENYHET	AAFTKHVRGW
Q99234	DFG16	YOR030W	410	431	FNFVHLLKVLITVNVWGLIGV	AFTKHVRGWT	LEKRELHISK
Q12743	DFM1	YDR411C	41	62	IVMTIVGRLNLINPWYFIYVW	PITRTLFTLA	NLTFKKVQIW
Q12743	DFM1	YDR411C	122	143	YAYYLCFCILAITTATTIIYG	NRRGPMVTVD	SYYPVVLTSG
Q12743	DFM1	YDR411C	170	191	IMFYGLIPVWGKYFPLIQLFI	TWSIDNANVQ	SFVFNEGDFV
Q12743	DFM1	YDR411C	192	213	FVFNEGDFVISLIGFTTGYLY	YFPLIQLFIS	TCLDTHTLGP
Q08650	DGA1	YOR245C	71	92	VLFSIFTLFAISTPALWVLAI	LAVAWHTSSF	PYMIYFFFDR
Q08650	DGA1	YOR245C	186	207	TYLFGYHPHGIGALGAFGAFA	DYRNQECTGP	TEGCNYSKIF
Q08650	DGA1	YOR245C	215	236	IFPGIPISLMTLVTQFHIPLY	FATEGCNYSK	RDYLLALGIS
Q08650	DGA1	YOR245C	289	310	GFIKLAIQTGNINLVPVFAFG	GTQLILNKRK	EVDCYNVLST
Q12382	DGK1	YOR311C	77	95	VFHSSIGFITLYLYTQGI	FITKHEIPRK	NYKNVLWPLI
Q12382	DGK1	YOR311C	103	124	LIYAFIILFILDLIRLNWPFF	GINYKNVLWP	NMLYCRTVGA
Q12382	DGK1	YOR311C	140	161	IHTYNGVLWYILGLIFSFNFF	TVGALMRKKE	SKDVTLISLF
Q12382	DGK1	YOR311C	163	184	DVTLISLFLLSWSDTAAATIG	LIFSFNFFSK	RKYGHLTPKV
Q12382	DGK1	YOR311C	203	224	IAAFTVGVITCWVFYGYFVPA	VARNKSLAGS	YSYVNKPGEI
Q12382	DGK1	YOR311C	244	265	LNMLSLLGGVVAALSEGIDLF	QWSPETSRLS	NWDDNFTIPV
Q06143	DIC1	YLR348C	16	37	WWYGGAAGIFATMVTHPLDLA	ESAGKNIKYP	KVRLQAAPMP
Q06143	DIC1	YLR348C	57	76	ILANEGVVGLYSGLSAAVL	KPTLFRMLES	RQCTYTTVRF
Q06143	DIC1	YLR348C	104	126	MAYLLPCSMFSGAIGGLAGNFA	NVIPREQLTN	DVVNIRMQND
Q06143	DIC1	YLR348C	169	189	GWKPNMVRGILMTASQVVTY	YEGGLKTLFT	DVFKNYLVTK
Q06143	DIC1	YLR348C	210	231	LTASLLAGLVATTVCSPADVM	DFDASKNYTH	KTRIMNGSGD
Q06143	DIC1	YLR348C	264	283	WLPSFTRLGPFTMLIFFAI	KEGPSFMFRG	EQLKKHRVGM
P50076	DIE2	YGR227W	35	56	VITGIFCNVVIYPLLLIYFVL	PGIARNLTQE	TFRYMTTNIV
P50076	DIE2	YGR227W	94	115	ITTPPGIYILGLINYYCIKPI	KGKWTQWDPK	FKSWSTLTIL
P50076	DIE2	YGR227W	127	148	VNLLGGIIVFPILVLRPIFLF	SWSTLTILRL	NALGFWPVSL
P50076	DIE2	YGR227W	150	171	LGFWPVSLMSFPLMTTYYYLF	VLRPIFLFNA	YTDVWSTILI
P50076	DIE2	YGR227W	187	208	VLTLPFGPVKSIWLSAFFAGV	TILILQSLSC	SCLFRQTNII
P50076	DIE2	YGR227W	213	234	QTNIIWTGFIMILAVERPAIL	FFAGVSCLFR	QKQFNTHTFN
P50076	DIE2	YGR227W	256	277	FSNLVLPYMINFVLFFIYLIW	LKLFIHAIDD	NRSITLGDKS
P50076	DIE2	YGR227W	294	315	IVQIFYCFTFITVFSLPIWIS	DKSSHSAGLH	RNFMKLYKLR
P50076	DIE2	YGR227W	333	354	FFEFIGIMLIIRYFTKVHPFL	LRIKRKPVQT	LADNRHYTFY
P50076	DIE2	YGR227W	375	396	LIKYFFMTPIYHFSTFAYLEV	FRRLIGNKSR	MRPNQLTFHP
P50076	DIE2	YGR227W	423	444	HVSWTALITCTMVTIVPSPLF	EPVHLPIQLT	EPRYYILPYF
P50076	DIE2	YGR227W	447	468	YYILPYFFWRIFITCSCEPLI	IVPSPLFEPR	KDLKPAKEGE
P50076	DIE2	YGR227W	492	513	FLWFMLFNVVTLVIFSKVSFP	ISSTKRLFME	WTTEPYLQRI
P53388	DIP5	YPL265W	90	111	ISMIAIGGSLGTGLLIGTGTA	RLRKDLKARH	LLTGGPVAML
P53388	DIP5	YPL265W	119	142	MLIAYAFVGLLVFYTMACLGEMA	TALLTGGPVA	SYIPLDGFTS
P53388	DIP5	YPL265W	156	177	YVDPALGFAIGYTYLFKYFIL	LDGFTSYASR	PPNQLTAAAL
P53388	DIP5	YPL265W	201	222	VWITIFLVVIVAINVVGVKFF	WISRDRVNPG	GEFEFWLSSF
P53388	DIP5	YPL265W	231	252	FKVMVMLGLILLLFIIMLGGG	FGEFEFWLSS	PNHDRLGFRY
P53388	DIP5	YPL265W	285	306	FVAVFVYSLFSYTGIELTGIV	ITGGKGKFVS	CSEAENPRKS
P53388	DIP5	YPL265W	322	343	LTVYRIIVFYLCTVFLLGMCV	PRKSVPKAIK	AYNDPRLLST
P53388	DIP5	YPL265W	372	393	GIEVLPHIFNACVLVFVFSAC	SPFVVAIQNS	NSDLYVSSRN
P53388	DIP5	YPL265W	423	444	GVPYNALILSVLFCGLAYMNV	PKIFAKTSRW	SSGSAKIFNY
P53388	DIP5	YPL265W	454	475	FVNVVSMFGILSWITILIVYI	SSGSAKIFNY	YFDKACRAQG
P53388	DIP5	YPL265W	501	522	AYFALFFCILIALIKNFTVFL	AYVAPGQRYG	GHKFDYKTFI
P53388	DIP5	YPL265W	530	551	FITGYIGLPVYIISWAGYKLI	FLGHKFDYKT	YKTKVIKSTD
Q04216	DLT1	YMR126C	15	36	LFVSLILLIGFSVVLPIDSIA	KLKSWLYKAS	QASKSENNAF
Q04216	DLT1	YMR126C	47	68	TFIVVGALVVFGVFCIFIIIG	ASKSENNAFN	RMLFHKSCLK
P32660	DNF1	YER166W	214	235	FHNFANVYFLVLIILGAFQIF	TFLPKNILFQ	GVTNPGLSAV
P32660	DNF1	YER166W	239	260	PGLSAVPLVVIVIITAIKDAI	GAFQIFGVTN	EDSRRTVLDL
P32660	DNF1	YER166W	553	574	VINFVLLFILCFVSGIANGVY	RISRELNFSV	YDKKGRSRFS
P32660	DNF1	YER166W	594	615	ATNGFVSFWVAVILYQSLVPI	YEFGTIAGSA	SLYISVEIIK
P32660	DNF1	YER166W	1188	1209	PEFFYKNMIFALALFWYGIYN	WSYKRLAEMI	DFDGSYLYEY
P32660	DNF1	YER166W	1219	1240	TYMMFYNLAFTSLPVIFLGIL	DFDGSYLYEY	DQDVNDTISL
P32660	DNF1	YER166W	1270	1291	LWYMLDGLYQSIICFFFPYLV	LRKEWNQRKF	YHKNMIVTSN
P32660	DNF1	YER166W	1307	1328	RYFVGVYVTTIAVISCNTYVL	VTSNGLGLDH	LHQYRWDWFS
P32660	DNF1	YER166W	1334	1355	DWFSGLFIALSCLVVFAWTGI	TYVLLHQYRW	WSSAIASREF
P32660	DNF1	YER166W	1375	1396	PSFWAVFFVAVLFCLLPRFTY	FKAAARIYGA	DSFQKFFYPT
Q12675	DNF2	YDR093W	252	273	FHNFANIYFLILLILGAFQIF	TFFPKNILFQ	GVTNPGFASV
Q12675	DNF2	YDR093W	277	298	PGFASVPLIVIVIITAIKDGI	GAFQIFGVTN	EDSRRTVLDL
Q12675	DNF2	YDR093W	598	619	ILNFVLLFILCFTAGIVNGVY	RISRELNFSV	YKQKPRSRDY
Q12675	DNF2	YDR093W	639	660	STNGFVSFWVAVILYQSLVPI	FEFGTIGGSA	SLYISVEIIK
Q12675	DNF2	YDR093W	1231	1252	PQFFYKNVIFTLSLFWYGIYN	WCYKRLAEMI	NFDGSYLFEY
Q12675	DNF2	YDR093W	1262	1283	TYLTFYNLAFTSVPVILLAVL	NFDGSYLFEY	DQDVSDTVSM
Q12675	DNF2	YDR093W	1313	1334	LWYMLDGVYQSVICFFFPYLA	LRKEWNQTKF	YHKNMVVTEN
Q12675	DNF2	YDR093W	1350	1371	RYFVGVFVTAIAVTSCNFYVF	VTENGLGLDH	MEQYRWDWFC
Q12675	DNF2	YDR093W	1377	1398	DWFCGLFICLSLAVFYGWTGI	FYVFMEQYRW	WTSSSSSNEF
Q12675	DNF2	YDR093W	1418	1439	PAYWAVLFVGVLFCLLPRFTI	YKGAARVFAQ	DCIRKIFYPK
Q12674	DNF3	YMR162C	164	185	LANTYFFIVAVLQMIPGWSTT	PRQLYAQFSK	GTYTTIIPLC
Q12674	DNF3	YMR162C	451	472	INMIIVFMVFVVATISLFSYL	RTKAPKLQRK	GHVLHKKKYI
Q12674	DNF3	YMR162C	495	516	GVAPTIMSFIIMYNTVIPLSL	KAWYLFQADA	YVTMEIIKVV
Q12674	DNF3	YMR162C	1157	1178	VDSGNIAHCVVVIDGATMAMF	ISKMNAVSQE	EGNPTYMSVF
Q12674	DNF3	YMR162C	1318	1339	WSLSMFNTLFTSLPVLCIGMF	MFSGSSLYEP	EKDLKPMTLL
Q12674	DNF3	YMR162C	1365	1386	WLIFMEWVILATTNSLIITFL	SYGRLSQGFN	NVVMWGMSSL
Q12674	DNF3	YMR162C	1395	1416	LSDNTMYPLGLINFTAIVALI	LNVVMWGMSS	NVKSQFVEMH
Q12674	DNF3	YMR162C	1432	1453	FTSVVLSCGGWLVWCCALPIL	VEMHNRNWLA	NNTDQIYDVA
Q12674	DNF3	YMR162C	1473	1494	ITFWCTSLVLALLPITLDIVY	YGFYNHFGKD	KTFKVMIWPS
P14020	DPM1	YPR183W	238	259	FGANNLILFITFWSILFFYVC	QQLKELYVFK	YQLYHLVF
Q05521	DPP1	YDR284C	21	42	VFLLIIMILLNYPVYYQQPFE	NIGAKWRLED	RQFYINDLTI
Q05521	DPP1	YDR284C	65	86	MLFVYSFVVPSLTILIIGSIL	YATTERVNNN	ADRRHLIFIL
Q05521	DPP1	YDR284C	92	113	IFILYTSLLGLSLAWFSTSFF	GSILADRRHL	TNFIKNWIGR
Q05521	DPP1	YDR284C	172	193	SFAGLGYLYFWLCGQLLTESP	RTTPSGHSSE	LMPLWRKMVA
Q05521	DPP1	YDR284C	193	214	LMPLWRKMVAFLPLLGAALIA	LCGQLLTESP	LSRTQDYRHH
Q05521	DPP1	YDR284C	222	243	HHFVDVILGSMLGYIMAHFFY	IALSRTQDYR	RRIFPPIDDP
P39524	DRS2	YAL026C	221	242	FSKYANLFFLCTSAIQQVPHV	TFLPKFLFQE	SPTNRYTTIG
P39524	DRS2	YAL026C	246	267	RYTTIGTLLVVLIVSAMKECI	QQVPHVSPTN	EDIKRANSDK
	DRS2	YAL026C	409	427	TAWIFGLVIFTGHETKLL	MILRGATLRN	RNATATPIKR
P39524	DRS2	YAL026C	449	470	ALFTVLIVLILISSIGNVIMS	VEKIINRQII	TADAKHLSYL
P39524	DRS2	YAL026C	490	511	FFKDFLTFWILFSNLVPISLF	YLEGTNKAGL	VTVELIKYYQ
P39524	DRS2	YAL026C	1012	1033	LYSFYKNTALYMTQFWYVFAN	WSYQRISVAI	AFSGQSIMES
P39524	DRS2	YAL026C	1043	1064	WTMSFYNLFFTVWPPFVIGVF	AFSGQSIMES	DQFVSSRLLE
P39524	DRS2	YAL026C	1094	1115	WGWIINGFFHSAIVFIGTILI	KGQFFSVYIF	YRYGFALNMH
P39524	DRS2	YAL026C	1131	1152	WSWGVTVYTTSVIIVLGKAAL	LNMHGELADH	VTNQWTKFTL
P39524	DRS2	YAL026C	1161	1182	LIAIPGSLLFWLIFFPIYASI	LVTNQWTKFT	FPHANISREY
P39524	DRS2	YAL026C	1202	1223	GVFWLTLIVLPIFALVRDFLW	YGVVKHTYGS	KYYKRMYEPE
P38125	DTR1	YBR180W	110	131	IIFGIIIFIGFLGPMSGNIYI	YTYFSKDQRL	PALPLLQREY
P38125	DTR1	YBR180W	149	170	ATVSVFMAVFSVGPLFWGALA	EYDVSATTIN	DFGGRKFLYM
P38125	DTR1	YBR180W	184	205	LMLIVNILLAAVPVNIAALFV	RKFLYMVSLS	LRIFQAFASS
P38125	DTR1	YBR180W	207	228	IFQAFASSSVISLGAGTVTDV	VNIAALFVLR	VPPKHRGKAI
P38125	DTR1	YBR180W	240	261	FMMGPNMGPIIAPIVAGLILM	PKHRGKAIAY	KGNYWRWLFG
P38125	DTR1	YBR180W	267	288	WLFGFTSIMTGIALILVTALL	LILMKGNYWR	PETLRCIVGN
P38125	DTR1	YBR180W	366	387	PIIITSVSTALLFSSYYAFSV	TLYWKMIKCP	TFSYYLEHDY
P38125	DTR1	YBR180W	398	419	FTMLEIGAAYVCPGVAMLLGS	FSYYLEHDYR	QSGGHLSDYL
P38125	DTR1	YBR180W	446	469	RLLLNLIGILLTICGTIGYGWAI	HPKKKFPAEF	FFHYHFVVLL
P38125	DTR1	YBR180W	472	493	YHFVVLLVFSALTAFGMTWCS	IGYGWAIFFH	NTSMTYLTEL
P38125	DTR1	YBR180W	520	541	VGAAISSAIILQLCNAMGIGW	TVAVSSFFRN	CFTGLGLCSS
P38125	DTR1	YBR180W	542	563	FTGLGLCSSISLIGILYLLIF	LCNAMGIGWC	QRKYTAKEF
P33413	DUR3	YHL016C	14	35	AIVLGLGAVFAGMMVLTTYLL	KPPLPQGAGY	KRYQKEIITA
	DUR3	YHL016C	53	76	SVKTGLVAAAVVSSWIWCSTLLT	TAEEFTTAGR	SSTKEYADGI
P33413	DUR3	YHL016C	85	106	IFGGYAYAAGACFQIIAFAIL	TSSTKEYADG	AIKTKQMAPN
P33413	DUR3	YHL016C	130	151	IGHGCYLFYAIATNILVTSML	LELVRTRYGK	LTSGSAVFSD
P33413	DUR3	YHL016C	166	187	TIASCFLLPVGVVVYTLFGGI	AVFSDLTGMN	KATFLTDYMH
P33413	DUR3	YHL016C	189	210	TFLTDYMHTCVIIIIVLVFAF	VYTLFGGIKA	KVYATSDVLG
P33413	DUR3	YHL016C	253	274	AGILLIINLIGNFGTVFLDNG	GEYMTMTSKS	YWNKAISASP
P33413	DUR3	YHL016C	295	316	LAWFAVPSLISLTMGLACLAV	ASLKAYAIGG	ETSPNFPTYP
P33413	DUR3	YHL016C	343	364	AIAIMGKGGAVASLLMIFMAV	ANSGLVLPAA	TSAMSAELIA
P33413	DUR3	YHL016C	403	424	ACIFFGLAMSGFSVGLYYGGI	GKKLIYTSHV	SMGYIYEMMG
P33413	DUR3	YHL016C	425	446	MGYIYEMMGIIISSAVLPVVL	SVGLYYGGIS	TLCSKDMNLV
P33413	DUR3	YHL016C	454	475	LVAAVVSPILGTGLAIMSWLV	VLTLCSKDMN	CTKSLYKELT
P33413	DUR3	YHL016C	496	517	TGNLVALLSPAIFIPILTYVF	DTTFMDYPML	KPQNFDWEKM
P33413	DUR3	YHL016C	618	639	IAYFLCVFFALAFLVVWPMPM	EQRELARGLK	YGSKYIFSKK
P33413	DUR3	YHL016C	650	671	FTGWVVVMIIWLFFSAFAVCI	GSKYIFSKKF	YPLWEGRHGI
Q03212	EAR1	YMR171C	45	66	IMLFAFGTLIVVYIVICIVYF	GDDTDELNMD	FTKQIATRLI
O13529	ECM12	YHR021W-A	16	37	LLVFYFHIKQQAIMPFFIFFF	FLIKYIYIHV	SSFDGLSFDL
O13529	ECM12	YHR021W-A	50	71	AFLAKHVFVGVCSPFFVVGFF	DGLSFDLRVV	GSSRVVVTEW
Q06011	ECM19	YLR390W	34	57	NTLDMVTIGIACLVGVYTGTRFF	KRQVQCNMRK	EPIVIDRLRK
P47144	ECM27	YJR106W	20	41	VTFIVPSLFHIIIAFVLLGIC	RLLYKDPKLS	ASDFLCPNVA
P47144	ECM27	YJR106W	118	139	VLGACGIILCIVEGSIFIIMS	STSVSLSIGE	RTHIEISQIQ
P47144	ECM27	YJR106W	156	177	LLFSLAAMCVMSYVSLMNQVT	QIQKLSIMRD	VLNCLLMAFL
P47144	ECM27	YJR106W	177	198	VLNCLLMAFLYAFYLVVKLTF	SYVSLMNQVT	KLNHSAETPD
P47144	ECM27	YJR106W	396	417	ISDAIFSIITVPFFIIFKLSC	PHLSNFSQKS	PQPPSDILSY
P47144	ECM27	YJR106W	438	459	LPIILLFIQSITAPFLLCSIL	PTLNRYSLTT	SVLLTYHLGY
P47144	ECM27	YJR106W	469	490	LVYLFPLILAMALILLLTAFI	SVLLTYHLGY	TKVNLHNKFT
P47144	ECM27	YJR106W	525	546	IQIIFLAIGIINIIIWISLLA	RKLLERLNTS	NSLIEMMEIY
P47144	ECM27	YJR106W	558	579	ILGLSKAILGLTIFAWGNSVG	LIEMMEIYQK	DLISNISMCR
P47144	ECM27	YJR106W	620	641	LNSMGGIGFSGLVSMLFIGAF	SCASCLGGVM	NDNEWWFLRK
P47144	ECM27	YJR106W	667	688	FIVSCVFIILQIILLLLFFGG	SQLDNTLNYK	PNNIKRRLTK
P47144	ECM27	YJR106W	703	724	GISMCGLWALATLINILLELF	RRLTKEMKLV	S
Q99252	ECM3	YOR092W	9	30	IWASVRPIIKIYLIIGVGFGL	MTHITLGQA	CKMNILTVQA
Q99252	ECM3	YOR092W	73	94	GIICLTSVILFATGLGFAFIV	NIEDNDIKDV	RSVLPVPKRW
Q99252	ECM3	YOR092W	105	126	GGILAGGMFPNISDLPIAYLQ	SVLPVPKRWR	SMDQGFIFTE
Q99252	ECM3	YOR092W	142	163	VANVIIFLAMFLICVFNLGGF	IFTEAEGEKG	RLIENDFHYK
Q99252	ECM3	YOR092W	431	452	MAVILALIIAFIPWVKALFVT	FLKNCLRPCS	TSNTPKIKQA
Q99252	ECM3	YOR092W	470	491	FIMDFTSYVGAASVPFGLILL	QAPDNAPALT	GATLGRLKIG
Q99252	ECM3	YOR092W	545	566	MLLFVTAITWNLPTMTTLIYF	AGWLNWENDK	TASYTPEDET
Q99252	ECM3	YOR092W	586	607	FLMLQYPLMVVSLPFLVSYFI	EPVQMECTSF	KVQMKL
P38728	ECM34	YHL043W	50	71	IWLLLCLTLIVGWKVFSGIGG	YEVINRSAFH	RRPSDSNMDG
P38728	ECM34	YHL043W	97	118	TIVILVISLAVSFSWEAFKMY	RNPGFLRRHS	RERTFGKQIT
Q05902	ECM38	YLR299W	13	34	TCFILHIFTLLTLGVLVSGMP	CNRKVPKTLN	SKMVSFASQE
Q06200	ECM7	YLR443W	28	49	LGTTLLIISFGLALTVGPLSS	ALEKVVQWLR	PRTLYMSRLD
Q06200	ECM7	YLR443W	204	225	VLHLLYAVISFQVCMLFFMIW	MRSLKHKKAN	YYYIKGRFMN
Q06200	ECM7	YLR443W	246	267	SLLSLVVFIGGLISSISLAWV	LKERALVHIN	NYTIQSRINT
Q06200	ECM7	YLR443W	287	308	LGVTWFALLWCFAGLISVSCL	ELEAFGFSYH	AWSGLEWCIS
P39540	ELO1	YJL196C	63	84	PVLLFIAMYYVVIFGGRSLVK	VGKQPLSEPR	SCKPLKLRFI
P39540	ELO1	YJL196C	100	121	MLTSVSFLWLILMVEQMLPIV	LRFISQVHNL	YRHGLYFAVC
P39540	ELO1	YJL196C	141	163	TLYYLNYMTKFVEFADTVLMVL	NVESWTQPME	KHRKLTFLHT
P39540	ELO1	YJL196C	174	196	HHGATALLCYNQLVGYTAVTWV	HRKLTFLHTY	PVTLNLAVHV
P39540	ELO1	YJL196C	201	223	LAVHVLMYWYYFLSASGIRVWW	AVTWVPVTLN	KAWVTRLQIV
P39540	ELO1	YJL196C	234	255	FMLDLIVVYYVLYQKIVAAYF	AWVTRLQIVQ	KNACTPQCED
P39540	ELO1	YJL196C	271	292	AIAAGAAILTSYLFLFISFYI	QCEDCLGSMT	EVYKRGSASG
P25358	ELO2	YCR034W	62	83	LPLSTLPPVLYAITAYYVIIF	PSEFQFIAGE	GGRFLLSKSK
P25358	ELO2	YCR034W	96	119	LNGLFQLHNLVLTSLSLTLLLLM	FLLSKSKPFK	VEQLVPIIVQ
P25358	ELO2	YCR034W	122	142	LVPIIVQHGLYFAICNIGAW	LTLLLLMVEQ	TQPLVTLYYM
P25358	ELO2	YCR034W	146	169	VTLYYMNYIVKFIEFIDTFFLVL	CNIGAWTQPL	KHKKLTFLHT
P25358	ELO2	YCR034W	200	221	WVPISLNLGVHVVMYWYYFLA	TQLMGTTSIS	ARGIRVWWKE
P25358	ELO2	YCR034W	231	254	WVTRFQIIQFVLDIGFIYFAVYQ	ARGIRVWWKE	KAVHLYFPIL
P25358	ELO2	YCR034W	275	296	ATFAGCAIISSYLVLFISFYI	HCGDCVGSTT	NVYKRKGTKT
P40319	ELO3	YLR372W	73	94	YHAVSIIIVYYIIIFGGQAIL	IHNKTFLANG	RALNASPLKF
P40319	ELO3	YLR372W	105	126	LLFEIHNLFLTSISLVLWLLM	ALNASPLKFK	LEQLVPMVYH
P40319	ELO3	YLR372W	155	176	LYYLNYLTKFVELIDTVFLVL	KEAFAPKLVT	RRKKLLFLHT
P40319	ELO3	YLR372W	180	201	LLFLHTYHHGATALLCYTQLI	TVFLVLRRKK	GRTSVEWVVI
P40319	ELO3	YLR372W	207	228	WVVILLNLGVHVIMYWYYFLS	TQLIGRTSVE	SCGIRVWWKQ
P40319	ELO3	YLR372W	242	263	FQIIQFLIDLVFVYFATYTFY	RVWWKQWVTR	AHKYLDGILP
P40319	ELO3	YLR372W	283	304	AAAYGYLILTSYLLLFISFYI	NKGTCYGTQA	QSYKKGGKKT
	EMC1	YCL045C	6	26	DLVYVFILLFLNTSCVQAVF	MKITCT	SDDAFITDWQ
P25574	EMC1	YCL045C	723	744	TFEKGKLLITIFVLLVITYFI	PSGQFDLMSP	RPSVSNKKLK
P36039	EMC3	YKL207W	9	30	WVLLPISIVMVLTGVLKQYIM	MLLDDQLKY	TLITGSSANE
P36039	EMC3	YKL207W	125	146	FIPQTIIMWWVNHFFAGFILM	MNMAKGNMAS	QLPFPLTAKF
P36039	EMC3	YKL207W	175	196	SISWYFISVLGLNPVYNLIGL	CQDLDVRWVS	NDQDMGIQAG
P53073	EMC4	YGL231C	97	118	LQIIPIMTALMLLSGPIKAIF	IFMSYMSGTS	STRSAFKPVL
P53073	EMC4	YGL231C	135	156	QVQTAMFMYIVFQGVLMYIGY	PVLGNKATQS	RKLNSMGLIP
P40540	EMC5	YIL027C	6	27	LLYTVSALVLFHSGFSSYEFH	MSFVSK	HLLKLNSLNN
P40540	EMC5	YIL027C	48	69	IMYETYAGLILFVLAVFTSFE	QGAISKLPKD	KLQYLPIESN
Q12431	EMC6	YLL014W	23	44	LLFVQDSSALVLGLVAGFLQI	TANVVDNKKR	ESVHGFIWFL
Q12431	EMC6	YLL014W	48	69	GFIWFLILYNLINVIYIVWIC	AGFLQIESVH	QLQPGKFYQS
Q12431	EMC6	YLL014W	87	108	SFFREITGFVMAWTFGYALIG	QSPLHDIFFE
	EMP24	YGL200C	3	26	FATKFVIACFLFFSASAHNVLLP	MAS	AYGRRCFFED
P32803	EMP24	YGL200C	172	193	WWSIFQLGVVIANSLFQIYYL	TAESTNDRVK	RRFFEVTSLV
	EMP46	YLR080W	28	46	NFINGLIWLYMCVWMVHG	TKAGTKQKKM	KVTQKDELKW
Q12396	EMP46	YLR080W	408	429	IFSKISVWLALLIFIMITLAY	YGKQTKGHDE	YMFRINQDIK
P43555	EMP47	YFL048C	412	433	KLMIWLLPLIFIMLVMAYYTF	DGPQVDEIAR	RIRQEIIKTK
P40085	EMP65	YER140W	87	108	MLFALLTSLDCFLYYFTVLPI	IRIPMFLEKF	RLIKGYVKQF
P40085	EMP65	YER140W	151	172	CMIFIIVISSILLSKLDTSKL	RITSREYKER	YHRIKRQSTM
P40085	EMP65	YER140W	224	245	LVSMSLTYVTIHGYVLVYQAI	SERILLHKCL	SLNIAVNSYS
P40085	EMP65	YER140W	330	351	SIVINILCGPMVSVVGSEVLV	INFWSPRSTL	DWAKHAYITK
P40085	EMP65	YER140W	391	412	LGLPLPAFVVLFIVMVRPTLF	STRTHKLEDR	KSSEPSYLPS
P40085	EMP65	YER140W	428	449	MGASVFLLALLAKFTLDLILI	YLPSLFRILF	KWSKRIEQRF
	EMP70	YLR083C	9	29	LLLLYFFVSTVKAFYLPGVA	MIYKMAHVQ	PTTYRENDNI
P32802	EMP70	YLR083C	302	323	IQWFSLINFSLVVVLLSSVVI	DKYLHVYDPS	HSLLRALKSD
P32802	EMP70	YLR083C	370	391	ILVGSGVQLFLMVTCSIFFAA	RSPSQSLTLS	LGFLSPSSRG
P32802	EMP70	YLR083C	405	426	VMFILYALFGFVGSYTSMGIY	SPSSRGSLAT	KFFNGPYWKA
P32802	EMP70	YLR083C	442	463	LLVPGAILLIIIALNFFLMFV	YWKANLILTP	HSSGVIPAST
P32802	EMP70	YLR083C	474	495	FFMVFLWFLFSIPLSFAGSLI	SSGVIPASTL	ARKRCHWDEH
P32802	EMP70	YLR083C	527	548	ATLIAGIFPFGSIAVELYFIY	FQPWYLKTIP	TSLWFNKIFY
P32802	EMP70	YLR083C	560	581	GFLFFSFLLLTLTSSLVTILI	LWFNKIFYMF	TYHSLCLENW
P32802	EMP70	YLR083C	596	617	GFIIGGAGCALYVFIHSILFT	CLENWKWQWR	KFKLGGFTTI
P32802	EMP70	YLR083C	635	656	VISLLCCLVTGSIGFISSMLF	TIVLYVGYSS	VRKIYSSIKV
P13587	ENA1	YDR040C	63	84	AMVLHQVCNAMIMVLLISMII	LGDDTKIDYK	SFAMHDWITG
P13587	ENA1	YDR040C	90	111	WITGGVISFVIAVNVLIGLVQ	SMIISFAMHD	EYKATKTMNS
P13587	ENA1	YDR040C	282	303	LSKLAVLLFWIAVLFAIIVMA	TNVGTPLHRK	SQKFDVDKRV
P13587	ENA1	YDR040C	312	333	VAIYAICVALSMIPSSLVVVL	ASQKFDVDKR	TITMSVGAAV
P13587	ENA1	YDR040C	815	836	VLQLLAENVAQALYLIIGLVF	RRMTDNIQKF	RDENGKSVFP
P13587	ENA1	YDR040C	848	869	PVEVLWIIVVTSCFPAMGLGL	ENGKSVFPLS	EKAAPDLMDR
P13587	ENA1	YDR040C	885	906	VGIFTWEVIIDTFAYGIIMTG	LMDRPPHDSE	SCMASFTGSL
P13587	ENA1	YDR040C	943	964	SAAFATMTWCALILAWEVVDM	SSCRDVYRSR	RRSFFRMHPD
P13587	ENA1	YDR040C	991	1012	LFWSIIFGFVSAFPVVYIPVI	FFRSIWGNQF	NDKVFLHKPI
P13587	ENA1	YDR040C	1021	1042	IGAEWGLAIAFTIAFWIGAEL	INDKVFLHKP	YKCGKRRYFK
Q01896	ENA2	YDR039C	63	84	AMVLHQVCNAMIMVLVISMAI	LGDDTKIDYK	SFAVRDWITG
Q01896	ENA2	YDR039C	90	111	WITGGVISFVIAVNVLIGLVQ	SMAISFAVRD	EYKATKTMNS
Q01896	ENA2	YDR039C	282	303	LSKLAVLLFWIAVLFAIIVMA	TNVGTPLHRK	SQKFDVDKRV
Q01896	ENA2	YDR039C	312	333	VAIYAICVALSMIPSSLVVVL	ASQKFDVDKR	TITMSVGAAV
Q01896	ENA2	YDR039C	815	836	VLQLLAENVAQALYLIIGLVF	RRMTDNIQKF	RDENGKSVFP
Q01896	ENA2	YDR039C	848	869	PVEVLWIIVVTSCFPAMGLGL	ENGKSVFPLS	EKAAPDLMDR
Q01896	ENA2	YDR039C	885	906	VGIFTWEVIIDTFAYGIIMTG	LMDRPPHDSE	SCMASFTGSL
Q01896	ENA2	YDR039C	943	964	SAAFATMTWCALILAWEVVDM	SSCRDVYRSR	RRSFFRMHPD
Q01896	ENA2	YDR039C	991	1012	LFWSIIFGFVSAFPVVYIPVI	FFRSIWGNQF	NDKVFLHKPI
Q01896	ENA2	YDR039C	1021	1042	IGAEWGLAIAFTIAFWIGAEL	INDKVFLHKP	YKCGKRRYFK
Q12691	ENA5	YDR038C	63	84	AMVLHQVCNAMIMVLVISMAI	LGDDTKIDYK	SFAVRDWITG
Q12691	ENA5	YDR038C	90	111	WITGGVISFVIAVNVLIGLVQ	SMAISFAVRD	EYKATKTMNS
Q12691	ENA5	YDR038C	282	303	LSKLAVLLFWIAVLFAIIVMA	TNVGTPLHRK	SQKFDVDKRV
Q12691	ENA5	YDR038C	312	333	VAIYAICVALSMIPSSLVVVL	ASQKFDVDKR	TITMSVGAAV
Q12691	ENA5	YDR038C	815	836	VLQLLAENVAQALYLIIGLVF	RRMTDNIQKF	RDENGKSVFP
Q12691	ENA5	YDR038C	848	869	PVEVLWIIVVTSCFPAMGLGL	ENGKSVFPLS	EKAAPDLMDR
Q12691	ENA5	YDR038C	885	906	VGIFTWEVIIDTFAYGIIMTG	LMDRPPNDSE	SCMASFTGSL
Q12691	ENA5	YDR038C	943	964	SAAFATMTWCALILAWEVVDM	SSCRDVYRSR	RRSFFRMHPD
Q12691	ENA5	YDR038C	991	1012	LFWSIIFGFVSAFPVVYIPVI	FFRSIWGNQF	NDKVFLHKPI
Q12691	ENA5	YDR038C	1021	1042	IGAEWGLAIAFTIAFWIGAEL	INDKVFLHKP	YKCGKRRYFK
Q08299	ENB1	YOL158C	140	161	IGEIISAATPTFSGLFAGIVI	CWIFALVLYT	QQFGYSGFRL
Q08299	ENB1	YOL158C	187	208	FAMNIFLIPVIINTWVSGNIV	GDLSGLRDRT	SSVAGNVAPY
Q08299	ENB1	YOL158C	224	245	GIFCIIVPISTLILVLPYVYA	VAPYKWRWGY	QYISWRSGKL
Q08299	ENB1	YOL158C	279	300	LIGVILFTAFLVLVLLPLTIA	TLWKFADDIN	GGATSKWREG
Q08299	ENB1	YOL158C	310	331	HIIAMIVVGGCLGFIFLIWEL	GGATSKWREG	KFAKNPFIPR
Q08299	ENB1	YOL158C	337	358	FIPRVYLGDPTIYVALLMEFV	IWELKFAKNP	WRLGLQIELE
Q08299	ENB1	YOL158C	360	381	LGLQIELEYLVTVLMVAFGES	VALLMEFVWR	TLSAQRIAQL
Q08299	ENB1	YOL158C	390	410	LYNFLQSCTNIVVGIMLHFY	STLSAQRIAQ	PHPKVFVVAG
Q08299	ENB1	YOL158C	414	432	VFVVAGSLLGVIGMGLLY	IMLHFYPHPK	KYRVVYDGIS
Q08299	ENB1	YOL158C	435	456	VVYDGISGLIGAEIVVGIAGG	IGMGLLYKYR	MIRFPMWTLV
Q08299	ENB1	YOL158C	480	501	LLMSVYQIGDAVGASIAGAIW	THNEMATVTG	TQRLAKELIQ
Q08299	ENB1	YOL158C	550	571	RLLIIVSISFAAFNAVLCFFL	QMIESYSKIQ	RGFTVNKKQS
Q99382	ENV10	YLR065C	15	36	IIQGLYKQVSLFLGMAIVRLF	GRKQASSNAK	ISRKVTIGQW
Q99382	ENV10	YLR065C	45	66	WIKLVALNVPMFVALYIIVLS	FISRKVTIGQ	GKPKYDGNRV
Q99382	ENV10	YLR065C	89	110	ISYFFDLIYLSLFGNIGIIAF	GIDLNDNTNL	RTFKFWWCLL
Q99382	ENV10	YLR065C	112	133	FKFWWCLLLCPIYAGYKLYGL	GNIGIIAFRT	KNMFMPGAQQ
Q08651	ENV9	YOR246C	26	47	GIGWYTVLHLYLHGFVVYICG	KIAVVTGGNT	RNSHKISKAI
Q08651	ENV9	YOR246C	244	265	LPIVGIFFWLLFQVVGFFFGV	NTNLFSYWTR	SNEQGSLASL
P53938	EOS1	YNL080C	136	157	LLCSLWCLVSLYLSYAILDSL	ALTTARASEY	MVRWIVKYST
P53938	EOS1	YNL080C	167	188	VAAILRMFSMSLIIVTLELLL	MVRWIVKYST	LSSLSPELDY
P53938	EOS1	YNL080C	195	216	LDYFLHTWILISCVLTAVYIW	LLLLSSLSPE	QSYLTSDLRY
P53938	EOS1	YNL080C	321	342	ITVLCVVPVGLASFITMLGLL	TTKRTIDLYK	RNLFIQRLDV
P40557	EPS1	YIL005W	645	666	IIHGNGMPGYLIVIVLFIAIL	PFHNVLSFLD	KGPSIYRRYK
P22140	EPT1	YHR123W	49	69	IITLSGFAFIVINVLTVFYY	HIFPTWMAPN	DPNLNTDTPR
P22140	EPT1	YHR123W	172	193	FSGPVEGILIVCVSLILTGIY	YHTHTLYLSE	GKQVIWHTYL
P22140	EPT1	YHR123W	211	232	VIDVDTLDIVFSLAVFGLVMN	YLFTITVGDK	ALSAKRNVDK
P22140	EPT1	YHR123W	264	282	GLLPFFAYYASIALLVWM	TQIEQDSAIK	QPSFITLSFI
P22140	EPT1	YHR123W	285	308	FITLSFILSVGFTGAFTVGRIIV	IALLVWMQPS	CHLTKQSFPM
P22140	EPT1	YHR123W	321	342	PMLIPLCQIVLYKICLSLWGI	TKQSFPMFNA	ESNKIVFALS
P22140	EPT1	YHR123W	346	367	IVFALSWLGFGLSLGVHIMFM	LSLWGIESNK	NDIIHEFTEY
P38767	ERC1	YHR032W	172	193	LPLIFTFILQNSLSLASIFSV	RETQVITMNA	SHLGTKELGG
	ERC1	YHR032W	200	223	LGGVTLGSMTANITGLAAIQGLC	FSVSHLGTKE	TCLDTLCAQA
P38767	ERC1	YHR032W	248	269	CAVITILAFLPMMYVWFVWSE	YHLVGVLVQR	KILALMIPER
P38767	ERC1	YHR032W	281	302	CALAANYLRVTAFGVPGFILF	LALMIPEREL	ECGKRFLQCQ
	ERC1	YHR032W	313	336	IFHASTIVLFVCAPLNALMNYLL	CGKRFLQCQG	VWNDKIGIGY
P38767	ERC1	YHR032W	345	366	YLGAPLSVVINYWLMTLGLLI	LVWNDKIGIG	YAMTTKHKER
	ERC1	YHR032W	397	420	INLAIPGVVMVEAEFLGFEVLTI	EQAFKNWRKM	FASHLGTDAL
	ERC1	YHR032W	429	452	LGAQSIVATIASLAYQVPFSISV	IFASHLGTDA	STSTRVANFI
P38767	ERC1	YHR032W	471	492	ITCRVSLLLSFVCSSMNMFVI	IGASLYDSCM	CRYKEQIASL
P16151	ERD1	YDR414C	24	45	FIVLIILALWIWTWILKFFLH	NILNVPPPQR	SNLDVSQVIL
P16151	ERD1	YDR414C	84	105	IIIPFHFATVFLFEFMNIIEG	ARNFALKITR	PLKNIILIVY
P16151	ERD1	YDR414C	109	130	IILIVYFLPLIQCVTIFWFLL	MNIIEGPLKN	KECQIIKYCT
P18414	ERD2	YBL040C	2	21	PFRILGDLSHLTSILILIH	MN	NIKTTRYIEG
P18414	ERD2	YBL040C	35	53	TQTLYALVFITRYLDLLT	TRYIEGISFK	FHWVSLYNAL
P18414	ERD2	YBL040C	62	82	LMKIFFIVSTAYIVVLLQGS	TFHWVSLYNA	KRTNTIAYNE
P18414	ERD2	YBL040C	102	116	HLLIGSALMSVFFH	MLMHDTFKIQ	HKFTFLELAW
P18414	ERD2	YBL040C	123	143	LAWSFSVWLESVAILPQLYM	FFHHKFTFLE	LSKGGKTRSL
P18414	ERD2	YBL040C	155	174	HYIFAMGLYRALYIPNWIW	KGGKTRSLTV	RYSTEDKKLD
P18414	ERD2	YBL040C	185	206	IAFFAGLLQTLLYSDFFYIYY	YSTEDKKLDK	TKVIRGKGFK
Q06551	ERF2	YLR246W	75	96	LWLGVLLAIVCPMVLFSIFEA	RFRTVKGAKP	HKLWHTQNGY
Q06551	ERF2	YLR246W	104	125	GYKVLVIFFYYFWVITLASFI	EAHKLWHTQN	RTATSDPGVL
Q06551	ERF2	YLR246W	217	238	FLIFLLGAILSSVILLTNCAI	NCIGKRNYRF	HIARESGGPR
Q06551	ERF2	YLR246W	250	271	PVAILLLCYAGLTLWYPAILF	ARESGGPRDC	TYHIFMAGNQ
P32476	ERG1	YGR175C	16	37	ITYDAIVIGAGVIGPCVATGL	APELINADNT	ARKGKKVLIV
P32476	ERG1	YGR175C	474	495	GIMILITAIRVFTPFLFGELI	FLGLPMALLE	G
P10614	ERG11	YHR007C	20	41	HFLALPLAQRISLIIIIPFIY	ALEYVNIGLS	NIVWQLLYSL
	ERG11	YHR007C	57	80	LVFYWIPWVGSAVVYGMKPYEFF	LYSLRKDRPP	EECQKKYGDI
P32352	ERG2	YMR202W	2	23	FFPLLLLIGVVGYIMNVLFTT	MK	WLPTNYMFDP
P32462	ERG24	YNL280C	13	34	FGGLIGALGISIGLPVFTIIL	ALNPRTTEFE	NQMIRPDYFI
P32462	ERG24	YNL280C	71	90	LWTVYCLWYGILAVLDVIL	PLRYYLGNRE	PGRVMKGVQL
P32462	ERG24	YNL280C	109	127	INGIAMSTTLVLVLAIRW	LRDGSKLSYK	KLTDGQLPEL
P32462	ERG24	YNL280C	147	172	CIISILFSFFLATYCYVASFIPLIF	QYLYENHVSL	KKNGNGKREK
P32462	ERG24	YNL280C	242	263	INDALVLVNFLQGFYIFDGVL	LHHHYLKTGK	NEEGVLTMMD
	ERG24	YNL280C	277	297	GFGFMLAFGDLSLVPFTYSL	VLTMMDITTD	QARYLSVSPV
P32462	ERG24	YNL280C	308	328	LGWVKVVGILAIMFLGFHIF	ARYLSVSPVE	HSANKQKSEF
P32462	ERG24	YNL280C	368	387	INYFGDWLISLSWCLATWF	CDGWWAKSQH	QTPLTYYYSL
P53045	ERG25	YGR060W	55	76	LMFFLLHEFMYFFRCLPWFII	YMNNDVLATG	DQIPYFRRWK
P40030	ERG28	YER044C	25	46	WLLFISIVSVFNSIQTYVSGL	AAMPKGYLPK	ELTRKVYERK
P40030	ERG28	YER044C	92	113	ELVFMSYMVALFHFGSELLIF	AMYLNEPHIF	RTCKLGKGFM
P40030	ERG28	YER044C	120	136	GFMGPLVVSTTSLVWM	LIFRTCKLGK	YKQREYYTGV
P32353	ERG3	YLR056W	92	113	FLSLWVIVTIFGLLLYLFTAS	LLPRSSILRE	LSYVFVFDKS
P32353	ERG3	YLR056W	140	161	LAVSAIPWMSMLTVPWFVMEL	LKNQMAMEIK	NGHSKLYMKI
	ERG3	YLR056W	180	203	LIIEYFTFIFFTDCGVYLAHRWL	IDYENHGVRK	HWPRVYRALH
P32353	ERG3	YLR056W	242	263	HIYPLILPLHKVSYLILFTFV	VDGFLQSISY	NFWTVMIHDG
P25340	ERG4	YGL012W	39	64	FGGTTGVIGMLIGFPLLMYYMWICA	WLKPNEIEYE	EFYHGKVALP
P25340	ERG4	YGL012W	101	123	WTIFLTFWVFQIIFYYTLPGIW	LENGIPEKYD	TKGQPLSHLK
P25340	ERG4	YGL012W	138	157	YFCNAMWTLYVTTTLVLVL	LSHLKGKQLP	HFTNLFRLYV
P25340	ERG4	YGL012W	174	197	IMTCAIISGFAFSIILYLWTLFI	LYVIIDRFGR	SHDYHRMTGN
P25340	ERG4	YGL012W	232	249	VRLPWFTLYFITLGACL	GILDLKMFFE	KQWETYGYVT
	ERG4	YGL012W	297	320	LIFWNIAGVPYTYCHCTLYLYYH	DMAYEKFGFM	DPSEYHWSTL
P25340	ERG4	YGL012W	326	346	WSTLYNVSLYVVLLCAYYFF	LYYHDPSEYH	DTANAQKNAF
P25340	ERG4	YGL012W	414	439	VWALSCGFNSVFPWFFPVFFLVVLI	HYTADWTQSL	HRAFRDQAKC
P29704	ERG9	YHR190W	290	311	STFQFCAIPQVMAIATLALVF	LTYLAGIHEQ	NNREVLHGNV
P29704	ERG9	YHR190W	420	441	FNMVLSIILSVLLGFYYIYTL	VPTQQEEEYK	HRA
P62651	ERI1	YPL096C-A	7	28	FLVLGFTYSVLLISLATFYWL	MRPRDQG	RNNDSFLHYW
P62651	ERI1	YPL096C-A	33	54	FLHYWCVLLLCPATLWLWALI	TFYWLRNNDS	AWCDSEMFAS
	ERJ5	YFR041C	6	29	PALVVLGLVSLSYAFTTIETEIF	MNGYWK	QLQNEISTKY
P43613	ERJ5	YFR041C	130	151	TWFLLAFIWIVVNIGQYIISI	GFYFSRMKPK	IQYRSQRSRI
	ERP1	YAR002C-A	4	27	SLLQVFACCLVLPAQVTAFYYYT	MLLT	SGAERKCFHK
Q05359	ERP1	YAR002C-A	186	207	AMWWIVIQLIVLAVTCGWQMK	RDASEAVNSR	HLGKFFVKQK
	ERP2	YAL007C	4	24	TIALPSFFIVLILALVNSVA	MIKS	ASSSYAPVAI
P39704	ERP2	YAL007C	182	203	WLSILIIIIIAVISIAQVLLI	TVNSTESRLT	QFLFTGRQKN
Q12403	ERP3	YDL018C	195	216	IYGILLIIGMSCAQIAILEFI	STEHRIVMFS	FRESRKHNV
Q12450	ERP4	YOR016C	174	195	WLSLLIMGVMVGISIVQALII	TVSSTESRLT	QFFFTSRQKN
	ERP5	YHR110W	3	26	NIVHGICLLFAITQAVGAVHFYA	MKY	KSGETKCFYE
P38819	ERP5	YHR110W	178	199	KIMTWSVFQLLILLGTCAFQL	FRNQSESANS	RYLKNFFVKQ
	ERP6	YGL002W	4	27	YIFLAFVLLPFRVSAFYFYGYGG	MLSH	DRKCFLKELS
P53198	ERP6	YGL002W	183	204	AMWWTVTQVTLLIIICVWQMK	RDISESVNSR	SLRSFFVKQK
P17261	ERS1	YCR075C	6	28	ILGIVYVTSWSISMYPPIITNW	MVSLDD	RHKSASAISM
P17261	ERS1	YCR075C	39	62	FVMLNTAGYSYLVISIFLQLYCW	HKSASAISMD	KMTGDESDLG
P17261	ERS1	YCR075C	80	102	FWYCLHGCLMNVVLLTQVVAGA	LGRPKLTQFD	RIWRFPGKGH
P17261	ERS1	YCR075C	117	138	WYLRILLASLAIFSLLTVQFM	PGKGHRKMNP	YSNYWYDWHN
P17261	ERS1	YCR075C	150	175	TLAYCNNLFLLKISMSLIKYIPQVT	NYWYDWHNSR	HNSTRKSMDC
P17261	ERS1	YCR075C	184	205	CFPIQGVFLDVTGGIASLLQL	THNSTRKSMD	IWQLSNDQGF
P17261	ERS1	YCR075C	226	247	VGLSMVTLIFNFIFIMQWFVY	LDTFVTNFGK	RSRGHDLASE
P53173	ERV14	YGL054C	6	27	ILAVVVNCINLFGQVHFTILY	MGAWLF	ADLEADYINP
P53173	ERV14	YGL054C	52	73	ALHGALSLLFLLNGYWFVFLL	KVNKLITPEA	NLPVLAYNLN
P53173	ERV14	YGL054C	111	132	LGFHLLMFFFYLYRMIMALIA	GKHKRESFLK	ESGDDF
P38312	ERV15	YBR210W	7	28	LFVTGLILNCLNSICQIYFTI	MSGTGLS	LYGDLEADYI
P38312	ERV15	YBR210W	55	76	ILQAFISALFLFNGYWFVFLL	RVNRLSVPEA	NVPVLAYNAS
P38312	ERV15	YBR210W	114	135	LGFYLLIFFFYFYRMVTALLE	GRCKIECFLK	NDANLIS
Q12284	ERV2	YPR037C	12	35	IVAALGIIGLWMFFSSNELSIAT	QIVKRSHAIR	PGLIKAKSGI
P54837	ERV25	YML012W	180	201	NFSILVIIVLSSLGVWQVNYL	TNESTNRRVR	KNYFKTKHII
P53337	ERV29	YGR284C	108	129	FFVVVFLVVVTVSMLIGASLL	YLNKWKHYPY	VLRKQTNYAT
P53337	ERV29	YGR284C	137	158	ATGVLCACVISQALVYGLFTG	LLVLRKQTNY	SSFVLRNFSV
P53337	ERV29	YGR284C	160	181	FVLRNFSVIGGLLIAFSDSIV	LVYGLFTGSS	QNKTTFGMLP
P53337	ERV29	YGR284C	209	230	ILIVLMFIAFTFSKSWFTVVL	AKGYLLFAGR	TIIGTICFAI
P53337	ERV29	YGR284C	245	266	FASIMLGLILTFYNITLNNYW	ICFAIGYKTK	FYNNTKRDFL
P53337	ERV29	YGR284C	282	303	NLSIIGGLLLVTNTGAGELSV	RDFLKYEFYQ	DEKKKIY
Q04651	ERV41	YML067C	23	44	GGLTSLLTYLFLLFIAWTEFG	EEQYKKKSTK	EYFGGYIDQQ
Q04651	ERV41	YML067C	311	332	FLVYCASWIFTLLDMALITIM	FLVRLVAICS	GPKWSLRYQP
P39727	ERV46	YAL042W	24	45	AGGLITLSCILTTLFLLVNEW	TEEDVRVRTR	GQFNSVVTRP
P39727	ERV46	YAL042W	376	397	WSGFILNCITSIGGVLAVGTV	VINKEQHGQT	MDKLFYKAQR
P53918	ESBP6	YNL125C	208	229	GGYGWVVTFCVFLTMFSTWGC	STGQLELPPD	NASFGVDLAY
P53918	ESBP6	YNL125C	255	276	LIAGLTVFLGQLLSPLVMALM	YPGASKYDYA	RIIGLRTTML
P53918	ESBP6	YNL125C	277	298	IIGLRTTMLFGDAVMLAAYLL	LSPLVMALMR	ASFTTKLWQL
P53918	ESBP6	YNL125C	315	336	VGCSISLIFVPATTVLPGWFL	WQLYVTQGFM	KKRAVAMGVS
P53918	ESBP6	YNL125C	339	360	AVAMGVSLLGTGAGGVVYGLA	VLPGWFLKKR	TNKMLSDFGN
P53918	ESBP6	YNL125C	372	393	WCLRIIGISCSISVLVAIALL	KMLSDFGNTR	KERNPTPAIG
P53918	ESBP6	YNL125C	426	447	FVVLIALWFMFALFAYNMMVF	MFSLKVITKP	TLSSYAISKG
P53918	ESBP6	YNL125C	504	525	MFAFWIPAHTFVQLIFFSILV	IVLTTLLTIY	GSCVGVANVM
P53918	ESBP6	YNL125C	549	570	LPAWAFVNYCGAPFLLVCEVI	IADMVKPEEF	AQALTVEKDK
P53918	ESBP6	YNL125C	584	605	LHAQIFCGCCFIAALILISIL	TVEKDKSNPY	REYSIRMKLT
Q06001	FAR10	YLR238W	454	475	FTLLTFGTISIGIIAIVFKIL	FSIKNTLCNH	SPN
P38225	FAT1	YBR041W	5	26	VVVFALSRIFLLLFRLIKLII	MSPIQ	TPIQKSLGYL
P38225	FAT1	YBR041W	53	71	WYIIPYFLKSVFCYIIDV	LDRKYRYKED	RRHRFQNWYL
P38225	FAT1	YBR041W	148	169	LFVFLWLSLWNIGAIPAFLNY	YVAIDCTNKP	NTKGTPLVHS
P38225	FAT1	YBR041W	292	313	VFTAMPLFHSTAALLGACAIL	HVLHMTNEST	SHGGCLALSH
P17064	FCY2	YER056C	98	119	MVIASYALGALGPMVFGLNFG	NAASMWFSAN	QSVLVIIFFN
P17064	FCY2	YER056C	121	141	VLVIIFFNIMGLIFVAFFSV	MVFGLNFGQS	FGAELGLRQM
	FCY2	YER056C	163	186	RIFSLINVIACVGWGIVNTSVSA	SRYLVGNVTA	QLLNMVNEGS
P17064	FCY2	YER056C	198	218	VCPIWAGCLIIIGGTVLVTF	LNMVNEGSGH	FGYSVIHAYE
	FCY2	YER056C	229	249	WSWVPNFAVFLVIIAQLSRS	GYSVIHAYEK	GKFKGGEWVG
P17064	FCY2	YER056C	256	276	WVGGATTAGSVLSFGSSIFG	SRSGKFKGGE	FAAGWTTYAA
P17064	FCY2	YER056C	300	320	IFFSLVAGLAFPLFFTMILG	YMPKSTNKYK	AASAMAALND
P17064	FCY2	YER056C	347	367	AILVPNSLNGFGQFCCVLLA	DKNAMGGVIY	LSTIANNIPN
	FCY2	YER056C	370	390	IANNIPNMYTVALSAQALWA	FCCVLLALST	PLAKIPRVVW
P17064	FCY2	YER056C	398	418	VWTMAGNAATLGISIPATYY	WAPLAKIPRV	FDGFMENFMD
	FCY2	YER056C	428	448	SIGYYLAIYIAISCSEHFFY	FDGFMENFMD	RRSFSAYNID
P17064	FCY2	YER056C	465	485	LPIGIAGTAALIVGAFGVAL	NIDDWDNWEH	GMCQTYWVGE
P40039	FCY21	YER060W	90	111	WFSANMVLPAYAIGALGPMVF	DDSILNAASM	DLNFGQSVFV
P40039	FCY21	YER060W	118	139	VFVIIFFNLLGLVSVAFFSVF	MVFDLNFGQS	GAELGLRQMI
P40039	FCY21	YER060W	161	182	IFSFINFIACIGWGIVNTVAS	RYLVGNIAAR	SQVLNMVNPG
P40039	FCY21	YER060W	198	219	AGCIVIIGATVIVTFFGYGVI	VNPGHQCPLW	HAYEKWAWVP
P40039	FCY21	YER060W	221	242	YEKWAWVPNFAVFLVIIARLA	TFFGYGVIHA	RSKKFVLGEW
P40039	FCY21	YER060W	260	281	NVLSFGSTVYGFAAGWTTYAA	EWTSGPTTAG	DYTVYMPRKT
P40039	FCY21	YER060W	295	316	IFFSLVVGLATPLYFTMILGA	YMPRKTNKYK	AVAMAAIGDP
P40039	FCY21	YER060W	340	361	TFAVLVPNSVHGFGQFCCVLL	YYDENSIGGL	SLSTIANNVP
P40039	FCY21	YER060W	393	414	IWTLLGNAAALGIAIPACYYF	WEPLAKVPRV	STFMNYFMDS
P40039	FCY21	YER060W	416	437	FMNYFMDSIGYYLAIYIAIAC	AIPACYYFST	SEHFIYRRSF
P40039	FCY21	YER060W	460	481	LPIGIAGTAALIVGAFGVALG	NVDDWDSWER	MCQTYWVGEI
P40039	FCY21	YER060W	493	514	LIGDYGGDIGFELGLSWAFIV	QTYWVGEISR	YNIARPFELK
Q12119	FCY22	YER060W-A	95	116	MVIVAYSVGALGPLVFGLNFG	NAATIWFSAN	QSVLVIIFFN
Q12119	FCY22	YER060W-A	118	139	VLVIIFFNILGLIPVALFSLF	LVFGLNFGQS	GVELGLRQMI
Q12119	FCY22	YER060W-A	161	182	FFSLVNVIACVGWCVLNISVS	RYLAGNITAR	AQLLNMVNEG
Q12119	FCY22	YER060W-A	196	217	CPIWAGCLIIAGGTVLVTFFG	NMVNEGSGHN	YSVVHAYEKW
Q12119	FCY22	YER060W-A	219	240	VVHAYEKWSWVPNFAAFLVII	TVLVTFFGYS	AQLSRSGKFK
Q12119	FCY22	YER060W-A	262	283	GVLSFGSSVFGSAAGWATYAA	EWVGGATTAG	DYTVYMPKTT
Q12119	FCY22	YER060W-A	297	318	IFFSVVAGLAFPLFFTMILGA	YMPKTTSKYK	ACGMAALNDP
Q12119	FCY22	YER060W-A	344	365	AILVPNSLNGFGQFCCVLLAL	DKNAMGGVIY	STVANNVPGM
Q12119	FCY22	YER060W-A	371	392	VPGMYTVALSAQALWAPLAKI	LLALSTVANN	PRVVWTMAGN
Q12119	FCY22	YER060W-A	395	416	VWTMAGNAATLGISIPATYYF	WAPLAKIPRV	DGFMENFMDS
Q12119	FCY22	YER060W-A	417	438	GFMENFMDSIGYYLAIYIAIA	ISIPATYYFD	CSEHFIYRRS
Q12119	FCY22	YER060W-A	462	483	LPIGIAGTAALIAGAFGVALG	NIDDWDNWEH	MCQTYWVGEI
P25621	FEN2	YCR028C	27	48	LLLFKIDLFVLSFVCLQYWIN	VSSKRAIKKR	YVDRVGFTNA
P25621	FEN2	YCR028C	79	100	VFMIGYIVGMVPNNLMLLCVP	VGNDLTVSNT	PRIWLSFCTF
P25621	FEN2	YCR028C	102	123	IWLSFCTFAWGLLTLGMYKVT	NLMLLCVPPR	SFKHICAIRF
P25621	FEN2	YCR028C	132	153	FFQALFESCTFSGTHFVLGSW	TSFKHICAIR	YKEDELPIRS
P25621	FEN2	YCR028C	164	185	IFTGSGLVGSMFSGFMQTSIF	KEDELPIRSA	THLNGRNGLA
P25621	FEN2	YCR028C	198	219	WLFIIDFCITLPIAIYGFIFF	NGRNGLAGWR	PGLPDQTSAV
P25621	FEN2	YCR028C	271	292	WHWWMFSLVWVLGGENLGFAS	WSTIPRVLKR	NSTFALWLQN
P25621	FEN2	YCR028C	312	333	YPSGIFAVGIVSTLCSAVYMS	QKYTLAQRNN	KIPRARHWHV
P25621	FEN2	YCR028C	342	363	VSVFISLVMVIVAVLIRADPL	SKIPRARHWH	NPKVVFSAQY
P25621	FEN2	YCR028C	372	393	YLGGVAYAGQAVFFSWANIIC	LNPKVVFSAQ	HADLQERAIV
P25621	FEN2	YCR028C	401	422	IVLASMNMFSGAVNAWWSILF	ICHADLQERA	FASDMVPKFE
P25621	FEN2	YCR028C	434	455	CYALLATAISSGIVSVVIRSL	SDMVPKFERG	QIKENLSKKQ
P38993	FET3	YMR058W	559	584	GIIAMTFSCFAGILGIITIAIYGMM	AFIPTGFTKK	DMEDATEKVI
P40988	FET4	YMR319C	97	118	AVFFIVWIILIIWVVIGIVYN	DFLVRVAGSQ	APFNWQVVMQ
P40988	FET4	YMR319C	225	246	IAAMVIFWIGIFVWIGCGAIP	SNVASRYMGS	KDAGNTPPYT
P40988	FET4	YMR319C	271	292	AWQMYINTAVAVSLLICTTFL	SNPRLKKFSD	QNIRARHDYF
P40988	FET4	YMR319C	354	375	IIGTGIGVLIGVAVFATWIGI	GRKMIDWYAD	GSPMKWDDNW
P40988	FET4	YMR319C	383	404	NWWLIIGTYTGLIGFLDGFVL	GIGSPMKWDD	REVYFRIVQH
P40988	FET4	YMR319C	465	486	PWSVLVSVIIIIGLICIASGL	SQYINRICST	RWSTTGQLIA
P40988	FET4	YMR319C	493	514	LIANTPTMIIEEFFLLVLLQA	SGLRWSTTGQ	HNWADRQRRV
P43561	FET5	YFL041W	573	594	ALIISTIIGVWGLYSIAQYGI	PKGFTTEGYL	GEVIPNDEKV
Q08913	FEX1	YOR390W	11	32	LSHYIHVFCTFTTFCILGTET	IFNPVISNHK	RQAITALSTY
Q08913	FEX1	YOR390W	34	55	AITALSTYTPAFVTAPTVLWS	FCILGTETRQ	NCSSCMLMGI
Q08913	FEX1	YOR390W	79	100	VLFLGVTTGYCGALSSFSSML	NAYTWMKDHQ	LEMFEHSTNL
Q08913	FEX1	YOR390W	127	148	IMEFLSVLLVHLMVSMGSLIF	HTKLPNRAYG	GRQLGKEVIV
Q08913	FEX1	YOR390W	213	234	LAYALAFPLIILFVVLCAYYE	FKKFFDIVDK	NYSRGKWTLP
Q08913	FEX1	YOR390W	241	262	TLPCLFGIFAGFLRYWLAEMF	YYENYSRGKW	NKTNKKFPLG
Q08913	FEX1	YOR390W	268	289	FPLGTFLANVFATLLIGIFTM	AEMFNKTNKK	VQRGKKHFST
Q08913	FEX1	YOR390W	310	331	HIVSALISGFCGTLSTISTFI	VPIVNSLNSC	NEGYKLSFIN
Q08913	FEX1	YOR390W	338	359	FINMLIYYTVSIAISYCLLVI	TFINEGYKLS	TLGSYAWTRG
Q08991	FEX2	YPL279C	11	32	LSHYIHVFCTFTTFCILGTET	IFNPVISNHK	RQAITALSTY
Q08991	FEX2	YPL279C	34	55	AITALSTYTPAFVTAPTVLWS	FCILGTETRQ	NCSSCMLMGI
Q08991	FEX2	YPL279C	79	100	VLFLGVTTGYCGALSSFSSML	NAYTWMKDHQ	LEMFEHSTNL
Q08991	FEX2	YPL279C	127	148	IMEFLSVLLVHLMVSMGSLIF	HTKLPNRAYG	GRQLGKEVIV
Q08991	FEX2	YPL279C	213	234	LAYALAFPLIILFVVLCAYYE	FKKFFDVVDK	NYSRGKWTLP
Q08991	FEX2	YPL279C	241	262	TLPCLFGIFAGFLRYWLAEMF	YYENYSRGKW	NKTNKKFPLG
Q08991	FEX2	YPL279C	268	289	FPLGTFLANVFATLLIGIFTM	AEMFNKTNKK	VQRGKKHFST
Q08991	FEX2	YPL279C	310	331	HIVSALISGFCGTLSTISTFI	IPIVNSLNSC	NEGYKLSFIN
Q08991	FEX2	YPL279C	338	359	FINMLIYYTVSIGISYCLLVI	TFINEGYKLS	TLGSYAWTRG
P53279	FHN1	YGR131W	7	28	LVRIINAVFLIISIGLISGLI	MLSAADN	GTQTKHSSRV
P53279	FHN1	YGR131W	41	62	MFAAVYGLVTDSLYGFLANFW	TKHSSRVNFC	TSLTYPAILL
P53279	FHN1	YGR131W	69	90	ILLVLDFLNFIFTFVAATALA	NFWTSLTYPA	VGIRCHSCKN
P53279	FHN1	YGR131W	122	143	AVAFFYFSCFLFLIKVTVATM	SSSRCHQSQA	GMMQNGGFGS
P38224	FIG1	YBR040W	16	37	IFALAFNLISIFLLIFLLIGC	IWFFTKRMPR	YNPSNQSTFL
P38224	FIG1	YBR040W	162	183	VLMATVILTILMFLFILYVTV	LTSVNVIHPY	PKLPFKLAVN
P38224	FIG1	YBR040W	194	215	FLLLLSSTIVLTWGIGAMWTH	KLPFKLAVNK	VGINASYRLV
P38224	FIG1	YBR040W	242	263	VMAWFSFAFLLLDSVVLWLIF	ITVKKGKKAA	LRDRKSLKDE
P40515	FIS1	YIL065C	131	149	VVVAGGVLAGAVAVASFF	DKIQKETLKG	LRNKRR
P38631	FKS1	YLR342W	454	475	IWVMHISIFWMYFAYNSPTFY	WLHLVTNFNR	THNYQQLVDN
P38631	FKS1	YLR342W	492	513	WASCALGGTVASLIQIVATLC	VDNQPLAAYK	EWSFVPRKWA
P38631	FKS1	YLR342W	531	552	FWFLCIIFGINLGPIIFVFAY	WAGAQHLSRR	DKDTVYSTAA
P38631	FKS1	YLR342W	563	584	VVAAVMFFVAVATIIFFSIMP	KDTVYSTAAH	LGGLFTSYMK
P38631	FKS1	YLR342W	621	642	YLVWVTVFAAKYSESYYFLVL	PLHGLDRWMS	SLRDPIRILS
P38631	FKS1	YLR342W	678	699	LVIATDFILFFLDTYLWYIIV	CKVQPKIVLG	NTIFSVGKSF
P38631	FKS1	YLR342W	1358	1379	TLSIFIVFWIAFVPIVVQELI	QPAVDWVRRY	ERGLWKATQR
P38631	FKS1	YLR342W	1444	1465	FAGSAIYMGARSMLMLLFGTV	RIPFSILYSR	AHWQAPLLWF
P38631	FKS1	YLR342W	1469	1490	APLLWFWASLSSLIFAPFVFN	LLFGTVAHWQ	PHQFAWEDFF
P38631	FKS1	YLR342W	1560	1581	IMAEIIPCAIYAAGCFIAFTF	DASRAHRTNL	INAQTGVKTT
P38631	FKS1	YLR342W	1601	1622	IIICTLAPIAVNLGVLFFCMG	DDDRVNSVLR	MSCCSGPLFG
P38631	FKS1	YLR342W	1643	1664	GIAHGVAVIVHIAFFIVMWVL	CCKKTGSVMA	ESFNFVRMLI
P38631	FKS1	YLR342W	1672	1695	LIGVVTCIQCQRLIFHCMTALML	VLESFNFVRM	TREFKNDHAN
P38631	FKS1	YLR342W	1802	1823	LYFLVLAIFAGCIIGPAVASA	RKRMVKKYCS	KIHKHIGDSL
Q04952	FKS3	YMR306W	336	357	FWIIHFAPFWFFTTFNSPTLY	WKHCFTNFNR	TKNYIQLLNN
Q04952	FKS3	YMR306W	374	395	LSVIAFGGTIACLVQILATVF	LNNQPTPQVR	EWGFVPREWP
Q04952	FKS3	YMR306W	414	435	IGLLFCLAINLGPSVYVLGFF	PGAQHLSSRM	EWDVHSKSAY
Q04952	FKS3	YMR306W	443	464	AYIVSIVQLIIAFLTTFFFAV	FFEWDVHSKS	RPLGGLFRPY
Q04952	FKS3	YMR306W	507	528	LWVFVYLAKYIESYFFLTLSL	TGRSKWFSYG	RDPIRVLSIM
Q04952	FKS3	YMR306W	546	567	YLLGPILCKWQAKITLVLMLL	IMDLSRCQGE	SDLGLFFLDT
Q04952	FKS3	YMR306W	571	592	LFFLDTYLWYIICNCIFSIVL	LVLMLLSDLG	SFSLGTSILT
Q04952	FKS3	YMR306W	711	732	LATPISEPVPVDCMPTFTVLV	KRRISFFAQS	PHYSEKILLG
Q04952	FKS3	YMR306W	1214	1235	LFISFSVQLFFVLLLNLGALN	YAHPGFHLNN	HEIIACFYDK
Q04952	FKS3	YMR306W	1267	1288	VSIFVLSIFIVFFIAFAPLLI	CYNIQPALHW	QEVLEKGIWR
Q04952	FKS3	YMR306W	1302	1323	FLHHLLSMAPLFEVFVCQVYS	EKGIWRAASR	NSLLMDLTFG
Q04952	FKS3	YMR306W	1369	1390	FFMLLFAIISMWQPALLWFWI	NISIYSGFQV	TVISMCFAPF
Q04952	FKS3	YMR306W	1393	1414	SMCFAPFIFNPHQFAFMDFFI	ALLWFWITVI	DYKTFIHWLF
Q04952	FKS3	YMR306W	1474	1495	FAELFLPFCVFLFNFTAFSFI	SKKARFWNVF	NAQTGVSDST
Q04952	FKS3	YMR306W	1513	1534	LLVTFLPIFLNSIVLFLLFWV	STPTSAVFRL	SLFVVPGLSY
Q04952	FKS3	YMR306W	1548	1569	AGAVIAFIAHTFSVLVYLLDF	VPGLSYCCKD	ELMWFLQGWN
Q04952	FKS3	YMR306W	1584	1605	ILLITCINMHLILFKVFTTIF	LQGWNFTRTL	LTREYKNNKA
Q04952	FKS3	YMR306W	1654	1675	FFLGHFLLFIQTPIILLPFID	IMESSYFAAD	YWHTMVLFWM
Q04952	FKS3	YMR306W	1712	1733	FSLYFVMLGVLLFMLIAPFFA	ALRSRIVSKY	GDFVSSPQEL
	FLC1	YPL221W	3	21	LVTLWCLICTCLVLPVAA	MQV	KKRTLTASSL
Q08967	FLC1	YPL221W	163	184	IGVKWVTAVIAGIGLLTSAVL	FFSNGKTVSQ	STFGNSTAAS
Q08967	FLC1	YPL221W	194	215	HISANTMSLFLYFQSVAVVAM	STFGNSTAAS	QHVDSVPPIA
Q08967	FLC1	YPL221W	223	244	IAAAWSENLAWSMGLIRITFM	AMQHVDSVPP	QKIFRWYVEA
Q08967	FLC1	YPL221W	249	272	WYVEATGGSASLYLTATTMSVLT	RITFMQKIFR	QRGLDYLKNT
Q08967	FLC1	YPL221W	317	338	IVCTGFTFFVLCGYFLAGFIM	GYRMKIENTA	ACKYSIELCI
Q08967	FLC1	YPL221W	372	393	LLRYIYIGFTQLTILSFWEFT	KNWRSVLKGS	ERDSAGVIVI
Q08967	FLC1	YPL221W	397	418	AGVIVIACLFIVLSCGLMAWA	SFWEFTERDS	AYRTIFFASK
Q08967	FLC1	YPL221W	461	482	YWWNALLTTYILVKALFVGFA	FFYTMFNAKH	QASGKTQALA
Q08967	FLC1	YPL221W	484	505	SGKTQALAIFIIDLAYFVAII	KALFVGFAQA	RYKPYLDRPT
Q08967	FLC1	YPL221W	516	537	IVNIFICTVTLVNSFLFMFFS	YKPYLDRPTN	NLFNQKYAVS
Q08967	FLC1	YPL221W	551	572	WVFFIMNAAFSLLLLLMILAF	QKYAVSAIMG	TTIILFSKNP
P39719	FLC2	YAL053W	182	203	AWPIAAISGVGVLTSGFVSVI	NGKTVQTKYA	GYSATAAHIA
P39719	FLC2	YAL053W	211	232	IASNSISLFIYFQNLAITAMM	VIGYSATAAH	GVSRVPPIAA
P39719	FLC2	YAL053W	347	368	FFLTGIVFFLFFLFVVVVSLI	AYLANIELSN	FFKALLEVLT
P39719	FLC2	YAL053W	402	423	TLFRLSIIAFPQVSLLAIWEF	RKNWGSIIKG	TQVNSPAIVV
P39719	FLC2	YAL053W	430	451	IVVDAVVILLIITGLLVYGTI	WEFTQVNSPA	RVFIKGRESL
P39719	FLC2	YAL053W	492	513	FWWLLPLLSYAFLRSLFVAVL	FLYVQFKADK	QNQGKAQAMI
P39719	FLC2	YAL053W	521	542	MIIFVIELAYFVCLCWIRPYL	VLQNQGKAQA	DKRTNVFNIA
P39719	FLC2	YAL053W	547	568	VFNIAIHLVNLINAFFFLFFS	IRPYLDKRTN	NLFKQPAVVS
P39719	FLC2	YAL053W	581	602	AVILFVLNAVFALFLLLFTIV	KQPAVVSSVM	TCTLALLHRN
P53121	FLC3	YGL139W	169	190	IGVKWATAVVAGIGLLLSAIL	YFSNGKTVSQ	STFGNSTAAS
P53121	FLC3	YGL139W	200	221	HISANTMSLFLYFQSVVVVAM	STFGNSTAAS	QHVHRVPPIA
P53121	FLC3	YGL139W	229	250	IAAAWAENLVWSMGLIRISFM	AMQHVHRVPP	QRIFRWYVQS
P53121	FLC3	YGL139W	255	278	WYVQSTGGTPSLYLTSTSMSVLA	RISFMQRIFR	QRSWQYLMEL
P53121	FLC3	YGL139W	323	344	IVCTGFTFFVLCGYVLAGFII	GYKMGIENTS	VFKCCVELAT
P53121	FLC3	YGL139W	377	398	ALLRYIYIGFVQLTILSFWEF	RKQWRMILKG	TERDSPAVIV
P53121	FLC3	YGL139W	405	426	VIVIACLFILLSCGLMLWAAW	WEFTERDSPA	RTVFFARRSV
P53121	FLC3	YGL139W	467	488	YWWNIVLLSYIFVKSLLVGFA	FFYTMFNANH	QASGQTQVLF
P53121	FLC3	YGL139W	495	516	VLFMFILDLFYFVAIIYYKPY	GFAQASGQTQ	LDRPTNIMNI
P53121	FLC3	YGL139W	525	546	ILIATVTVVNSFLFMFFSDLF	YLDRPTNIMN	NQSYKVAAIM
P53121	FLC3	YGL139W	557	578	WIFFIMNAAFSFILLMMILAF	QSYKVAAIMG	AGMMLFSKNP
P38124	FLR1	YBR008C	103	124	LVVFQIMLLTCVTYMGSSIYT	PQNWPLLKKS	PGQEYIQEEF
P38124	FLR1	YBR008C	138	159	VVATLNLSLYVLGYGLGPIIF	YIQEEFHVGH	SPLSETARYG
P38124	FLR1	YBR008C	178	199	FFFMIFQVGCATVHNIGGLIV	GRLNLYMVTL	MRFISGILCS
P38124	FLR1	YBR008C	202	223	ISGILCSPSLATGGGTVADII	NIGGLIVMRF	SPEMVPLVLG
P38124	FLR1	YBR008C	229	250	LVLGMWSAGAVAAPVLAPLLG	ADIISPEMVP	AAMVDAKNWR
P38124	FLR1	YBR008C	260	281	FIFWLLMWLSAATFILLAFFF	AAMVDAKNWR	PETQHHNILY
P38124	FLR1	YBR008C	346	367	IAVAYGCFYLFFEAFPIVFVG	EPAILAFDLY	IYHFSLVEVG
P38124	FLR1	YBR008C	375	396	VGLAYMGFCVGCVLAYGLFGI	VGIYHFSLVE	LNMRIIVPRF
P38124	FLR1	YBR008C	415	436	FLIVAMCVCWCLPLSLFLFGW	FRNGTFTPEA	TARVHWILPV
P38124	FLR1	YBR008C	439	460	VHWILPVISEVFFVLAVFNIF	SLFLFGWTAR	QATFAYLATC
P38124	FLR1	YBR008C	475	496	ASVFAGNGFCRASFACAFPLF	YLATCYPKYV	GRAMYDNLAT
P38124	FLR1	YBR008C	510	531	VAWGSSLVGFLTLGLAIIPFI	YDNLATKNYP	LYKYGPSLRT
P40464	FLX1	YIL134W	12	33	VISGLSAGSVTTLVVHPLDLL	DHQWTPLQKE	KVRLQLSATS
P40464	FLX1	YIL134W	76	97	LSINLFGNAIAWGVYFGLYGV	RSVTNELYRG	TKELIYKSVA
P40464	FLX1	YIL134W	128	149	LSAGASSGLMTAILTNPIWVI	NDHKMNSLIY	KTRIMSTSKG
P40464	FLX1	YIL134W	182	203	LWKGLVPALFGVSQGALYFAV	QLLRTDGFQG	YDTLKQRKLR
P40464	FLX1	YIL134W	229	250	IEITSLGKMVSVTLVYPFQLL	LDIHLTNLET	KSNLQSFRAN
P40464	FLX1	YIL134W	265	286	LFPLIKLIIANDGFVGLYKGL	SFRANEQKFR	SANLVRAIPS
P40098	FMP10	YER182W	28	49	WIPWTIFGGSFLGGWYLTQHM	FKTASKPKRR	TFTDLLAYWR
P40098	FMP10	YER182W	138	159	LGMKLTGYPFLIHGGILATVI	SRRETVGLYH	EDLMKEAIRL
Q08023	FMP25	YLR077W	82	105	AVGQGILILVVVGGLGTAYLRWP	LQWERMAKLS	ELKSWWLIKM
Q02883	FMP30	YPL103C	53	76	YARILLLSVLVPYTGYAFYVSLA	TRPIQKCSRK	TVKQIDLRNE
P43557	FMP32	YFL046W	183	206	VMQWLIGVCTGTFALVLAYMRLL	KMQIDSVKTQ	T
P46998	FMP33	YJL161W	33	54	LYTSLLVTTLYGTGLACLYLE	GSKPLFSKGN	SNSLNKSKEQ
P46998	FMP33	YJL161W	120	141	FSIVWGFLIQLSSLIGNSTLG	HSLTYSDVSQ	KKSILYKGSV
P46998	FMP33	YJL161W	144	165	ILYKGSVVSVLGFPPLIYMAL	IGNSTLGKKS	KLRMKQLEKA
Q04991	FMP42	YMR221C	11	32	VACACIWCLFSAGIIFGFAAL	TSTRTLRYAQ	KPILISEGVY
Q04991	FMP42	YMR221C	64	85	FIFALSATVTNIMALPVGKIL	LCTAQDLKLN	DMYGPRVCGI
Q04991	FMP42	YMR221C	91	112	VCGIIGSCLLFLASGNFISAK	GKILDMYGPR	HLVSLWDPYL
Q04991	FMP42	YMR221C	119	140	PYLVGYTLLAVAGPFVFISCF	SAKHLVSLWD	QLANSFPQRS
Q04991	FMP42	YMR221C	150	171	GTVLALLTGSFDSSSALFLLY	QLANSFPQRS	RLLYQNWFPT
Q04991	FMP42	YMR221C	186	207	FFTLYLIVPVFILACQLTIMP	NWFPTLNVSR	HSSYKTVNHI
Q04991	FMP42	YMR221C	302	323	WFYLMLLFALVAMLRINYFIA	KSAYEQIKSP	TVRTQEEYLL
Q04991	FMP42	YMR221C	344	365	IFDMLLPLGGAVSIPFIGLLL	DPDLALKLNS	DHTDTLSTLT
Q04991	FMP42	YMR221C	385	406	VFGLIPNSFTWNLIGIVLLVV	ILFTTSTAIG	YRPFYYTVVS
Q04991	FMP42	YMR221C	421	442	VFGFDTFGTVYGLLSCICGIF	YTVVSDYSSK	NMSQNLLDKW
Q04991	FMP42	YMR221C	462	483	PINLTLVILTVVFSLTLTFYI	THTTFNMNPF	RSQILPKPVN
Q07651	FMP45	YDL222C	5	26	FVNLLVFLFLLGAGLLTFFLI	MIFKR	LSGGRESGTL
Q07651	FMP45	YDL222C	116	137	LLISLFFIVLALVPGFLATFL	YYLSRVGWAM	PFKAVPVLYC
Q07651	FMP45	YDL222C	140	161	AVPVLYCVLSWLAFFFIILAA	GFLATFLPFK	CLYTGCYVKA
Q07651	FMP45	YDL222C	188	209	FAFIWTSVFLMLVNAIWSTIF	GRSARLGPKN	SATHKAHSTY
P23900	FPS1	YLL043W	254	275	EFLAEFMGTMVMIIFGSAVVC	WSSVKNTYLK	QVNVAGKIQQ
P23900	FPS1	YLL043W	325	346	VALGWAAAVVMGYFCAGGSAI	SSVAGGTFDD	SGAHLNPSIT
P23900	FPS1	YLL043W	369	390	VPYYFAGQLIGAFTGALILFI	LVYRGFPLKK	WYKRVLQEAY
P23900	FPS1	YLL043W	446	467	PYTCLSSDVFPLMMFILIFII	LQAGTFALTD	NASMAYQTGT
P23900	FPS1	YLL043W	506	527	HFFWVPMVGPFIGALMGGLVY	DHKMLWVHHH	DVCIYQGHES
	FRE1	YLR214W	6	29	LFCLFISFFATVQSSATLISTSC	MVRTRV	ISQAALYQFG
P32791	FRE1	YLR214W	148	169	AWGLVFFWVAVLTAATILNIL	HLNLMRSQWC	KRVFGKNIMA
P32791	FRE1	YLR214W	215	236	GLVVLIFVILTILSLSFGHNI	LPFNFTTRGK	KLPHPYDRPR
P32791	FRE1	YLR214W	259	280	LMAIALFPVVYLFGIRNNPFI	SMAFVSRRAD	PITGLSFSTF
P32791	FRE1	YLR214W	296	317	SAYVCFMLAVVHSIVMTASGV	FSTFNFYHKW	KRGVFQSLVR
P32791	FRE1	YLR214W	328	349	FYFRWGIVATILMSIIIFQSE	RGVFQSLVRK	KVFRNRGYEI
P32791	FRE1	YLR214W	358	378	IFLLIHKAMNIMFIIAMYYH	EKVFRNRGYE	CHTLGWMGWI
P32791	FRE1	YLR214W	383	401	WMGWIWSMAGILCFDRFC	AMYYHCHTLG	RIVRIIMNGG
P36033	FRE2	YKL220C	164	185	IYGGIICAYFVAIMAFAGVLH	GFYANLDVGN	CMNYTPFKTV
P36033	FRE2	YKL220C	235	256	LEGIIILGYLVLHTVFLAYGY	RIFTGYLPTR	EYDPENIIFK
P36033	FRE2	YKL220C	280	301	GVLAFAHFPLIVLFAGRNNFL	QVARYVADRS	EYISGVKYTS
P36033	FRE2	YKL220C	317	340	WLGRMMFLDAMIHGSAYTSYTVA	KYTSFIMFHK	NKTWATSKNR
P36033	FRE2	YKL220C	353	374	QFGVAALCLAGTMVFFSFAVF	WATSKNRLYW	RKYFYEAFLF
P36033	FRE2	YKL220C	377	398	FYEAFLFLHIVLGAMFFYACW	FFSFAVFRKY	EHVVSLSGIE
P36033	FRE2	YKL220C	400	423	VVSLSGIEWIYTAIAIWIVDRII	AMFFYACWEH	RIIKASYFGF
	FRE3	YOR381W	1	21	YWVLLCGSILLCCLSGASAS	M	PAKTKMYGKL
Q08905	FRE3	YOR381W	166	187	GGIICAYFVGVMILASILHYL	YANYDIGHTY	SYTPFKTALF
Q08905	FRE3	YOR381W	237	258	GVIILGYLVLHTVFLAYGYQY	FTGFLPTRSE	DPYNLIFDSR
Q08905	FRE3	YOR381W	280	301	GVLAFAHFPLIALFAGRNNFL	QIARYVADRS	EFISGVKYTS
Q08905	FRE3	YOR381W	321	341	MMFLDAVIHGAAYTSYSVFY	FIMFHKWLGR	KDWAASKEET
Q08905	FRE3	YOR381W	353	374	QFGVAALCIVGVMVFFSLAMF	WAASKEETYW	RKFFYEAFLF
Q08905	FRE3	YOR381W	376	397	FFYEAFLFLHIVLGALFFYTC	VFFSLAMFRK	WEHVVELSGI
Q08905	FRE3	YOR381W	398	419	EHVVELSGIEWIYAAIAIWTI	LGALFFYTCW	DRLIRIVRVS
P53746	FRE4	YNR060W	156	177	YYFGGIICAYFVGVMLLAGLI	YGYYYNHDIP	RFLNYTPIKK
P53746	FRE4	YNR060W	228	249	FETLVILGYLILHTIFMAYKY	KVITGYLPTR	QYDPYHIIFA
P53746	FRE4	YNR060W	267	288	FVAYRSGILSFAHLPLIVLFA	FAAHRAEVAH	GRNNFLQLIS
P53746	FRE4	YNR060W	304	325	FIVFHKWLGRMMFLDAIIHAA	QLISGLKHTS	GFTNYYLYYK
P53746	FRE4	YNR060W	346	367	KFGIATTCLAGMLIFFSIAAF	WNTVRLRVYW	RRHYYETFMA
P53746	FRE4	YNR060W	373	394	TFMALHIVFAALFLYTCWEHV	IAAFRRHYYE	TNFSGIEWIY
P53746	FRE4	YNR060W	395	416	NFSGIEWIYAAIAIWGVDRIV	FLYTCWEHVT	RITRIALLGF
Q08908	FRE5	YOR384W	163	184	GVTICLYWIGVLFIAAVYHFL	LDNIDKGNVY	NFSRLKQTVF
Q08908	FRE5	YOR384W	222	243	FFIGLVPTRLETLVLFGYVLL	HNHAMSVGRW	HGFLLSSYNF
Q08908	FRE5	YOR384W	267	288	IFLSDRAGILAFAHFPLIVLF	LLSDRRSQVL	GGKNSTMTWL
Q08908	FRE5	YOR384W	311	334	WLGRFMLVDCTIHAIGYTYHAYI	RYTAFITYHK	ENYWKYVKYS
Q08908	FRE5	YOR384W	347	368	TSGRHAMIIVGILVFFSFFFF	WKYVKYSDLW	RRHYYELFVI
Q08908	FRE5	YOR384W	371	392	YYELFVITHIILAIGFFHACW	FFSFFFFRRH	KHCYKLGWGE
Q08908	FRE5	YOR384W	403	424	IMACALFWIADRILRLIKIAI	HCYKLGWGEW	FGMPWAKLKL
Q12473	FRE6	YLL051C	167	188	SVYGAYLTYYFVIVGIIAVFF	HAHAYNLDIS	HMSHYNGLNR
Q12473	FRE6	YLL051C	244	265	AWIIFGYTLANIIFLSISYII	FTGLMPNSLE	DPYNLIFNSH
Q12473	FRE6	YLL051C	287	308	GILAFTQFPLIIIFTARNSFL	QFTRLLADRS	EFLTGVKFNS
Q12473	FRE6	YLL051C	328	349	IMVLNATIHSLSYSLFAIINH	FISFHKWIGR	AFKISNKQLY
Q12473	FRE6	YLL051C	360	381	KFGIASITVLCVLLVLSLGIV	FKISNKQLYW	RKRHYEFFLY
Q12473	FRE6	YLL051C	387	408	FFLYTHIILALLFFYCCWQHV	LGIVRKRHYE	KIFNGWKEWI
Q12473	FRE6	YLL051C	416	437	WIVVSLLIWGLEKLFRIWNIL	HVKIFNGWKE	QFRFPKATLI
Q12333	FRE7	YOL152W	45	66	FVTYFVAVIIFLSLIKKLAFM	PWVYQKQYGK	YYDSSEEFLP
	FRE7	YOL152W	82	105	TTPSVFLARIMTKLVAFNRYICY	EFLPEKKNSP	RKFPTLIFSY
Q12333	FRE7	YOL152W	107	128	FPTLIFSYLGIPTSVGTFLVV	AFNRYICYRK	MATTLYTLLY
Q12333	FRE7	YOL152W	167	188	LVPFVFSLSGKINVIGWLVGL	SVRAGIMAIS	SYEKINIYHQ
Q12333	FRE7	YOL152W	194	215	IYHQWASILCLFFSWVHVIPF	LVGLSYEKIN	LRQARHEGGY
Q12333	FRE7	YOL152W	237	258	WRSGVPPILFLNLLWLSSLPI	MHQRWKASDM	ARRHFYEIFL
Q12333	FRE7	YOL152W	265	286	IFLQLHWILAVGFYISLFYHV	LPIARRHFYE	YPELNSHMYL
Q12333	FRE7	YOL152W	292	313	HMYLVATIVVWFAQLFYRLAV	FYHVYPELNS	KGYLRPGRSF
Q12209	FRE8	YLR047C	35	56	ICLLISFIIICVIIPLMNYLL	RTLRVRKYSQ	LTDKFFKICH
Q12209	FRE8	YLR047C	89	110	LQLCLICFVFTSFFVIQGANG	HKTHMYHKQS	DLLEITKRMG
Q12209	FRE8	YLR047C	128	149	PLLFLTLRPSPLPHTLYLALL	MGRISVALMP	PLHKWISRIV
Q12209	FRE8	YLR047C	157	178	IVVLESILHTWFYLYYMYIND	LLPLHKWISR	TLYVKMRKLP
Q12209	FRE8	YLR047C	186	207	LPNIYGVIALGLFLLIAITSV	NDTLYVKMRK	RYARRWSYRV
Q12209	FRE8	YLR047C	216	237	VFYYVHYVSTWLILVFLHYHA	VRYARRWSYR	RPGISYYTTL
Q12209	FRE8	YLR047C	267	288	VTIVPISSSLSLLEFPLTDLP	YRLHITNVTR	KKPILPGGHL
Q12209	FRE8	YLR047C	402	423	FMCVGGSGISFGLPLLRILNF	LNFLIKAQRV	NGVNVRLLWV
Q99332	FRT1	YOR324C	574	595	FIIDIIAFLLMGGFIVYVKNL	NTKSIYLYRY	LTRFFTR
P39734	FRT2	YAL028W	504	521	ALDIVFLIIIIVICYTF	VTFASKYRNE	KHLVSHK
Q12029	FSF1	YOR271C	97	118	NLVVTVGMLTPGLGTAGTVFW	PFRMSSNVLS	QWANQSLNVA
Q12029	FSF1	YOR271C	142	163	SQLLTNYAAAVTASCGVALGL	NANKSHPMST	NNLVPRLKNI
Q12029	FSF1	YOR271C	178	199	LILGRLVPFAAVVSAGIVNVF	RLKNISPHSK	LMRGNEIRKG
Q12029	FSF1	YOR271C	271	292	ANLGLISVTMFSALPFALGIF	KGKSLGVQTL	PQRQAIHLNK
P38310	FTH1	YBR207W	11	32	FFIFLRESLEIVVIVSILLTI	AFEDYFSFQI	VKQGLSVEDD
P38310	FTH1	YBR207W	135	156	AGGAFGLLLCMLIGGAFVSIF	LYQKLKIQIL	YHIGTDLWTL
P38310	FTH1	YBR207W	170	191	YEGVLSLVASVIISVMGLFFL	TDLWTLSEHY	RMGKLREKFR
	FTH1	YBR207W	230	253	SFFILPFITTLREGLEAVVFIGG	QKGVKFSEKY	IGIDQPLSSI
	FTH1	YBR207W	262	285	IPLSMVLATAISTVFGIFFFRYS	GIGIDQPLSS	SSLSLKICLV
P38310	FTH1	YBR207W	289	310	LKICLVVATCFLYLIAAGLFS	FFFRYSSSLS	KGVWQLELQD
P38310	FTH1	YBR207W	358	379	GWMIFTAIFGWTNSATVGSVI	VNCCNGEKDG	SYNAYWLVLI
P40088	FTR1	YER145C	7	28	VAVFFVVFRECLEAVIVISVL	MPNKVFN	LSFLKQAIGE
P40088	FTR1	YER145C	50	71	VWVGVLLGFIICLAIGAGFIG	RALYRKLRIQ	AYYSLQKDIF
P40088	FTR1	YER145C	86	107	LWEGIFCMIATIMISMMGIPM	QKDIFGSAED	LRMNKMQSKW
P40088	FTR1	YER145C	146	167	MFLLPFITVLREGLEAVVFVA	KIGFLSRRYA	GAGITTQGSH
P40088	FTR1	YER145C	182	203	LPVVVGLICGGLVGYLLYYGA	TQGSHASAYP	SKSSLQIFLI
P40088	FTR1	YER145C	206	227	SLQIFLILSTSILYLISAGLF	YLLYYGASKS	SRGAWYFENY
P40088	FTR1	YER145C	293	314	SMLCYNIYWLVLIIVLSLMIF	LGWQNTGYLS	EERRGHLPFT
	FUI1	YBL042C	131	149	YIFFWISGSFNVNTWQIS	AKRRTWTWKQ	ATGLQLGLNW
P38196	FUI1	YBL042C	162	180	WICIWVGYTFVAFFLILG	LQLGLNWWQT	SKVGNNYHIS
P38196	FUI1	YBL042C	200	225	IYFSIWIVINRVVMACVWNSTLAYI	FPISSRVSFG	GSQCVQLMLK
P38196	FUI1	YBL042C	259	276	FMCFMVFWVACLPFLWF	IKNPNLTNFE	PPDKLRHIFA
P38196	FUI1	YBL042C	283	305	IFALKSAITPFAAFGFLIWTLC	LWFPPDKLRH	KAKGHLALGS
P38196	FUI1	YBL042C	367	392	LIALPVCYAIISLIGILSVSAAYTL	KTYKSSVYSQ	YGVNYWSPLD
P38196	FUI1	YBL042C	416	435	AGVFLISFIFAFDQLGANL	YLDNYTSGNR	SGNSIPAGTD
P38196	FUI1	YBL042C	460	477	YICALISLAICPWDLLS	PKFINIRRGS	SSSKFTTALA
P38196	FUI1	YBL042C	483	507	TALAAYAVFLSAIAGVISADYFIV	DLLSSSSKFT	RKGYVNIFHC
P38196	FUI1	YBL042C	537	562	VVAYIFGIAPNFAGFLGSVGVSVPI	YNKYGTNWRA	GAMKVYYLNY
P38196	FUI1	YBL042C	572	590	FVGYLLAALSYCILVYFY	GAMKVYYLNY	PIKGIPGDAK
P18411	FUN14	YAL008W	38	59	PLTRSVGLGGAGIVAGGFYLM	RFNVANKLGK	NRQPSKLIFN
P18411	FUN14	YAL008W	111	132	FGVVLGVTVAKISILFMYVGI	SHKQMFLGSL	TSMLLCEWLR
P18411	FUN14	YAL008W	171	192	GLLGTEYMGFKVFFTLSFVLA	DVDLKKLLID	SLNANK
P31381	FUN26	YAL022C	75	96	LSYITFFAIGIGLLWPWNCIL	TLPLRKKLKN	SASQYFKHDI
P31381	FUN26	YAL022C	115	136	IFTSSMMSFSTISSMLFNIYL	IFKDTSIWAK	AKRQYKYSRR
P31381	FUN26	YAL022C	150	171	LVWEIIVFTVMCFFTILHFLL	YKYSRRVING	PKWFNFMFIM
P31381	FUN26	YAL022C	173	194	WFNFMFIMMLVVISSMGTAMT	FTILHFLLPK	QNGIMAIANV
P31381	FUN26	YAL022C	213	234	MVGQAVAGVLPSLVLFALAFI	VFGSEYSQGV	ENSSVSTTGG
P31381	FUN26	YAL022C	242	263	GGILLYFFTTTLVVTICVVMF	FIENSSVSTT	SVSKISRKVN
P31381	FUN26	YAL022C	343	364	LVLSIFTTFVVTLVFPVFASA	FEVLFAKLKY	TYVTGLPLSN
P31381	FUN26	YAL022C	366	387	VTGLPLSNAQYIPLIFTLWNL	VFPVFASATY	GDLYGRVIAD
P31381	FUN26	YAL022C	410	431	TFIYSLLRVAAIPLFLMFTAI	FRDQKFTPRK	TSSSSGDEEH
P31381	FUN26	YAL022C	445	466	IVDLCYMLLQFLFGVTNGHVI	SGDEEHNGSV	SMSFMKVPEQ
P31381	FUN26	YAL022C	491	512	IFVSTGLALGSIISYVFVFII	EKEAAGGFTN	DFIIR
	FUR4	YBR021W	74	97	IYYEYVVVDKSILGVSILDSFMY	KPQYSSFWKK	NQDLKPVEKE
	FUR4	YBR021W	109	132	VWSWYNYCYFWLAECFNINTWQI	DLKPVEKERR	AATGLQLGLN
P05316	FUR4	YBR021W	142	163	WWQCWITIWIGYGFVGAFVVL	AATGLQLGLN	ASRVGSAYHL
P05316	FUR4	YBR021W	172	193	LSFPISSRASFGIFFSLWPVI	LASRVGSAYH	NRVVMAIVWY
P05316	FUR4	YBR021W	196	217	VMAIVWYSVQAYIAATPVSLM	FSLWPVINRV	LKSIFGKDLQ
P05316	FUR4	YBR021W	241	262	YEFMCFFIFWAASLPFLLVPP	DHFGSPNATT	HKIRHLFTVK
P05316	FUR4	YBR021W	267	288	LFTVKAVLVPFASFGFLIWAI	LLVPPHKIRH	RRAHGRIALG
P05316	FUR4	YBR021W	309	330	FSWAFLRSLMGCMANFSTMVI	LTDVQPHGSA	NAPDFSRFSK
P05316	FUR4	YBR021W	349	370	LVCIPFLFSITCLIGILVTAA	KNPNSALWSQ	GYEIYGINYW
P05316	FUR4	YBR021W	399	420	AGVFLISFVFAVAQLGTNISA	LQTTYNKGTR	NSLSCGTDMS
P05316	FUR4	YBR021W	441	462	GSLFCAAMALCICPWNLMATS	IFPKFINIKR	SKFTMALSAY
P05316	FUR4	YBR021W	464	485	FTMALSAYAIFLSSIAGVVCS	PWNLMATSSK	DYFVVRRGYI
P05316	FUR4	YBR021W	520	541	ALAAYLCGVAPCLPGFIAEVG	YGNRFGINWR	APAIKVSDGA
P05316	FUR4	YBR021W	558	579	YWVGYGLSFSSYTALCYFFPV	DGAMKLYYLS	PGCPVNNIIK
P11710	FUS1	YCL027W	71	96	IGLSIGLPIGIFCFGLLILLCYFYL	AQPKSSSAST	KRNSVSISNP
Q08559	FYV12	YOR183W	108	128	LMTTFLLYVLYVCIYISAFI	KVVTLSKHRE	K
P25585	FYV5	YCL058C	25	46	IISICFSMLSFVFDFSVRICS	TTIPYKEKPD	RTLESFSWSL
P25585	FYV5	YCL058C	55	76	LISSSAFKVVSAFSLAGSCVL	SRTLESFSWS	ASRSSVGIIV
P25585	FYV5	YCL058C	81	102	VGIIVSLLLFNFSTCNFVLFL	GSCVLASRSS	SAVLIDLFFC
P25585	FYV5	YCL058C	105	126	LIDLFFCTFLPTPTFLPTPFF	CNFVLFLSAV	FMLHLPIFSL
P25585	FYV5	YCL058C	126	147	FMLHLPIFSLLNALELLYLII	TPTFLPTPFF	AGLHI
P38297	FZO1	YBR179C	705	726	TLTLYFLGSTKVVGNIILNGI	PSLLFTSKIP	KLSSWSSLKK
P38297	FZO1	YBR179C	736	757	LSVPVIVVGSLLGLTYLIHDL	KLSSWSSLKK	PRALPMNLSI
P39012	GAA1	YLR088W	19	40	IIALLPVISMLCALFGFISIA	RIVDMGLVPR	ILPMDGQYRR
P39012	GAA1	YLR088W	356	377	YLPSAVALSIAFAISSLNAFI	APRQFVSISS	NNAYANISLF
P39012	GAA1	YLR088W	394	415	LLVWFVSLVISFVVSQAFLLI	SLFSEYNLVA	PSSGLLMTIS
P39012	GAA1	YLR088W	464	485	LMINFAMALLIGTLAFPMTFV	LYFSLVSTSL	KTIVESSSEH
P39012	GAA1	YLR088W	535	556	NLVLLILTNPFISITLFGLFF	TPQQQKQKLK	DDEFHGFDII
P39012	GAA1	YLR088W	577	598	CWSWFVLCIGWLPCWLLILAS	KLVSAWLDLK	SFESKSVVVR
P41733	GAB1	YLR459W	135	156	IIFTNFAISSSLYCILAEGNV	TLLSCISRSS	LLSSVMISIS
P41733	GAB1	YLR459W	160	181	VMISISGYLSVYPILLLIPLL	LAEGNVLLSS	GMLKSWRQRI
P41733	GAB1	YLR459W	190	211	ILSAIVSILSLLILLLFSYSI	LGMLKSWRQR	LGSQSWSFLT
P41733	GAB1	YLR459W	224	245	GSIITFEKVFPNLGLWWYFFI	QSWSFLTQVY	EMFDTFIPFF
P41733	GAB1	YLR459W	250	271	FIPFFKAVFNIFIAVFITPFT	WYFFIEMFDT	LRYHKQPFYA
P41733	GAB1	YLR459W	297	318	LGDAGFFFSFLPFFTPLFGYL	WIVLTKPYPS	RYPIISALLF
P41733	GAB1	YLR459W	324	345	ALLFLHAIVLAPIFYHLWVVL	FGYLRYPIIS	GSGNSNFFYA
P41733	GAB1	YLR459W	351	372	FFYAISLVYALAIASILVDLN	WVVLGSGNSN	WAMLRIEYDN
P13181	GAL2	YLR081W	70	91	VSLLCLCVAFGGFMFGWDTGT	PKKPMSEYVT	ISGFVVQTDF
P13181	GAL2	YLR081W	121	142	GLIVAIFNIGCAFGGIILSKG	GTHYLSNVRT	GDMYGRKKGL
P13181	GAL2	YLR081W	149	170	KGLSIVVSVYIVGIIIQIASI	SKGGDMYGRK	NKWYQYFIGR
P13181	GAL2	YLR081W	175	196	YFIGRIISGLGVGGIAVLCPM	QIASINKWYQ	LISEIAPKHL
P13181	GAL2	YLR081W	207	228	GTLVSCYQLMITAGIFLGYCT	ISEIAPKHLR	NYGTKSYSNS
P13181	GAL2	YLR081W	242	263	VPLGLCFAWSLFMIGALTLVP	KSYSNSVQWR	ESPRYLCEVN
P13181	GAL2	YLR081W	342	362	LTGNNYFFYYGTVIFKSVGL	MGVFVQMFQQ	DDSFETSIVI
P13181	GAL2	YLR081W	366	387	ETSIVIGVVNFASTFFSLWTV	FKSVGLDDSF	ENLGHRKCLL
P13181	GAL2	YLR081W	394	415	CLLLGAATMMACMVIYASVGV	WTVENLGHRK	TRLYPHGKSQ
P13181	GAL2	YLR081W	435	456	IVFTCFYIFCYATTWAPVAWV	PSSKGAGNCM	ITAESFPLRV
P13181	GAL2	YLR081W	472	493	LASASNWVWGFLIAFFTPFIT	PLRVKSKCMA	SAINFYYGYV
P13181	GAL2	YLR081W	499	520	YGYVFMGCLVAMFFYVFFFVP	PFITSAINFY	ETKGLSLEEI
P19145	GAP1	YKR039W	95	116	QMIAIGGAIGTGLLVGSGTAL	LKHHLKNRHL	RTGGPASLLI
P19145	GAP1	YKR039W	121	142	ASLLIGWGSTGTMIYAMVMAL	SGTALRTGGP	GELAVIFPIS
P19145	GAP1	YKR039W	165	185	SFGYANNFNYMLQWLVVLPL	TTYATRFIDE	EIVSASITVN
P19145	GAP1	YKR039W	204	224	DGFVALFWLAIVIINMFGVK	NFWGTDPKYR	GYGEAEFVFS
P19145	GAP1	YKR039W	237	256	VITVVGFIILGIILNCGGG	EAEFVFSFIK	PTGGYIGGKY
P19145	GAP1	YKR039W	280	298	KFKGVCSVFVTAAFSFAG	GAFAGDTPGA	SELVGLAASE
P19145	GAP1	YKR039W	321	342	QVFWRITLFYILSLLMIGLLV	PRKSVPKAAK	PYNDKSLIGA
P19145	GAP1	YKR039W	376	396	VVNVVILIAVLSVGNSAIYA	KTHGIKGLPS	CSRTMVALAE
P19145	GAP1	YKR039W	421	442	RPLVGIAVTSAFGLIAFVAAS	EIFSYVDRKG	KKEGEVFNWL
P19145	GAP1	YKR039W	451	472	LLALSGLSSLFTWGGICICHI	SKKEGEVFNW	RFRKALAAQG
P19145	GAP1	YKR039W	491	510	SPTGVWGSYWGLFMVIIMF	GRGLDELSFK	IAQFYVAVFP
P19145	GAP1	YKR039W	529	548	FFEAYLSFPLVMVMYIGHK	PVGDSPSAEG	IYKRNWKLFI
P32621	GDA1	YEL042W	9	24	FAIGAFAVIMLILLI	MAPIFRNYR	KTSSIGPPSI
P38301	GDT1	YBR187W	3	24	MIKKASLIALLPLFTAAAAAA	MGN	TDAETSMESG
P38301	GDT1	YBR187W	45	66	VSMIGLSEIGDKTFLIAALMA	SSHLKSFLMS	MRHKRVLVFS
P38301	GDT1	YBR187W	71	92	VLVFSAAATSLAIMTILSGVV	AALMAMRHKR	GHSAVAFLSE
P38301	GDT1	YBR187W	104	125	TAFFAGILFLVFGYKLTMEGL	SAVAFLSERY	EMSKDAGVEE
P38301	GDT1	YBR187W	183	204	LASFMFSPVWVQIFLMVFLGE	GKKIVHRIRE	LGDRSQISII
P38301	GDT1	YBR187W	222	243	WYVIAGAVIGHAICSGLAVVG	IIAMATDSDY	GKLLATRISI
P38301	GDT1	YBR187W	255	276	ITLASSLLFFIFALMYIYQAF	LLATRISIRT	TTQD
P37020	GEF1	YJR040W	75	96	FITLSSTAIVIGCIAGFLQVF	REVIWDRAKT	TETLVNWKTG
P37020	GEF1	YJR040W	154	175	VSPFIIFMLLSVLFALISTLL	QGLWIAWKGH	VKYVAPMATG
P37020	GEF1	YJR040W	177	198	YVAPMATGSGISEIKVWVSGF	FALISTLLVK	EYNKEFLGFL
P37020	GEF1	YJR040W	203	224	FLGFLTLVIKSVALPLAISSG	WVSGFEYNKE	LSVGKEGPSV
P37020	GEF1	YJR040W	264	285	ASGAGVAVAFGAPIGGVLFGL	YSSQYEYITA	EEIASANRFN
P37020	GEF1	YJR040W	296	319	STLWKSYYVALVAITTLKYIDPF	EIASANRFNS	RNGRVILFNV
P37020	GEF1	YJR040W	336	357	VQEIPIFIALGIFGGLYGKYI	FNVTYDRDWK	SKWNINFIHF
P37020	GEF1	YJR040W	369	390	MYLSSWPVQEVLFLATLTALI	WNINFIHFRK	SYFNEFLKLD
P37020	GEF1	YJR040W	436	457	FLKIFTSLCFATVIRALLVVV	QLDENTHAFE	SYGARVPAGI
P37020	GEF1	YJR040W	465	486	GIFVPSMAVGATFGRAVSLLV	VVSYGARVPA	ERFISGPSVI
P37020	GEF1	YJR040W	500	523	YAFLGAAATLSGITNLTLTVVVI	SGPSVITPGA	MFELTGAFMY
P37020	GEF1	YJR040W	529	552	AFMYIIPLMIVVAITRIILSTSG	VVVIMFELTG	ISGGIADQMI
P39722	GEM1	YAL048C	634	655	LIFGSTVGFVALCSFTLMKLF	AKDVDYRQTA	KSSKFSK
P53171	GEP7	YGL057C	249	266	SKAIISFVVFVSIYVWL	RFTWKSIDPF	DESAKQKTKE
P53192	GET1	YGL020C	1	21	HWAAAVAIFFIVVTKFLQYT	M	NKYHEKWISK
P53192	GET1	YGL020C	104	125	LLALTVPFFVFKIMYGKTPVY	AFQAHLHKLR	KLSSSTSTLF
P53192	GET1	YGL020C	181	198	VSLGIWVWALMNVINGV	SKFDDMALQS	EFIVKQLFLT
P40056	GET2	YER083C	148	169	LKAWTILVKWVFFLLPYLYLI	LDYHDYLLNR	TRPNSSVWPA
P40056	GET2	YER083C	196	216	FTRIFATFEFLSISIYYQLL	WFAPLRNPSN	KNVEHKSKIK
P40056	GET2	YER083C	263	284	LLSMLITDISFVLIVLGLLTY	KLITLLQYWD	L
P25596	GEX1	YCL073C	58	79	KILLISTAFVCGFGISLDYTL	MSAQFDSLKY	RSTYTGYATN
P25596	GEX1	YCL073C	120	141	HFGRLRLFLVATIFYIMGTII	SQVVYSRLSD	QSQATRLTMY
P25596	GEX1	YCL073C	152	173	AGSVFYNCGYVGTNLLLTLIL	SQATRLTMYA	SDFSSLKWRM
P25596	GEX1	YCL073C	186	207	YASYWPYIIIPWISGNIITAA	SSLKWRMFYQ	NPQKNWSWNI
P25596	GEX1	YCL073C	216	237	IAMWAFIYPLSALPIIFLILY	ANPQKNWSWN	MKYKSSKTAE
P25596	GEX1	YCL073C	275	296	IVGILLITVSLGCILVPLTLA	NLVFLFWKLD	NETSQKWHNS
P25596	GEX1	YCL073C	306	327	KIIATLVSGGCLFFIFLYWEA	NETSQKWHNS	KFAKSPLLPF
P25596	GEX1	YCL073C	343	364	GIWAPLGVTFFNFFTFFISCD	LLPFKLLSDR	YLYPVLLVSM
P25596	GEX1	YCL073C	383	404	IVNLPDFVAATASPFYSLLVA	MKESSTSAAR	KTRKLKLSVI
P25596	GEX1	YCL073C	407	428	KLKLSVIGGCAAWMVCMGLFY	FYSLLVAKTR	KYRGGSGSHE
P25596	GEX1	YCL073C	440	461	IAASVIMGLSGLLCSNSVIVI	RGGSGSHEGV	LQAMTTHSRM
P25596	GEX1	YCL073C	547	568	RIIMTVGLACTVPFFAFTMFM	AVVESYRYVQ	RDPELIDKAT
P36173	GEX2	YKR106W	58	79	KILLISTAFVCGFGISLDYTL	MSAQFDSLKY	RSTYTGYATN
P36173	GEX2	YKR106W	120	141	HFGRLRLFLVATIFYIMGTII	SQVVYSRLSD	QSQATRLTMY
P36173	GEX2	YKR106W	152	173	AGSVFYNCGYVGTNLLLTLIL	SQATRLTMYA	SDFSSLKWRM
	GEX2	YKR106W	184	207	YQYASYWPYIIIPWISGNIITAA	DFSSLKWRMF	NPQKNWSWNI
P36173	GEX2	YKR106W	216	237	IAMWAFIYPLSTLPIIFLILY	ANPQKNWSWN	MKYKSSKTAE
P36173	GEX2	YKR106W	275	296	IVGILLITVSLGCILVPLTLA	NLVFLFWKLD	NETSQKWHNS
P36173	GEX2	YKR106W	307	328	IIATLVSGGCLFFIFLYWEAK	ETSQKWHNSK	FAKSPLLPFK
P36173	GEX2	YKR106W	343	364	GIWAPLGVTFFNFFTFFISCD	LLPFKLLSDR	YLYPVLLVSM
P36173	GEX2	YKR106W	383	404	IVNLPDFVAATASPFYSLLVA	MKESSTSAAR	KTRKLKLSVI
P36173	GEX2	YKR106W	407	428	KLKLSVIGGCAAWMVCMGLFY	FYSLLVAKTR	KYRGGSGSHE
P36173	GEX2	YKR106W	440	461	IAASVIMGLSGLLCSNSVIVI	RGGSGSHEGV	LQAMTTHSRM
P36173	GEX2	YKR106W	471	492	AVITGIQYTFSKLGAAIGASV	LQAMTTHSRM	SGAIWTQTMP
P36173	GEX2	YKR106W	548	569	IIMTVGLACTVPFFTFTMFMR	VVESYRYVQR	NPELIDKATH
P38988	GGC1	YDL198C	13	34	LLGSASAGIMEIAVFHPVDTI	TDKKQSGLAR	SKRLMSNHTK
P38988	GGC1	YDL198C	84	101	QRVYKYGGQPFANEFLN	LGYAASYKVL	KHYKKDFDNL
P38988	GGC1	YDL198C	121	142	SAAAGSLIGIGEIVLLPLDVL	FGEKTGKAMR	KIKRQTNPES
P38988	GGC1	YDL198C	172	189	GWGWTAARNAPGSFALF	RDEGLFNLYR	GGNAFAKEYI
P38988	GGC1	YDL198C	213	234	FISSIVGACSSLIVSAPLDVI	DYSQATWSQN	KTRIQNRNFD
P38988	GGC1	YDL198C	267	285	GLTPKLLTTGPKLVFSFA	KNEGVTAFFK	LAQSLIPRFD
P25346	GIT1	YCR098C	44	65	IVTIIASGFALISDGYVNGSM	ETSKKDKWKN	SMLNKVFVME
P25346	GIT1	YCR098C	91	112	AALVGIIFGQFFMGIAADYYS	SSKVSTRVSN	RKSCILVATA
P25346	GIT1	YCR098C	114	136	SCILVATAILVIGSALCAASHG	GIAADYYSRK	TTVPGMFWML
P25346	GIT1	YCR098C	138	159	VPGMFWMLTVMRGLVGIGVGA	ALCAASHGTT	EYPTSTLSAN
P25346	GIT1	YCR098C	184	205	VMVTNLPLAFGGPFATIIFLI	YTTTKRGGIL	VYKICSGTKH
P25346	GIT1	YCR098C	216	237	EAIWRTVFAIGCFWPLSVFYF	YKICSGTKHL	RWKTATTEVY
P25346	GIT1	YCR098C	268	289	LLGTCGTWFMYDFVTFPNGIF	FLALKFYWKR	SSTIISSVIK
P25346	GIT1	YCR098C	306	327	VAEWNLLLGVLAVLGVPIGAY	VIKDQNDLVK	LSDRIGRKYT
P25346	GIT1	YCR098C	335	356	YTLMFGFSGYIIFGLIIGCAY	AYLSDRIGRK	DQLKKITPLF
P25346	GIT1	YCR098C	360	381	KITPLFIIFYAFMNMLGNAGP	IIGCAYDQLK	GDMLGVISSE
P25346	GIT1	YCR098C	399	420	VFYGLSAVTGKIGSVVGVECF	SEASATAVRG	QPIRDNLGAR
P25346	GIT1	YCR098C	430	451	WTFIIAAICGLIGIIITYFFV	QPIRDNLGAR	PHSLESDLMK
P36125	GMH1	YKR030W	89	110	PSFFIFQIALISLSSIIWSIY	QTKNQWARDD	NSGFNNDSDM
P36125	GMH1	YKR030W	134	155	MMVILDFFIFGFIMATIFYLL	IIGHFFKSLV	LNRSHFKFKS
P36125	GMH1	YKR030W	175	196	CFDVHCNSFLIILLCLYFIQF	SQNSVVEWAY	LLLPIINLQN
P36125	GMH1	YKR030W	216	237	YCFAIGHYFILTFYGYNQLPF	WISLLIGNSL	LKNLNFILLP
P36125	GMH1	YKR030W	242	263	FILLPTLGLSIIYLISLFGID	NQLPFLKNLN	LSKKLSFYNY
P48813	GNP1	YDR508C	154	175	VMMSLGTGIGTGLLVGNSKVL	LKKSIKPRHT	NNAGPGGLII
P48813	GNP1	YDR508C	177	198	AGPGGLIIGYAIMGSCVYCII	LVGNSKVLNN	QACGELAVIY
P48813	GNP1	YDR508C	219	240	LFLVDPALGFSVAWLFCLQWL	DLIGGFNTYP	CVCPLELVTA
P48813	GNP1	YDR508C	264	285	VFVVIFYVLIVVINVFGAKGY	KYWTTSVNPD	AEADFFFNCC
P48813	GNP1	YDR508C	289	310	FFFNCCKILMIVGFFILAIII	FGAKGYAEAD	DCGGAGTDGY
P48813	GNP1	YDR508C	342	363	GVVATFVTAAFAFGMSEQLAM	RGDTPIQRFK	TASEQSNPRK
P48813	GNP1	YDR508C	381	402	MIYRILFVFLASLTLVGFLVP	RKAIPSAAKK	YTSDQLLGAA
P48813	GNP1	YDR508C	432	453	VPHFINAVILLSVLSVANGAF	IAVSSHGVRV	YTSSRILMSL
P48813	GNP1	YDR508C	481	502	PAAAMLVSALFGVIAFCASSK	CFDYIDREGR	KEEDVFTWLL
P48813	GNP1	YDR508C	506	527	VFTWLLAISGLSQLFTWITIC	FCASSKKEED	LSHIRFRRAM
P48813	GNP1	YDR508C	560	581	AVLMMVLALIAQFWVAIAPIG	SQVGVWGSAY	GGGKLSAQSF
P48813	GNP1	YDR508C	590	611	FFENYLAMPIWIALYIFYKVW	GGGGKLSAQS	KKDWSLFIPA
Q12096	GNT1	YOR320C	10	31	FIVFILFGVLTVFVVSRLVVH	MRLISKRRIR	FQYNQEIKFY
P38736	GOS1	YHL031C	204	222	AFVLATITTLCILFLFFT	MKINTRRKKN	W
Q03554	GOT1	YMR292W	8	29	FGVAFTFGGFLFFLFGIFTFF	MWLTEAQK	DRALLALGNI
Q03554	GOT1	YMR292W	31	52	ALLALGNILFLIGVFLIIGSQ	LFGIFTFFDR	KTYIFFTRPN
Q03554	GOT1	YMR292W	67	88	LFFLVGAFLILLKWTFLGFII	FTRPNKRRGS	ESLGIIGLFG
Q03554	GOT1	YMR292W	112	133	IIGPILSHPAIAPIVDKLAGV	VIVQFLRSMP	RVLPV
P53306	GPI1	YGR216C	186	207	IGFYLTFVICSIASLVSSLLN	STCIYKMVAK	YSHFQLVNYS
P53306	GPI1	YGR216C	280	301	TIWLIINDISFGLILGAILIE	FYPDYILLYN	NRDFLVSASH
P53306	GPI1	YGR216C	380	401	MMFLVGFSFAVSLAIDFFAIL	LSSLLTLTIY	SFPIYVFYRI
	GPI1	YGR216C	414	432	LYHCQLNIMASLFNLFCG	IYVFYRISSK	KKRNVLRNRI
P53306	GPI1	YGR216C	451	472	LLLGTLLFIILVFLTPTVMAF	IDHNYFQLDQ	YMSYTVLRML
P53306	GPI1	YGR216C	485	506	IEIFSEAVIALINHFPLFALL	YTVLRMLTIT	LRLKDPKRLP
P30777	GPI10	YGL142C	16	37	IFWVFLAFRVLNAVLTRTFFQ	RIKPKLGRTQ	ADEFWQALEP
P30777	GPI10	YGL142C	86	107	ILLHYALLLLSTIGSDLLILL	LTYRLVSLSS	LPKYELSWQV
P30777	GPI10	YGL142C	136	157	VIYAPKIVMAVLASIGEYYIV	DVTRSFEYYG	RFVQKLYLLT
P30777	GPI10	YGL142C	188	209	FALLLSLTNFFNCFFITRTFI	RRSGLSEITK	NSFEMILTSI
P30777	GPI10	YGL142C	240	261	LIFAFLACLQRPSSGLIWVIP	MIKESSFTKS	SISLILNLVG
P30777	GPI10	YGL142C	278	299	FITFSKVLRSFFLVFTANAII	LVGKKQYHLL	DMYFYEKVTF
P30777	GPI10	YGL142C	338	359	SLPIVLGASIPAFAFGLFFPL	VAPWHFHFFQ	SKRSFPKKYL
	GPI10	YGL142C	367	390	YLNPFFQVKLTILLNLLVYSTLP	PLSKRSFPKK	HKEFRFIFPL
P30777	GPI10	YGL142C	392	413	EFRFIFPLQPLFILISSFGLL	LLVYSTLPHK	RLDRDYWKRL
P30777	GPI10	YGL142C	423	444	SGLKSLLWLVPFVSVFIALLL	RLDRDYWKRL	DTFHESGSIE
Q06636	GPI11	YDR302W	45	66	TPLMTFPYHLVALLYYYVFVS	HDRPPVYVRK	SNFNTVKLLS
Q06636	GPI11	YDR302W	67	88	NFNTVKLLSFLIPTQVAYLVL	LLYYYVFVSS	QFNKCTVYGN
Q06636	GPI11	YDR302W	108	129	IICLGVTFLLSFPTMLLTILF	KIIKINYSLT	GAPLMDLLWE
Q06636	GPI11	YDR302W	135	156	LLWETWLLSLHFAFLAYPAVY	TILFGAPLMD	SVFNCDFKVG
Q06636	GPI11	YDR302W	170	191	YFIFIVVGGWISCVVIPLDWD	CDFKVGLWKK	RDWQNWPIPI
Q06636	GPI11	YDR302W	198	217	IPIVVGGYLGALVGYTIGA	DWDRDWQNWP	YI
P23797	GPI12	YMR281W	20	38	LAIVLTILYIYFTPKIVS	FSKLLYKITK	RNNASLQHIF
Q07830	GPI13	YLL031C	33	54	FYIILLVFIAILQFISIAFFT	RIKKFQKNHK	RGFLLSRHVL
Q07830	GPI13	YLL031C	346	367	VSSLALLMGQPIPFNNLGWPI	DYRSVRQIDL	DEIARNDREW
Q07830	GPI13	YLL031C	456	477	LLATSLVLLISITKLIPSIVV	DYYSIATGIT	NQMVPEFVPG
Q07830	GPI13	YLL031C	483	504	FVPGIIIMVLVTNLCFHGIFY	SIVVNQMVPE	VYQQPSFVDQ
Q07830	GPI13	YLL031C	514	535	FWGTLLATAIGIIIGCYITIF	VYQQPSFVDQ	DRYNFIWIAM
Q07830	GPI13	YLL031C	557	578	IAVMFMIIHALLFTSNSFTIW	GETLADYWSR	EDRIVAFLLS
Q07830	GPI13	YLL031C	581	602	IVAFLLSTFGMLTLYEFVFLP	SNSFTIWEDR	KRQSTTALLT
Q07830	GPI13	YLL031C	643	664	LGGYHSAVLIIFTRLASMITI	YLPLTRFARL	CREEQGEYCI
Q07830	GPI13	YLL031C	684	705	WWVLGLCFLMIFILPACITGY	PTFNNQNNSS	YNLTSSYQAA
Q07830	GPI13	YLL031C	714	735	AAPIWINVFLKGILGLNFVYW	YYNLTSSYQA	SLTSLENNSA
Q07830	GPI13	YLL031C	764	785	IIAGFSLIASNVGWLMGPLCI	VTIFKFTLAR	KLNIHNTDVK
Q07830	GPI13	YLL031C	805	826	NIYGSEFFLLVINVLISILLF	SHEATILGYT	NKPLAQLSYF
Q07830	GPI13	YLL031C	828	849	PLAQLSYFLMCNQLLSILEII	VLISILLFNK	DLLKLKENII
Q07830	GPI13	YLL031C	902	923	IAIILNTFGPHILVSLSVALL	SEKVTFPFTQ	TLWSQPPDVL
Q07830	GPI13	YLL031C	946	967	GILLTYNTILCLSSFIWVTHF	TLLGRIVSNC	RRHLMVWKIF
Q07830	GPI13	YLL031C	980	1001	FIFASLSLIVTQLVVTFGTIA	LMVWKIFCPR	FASGRLIKHI
P47088	GPI14	YJR013W	4	25	EWGLTVLSFLVRVGFFLFGIY	MTGE	QDANFKVRYT
P47088	GPI14	YJR013W	78	99	WFHLGKVIFVIFDLVTGLIIM	WLLVPNHYFG	KLLNQAISRK
P47088	GPI14	YJR013W	110	131	ALILESIWLLNPMVITISTRG	LLNQAISRKR	NAESVLCCLI
P47088	GPI14	YJR013W	132	149	AESVLCCLIMFTLFFLQ	MVITISTRGN	KSRYTLAGIL
P47088	GPI14	YJR013W	160	181	GLSIHFKIYPIIYCIPIAIFI	SRYTLAGILY	YYNKRNQGPR
P47088	GPI14	YJR013W	193	214	LTSLLNIGLSTLTTLLGCGWA	NKRNQGPRTQ	MYKIYGYEFL
P47088	GPI14	YJR013W	266	287	FVPQLLLVLVTGCLEWWNPTF	NGESNLSRYA	DNLLRVLFVQ
P47088	GPI14	YJR013W	310	331	QYFVWYLIFLPFYLSRTHIGW	FVTYNKVCTS	KKGLLMATLW
P47088	GPI14	YJR013W	334	355	LLMATLWVGTQGIWLSQGYYL	SRTHIGWKKG	EFEGKNVFYP
P47088	GPI14	YJR013W	361	382	VFYPGLFIASVLFFVTNVWLL	GYYLEFEGKN	GQFITDIKIP
P53961	GPI15	YNL038W	58	79	IQYHQIVLILLLNILFYVICL	QNGRVEINMG	RSRFLEHINR
P53961	GPI15	YNL038W	100	121	ILIIMGLFALGTIILVRGPSV	FEVTIARSFQ	ETVTIFKESG
P38875	GPI16	YHR188C	551	572	VIILTSTIMGLIFGMLYNLMV	STPDFSMPYN	KRMVTVEEAD
Q04080	GPI17	YDR434W	8	29	WVGFCFVAIYLFLGVPLWYKL	MSNANLRK	TTVYRASLPI
Q04080	GPI17	YDR434W	472	493	MIAVYLPLLGPISAVMFFGFY	VQQNFFPQEH	NVMKEKNQKS
P38211	GPI18	YBR004C	1	22	IVGLTLYFVLFRSIQYLLVFL	M	TPIRQFDTST
P38211	GPI18	YBR004C	109	130	VGVAIENVLFYLSGIVLYFLT	NNDSIYHALR	KKIFSQNIRQ
P38211	GPI18	YBR004C	161	182	GFLTSIYSEPLSFFFAFVGIW	SLLFFLTSAA	SRECSISVPV
P38211	GPI18	YBR004C	215	236	LASLNRSNCVLLGIYFIFDLI	YSFISMACFT	ELTKNRKFVK
P38211	GPI18	YBR004C	243	264	FVKAICFPLLSGSLMFSALLY	DLIELTKNRK	QQYYLPYKTF
P38211	GPI18	YBR004C	318	339	IPNFLFAVPNIIILIYSSIYF	GLLKYWTPNN	SKIYPSYNLK
P38211	GPI18	YBR004C	350	371	LVWITRALVVIVCFFAHVQIL	KIYPSYNLKA	NRIASFLPLH
P38211	GPI18	YBR004C	409	430	FYIYWLAFWIPLQTILFAAFL	NPKGDDKIVK	PPA
Q04082	GPI19	YDR437W	12	33	MIITSTLVLTIIWSILPSSLG	TKEYYWFSQY	EAAPKQFINT
Q04082	GPI19	YDR437W	52	73	WIITLESIMLMGMLCTYIGLL	TLLDIFPQRR	MYNEDTLTPP
P46961	GPI2	YPL076W	53	74	LDFISFYQTILNTSFIYITFT	LSEAARAQIR	YIYYYGFDPI
P46961	GPI2	YPL076W	75	96	IYYYGFDPIPPTIFLSFITLI	TSFIYITFTY	ISRTKVDPLL
P46961	GPI2	YPL076W	108	129	FMDVKSSLIITFAMLTLSPVL	RTKVDPLLSS	KSLSKTTASD
P46961	GPI2	YPL076W	135	156	TASDSIWTLSFWLTLWYIFVI	SPVLKSLSKT	SSTKSKDKPS
P46961	GPI2	YPL076W	189	210	VFCFLLICIQLNIILPTYLSV	LSSRLSTTID	TNKVVPIISN
P46961	GPI2	YPL076W	220	241	IIVYSFLNVALGWIYMLLIFF	TNKVVPIISN	ASVFYITVLP
P49018	GPI8	YDR331W	376	397	SFKQSATIILALIVTILWFML	DIDSNECFFT	RGNTAKATYD
Q12361	GPR1	YDL035C	56	79	IIAITASAVSLIAGCLGMFFLSK	FTAPQLLQLR	MDKRRKVFRH
Q12361	GPR1	YDL035C	91	114	IAFLIICDFLKAFILMIYPMIIL	KRRKVFRHDL	INNSVYATPA
Q12361	GPR1	YDL035C	133	156	AFAIEGADMAIMIFAIHFAILIF	AFFNTLGWFT	KPNWKWRNKR
Q12361	GPR1	YDL035C	178	198	SYIWPITALVPAILASLAFI	NMEGGLYKKR	NYNKLNDDSD
Q12361	GPR1	YDL035C	250	273	WGPRYFIIIFIFAVYLSIYIFIT	KPYWYKIVLS	SESKRIKAQI
Q12361	GPR1	YDL035C	619	642	LRAIFIYPLSYIGIWLFPIIADA	KKRRAQIQKN	LQYNHEIKHG
Q12361	GPR1	YDL035C	822	843	VEVPLFWRIIHHIPMLGGIDL	AMLNNITAEE	DELNRLLKIR
P36148	GPT2	YKR067W	30	55	FVYNIHTWLYDVSVFLFNILFTIFF	SRRYKNSYNG	REIKVRGAYN
P36148	GPT2	YKR067W	68	85	VGVPTILVCAPHANQFI	KVRGAYNVPE	DPALVMSQTR
	GPT2	YKR067W	452	475	VFAILSLPGSILFTPIFIICRVY	TLIVRLIKFS	SEKKAKEGLK
P36148	GPT2	YKR067W	501	524	LIVALILAPILYVTYSILLIILA	KGTDLLATWK	RKQHYCRIWV
P36148	GPT2	YKR067W	538	555	AFIQFVYFYALLVFTTY	YCRIWVPSNN	SSLKTGEIGV
P40989	GSC2	YGR032W	473	494	IWIMHISVYWMYCAYNAPTFY	WLHLVTNFNR	THNYQQLVDN
P40989	GSC2	YGR032W	511	532	WATAALGGTVASLIQVAATLC	VDNQPLAAYK	EWSFVPRKWA
P40989	GSC2	YGR032W	550	571	FWFLCVIMGINLGPVIFVFAY	WAGAQHLSRR	DKDTVYSTAA
P40989	GSC2	YGR032W	582	603	VVGAVMFFVAVATLVFFSVMP	KDTVYSTAAH	LGGLFTSYMK
	GSC2	YGR032W	640	663	YLVWVTVFAAKYAESYFFLILSL	PLHGLDRWMS	RDPIRILSTT
	GSC2	YGR032W	693	716	IVLGLMIATDFILFFLDTYLWYI	GNKICKVQPK	VVNTVFSVGK
	GSC2	YGR032W	1375	1398	RYTLSIFIVFWIAFVPIVVQELI	NFHPAIDWVR	ERGLWKATQR
	GSC2	YGR032W	1458	1481	ILYSRFAGSAIYMGSRSMLMLLF	GFATSRIPFS	GTVAHWQAPL
	GSC2	YGR032W	1490	1513	LLWFWASLSALIFAPFIFNPHQF	FGTVAHWQAP	AWEDFFLDYR
P40989	GSC2	YGR032W	1579	1600	IMAEIIPCAIYAAGCFIAFTF	DASRAHRTNL	INAQTGVKTT
P40989	GSC2	YGR032W	1620	1641	IIICTLAPIVIDIGVLFFCMG	DEDRVNSTLR	LSCCSGPLLG
	GSC2	YGR032W	1659	1682	VMAGIAHGIAVVVHIVFFIVMWV	LGMCCKKTGS	LEGFSFVRML
	GSC2	YGR032W	1691	1714	LIGVVTCIQCQRLIFHCMTVLLL	VLEGFSFVRM	TREFKNDHAN
P40989	GSC2	YGR032W	1758	1779	FAADFVLGHVILIFQLPVICI	LTAKVIELSE	PKIDKFHSIM
P40989	GSC2	YGR032W	1821	1842	LYFLVLIIFAGCIVGPAVASA	RKRMVRRYCS	HVPKDLGSGL
Q04697	GSF2	YML048W	177	198	VAQWLFFVMHIFKVGIITLFL	QEVQANYSSL	KLGIANPISF
P39996	GTT3	YEL017W	239	260	LPILTWLLFFRGIPTLVSYYI	NKYQYTLDFC	NFIRYDLNIE
P39996	GTT3	YEL017W	313	336	VNRSLGMVPLVFSMVSCLLTLYV	VNQLWTQLCT	L
P53154	GUP1	YGL084C	43	64	FYYIAFLVVVPLMFYAGLQAS	PSLWKTTEFK	SPENPNYARY
P53154	GUP1	YGL084C	101	122	FALLSVLMLVHTSIKRIVLYS	DSQYRFFRDN	TNITKLRFDL
P53154	GUP1	YGL084C	131	152	LIFGLIFLVAAHGVNSIRILA	STNITKLRFD	HMLILYAIAH
	GUP1	YGL084C	165	185	NFRRIATISIWIYGISTLFI	ILYAIAHVLK	NDNFRAYPFG
P53154	GUP1	YGL084C	276	297	MNYIAYVTYTPLFIAGPIITF	AAHPIQDYSL	NDYVYQSKHT
P53154	GUP1	YGL084C	322	343	FVIALLSMEFILHFLHVVAIS	FKFIFYYAVR	KTKAWENDTP
P53154	GUP1	YGL084C	352	373	PFQISMIGLFNLNIIWLKLLI	SKTKAWENDT	PWRLFRLWAL
P53154	GUP1	YGL084C	432	449	VLTSLAVFSFVAIWHDI	YIPLGGSKNR	ELKLLLWGWL
P53154	GUP1	YGL084C	454	474	LWGWLIVLFLLPEIFATQIF	IWHDIELKLL	SHYTDAVWYR
P53154	GUP1	YGL084C	485	506	VCAVGAVFNIWVMMIANLFGF	HYTDAVWYRH	CLGSDGTKKL
P53154	GUP1	YGL084C	526	547	FKFVILASVSLFIAVQIMFEI	LSDMFCTVSG	REEEKRHGIY
Q08929	GUP2	YPL189W	75	95	LYYLAFTVVVPFMIKAALAT	PPLWNTWEFR	SSESNPNYYK
Q08929	GUP2	YPL189W	128	151	FFRSNFFLLAILILLQIILKKVF	KVDNSDPQYR	VKFSKIPKTK
Q08929	GUP2	YPL189W	163	186	FACGLVFVCFMYGINSVKLFTHA	FSKIPKTKFD	FIFFTLAHSL
Q08929	GUP2	YPL189W	200	218	LIAAFAIWSYGIFTLFIN	TLAHSLKRKR	QKMKNLPFNN
Q08929	GUP2	YPL189W	322	345	YNFINFIAYITYAPLFLVGPIIT	RLVAEHHIQD	FNDYLYQSEN
Q08929	GUP2	YPL189W	364	387	IGFYALKVFSSLLLMEIILHYIY	NKLPSLTKKN	VGAIARTKAW
Q08929	GUP2	YPL189W	407	427	IALFNLNIMYLKLLIPWRLF	NNDTPLQQAM	RLWAMVDGID
Q08929	GUP2	YPL189W	500	523	RVLFWGWLTVLLLLGETYITNCF	FVAIWHDIQL	SRYRFRSWYR
Q08929	GUP2	YPL189W	534	557	VCGIGAAINICMMMIINVYGFCL	RYRFRSWYRF	GAEGTKLLLK
Q08929	GUP2	YPL189W	576	594	EFLTAVMVSLFIAVQVMF	KGIFNNSHSP	EIREEEKRHG
P47026	GWT1	YJL091C	19	40	ITEINAVTSIALVTYISWNLL	DFVTGLNGGS	KNSNLMPPGI
P47026	GWT1	YJL091C	54	75	YIIDFALNWVALLLSITIYAS	LMPPGISSVQ	EPYLLNTLIL
P47026	GWT1	YJL091C	76	97	PYLLNTLILLPCLLAFIYGKF	LLSITIYASE	TSSSKPSNPI
P47026	GWT1	YJL091C	128	149	YRGGMLILTAIAILAVDFPIF	QLEKKPYITA	PRRFAKVETW
P47026	GWT1	YJL091C	157	178	TWGTSLMDLGVGSFVFSNGIV	IFPRRFAKVE	SSRALLKNLS
P47026	GWT1	YJL091C	199	220	FNALKSGGTLLFLGLLRLFFV	KSKPSFLKNA	KNLEYQEHVT
P47026	GWT1	YJL091C	231	252	YGVHWNFFITLSLLPLVLTFI	NLEYQEHVTE	DPVTRMVPRC
P47026	GWT1	YJL091C	257	278	MVPRCSIAIFISCIYEWLLLK	VLTFIDPVTR	DDRTLNFLIL
P47026	GWT1	YJL091C	301	322	IFSFLGYCSIFLWGQNTGFYL	NCFFSANREG	LGNKPTLNNL
P47026	GWT1	YJL091C	356	377	TPLSGLCIWSTIFLVISQLVF	SSTWDYWTSV	QYHPYSVSRR
P47026	GWT1	YJL091C	390	411	LPYTLWVITYNLLFLTGYCLT	PYSVSRRFAN	DKIFGNSSEY
P47026	GWT1	YJL091C	435	456	LFLFLLANVSTGLVNMSMVTI	ECLESINSNG	DSSPLKSFLV
P47026	GWT1	YJL091C	460	481	LKSFLVLLAYCSFIAVISVFL	MSMVTIDSSP	YRKRIFIKL
Q03281	HEH2	YDR458C	316	337	LFIWLWNGAIFLSIICPILFG	IDIMKPFIAH	LWYREQRIQV
Q07534	HEM25	YDL119C	13	39	LIGGFFGGLTSAVALQPLDLLKTRIQ	QATKPRNSSH	QDKKATLWKN
Q07534	HEM25	YDL119C	61	88	GTLPSALRTSIGSALYLSCLNLMRSSL	EIDSPLQLWR	AKRRNAVPSL
Q07534	HEM25	YDL119C	120	146	LLTGAFARGLVGYITMPITVIKVRYE	SLPRLTMYEN	STLYNYSSLK
Q07534	HEM25	YDL119C	173	197	GFGATCLRDAPYAGLYVLLYEKSK	TKEGLFGFFR	QLLPMVLPSR
Q07534	HEM25	YDL119C	224	251	VNTTSAVLSASLATTVTAPFDTIKTRM	GGFTTYTSTT	QLEPSKFTNS
Q07534	HEM25	YDL119C	279	298	GLSMRLARKAFSAGIAWGI	KNENVLKLFS	YEELVKRFM
Q04458	HFD1	YMR110C	133	152	IIAPFNFPLLLAFAPLAAA	VEKISRGSVL	LAAGNTIVLK
P06775	HIP1	YGR191W	95	116	LTLAVGGAIGTGLYVNTGAAL	LSKDLSVRHL	STGGPASLVI
P06775	HIP1	YGR191W	121	142	ASLVIDWVIISTCLFTVINSL	TGAALSTGGP	GELSAAFPVV
P06775	HIP1	YGR191W	165	185	SFAFAVNLNYLAQWLVLLPL	NVYSMRFIEP	ELVAASITIK
P06775	HIP1	YGR191W	203	223	DAWVAIFYATIALANMLDVK	IKYWNDKINS	SFGETEFVLS
P06775	HIP1	YGR191W	236	255	ILSIIGFTILGIVLSCGGG	ETEFVLSMIK	PHGGYIGGKY
P06775	HIP1	YGR191W	279	297	QFKGLCSVFVTAAFSYSG	GAFVGHSSGT	IEMTAVSAAE
P06775	HIP1	YGR191W	321	342	TFWLITASYVTILTLIGCLVP	RETIPKAAKR	SNDPRLLNGS
P06775	HIP1	YGR191W	376	396	LMNAIILIAVVSVANSAVYA	ENGGIKGLPS	CSRCMVAMAH
P06775	HIP1	YGR191W	423	442	MNAILLTLFFGLLSFVAAS	LNRVDKRGRP	DKQAEVFTWL
P06775	HIP1	YGR191W	451	472	LSALSGLSTIFCWMAINLSHI	SDKQAEVFTW	RFRQAMKVQE
P06775	HIP1	YGR191W	491	510	SQTGVKGSWYGFIVLFLVL	ERSLDELPFI	IASFWTSLFP
P06775	HIP1	YGR191W	530	549	FFEGYLSFPILIVCYVGHK	LGGSGASAES	LYTRNWTLMV
P41809	HKR1	YDR420W	1485	1506	IIIFLIVLTIGVLLWLFVAFF	SASAGKYAVK	AFRHRNILLK
P12683	HMG1	YML075C	28	49	IILFSLIISAFAYLSVIQYYF	SRFSAKRPIH	NGWQLDSNSV
P12683	HMG1	YML075C	187	208	FDVLIMVTAYLMMFYTIFGLF	FSENVTQADP	NDMRKTGSNF
P12683	HMG1	YML075C	217	238	FWLSASTVVNSASSLFLALYV	FNDMRKTGSN	TQCILGKEVS
P12683	HMG1	YML075C	246	267	VSALTLFEGLPFIVVVVGFKH	YVTQCILGKE	KIKIAQYALE
P12683	HMG1	YML075C	309	330	LLCIFAFIGCSMYAHQLKTLT	EEGGRLIQDH	NFCILSAFIL
P12683	HMG1	YML075C	336	357	AFILIFELILTPTFYSAILAL	KTLTNFCILS	RLEMNVIHRS
P12683	HMG1	YML075C	400	421	LSVVVIIMKLSVILLFVFINF	EKKSVSSFLN	YNFGANWVND
P12683	HMG1	YML075C	498	519	FVSKLVLSALVCSAVINVYLL	RNVSVAIRDR	NAARIHTSYT
P12684	HMG2	YLR450W	24	45	YPIHVIVVAVLLSAAAYLSVT	FACTARFSAR	QSYLNEWKLD
P12684	HMG2	YLR450W	186	207	FDLFIILAAYLTLFYTLCCLF	FSNKTSEFDQ	NDMRKIGSKF
P12684	HMG2	YLR450W	216	237	FWLSFSALSNSACALYLSLYT	FNDMRKIGSK	THSLLKKPAS
P12684	HMG2	YLR450W	243	264	KPASLLSLVIGLPFIVVIIGF	SLYTTHSLLK	KHKVRLAAFS
P12684	HMG2	YLR450W	301	322	AYLIRDYLFYISSFIGCAIYA	IIYEAMFQEG	RHLPGLVNFC
P12684	HMG2	YLR450W	324	345	LPGLVNFCILSTFMLVFDLLL	FIGCAIYARH	SATFYSAILS
P12684	HMG2	YLR450W	402	423	AIILGKASVIGLLLLINLYVF	SEPHFLRSNV	TDKLNATILN
P12684	HMG2	YLR450W	497	518	FISKLLFFAFAVSISINVYLL	DSVSNAIRDQ	NAAKIHTGYM
P32339	HMX1	YLR205C	289	310	LHTVMLLVLSIIAIWVLYFLV	FNKDSATRRA	KSFLSIV
P19807	HNM1	YGL077C	57	78	FSLWSILGVGFGLTNSWFGIS	ADGEVHLRKS	TSMVAGISSG
P19807	HNM1	YGL077C	87	108	GGPMMIVYGIIIVALISICIG	STSMVAGISS	TSLGELSSAY
	HNM1	YGL077C	145	168	SFAYAGSVFTSASTTLSVATEVV	YKRFAAYMCG	GMYALTHPEF
P19807	HNM1	YGL077C	182	203	WHIFVCFELLHLFLMFFNCYG	LTHPEFIPKR	KSLPIISSSS
P19807	HNM1	YGL077C	205	226	LPIISSSSLYISLLSFFTITI	LMFFNCYGKS	TVLACSHGKF
P19807	HNM1	YGL077C	255	276	GIAFIVGLINPAWSFSCLDCA	FNNETGWKNG	THMAFEVEKP
P19807	HNM1	YGL077C	293	314	IMGTVAIGFVTSFCYVIAMFF	EKPERVIPIA	SIQDLDAVLS
P19807	HNM1	YGL077C	342	363	SGAIFLGCLILFTSFGCVIAC	DIYNQALGNK	HTWQARLCWS
P19807	HNM1	YGL077C	398	417	AHLMSCAWITLIGLLYLAS	VNPHTGVPLN	STAFQSLITG
P19807	HNM1	YGL077C	426	445	GCIAFLLLSYIIPVICLLA	SSTAFQSLIT	KKRNIAHGPF
P19807	HNM1	YGL077C	465	486	IVLLGWTVFSVVFFSFPPVLP	WLGKFGFFSN	VTKDNMNYVC
P19807	HNM1	YGL077C	491	512	MNYVCVVIVGYTAYSILYWKY	PPVLPVTKDN	KGKKEFHALE
P47124	HOC1	YJR075W	13	34	LMIFAIIALISLAFGVRYLFH	TTKRASSFRR	NSNATDLQKI
P53389	HOL1	YNR055C	66	87	FGLMAFITAFTAATSNDAGAA	NWSSWRKLAH	QDSLNEIYGI
P53389	HOL1	YNR055C	103	124	TGAGVLFLGIGWSTLFLAPFA	IYGISYDSMN	NLYGRKITYI
P53389	HOL1	YNR055C	130	151	ITYIVCTTLGLFGALWFALAK	APFANLYGRK	RTSDTIWSQL
P53389	HOL1	YNR055C	189	210	VLTVYIMCTSIGTFLGPLIAG	DIFFQHQLGS	YISAFTNFRW
P53389	HOL1	YNR055C	219	240	WVGWVAVIISGGLLITIIFGC	GYISAFTNFR	EETYFDRGQY
P53389	HOL1	YNR055C	362	383	MFLFPPVWLSGMFWGIQDVFL	YFKYLKINLR	TFYLTTQESA
P53389	HOL1	YNR055C	413	434	LIGAVIGCICAGIVSDYFVLW	FGVAIMNVPT	MARHNRGILE
P53389	HOL1	YNR055C	448	469	LYFSIATAIIGPAGLLMFGIG	NRGILEAEFR	TARQWPWQAI
P53389	HOL1	YNR055C	477	498	AIYVGLGFVGFAWGCSGDIAM	IGTARQWPWQ	AYLMDCYPDM
P53389	HOL1	YNR055C	508	529	VLEGMVCTAIINNTISCIFTF	AYLMDCYPDM	TCSDWLAASG
P53389	HOL1	YNR055C	544	565	IALAVINFGITAFALPMYYYG	LAASGTENTY	KRIRLWTKRW
Q08109	HRD1	YOL013C	8	29	QLAIFVVVTYLLTFYCVYSAT	MVPENRRK	KTSVSFLQVT
Q08109	HRD1	YOL013C	45	66	FNLMVLSIFILLNSTLLWQLL	LQVTLKLNEG	TKLLFGELRL
Q08109	HRD1	YOL013C	82	103	FERLPFTIINTLFMSSLFHER	ELRLIEHEHI	YFFTVAFFGL
Q08109	HRD1	YOL013C	104	125	FFTVAFFGLLLLYLKVFHWIL	FMSSLFHERY	KDRLEALLQS
Q08109	HRD1	YOL013C	144	165	LIFSRFSFNLVLLAVVDYQII	SINDSTTMKT	TRCISSIYTN
Q08109	HRD1	YOL013C	184	205	LYLIQVMEFTMLLIDLLNLFL	NQKSDIESTS	QTCLNFWEFY
Q05787	HRD3	YLR207W	767	788	LVTMGCILGIFLLSILMSTLA	SEILGFQMED	ARRGWNVRFN
P25619	HSP30	YCR021C	34	55	LWAVFAVFGFILLCYVVMFFI	MHITKRGSDW	AENKGSRLTR
P25619	HSP30	YCR021C	65	86	YALAPAFLITFFEFFAFFTYA	AENKGSRLTR	SDLGWTGVQA
P25619	HSP30	YCR021C	121	142	YIAWFLSWPCLLFLIELAAST	PGIRQIFYSK	TGENDDISAL
P25619	HSP30	YCR021C	157	178	LLIQIVGTLFWVVSLLVGSLI	DISALDMVHS	KSTYKWGYYT
P25619	HSP30	YCR021C	181	202	YKWGYYTIGAVAMLVTQGVIC	LLVGSLIKST	QRQFFNLKTR
P25619	HSP30	YCR021C	215	236	ALMLCTCMVIVWLYFICWGLS	FFNLKTRGFN	DGGNRIQPDG
P25619	HSP30	YCR021C	248	269	IFYGVLDLCVFAIYPCYLLIA	GNRIQPDGEA	VSRDGKLPRL
P45820	HUR1	YGL168W	17	34	MFPLISTFTSIGLGVLM	VNICTYIHLH	KDKGKEGKTI
Q12520	HUT1	YPL244C	4	25	TSSLVICAIGIYATFLTWALV	MAGS	QEPLATRTWP
Q12520	HUT1	YPL244C	42	63	FPNVISLIQASVAMMMGYLYL	TWPNSMGKFQ	NWKKVEYPPR
Q12520	HUT1	YPL244C	106	127	LTYMLAKSCKMIPVLLVHLLL	ATTSLKHVDY	YRTPIASQKK
Q12520	HUT1	YPL244C	136	157	KVVALLVSLGVTIFTIGGNDG	LYRTPIASQK	KKLKRSFNES
Q12520	HUT1	YPL244C	174	192	GFGLLFSSLFLDGLTNAT	NESGNDNKLQ	QDKLLKANKA
Q12520	HUT1	YPL244C	214	235	HLMFTLNLFVILWNILYFIVI	KGKQTLITGA	DCKQWDNAVS
Q12520	HUT1	YPL244C	245	266	VLTMDPQVWGYLMLYSFCGAM	DCKQWDNAVS	GQCFIFYTLE
Q12520	HUT1	YPL244C	280	303	LVLIMITVTRKMVSMILSIIVFG	IFYTLEQFGS	KSVRFQQWVG
Q12520	HUT1	YPL244C	307	327	FQQWVGMFIVFGGITWEALN	SIIVFGKSVR	KKKANIPKAK
P0CE11	HVG1	YER039C	15	36	IYTIFKNLTIILIAYGEVLFF	SKSLQYLAVP	GGKVTSMELT
P0CE11	HVG1	YER039C	47	68	FIMMVLSSVVATWGDQQAIAI	GKVTSMELTS	KASSLEDLDQ
P0CE11	HVG1	YER039C	84	105	IFVLNPGYLWMFTNCISSALF	DLDQELVEST	VLIMRKRIRL
P0CE11	HVG1	YER039C	122	143	TMFYNNVLALPLLLVFSFIME	IRLTNFKDYD	DWSTKNLSVN
P0CE11	HVG1	YER039C	159	180	AAMVISGLMSVGISYCSGWCV	LSVNLSADSL	RVTSSTTYSM
P0CE11	HVG1	YER039C	186	207	TYSMVGALNKLPIALAGLVFF	GWCVRVTSST	DAPKNFLSFF
P0CE11	HVG1	YER039C	211	232	NFLSFFSIFLGFLSGLLYAVA	AGLVFFDAPK	KQKKIQQQKV
P32465	HXT1	YHR094C	60	81	VYVTVSICCVMVAFGGFIFGW	AVAPPNTGKG	DTGTISGFVA
P32465	HXT1	YHR094C	116	137	LIVSIFNIGCAIGGIVLAKLG	SHYLSKVRTG	DMYGRRIGLI
P32465	HXT1	YHR094C	143	164	IGLIVVVVIYTIGIIIQIASI	AKLGDMYGRR	NKWYQYFIGR
P32465	HXT1	YHR094C	174	195	IISGLGVGGITVLSPMLISEV	NKWYQYFIGR	APSEMRGTLV
P32465	HXT1	YHR094C	201	222	GTLVSCYQVMITLGIFLGYCT	ISEVAPSEMR	NFGTKNYSNS
P32465	HXT1	YHR094C	236	257	VPLGLCFAWALFMIGGMMFVP	KNYSNSVQWR	ESPRYLVEAG
P32465	HXT1	YHR094C	340	357	NYFFYYGTIVFQAVGLS	IQSLQQLTGD	DSFETSIVFG
P32465	HXT1	YHR094C	363	381	IVFGVVNFFSTCCSLYTV	VGLSDSFETS	DRFGRRNCLM
P32465	HXT1	YHR094C	388	409	CLMWGAVGMVCCYVVYASVGV	YTVDRFGRRN	TRLWPNGQDQ
P32465	HXT1	YHR094C	431	452	FACFYIFCFATTWAPIAYVVI	SKGAGNCMIV	SECFPLRVKS
P32465	HXT1	YHR094C	469	490	AANWIWGFLISFFTPFITGAI	VKSKCMSIAS	NFYYGYVFMG
P32465	HXT1	YHR094C	491	512	FYYGYVFMGCMVFAYFYVFFF	FTPFITGAIN	VPETKGLSLE
[truncated: 3,761 more rows]
