# Supplementary figures and images for: The ER membrane protein complex interacts cotranslationally to enable biogenesis of multipass membrane proteins
Source: eLife journal article supplement (doi:10.7554/elife.37018), 2018-05-29

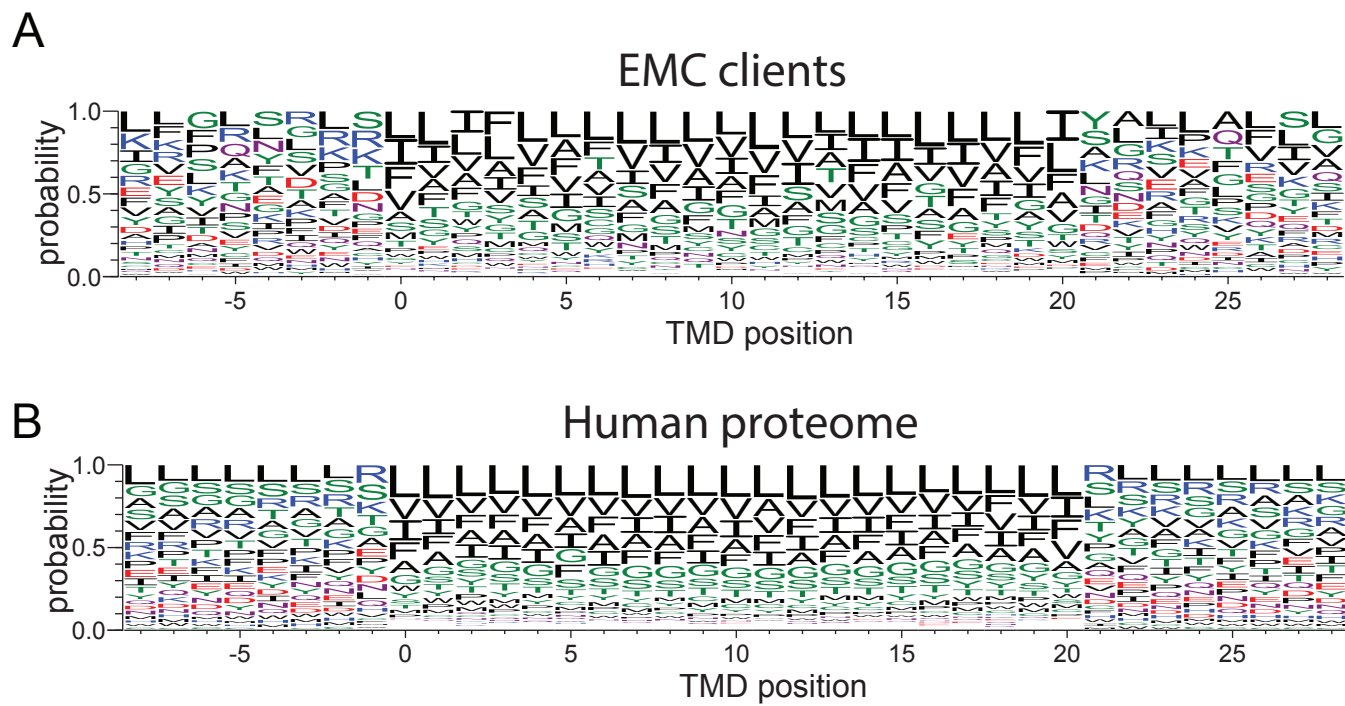

Supplement: supp [file elife-37018-supp-v1.zip]
